# Supplementary material for: Comparison of differentially expressed genes in longissimus dorsi muscle of Diannan small ears, Wujin and landrace pigs using RNA-seq
Source: Front Vet Sci. 2024 Jan 5;10:1296208. doi: 10.3389/fvets.2023.1296208 (PMC10796741; doi:10.3389/fvets.2023.1296208)
Supplement: Supplementary file 4 [file Table_1.XLS]

## Sheet: MapStat
Table S1.Summary of sequencing reads aligned with the Sus scrofa genome and annotated genes
Sample name	D54_D67_D74	L6_L7_L12	W17_W20_W21
Total reads	6630604	7171030	6589139
Total mapped	5971028 (90.05%)	5795933 (80.82%)	6194011 (94%)
Multiple mapped	506129 (7.63%)	443548 (6.19%)	582511 (8.84%)
Uniquely mapped	5464899 (82.42%)	5352385 (74.64%)	5611500 (85.16%)
Reads map to '+'	2755767 (41.56%)	2698017 (37.62%)	2864976 (43.48%)
Reads map to '-'	2709132 (40.86%)	2654368 (37.02%)	2746524 (41.68%)
Non-splice reads	4922232 (74.24%)	4216924 (58.8%)	5362346 (81.38%)
Splice reads	542667 (8.18%)	1135461 (15.83%)	249154 (3.78%)
