# Supplementary material for: Comparison of differentially expressed genes in longissimus dorsi muscle of Diannan small ears, Wujin and landrace pigs using RNA-seq
Source: Front Vet Sci. 2024 Jan 5;10:1296208. doi: 10.3389/fvets.2023.1296208 (PMC10796741; doi:10.3389/fvets.2023.1296208)
Supplement: Supplementary file 5 [file Table_2.XLSX]

## Sheet: Sheet1
Table S2. Differentially expressed genes between DSP and WJ
Gene_id	RPKM_D54_D67_D74	RPKM_W17_W20_W21	log2.Fold_change.	p.value	q.value.Storey.et.al..2003.	UP/DOWN regulate
ENSSSCG00000000005	33.1991	7.30795	2.08072	5.88558e-05	0.00050802	Up
ENSSSCG00000000125	892.232	374.741	1.14864	1.37226e-26	8.18869e-25	Up
ENSSSCG00000000185	33.3434	13.3059	1.22245	0.000124765	0.000958934	Up
ENSSSCG00000000190	41.3477	14.7794	1.38134	3.62079e-06	4.30928e-05	Up
ENSSSCG00000000264	19.3196	3.25518	2.46637	3.68801e-05	0.000343716	Up
ENSSSCG00000000292	1.64368	8.41221	-2.45844	0.000630082	0.00374946	Up
ENSSSCG00000000384	18.2666	4.45174	1.93388	0.000259146	0.00179582	Up
ENSSSCG00000000496	26.8179	12.2002	1.03341	0.000488118	0.00306156	Up
ENSSSCG00000000916	5.29184	14.571	-1.56415	7.55154e-05	0.000629995	Up
ENSSSCG00000000975	4.8846	0	4.80872	8.93376e-05	0.000721492	Up
ENSSSCG00000001000	50.7816	23.2882	1.02183	6.62277e-07	9.464e-06	Up
ENSSSCG00000001006	56.7985	26.1294	1.01729	2.68534e-05	0.000256387	Up
ENSSSCG00000001231	62.9881	163.333	-1.47755	3.89994e-17	1.45703e-15	Up
ENSSSCG00000001252	24.94	5.15721	2.17092	2.14539e-05	0.000207136	Up
ENSSSCG00000001533	49.1128	24.4851	0.90131	0.00050514	0.00315451	Up
ENSSSCG00000001683	3.83892	22.9218	-2.68083	7.47407e-15	2.32695e-13	Up
ENSSSCG00000001759	13.0431	38.5688	-1.66703	3.89471e-10	8.40875e-09	Up
ENSSSCG00000001834	54.6294	24.8523	1.03341	1.37989e-06	1.84041e-05	Up
ENSSSCG00000001876	78.4738	31.0432	1.23505	9.11613e-07	1.26345e-05	Up
ENSSSCG00000002032	31.1708	89.67	-1.62732	2.83027e-15	8.87599e-14	Up
ENSSSCG00000002274	36.271	17.5538	0.944146	4.41434e-05	0.000401821	Up
ENSSSCG00000002281	77.4063	25.5989	1.49348	1.04302e-22	5.21077e-21	Up
ENSSSCG00000002452	3.46254	11.0264	-1.77394	0.000660649	0.00388827	Up
ENSSSCG00000002457	10.1198	3.06917	1.61838	0.000737868	0.00428891	Up
ENSSSCG00000002633	9.37992	3.63163	1.26607	0.000355109	0.00232223	Up
ENSSSCG00000002704	90.7913	27.8209	1.6035	1.75546e-17	6.67454e-16	Up
ENSSSCG00000002705	815.047	367.022	1.04814	1.71818e-10	3.90585e-09	Up
ENSSSCG00000002799	4.1394	1.34509	1.51884	0.000129177	0.00098579	Up
ENSSSCG00000003018	13.5964	2.81153	2.17092	9.26873e-07	1.28047e-05	Up
ENSSSCG00000003089	25.6662	4.67048	2.35534	0.000107656	0.000845591	Up
ENSSSCG00000003261	266.363	128.166	0.952494	1.52923e-05	0.00015387	Up
ENSSSCG00000003432	17.1959	5.47599	1.54799	2.33307e-05	0.000223748	Up
ENSSSCG00000003458	13.3264	2.67465	2.21399	1.28811e-05	0.000132716	Up
ENSSSCG00000003524	34.4184	6.02223	2.41193	9.58302e-07	1.31964e-05	Up
ENSSSCG00000003546	288.993	131.47	1.03341	8.15032e-07	1.14063e-05	Up
ENSSSCG00000003566	34.1863	13.2359	1.26607	0.000355109	0.00232223	Up
ENSSSCG00000003593	62.218	12.7882	2.17963	1.26464e-21	5.84241e-20	Up
ENSSSCG00000003594	322.709	89.8828	1.74123	6.06804e-06	6.77169e-05	Up
ENSSSCG00000003634	13.6276	2.58314	2.29645	0.000182929	0.0013187	Up
ENSSSCG00000003645	39.2119	7.689	2.24754	9.11829e-09	1.71075e-07	Up
ENSSSCG00000003766	37.5105	126.968	-1.86198	5.06729e-26	2.82744e-24	Up
ENSSSCG00000003851	10.5929	1.4603	2.75588	1.38359e-06	1.84041e-05	Up
ENSSSCG00000003867	41.8416	11.4865	1.76211	7.05912e-07	1.00096e-05	Up
ENSSSCG00000003901	5.60305	0	4.70918	0.000161409	0.00119566	Up
ENSSSCG00000004071	0.981874	5.95572	-2.70355	0.000649121	0.00383092	Up
ENSSSCG00000004238	6.73963	18.0355	-1.52298	0.000302991	0.0020277	Up
ENSSSCG00000004392	11.1825	36.2464	-1.79948	3.76478e-12	9.8629e-11	Up
ENSSSCG00000004789	0.491352	4.09802	-3.16298	1.39159e-05	0.00014168	Up
ENSSSCG00000004820	17.4328	5.53299	1.55279	8.45183e-05	0.000694317	Up
ENSSSCG00000004862	72.4027	23.527	1.51884	7.73272e-07	1.08573e-05	Up
ENSSSCG00000005021	11.1493	23.6697	-1.18898	0.000532032	0.00326708	Up
ENSSSCG00000005166	20.2067	4.81866	1.96524	8.24336e-15	2.52979e-13	Up
ENSSSCG00000005297	19.3027	84.7211	-2.2368	3.69284e-36	2.55905e-34	Up
ENSSSCG00000005437	3.39033	12.8529	-2.02548	0.000103365	0.000820893	Up
ENSSSCG00000005593	1.10211	4.29754	-2.06612	0.000429635	0.00276332	Up
ENSSSCG00000005621	39.7125	8.54485	2.11358	3.73781e-10	8.11074e-09	Up
ENSSSCG00000005776	5.97609	27.1868	-2.28851	0.000162039	0.00119827	Up
ENSSSCG00000006038	0	3.12093	-4.51227	0.000834364	0.0047418	Up
ENSSSCG00000006066	1.49268	7.07352	-2.34741	3.12709e-08	5.57484e-07	Up
ENSSSCG00000006290	1.56066	8.28313	-2.51091	1.56792e-05	0.000156313	Up
ENSSSCG00000006533	0.316485	5.0392	-4.09587	0.000119171	0.000924621	Up
ENSSSCG00000006623	40.9789	9.32118	2.03341	6.75387e-06	7.47877e-05	Up
ENSSSCG00000006887	2.74102	13.7165	-2.42602	0.000178189	0.00130422	Up
ENSSSCG00000007022	143.167	287.324	-1.10787	7.78788e-94	8.80531e-92	Up
ENSSSCG00000007205	12.7538	2.63728	2.17092	0.000521534	0.00322409	Up
ENSSSCG00000007279	311.497	139.712	1.05388	2.64021e-11	6.44518e-10	Up
ENSSSCG00000007287	3.75486	0.474495	2.88141	0.00027085	0.00185893	Up
ENSSSCG00000007291	8.58015	1.08426	2.88141	0.00027085	0.00185893	Up
ENSSSCG00000007646	163.168	77.7638	0.9663	1.12572e-05	0.000117393	Up
ENSSSCG00000007770	8.42621	0	5.14975	8.79025e-06	9.46536e-05	Up
ENSSSCG00000007927	2.05039	7.38448	-1.95148	2.08381e-05	0.000203477	Up
ENSSSCG00000007942	106.272	34.5328	1.51884	1.59998e-15	5.092e-14	Up
ENSSSCG00000008238	58.6376	27.5956	0.984504	1.6766e-07	2.66793e-06	Up
ENSSSCG00000008268	19.859	4.83984	1.93388	0.000259146	0.00179582	Up
ENSSSCG00000008398	6.42016	13.4801	-1.17304	0.000104035	0.000821653	Up
ENSSSCG00000008468	18.9736	43.1578	-1.28851	8.88908e-06	9.54785e-05	Up
ENSSSCG00000008509	7.00357	1.06203	2.61838	7.22451e-06	7.93854e-05	Up
ENSSSCG00000008559	10.5335	4.79197	1.03341	0.000841628	0.00477046	Up
ENSSSCG00000008571	124.704	51.138	1.18316	8.3523e-21	3.73804e-19	Up
ENSSSCG00000008640	58.5458	23.16	1.23505	2.11873e-05	0.00020595	Up
ENSSSCG00000008701	13.9848	2.89183	2.17092	0.000521534	0.00322409	Up
ENSSSCG00000008774	6.90447	0.682831	3.23505	1.48669e-05	0.000150294	Up
ENSSSCG00000009134	2.18868	19.9138	-3.28851	3.78399e-06	4.49107e-05	Up
ENSSSCG00000009281	88.1081	28.9754	1.50156	9.29394e-08	1.5598e-06	Up
ENSSSCG00000009285	14.4929	0	4.80872	8.93376e-05	0.000721492	Up
ENSSSCG00000009592	3.25499	20.0963	-2.72909	1.26609e-07	2.045e-06	Up
ENSSSCG00000009668	19.9676	4.12899	2.17092	2.14539e-05	0.000207136	Up
ENSSSCG00000009692	10.1975	1.44972	2.71149	0.000853964	0.00481497	Up
ENSSSCG00000009794	6.4956	19.2718	-1.67184	1.89764e-06	2.43377e-05	Up
ENSSSCG00000009974	0.513595	8.17767	-4.09587	0.000119171	0.000924621	Up
ENSSSCG00000010010	10.9337	3.39137	1.58595	5.5051e-05	0.000476862	Up
ENSSSCG00000010067	158.062	77.6261	0.92299	0.000101701	0.000812183	Up
ENSSSCG00000010495	1.13397	8.38292	-2.98895	4.40123e-06	5.09875e-05	Up
ENSSSCG00000010539	44.3417	21.9825	0.909425	0.000295608	0.00200103	Up
ENSSSCG00000010686	106.907	221.145	-1.15151	8.6971e-25	4.72995e-23	Up
ENSSSCG00000010904	1.09023	14.8793	-3.87348	0.000472017	0.00298674	Up
ENSSSCG00000010974	1.0438	16.6198	-4.09587	5.27872e-08	9.03574e-07	Up
ENSSSCG00000011208	1.12468	12.7912	-3.61044	3.69727e-12	9.74548e-11	Up
ENSSSCG00000011265	140.022	1828.91	-3.81014	0	0	Up
ENSSSCG00000011356	100.719	33.3235	1.49285	6.39523e-14	1.83178e-12	Up
ENSSSCG00000011378	20.918	7.3201	1.41193	0.00044808	0.00285207	Up
ENSSSCG00000011397	18.0024	4.54985	1.88141	5.28831e-06	6.01083e-05	Up
ENSSSCG00000011414	2.92486	26.6118	-3.28851	0.000160276	0.00119138	Up
ENSSSCG00000011424	18.5403	3.66716	2.23505	0.000309564	0.00205568	Up
ENSSSCG00000011494	45.8414	14.896	1.51884	0.000129177	0.00098579	Up
ENSSSCG00000011500	9.80768	21.3173	-1.22293	1.07706e-05	0.000113978	Up
ENSSSCG00000011646	25.3519	55.0918	-1.22263	3.88299e-12	1.01109e-10	Up
ENSSSCG00000012068	4.67694	27.3556	-2.65108	4.23852e-07	6.25792e-06	Up
ENSSSCG00000012160	0.42304	4.33016	-3.45844	4.22645e-05	0.000387721	Up
ENSSSCG00000012345	9.11894	27.6563	-1.70355	1.53673e-05	0.000154264	Up
ENSSSCG00000012583	14.4941	6.32277	1.09396	6.09408e-05	0.000522612	Up
ENSSSCG00000012653	29.0406	4.45324	2.60226	1.31716e-14	3.92994e-13	Up
ENSSSCG00000012654	19.0202	7.78749	1.18542	0.000439163	0.00281198	Up
ENSSSCG00000012681	69.007	27.6997	1.21399	3.04847e-05	0.00028913	Up
ENSSSCG00000012686	17.6522	7.13818	1.20334	0.000749329	0.00430408	Up
ENSSSCG00000012784	158.97	65.0876	1.18542	6.64223e-07	9.464e-06	Up
ENSSSCG00000012841	97.6077	44.2033	1.03996	1.76939e-11	4.39426e-10	Up
ENSSSCG00000012874	27.878	8.6471	1.58595	5.5051e-05	0.000476862	Up
ENSSSCG00000012896	20.3233	5.60338	1.75588	0.000189499	0.00135245	Up
ENSSSCG00000012956	10.8253	3.91738	1.36356	0.000273079	0.00186826	Up
ENSSSCG00000012957	4.11027	0	4.60227	0.000293145	0.00199013	Up
ENSSSCG00000012965	128.995	39.3237	1.61096	1.44247e-09	2.93719e-08	Up
ENSSSCG00000012996	10.1308	28.8048	-1.61044	0.000158382	0.00118757	Up
ENSSSCG00000013003	65.0062	24.6441	1.29645	1.20478e-06	1.63806e-05	Up
ENSSSCG00000013179	2.56798	15.1871	-2.66703	1.60795e-05	0.000159549	Up
ENSSSCG00000013240	34.2222	10.2425	1.63749	0.000129168	0.00098579	Up
ENSSSCG00000013259	9.55243	3.53715	1.3304	0.000404884	0.00261195	Up
ENSSSCG00000013432	11.6931	24.5515	-1.17304	0.000104035	0.000821653	Up
ENSSSCG00000013467	80.2175	27.9973	1.41575	9.81421e-15	2.94868e-13	Up
ENSSSCG00000013513	12.3067	1.16638	3.29645	8.29254e-06	9.04274e-05	Up
ENSSSCG00000013573	286.411	142.511	0.904131	1.56894e-08	2.89307e-07	Up
ENSSSCG00000013599	14.5141	4.46136	1.59901	0.000200379	0.00142065	Up
ENSSSCG00000013622	29.057	6.00854	2.17092	0.000521534	0.00322409	Up
ENSSSCG00000013644	5.99628	2.16989	1.36356	0.000273079	0.00186826	Up
ENSSSCG00000013645	3.96611	0	5.22375	4.97662e-06	5.67156e-05	Up
ENSSSCG00000013735	27.9014	5.9873	2.11748	1.11193e-07	1.83745e-06	Up
ENSSSCG00000013757	127.773	62.5986	0.926499	2.16786e-06	2.73141e-05	Up
ENSSSCG00000013891	122.777	57.2279	0.998367	1.24303e-06	1.67418e-05	Up
ENSSSCG00000013906	108.123	38.8325	1.37445	1.02981e-11	2.61807e-10	Up
ENSSSCG00000013919	107.869	41.4049	1.27853	3.23971e-11	7.77611e-10	Up
ENSSSCG00000014113	28.2027	77.7756	-1.56637	3.96292e-22	1.89183e-20	Up
ENSSSCG00000014217	1.15253	9.17554	-3.09587	0.000603828	0.00362334	Up
ENSSSCG00000014903	2.22187	7.8106	-1.91655	7.08513e-05	0.000594547	Up
ENSSSCG00000015014	0.718462	6.53693	-3.28851	0.000160276	0.00119138	Up
ENSSSCG00000015066	38.9663	12.662	1.51884	6.17338e-08	1.05252e-06	Up
ENSSSCG00000015227	57.2973	23.9688	1.15443	1.23646e-10	2.85612e-09	Up
ENSSSCG00000015242	9.89327	1.0716	3.1038	4.76587e-05	0.000427479	Up
ENSSSCG00000015249	20.3233	0.700423	4.75588	2.31388e-16	8.14874e-15	Up
ENSSSCG00000015541	8.93656	31.6203	-1.92594	0.000296211	0.00200103	Up
ENSSSCG00000015570	43.7002	16.5669	1.29645	2.89345e-06	3.50184e-05	Up
ENSSSCG00000015595	31.9421	379.309	-3.67273	3.47009e-153	5.73424e-151	Up
ENSSSCG00000015613	33.9533	6.26198	2.33598	2.73342e-06	3.35542e-05	Up
ENSSSCG00000015871	0.505682	4.60095	-3.28851	0.000160276	0.00119138	Up
ENSSSCG00000015986	10.7399	2.3266	2.1038	0.000874379	0.00489156	Up
ENSSSCG00000016034	15.841	42.4997	-1.52667	8.22898e-15	2.52979e-13	Up
ENSSSCG00000016041	15.0066	4.61275	1.59901	0.000200379	0.00142065	Up
ENSSSCG00000016216	22.1757	77.8239	-1.91412	1.49101e-12	4.00377e-11	Up
ENSSSCG00000016349	65.6905	30.6191	0.998367	1.24303e-06	1.67418e-05	Up
ENSSSCG00000016466	25.0771	6.91406	1.75588	0.000189499	0.00135245	Up
ENSSSCG00000016498	32.1994	13.2532	1.1778	3.9593e-07	5.90656e-06	Up
ENSSSCG00000016518	12.2827	4.29823	1.41193	0.00044808	0.00285207	Up
ENSSSCG00000016605	43.9259	89.2575	-1.12578	3.35211e-07	5.05338e-06	Up
ENSSSCG00000016723	6.63188	2.90097	1.09	0.000738703	0.00428891	Up
ENSSSCG00000016734	27.2099	11.1406	1.18542	0.000439163	0.00281198	Up
ENSSSCG00000017105	32.7689	15.3458	0.991594	0.000316036	0.00209219	Up
ENSSSCG00000017131	42.5258	16.6255	1.25205	3.55134e-05	0.000334608	Up
ENSSSCG00000017209	72.027	28.912	1.21399	3.27291e-07	4.95137e-06	Up
ENSSSCG00000017386	23.9398	11.6169	0.940304	0.000275223	0.00187993	Up
ENSSSCG00000017406	25.5811	12.5973	0.919081	4.74957e-05	0.000427479	Up
ENSSSCG00000017558	94.8597	234.809	-1.4105	1.33101e-15	4.33228e-14	Up
ENSSSCG00000017583	25.4543	9.81341	1.2722	5.94298e-05	0.000510673	Up
ENSSSCG00000017793	2.46971	11.2354	-2.28851	0.000574849	0.00347371	Up
ENSSSCG00000017803	10.402	0	4.70918	0.000161409	0.00119566	Up
ENSSSCG00000017885	132.807	49.8773	1.30999	1.17111e-21	5.46912e-20	Up
ENSSSCG00000017906	37.0699	18.0406	0.936117	8.31087e-10	1.71669e-08	Up
ENSSSCG00000017983	6.14294	18.6305	-1.70355	2.38473e-08	4.30498e-07	Up
ENSSSCG00000018034	67.0564	14.2995	2.12652	3.56029e-05	0.000334717	Up
ENSSSCG00000018073	806.773	367.022	1.03341	0.000841628	0.00477046	Up
ENSSSCG00000018075	63370.7	29401.6	1.00504	0	0	Up
ENSSSCG00000018076	31779.8	10883	1.44315	1.45226e-162	2.59981e-160	Up
ENSSSCG00000020657	16.2149	41.9453	-1.47407	2.08447e-09	4.16548e-08	Up
ENSSSCG00000020769	69.4943	32.7049	0.984504	2.87402e-06	3.48815e-05	Up
ENSSSCG00000020803	5.2741	14.246	-1.53644	0.000390609	0.00253509	Up
ENSSSCG00000020940	1.44833	5.49068	-2.02548	0.000103365	0.000820893	Up
ENSSSCG00000020965	3.58376	0.776354	2.1038	0.000874379	0.00489156	Up
ENSSSCG00000021038	2.23135	22.2053	-3.4178	9.46667e-16	3.10481e-14	Up
ENSSSCG00000021084	67.3788	8.06641	2.95941	0.000152028	0.00114593	Up
ENSSSCG00000021155	13.2499	0	4.80872	8.93376e-05	0.000721492	Up
ENSSSCG00000021429	1.11775	4.7217	-2.1816	0.000142579	0.0010823	Up
ENSSSCG00000021595	17.627	86.358	-2.39543	2.9826e-09	5.8248e-08	Up
ENSSSCG00000021814	0	2.90136	-4.51227	0.000834364	0.0047418	Up
ENSSSCG00000022058	30.1727	9.46643	1.56947	4.25765e-06	4.9844e-05	Up
ENSSSCG00000022075	8.82121	0	4.48679	0.000535332	0.00326708	Up
ENSSSCG00000022187	93.9653	25.9074	1.75588	0.000189499	0.00135245	Up
ENSSSCG00000022300	11.3039	32.3477	-1.61972	1.16402e-07	1.90158e-06	Up
ENSSSCG00000022404	6.65556	18.6325	-1.58807	0.000833191	0.0047418	Up
ENSSSCG00000022457	16.486	7.3275	1.06697	1.72266e-05	0.000170537	Up
ENSSSCG00000022748	29.5289	110.346	-2.00472	1.81562e-06	2.35671e-05	Up
ENSSSCG00000022913	34.0547	3.68866	3.1038	4.76587e-05	0.000427479	Up
ENSSSCG00000023263	109.44	51.0639	0.996888	2.10487e-06	2.65984e-05	Up
ENSSSCG00000023287	105.889	0	6.87911	1.54949e-15	4.96811e-14	Up
ENSSSCG00000023513	301.195	150.304	0.899931	8.19024e-16	2.72782e-14	Up
ENSSSCG00000023680	10.611	3.44801	1.51884	2.75378e-06	3.37078e-05	Up
ENSSSCG00000023784	3.19035	10.5554	-1.82908	0.000195387	0.00139216	Up
ENSSSCG00000024087	111.782	265.317	-1.34991	9.6376e-86	1.06173e-83	Up
ENSSSCG00000024115	12.3643	4.99987	1.20334	1.86816e-06	2.41034e-05	Up
ENSSSCG00000024219	10.0847	1.76453	2.41193	6.31197e-05	0.000533839	Up
ENSSSCG00000024260	143.998	67.2629	0.995279	3.56721e-06	4.26916e-05	Up
ENSSSCG00000024342	3.49785	0.442017	2.88141	0.00027085	0.00185893	Up
ENSSSCG00000024398	0	13.792	-4.7753	0.000210928	0.00149298	Up
ENSSSCG00000024405	16.8696	0	5.07175	1.55906e-05	0.00015614	Up
ENSSSCG00000024752	9.28659	20.3691	-1.23605	0.000431136	0.00276884	Up
ENSSSCG00000025284	287.666	140.384	0.93213	1.25746e-22	6.20989e-21	Up
ENSSSCG00000025343	13.95	5.64106	1.20334	0.000749329	0.00430408	Up
ENSSSCG00000025698	0.478088	11.9622	-4.74795	5.39579e-07	7.83199e-06	Up
ENSSSCG00000025791	10.1396	1.8451	2.35534	0.000107656	0.000845591	Up
ENSSSCG00000025831	30.6929	94.6643	-1.7278	1.46826e-15	4.74308e-14	Up
ENSSSCG00000025941	9.62114	24.6201	-1.45844	1.68525e-07	2.67181e-06	Up
ENSSSCG00000026113	0.781	3.90826	-2.42602	0.000178189	0.00130422	Up
ENSSSCG00000026533	105.231	417.645	-2.0916	8.67438e-60	8.28199e-58	Up
ENSSSCG00000026644	8.9409	3.56793	1.22245	0.000124765	0.000958934	Up
ENSSSCG00000026946	9.47287	43.0945	-2.28851	0.000574849	0.00347371	Up
ENSSSCG00000027130	60.7929	183.223	-1.69451	1.56869e-10	3.60415e-09	Up
ENSSSCG00000027135	29.9287	13.8126	1.01266	0.000229131	0.00161121	Up
ENSSSCG00000027168	289.705	133.462	1.01527	7.81706e-05	0.000649624	Up
ENSSSCG00000027428	66.945	140.561	-1.17304	7.41497e-06	8.12704e-05	Up
ENSSSCG00000027441	67.2131	17.6406	1.82696	1.54615e-06	2.03771e-05	Up
ENSSSCG00000027516	59.6207	25.8314	1.1038	1.50054e-05	0.000151337	Up
ENSSSCG00000027669	20.8088	49.6988	-1.3589	1.89717e-06	2.43377e-05	Up
ENSSSCG00000027969	66.3711	133.632	-1.11252	2.27071e-43	1.74214e-41	Up
ENSSSCG00000028033	15.8927	5.02081	1.55948	0.000309309	0.00205568	Up
ENSSSCG00000028040	26.9605	5.57501	2.17092	0.000521534	0.00322409	Up
ENSSSCG00000028045	42.0742	15.3125	1.35534	4.65554e-08	8.06543e-07	Up
ENSSSCG00000028326	13.8568	67.2406	-2.38162	2.63115e-10	5.8271e-09	Up
ENSSSCG00000028828	4.23791	14.995	-1.92594	3.09608e-07	4.7004e-06	Up
ENSSSCG00000028889	7.07489	16.0927	-1.28851	0.000444545	0.00283854	Up
ENSSSCG00000029059	26.2001	13.082	0.899113	0.000233664	0.00163506	Up
ENSSSCG00000029156	20.9406	8.50571	1.19691	0.000179649	0.00131045	Up
ENSSSCG00000029162	20.4151	8.2554	1.20334	0.000749329	0.00430408	Up
ENSSSCG00000029226	1330.12	562.216	1.13947	6.03373e-114	7.62458e-112	Up
ENSSSCG00000029328	6.54416	0.930346	2.71149	0.000853964	0.00481497	Up
ENSSSCG00000029609	11.1386	0	4.48679	0.000535332	0.00326708	Up
ENSSSCG00000029849	2.52775	17.2491	-2.87348	0.000182851	0.0013187	Up
ENSSSCG00000029877	15.6928	3.66106	1.99689	1.10049e-05	0.000115041	Up
ENSSSCG00000030165	14.9892	48.134	-1.78601	2.32755e-10	5.23569e-09	Up
ENSSSCG00000030174	26.2959	7.97512	1.61838	1.81357e-06	2.35671e-05	Up
ENSSSCG00000030278	33.4948	7.32578	2.09	1.82021e-07	2.86462e-06	Up
ENSSSCG00000030601	1.74595	7.28086	-2.16298	0.000503821	0.00315086	Up
ENSSSCG00000030642	9.03525	1.02759	3.03341	8.51829e-05	0.000698442	Up
ENSSSCG00000030673	23.4698	3.33656	2.71149	0.000853964	0.00481497	Up
ENSSSCG00000000268	10.7089	0.51827	4.26607	1.22573e-11	3.07969e-10	Down
ENSSSCG00000000675	20.4299	5.69026	1.74123	6.06804e-06	6.77169e-05	Down
ENSSSCG00000000743	111.734	52.5834	0.984504	8.43945e-15	2.5716e-13	Down
ENSSSCG00000001076	26.2479	9.0854	1.42769	2.86535e-11	6.95526e-10	Down
ENSSSCG00000001134	2.54102	34.6792	-3.87348	0.000472017	0.00298674	Down
ENSSSCG00000001227	23.6954	48.7651	-1.14412	9.65516e-05	0.000775866	Down
ENSSSCG00000001413	30.8813	10.5365	1.44845	9.40103e-06	0.000100475	Down
ENSSSCG00000001453	50.1647	23.527	0.98947	1.74638e-05	0.000172488	Down
ENSSSCG00000001487	17.2789	39.3031	-1.28851	4.2066e-05	0.000387011	Down
ENSSSCG00000001512	113.056	53.2058	0.984504	5.06442e-05	0.000447716	Down
ENSSSCG00000001550	18.0337	0	5.14975	8.79025e-06	9.46536e-05	Down
ENSSSCG00000001564	30.3171	68.9602	-1.28851	2.45208e-06	3.06257e-05	Down
ENSSSCG00000001688	8.57834	0.929168	3.1038	4.76587e-05	0.000427479	Down
ENSSSCG00000001701	59.2731	29.0797	0.924479	5.32047e-17	1.95377e-15	Down
ENSSSCG00000002013	42.4474	11.1406	1.82696	1.54615e-06	2.03771e-05	Down
ENSSSCG00000002127	3.11603	0.545216	2.41193	6.31197e-05	0.000533839	Down
ENSSSCG00000002366	68.2409	27.5629	1.20503	1.95911e-07	3.07198e-06	Down
ENSSSCG00000003160	34.1405	9.24487	1.78187	2.13131e-05	0.000206705	Down
ENSSSCG00000003253	8.05588	30.1809	-2.00841	1.34147e-07	2.15864e-06	Down
ENSSSCG00000003691	66.4314	22.1623	1.48087	4.93887e-07	7.24217e-06	Down
ENSSSCG00000003904	8.79716	3.00154	1.44845	0.00029749	0.00200651	Down
ENSSSCG00000004104	18.2269	4.78377	1.82696	0.000679421	0.00398783	Down
ENSSSCG00000004203	0.473875	3.77261	-3.09587	0.000603828	0.00362334	Down
ENSSSCG00000004275	1.96342	0	4.48679	0.000535332	0.00326708	Down
ENSSSCG00000004339	2.43359	7.54843	-1.73597	0.000525155	0.00323716	Down
ENSSSCG00000004729	11.4281	4.64192	1.19691	0.000179649	0.00131045	Down
ENSSSCG00000004919	8.13883	2.09016	1.85833	1.13732e-07	1.87219e-06	Down
ENSSSCG00000005003	326.002	161.04	0.914577	7.01388e-09	1.33339e-07	Down
ENSSSCG00000005212	43.7297	13.8151	1.55948	0.000309309	0.00205568	Down
ENSSSCG00000005249	48.1343	22.8496	0.972013	3.9146e-06	4.62057e-05	Down
ENSSSCG00000005320	7.4648	1.30613	2.41193	6.31197e-05	0.000533839	Down
ENSSSCG00000005477	2.6707	0	4.48679	0.000535332	0.00326708	Down
ENSSSCG00000005528	241.44	113.068	0.991594	4.41049e-10	9.3809e-09	Down
ENSSSCG00000005663	11.7112	2.21989	2.29645	0.000182929	0.0013187	Down
ENSSSCG00000005706	3.57374	9.75472	-1.55155	5.88846e-05	0.00050802	Down
ENSSSCG00000005715	3.21429	6.49895	-1.11859	0.000455282	0.00289363	Down
ENSSSCG00000005787	5.90772	0	4.90183	4.96927e-05	0.000441119	Down
ENSSSCG00000005849	242.314	116.644	0.951884	1.49546e-18	6.23803e-17	Down
ENSSSCG00000006036	99.9498	345.172	-1.89092	4.15284e-43	3.13025e-41	Down
ENSSSCG00000006049	7.25989	0.971385	2.79895	0.00048153	0.00303551	Down
ENSSSCG00000006166	104.609	47.1404	1.04709	2.87173e-06	3.48815e-05	Down
ENSSSCG00000006360	9.33778	4.17214	1.05941	0.000602408	0.00362334	Down
ENSSSCG00000006363	66.8956	31.7005	0.97452	0.000252995	0.00176171	Down
ENSSSCG00000006707	7.97907	1.86148	1.99689	1.10049e-05	0.000115041	Down
ENSSSCG00000006729	0	7.56745	-4.9977	5.47306e-05	0.000476006	Down
ENSSSCG00000006924	12.0163	2.21616	2.33598	2.73342e-06	3.35542e-05	Down
ENSSSCG00000006968	1.42972	6.50418	-2.28851	4.61983e-05	0.000418752	Down
ENSSSCG00000006993	2.14425	19.5094	-3.28851	0.000160276	0.00119138	Down
ENSSSCG00000007425	57.8841	24.5967	1.13182	4.48285e-06	5.17751e-05	Down
ENSSSCG00000007851	6.59188	0	4.80872	8.93376e-05	0.000721492	Down
ENSSSCG00000007854	1.54099	8.76295	-2.61044	0.000186948	0.00134317	Down
ENSSSCG00000008195	638.606	226.604	1.39187	1.46487e-35	9.99003e-34	Down
ENSSSCG00000008368	69.152	29.2894	1.13651	2.12808e-16	7.55635e-15	Down
ENSSSCG00000008412	62.1814	27.6223	1.06777	1.98235e-21	9.06071e-20	Down
ENSSSCG00000009110	648.379	276.108	1.12872	1.21949e-12	3.31613e-11	Down
ENSSSCG00000009310	485.004	179.591	1.3304	4.55095e-18	1.81045e-16	Down
ENSSSCG00000009370	4.81177	12.7691	-1.51091	2.04896e-06	2.60451e-05	Down
ENSSSCG00000009511	30.0998	14.0299	0.998367	1.24303e-06	1.67418e-05	Down
ENSSSCG00000009773	66.2991	27.2541	1.17963	6.37789e-06	7.09903e-05	Down
ENSSSCG00000009781	1.33277	6.66944	-2.42602	1.15408e-07	1.89254e-06	Down
ENSSSCG00000009930	24.0565	6.67312	1.74711	3.36559e-05	0.000318503	Down
ENSSSCG00000010026	17.1174	4.5274	1.81582	1.34432e-05	0.000137847	Down
ENSSSCG00000010134	30.7903	8.03697	1.83487	1.8028e-07	2.84766e-06	Down
ENSSSCG00000010143	0.576266	2.88374	-2.42602	0.000178189	0.00130422	Down
ENSSSCG00000010219	3.39648	33.28	-3.39543	1.42605e-46	1.13462e-44	Down
ENSSSCG00000010313	19.8176	41.7386	-1.17748	8.55566e-11	2.00868e-09	Down
ENSSSCG00000010319	4.23448	11.4155	-1.53363	4.31519e-06	5.03804e-05	Down
ENSSSCG00000010461	112.105	880.067	-3.07565	1.77891e-246	4.77685e-244	Down
ENSSSCG00000010526	58.9058	21.0908	1.37891	9.10486e-09	1.71075e-07	Down
ENSSSCG00000010565	43.7178	17.2942	1.23505	2.11873e-05	0.00020595	Down
ENSSSCG00000010759	50.5239	16.9005	1.47702	1.7548e-06	2.30563e-05	Down
ENSSSCG00000010831	11.7879	27.678	-1.33432	4.23245e-05	0.000387721	Down
ENSSSCG00000010849	11.3801	23.3904	-1.14229	4.49987e-08	7.89119e-07	Down
ENSSSCG00000010973	137.051	62.3479	1.03341	4.81762e-07	7.08857e-06	Down
ENSSSCG00000010993	7.74115	1.10051	2.71149	0.000853964	0.00481497	Down
ENSSSCG00000011076	22.6982	172.848	-3.03174	2.14834e-29	1.35739e-27	Down
ENSSSCG00000011106	4.44605	96.9173	-4.54904	5.27891e-58	4.93055e-56	Down
ENSSSCG00000011243	6.01831	1.55562	1.84899	8.44704e-06	9.1647e-05	Down
ENSSSCG00000011264	2.13445	13.8717	-2.80309	3.74053e-08	6.59598e-07	Down
ENSSSCG00000011411	19.3798	7.83676	1.20334	0.000749329	0.00430408	Down
ENSSSCG00000011498	22.9357	6.86449	1.63749	0.000129168	0.00098579	Down
ENSSSCG00000011623	10.8953	2.36027	2.1038	0.000874379	0.00489156	Down
ENSSSCG00000011831	76.0736	29.8699	1.24582	2.45752e-11	6.06815e-10	Down
ENSSSCG00000012022	10.6607	31.0693	-1.64607	3.74594e-08	6.59598e-07	Down
ENSSSCG00000012050	26.9269	162.074	-2.69241	4.5256e-56	4.13702e-54	Down
ENSSSCG00000012122	17.8015	3.11475	2.41193	6.31197e-05	0.000533839	Down
ENSSSCG00000012290	56.731	21.0394	1.32816	2.37315e-07	3.65451e-06	Down
ENSSSCG00000012978	15.6994	1.9839	2.88141	2.83325e-10	6.23299e-09	Down
ENSSSCG00000013176	30.8863	13.3242	1.11004	0.000304434	0.00203103	Down
ENSSSCG00000013293	65.7566	19.8228	1.62709	1.76168e-08	3.23459e-07	Down
ENSSSCG00000013366	2541.98	5227.28	-1.14299	0	0	Down
ENSSSCG00000013405	19.3625	41.1545	-1.19067	7.46527e-07	1.05161e-05	Down
ENSSSCG00000013524	89.0981	37.0729	1.16215	9.0611e-06	9.70835e-05	Down
ENSSSCG00000013755	10.2113	0	5.29414	2.82874e-06	3.45271e-05	Down
ENSSSCG00000013784	14.8372	0	5.22375	4.97662e-06	5.67156e-05	Down
ENSSSCG00000013927	16.1081	2.24326	2.74123	4.43504e-09	8.62212e-08	Down
ENSSSCG00000014133	445.012	202.447	1.03341	1.827e-12	4.87553e-11	Down
ENSSSCG00000014156	6.83867	50.8144	-2.99633	1.57718e-36	1.12938e-34	Down
ENSSSCG00000014827	18.1058	4.84517	1.79895	0.000119224	0.000924621	Down
ENSSSCG00000014908	13.8057	0	4.90183	4.96927e-05	0.000441119	Down
ENSSSCG00000015283	3.96665	0.60151	2.61838	7.22451e-06	7.93854e-05	Down
ENSSSCG00000015326	10.4611	21.6319	-1.15101	6.8976e-06	7.61829e-05	Down
ENSSSCG00000015334	115.589	646.814	-2.58723	0	0	Down
ENSSSCG00000015402	1.26354	9.77191	-3.05405	1.10371e-07	1.83745e-06	Down
ENSSSCG00000015444	0.805029	3.66228	-2.28851	0.000574849	0.00347371	Down
ENSSSCG00000015586	13.5207	5.85802	1.1038	0.000177781	0.00130422	Down
ENSSSCG00000015769	36.3332	10.3306	1.71149	9.50482e-06	0.000101332	Down
ENSSSCG00000015835	695.776	342.448	0.919855	2.08579e-51	1.86697e-49	Down
ENSSSCG00000015997	9.94651	1.25692	2.88141	0.00027085	0.00185893	Down
ENSSSCG00000016017	13.8145	6.58865	0.965242	0.000746874	0.00430408	Down
ENSSSCG00000016214	9.93291	0	4.80872	8.93376e-05	0.000721492	Down
ENSSSCG00000016220	16.4089	4.30664	1.82696	0.000679421	0.00398783	Down
ENSSSCG00000016530	250.574	116.583	1.00099	5.10631e-24	2.74237e-22	Down
ENSSSCG00000016548	5.23843	12.6602	-1.37598	1.47884e-05	0.000149852	Down
ENSSSCG00000016578	126.877	299.199	-1.34056	3.77814e-161	6.49302e-159	Down
ENSSSCG00000016772	5.95683	1.29044	2.1038	0.000874379	0.00489156	Down
ENSSSCG00000016792	22.1556	105.748	-2.35778	1.40988e-70	1.44226e-68	Down
ENSSSCG00000016888	3.3785	12.808	-2.02548	0.000103365	0.000820893	Down
ENSSSCG00000016929	10.794	31.0515	-1.62732	2.83027e-15	8.87599e-14	Down
ENSSSCG00000017277	11.9568	3.39966	1.71149	0.000299713	0.00201521	Down
ENSSSCG00000017395	8.99747	2.72878	1.61838	0.000737868	0.00428891	Down
ENSSSCG00000017549	140.034	53.8857	1.27491	1.35864e-17	5.2119e-16	Down
ENSSSCG00000017639	68.0382	22.5694	1.48909	5.39015e-05	0.0004707	Down
ENSSSCG00000017772	35.5326	17.4081	0.926499	0.000809372	0.00462423	Down
ENSSSCG00000017783	6.89549	23.527	-1.87348	2.08423e-07	3.23277e-06	Down
ENSSSCG00000017891	29.9239	4.00387	2.79895	0.00048153	0.00303551	Down
ENSSSCG00000017957	18.0646	3.04372	2.46637	3.68801e-05	0.000343716	Down
ENSSSCG00000018084	13991.8	5527.53	1.23699	3.17338e-289	9.73875e-287	Down
ENSSSCG00000020149	6599.72	13241.6	-1.10748	1.50171e-77	1.57367e-75	Down
ENSSSCG00000020701	55.9691	15.7821	1.72346	1.71734e-23	8.78387e-22	Down
ENSSSCG00000020785	8913.1	3323.82	1.3202	0	0	Down
ENSSSCG00000020906	7.75992	1.41207	2.35534	0.000107656	0.000845591	Down
ENSSSCG00000020972	77.9786	35.8621	1.01773	1.71572e-09	3.46079e-08	Down
ENSSSCG00000020979	41.4067	103.155	-1.41976	0.000254719	0.00177085	Down
ENSSSCG00000021169	6.9799	2.36461	1.45872	8.14151e-05	0.000673979	Down
ENSSSCG00000021356	213565	797518	-2.00372	0	0	Down
ENSSSCG00000021411	19.7577	52.8722	-1.52298	0.000302991	0.0020277	Down
ENSSSCG00000021461	93.4744	32.9054	1.40336	2.89972e-07	4.43362e-06	Down
ENSSSCG00000021586	12.3083	26.2471	-1.1954	0.000314712	0.00208664	Down
ENSSSCG00000021620	69.152	30.88	1.06021	4.73581e-09	9.16537e-08	Down
ENSSSCG00000021646	22.4945	46.2467	-1.14266	9.02903e-10	1.84727e-08	Down
ENSSSCG00000022289	4.86038	0	4.90183	4.96927e-05	0.000441119	Down
ENSSSCG00000022301	578.978	178.884	1.5916	2.25401e-36	1.58758e-34	Down
ENSSSCG00000022507	25.0589	9.73163	1.26168	0.000876414	0.00489657	Down
ENSSSCG00000022584	0.985538	5.97795	-2.70355	0.000649121	0.00383092	Down
ENSSSCG00000023053	20.0527	6.36453	1.55279	8.45183e-05	0.000694317	Down
ENSSSCG00000023379	9.44514	0	4.48679	0.000535332	0.00326708	Down
ENSSSCG00000023747	23.4409	9.10329	1.26168	8.24003e-09	1.55959e-07	Down
ENSSSCG00000023998	77.7784	29.1129	1.31483	1.7814e-16	6.43168e-15	Down
ENSSSCG00000024072	176.254	87.0196	0.915358	3.48448e-35	2.3392e-33	Down
ENSSSCG00000024235	30.4781	8.15603	1.79895	2.44708e-06	3.06257e-05	Down
ENSSSCG00000024363	21.6777	9.86175	1.03341	6.73149e-06	7.47325e-05	Down
ENSSSCG00000024437	118.233	39.384	1.48307	2.55823e-19	1.11023e-17	Down
ENSSSCG00000024517	15.0668	31.8803	-1.18418	3.6986e-05	0.000343957	Down
ENSSSCG00000024527	2.63735	10.9981	-2.16298	8.66871e-07	1.20924e-05	Down
ENSSSCG00000024578	0.248748	3.39485	-3.87348	0.000472017	0.00298674	Down
ENSSSCG00000024791	132.004	43.586	1.49576	3.9647e-34	2.58093e-32	Down
ENSSSCG00000024853	84428	191606	-1.28523	0	0	Down
ENSSSCG00000024866	2.88133	13.9272	-2.37598	4.24858e-06	4.9844e-05	Down
ENSSSCG00000025136	1.77508	8.07528	-2.28851	0.000574849	0.00347371	Down
ENSSSCG00000025162	448902	1.87494e+06	-2.16525	0	0	Down
ENSSSCG00000025534	17.4506	6.90323	1.23505	0.000517142	0.00321544	Down
ENSSSCG00000025814	49.703	19.6619	1.23505	0.000517142	0.00321544	Down
ENSSSCG00000025883	412.302	189.941	1.01527	3.79133e-22	1.83025e-20	Down
ENSSSCG00000026034	4.02033	0.703443	2.41193	6.31197e-05	0.000533839	Down
ENSSSCG00000026229	89.5776	11.7551	2.82696	8.54794e-10	1.75721e-08	Down
ENSSSCG00000026249	148.943	374.721	-1.43394	5.02463e-11	1.19271e-09	Down
ENSSSCG00000026453	6.90041	18.0502	-1.49015	0.000141088	0.00107288	Down
ENSSSCG00000026731	29.0221	12.6528	1.09481	2.70094e-07	4.14444e-06	Down
ENSSSCG00000026931	55.1295	134.575	-1.39039	6.65231e-07	9.464e-06	Down
ENSSSCG00000027121	22.3679	6.52289	1.67496	8.28701e-05	0.000683391	Down
ENSSSCG00000027307	51.3401	18.5364	1.36684	1.28673e-05	0.000132716	Down
ENSSSCG00000027341	0.320944	2.5551	-3.09587	0.000603828	0.00362334	Down
ENSSSCG00000027344	61.0531	130.937	-1.20363	0.000143676	0.00108871	Down
ENSSSCG00000027629	22.1521	4.66553	2.14445	6.77518e-08	1.15056e-06	Down
ENSSSCG00000027847	22.7637	0	4.98929	2.77715e-05	0.000264565	Down
ENSSSCG00000027864	21.6583	48.4436	-1.26427	1.11159e-07	1.83745e-06	Down
ENSSSCG00000027873	0.338743	3.08206	-3.28851	0.000160276	0.00119138	Down
ENSSSCG00000028235	13.2893	0	5.22375	4.97662e-06	5.67156e-05	Down
ENSSSCG00000028322	61.1828	202.203	-1.82749	1.86288e-48	1.60062e-46	Down
ENSSSCG00000028552	9.56175	0.98861	3.17092	2.84267e-09	5.57688e-08	Down
ENSSSCG00000028856	19.0508	7.31604	1.27783	4.20187e-06	4.94605e-05	Down
ENSSSCG00000028943	28.1296	5.33203	2.29645	0.000182929	0.0013187	Down
ENSSSCG00000029715	23.3724	4.15339	2.38956	4.2271e-10	9.03556e-09	Down
ENSSSCG00000029990	45.9191	8.70407	2.29645	0.000182929	0.0013187	Down
ENSSSCG00000030143	3.10962	11.0028	-1.92594	0.000296211	0.00200103	Down
ENSSSCG00000030149	205.1	96.2412	0.988714	1.6883e-13	4.74096e-12	Down
ENSSSCG00000030284	36.2401	7.85073	2.1038	2.51786e-06	3.12655e-05	Down
ENSSSCG00000030395	92.7765	284.989	-1.72196	5.41573e-79	5.81709e-77	Down
ENSSSCG00000030707	13.7279	1.41935	3.17092	2.84267e-09	5.57688e-08	Down
ENSSSCG00000030708	18.3775	40.1299	-1.22962	2.97809e-06	3.59416e-05	Down
