# Supplementary material for: Comparison of differentially expressed genes in longissimus dorsi muscle of Diannan small ears, Wujin and landrace pigs using RNA-seq
Source: Front Vet Sci. 2024 Jan 5;10:1296208. doi: 10.3389/fvets.2023.1296208 (PMC10796741; doi:10.3389/fvets.2023.1296208)
Supplement: Supplementary file 6 [file Table_3.XLSX]

## Sheet: Sheet1
Table S3. Differentially expressed genes between LP and DSP
Gene_id	RPKM_L6_L7_L12	RPKM_D54_D67_D74	log2.Fold_change.	p.value	q.value.Storey.et.al..2003.	UP/DOWN regulate
ENSSSCG00000000114	22.3873	6.88569	1.90367	1.94131e-05	0.000325558	Up
ENSSSCG00000000214	2136.24	1027.09	1.25917	2.07988e-117	3.79905e-115	Up
ENSSSCG00000000606	256.683	110.977	1.41239	3.38146e-10	1.07797e-08	Up
ENSSSCG00000000735	10.9729	3.72267	1.7622	7.92161e-05	0.00114886	Up
ENSSSCG00000000985	16.117	4.33749	2.09632	8.80014e-07	1.9436e-05	Up
ENSSSCG00000001005	154.817	52.0499	1.77525	8.2095e-06	0.000153691	Up
ENSSSCG00000001347	11.3505	3.05678	2.09532	2.06755e-06	4.28624e-05	Up
ENSSSCG00000001824	35.6502	13.5477	1.59852	5.54323e-16	2.65694e-14	Up
ENSSSCG00000001930	6672.14	2112.2	1.86206	0	0	Up
ENSSSCG00000002032	99.0031	31.1708	1.86994	7.79624e-19	4.39078e-17	Up
ENSSSCG00000002294	16.3283	4.2024	2.16075	1.09795e-07	2.71806e-06	Up
ENSSSCG00000002749	69.2594	5.22908	3.93004	1.04534e-19	6.09027e-18	Up
ENSSSCG00000002873	1151.85	342.337	1.95313	3.46733e-171	8.08045e-169	Up
ENSSSCG00000003081	19.987	2.28332	3.33251	6.71924e-06	0.000127558	Up
ENSSSCG00000003088	119.589	8.78518	3.96952	2.24118e-28	1.68296e-26	Up
ENSSSCG00000003090	29.0531	3.06855	3.44573	1.71536e-11	6.03801e-10	Up
ENSSSCG00000003109	78.4353	28.598	1.65825	1.33436e-07	3.22072e-06	Up
ENSSSCG00000003201	21.7266	4.23556	2.5615	5.75862e-06	0.000111196	Up
ENSSSCG00000003211	27.9944	11.9522	1.43052	0.000138312	0.00192734	Up
ENSSSCG00000003218	330.769	136.446	1.48016	3.05956e-68	4.1355e-66	Up
ENSSSCG00000003385	250.338	104.535	1.46255	1.54057e-15	7.18046e-14	Up
ENSSSCG00000003595	78.2007	34.2588	1.39337	0.000240539	0.00305571	Up
ENSSSCG00000003876	45.9537	16.8561	1.64957	1.66666e-05	0.000287342	Up
ENSSSCG00000004012	12.3079	1.02069	3.79462	2.43859e-15	1.12114e-13	Up
ENSSSCG00000004094	207.306	61.9428	1.94541	3.39287e-42	3.18473e-40	Up
ENSSSCG00000004489	796.553	385.587	1.24938	1.72044e-57	2.0763e-55	Up
ENSSSCG00000004570	10991.5	4310.61	1.55308	0	0	Up
ENSSSCG00000004578	49.0395	16.7641	1.75123	1.66214e-06	3.5104e-05	Up
ENSSSCG00000004697	140.228	59.5994	1.43707	2.28001e-06	4.69788e-05	Up
ENSSSCG00000004834	21.8428	5.31614	2.24137	2.61602e-05	0.000422964	Up
ENSSSCG00000005297	38.9024	19.3027	1.21372	9.51199e-07	2.08042e-05	Up
ENSSSCG00000005316	439.095	216.209	1.22476	2.02823e-20	1.28107e-18	Up
ENSSSCG00000005358	14.9145	0.843316	4.34716	4.06359e-05	0.00062701	Up
ENSSSCG00000005381	41.9322	16.837	1.51908	3.22136e-06	6.51824e-05	Up
ENSSSCG00000005627	1843.41	585.034	1.85845	1.0329e-196	2.49309e-194	Up
ENSSSCG00000005628	128.403	45.3899	1.70289	6.79511e-17	3.45289e-15	Up
ENSSSCG00000005649	89.3046	41.5224	1.3075	1.7775e-08	4.67428e-07	Up
ENSSSCG00000005842	54.583	20.5985	1.60858	0.000238151	0.00303108	Up
ENSSSCG00000006036	397.247	99.9498	2.19342	7.6796e-57	8.7968e-55	Up
ENSSSCG00000006328	29.2696	6.69806	2.33025	8.53575e-08	2.13657e-06	Up
ENSSSCG00000006390	4886.66	1882.67	1.57873	0	0	Up
ENSSSCG00000006535	38.1027	12.1016	1.85736	2.07002e-05	0.000344577	Up
ENSSSCG00000006581	144.639	46.1647	1.85025	3.64567e-27	2.67811e-25	Up
ENSSSCG00000006612	52.7376	20.2598	1.58287	7.48579e-06	0.000141317	Up
ENSSSCG00000006994	20.5023	6.63101	1.83115	0.000170265	0.00228768	Up
ENSSSCG00000007022	311.755	143.167	1.32538	1.25089e-121	2.34831e-119	Up
ENSSSCG00000007170	5.61926	0.388338	4.05765	0.00028299	0.00352684	Up
ENSSSCG00000007943	61.1229	27.8598	1.33619	0.000164415	0.00222746	Up
ENSSSCG00000007999	77.2157	34.2058	1.37731	6.50119e-05	0.000959324	Up
ENSSSCG00000008009	19.4983	1.77475	3.66032	1.71895e-05	0.000293528	Up
ENSSSCG00000008038	34.3738	11.1546	1.82633	3.603e-07	8.51406e-06	Up
ENSSSCG00000008313	80.6398	38.4918	1.2696	0.000370114	0.00449882	Up
ENSSSCG00000008468	41.6906	18.9736	1.33839	2.41271e-05	0.000392912	Up
ENSSSCG00000008948	25.5004	0	6.81292	8.0693e-14	3.45157e-12	Up
ENSSSCG00000009545	26.1782	8.80569	1.77452	3.99721e-13	1.59849e-11	Up
ENSSSCG00000009585	127.117	41.9522	1.802	2.02053e-13	8.22614e-12	Up
ENSSSCG00000009592	12.7095	3.25499	2.16784	0.000417028	0.00498833	Up
ENSSSCG00000009616	16.1054	2.7498	2.7528	7.64127e-13	3.00245e-11	Up
ENSSSCG00000009631	421.728	201.073	1.27126	2.69893e-15	1.22418e-13	Up
ENSSSCG00000009974	12.6615	0.513595	4.82633	6.53547e-07	1.47528e-05	Up
ENSSSCG00000010414	125.858	57.5125	1.33251	6.85347e-05	0.00100473	Up
ENSSSCG00000010461	277.909	112.105	1.51242	1.51815e-28	1.15282e-26	Up
ENSSSCG00000010554	9.7186	0.513232	4.44573	1.33663e-13	5.57614e-12	Up
ENSSSCG00000010774	40.6848	12.7946	1.87161	3.07548e-05	0.000491372	Up
ENSSSCG00000011033	52.3018	24.3978	1.30277	1.05017e-05	0.000191304	Up
ENSSSCG00000011106	38.5212	4.44605	3.31772	3.91364e-19	2.22266e-17	Up
ENSSSCG00000011129	14.1664	4.84614	1.75023	4.58438e-06	9.00659e-05	Up
ENSSSCG00000011265	333.472	140.022	1.45457	1.62592e-113	2.74711e-111	Up
ENSSSCG00000011379	27.9161	11.0493	1.53981	0.000191292	0.00250386	Up
ENSSSCG00000012050	159.406	26.9269	2.76824	9.96223e-55	1.08593e-52	Up
ENSSSCG00000012160	8.16186	0.42304	4.47269	9.90136e-10	3.04166e-08	Up
ENSSSCG00000012345	42.8977	9.11894	2.43662	1.58476e-11	5.60747e-10	Up
ENSSSCG00000012440	2132.64	951.008	1.36777	1.88085e-168	4.23713e-166	Up
ENSSSCG00000012766	45.4899	8.73061	2.58405	1.69805e-13	7.04045e-12	Up
ENSSSCG00000012911	295.376	99.9324	1.76619	5.22938e-86	8.03222e-84	Up
ENSSSCG00000013005	26.2419	12.3377	1.29145	0.000328726	0.004032	Up
ENSSSCG00000013017	84.4952	30.3989	1.67751	1.6273e-12	6.17855e-11	Up
ENSSSCG00000013043	288.247	116.672	1.50751	6.56215e-21	4.34795e-19	Up
ENSSSCG00000013366	7400.4	2541.98	1.74431	0	0	Up
ENSSSCG00000013601	85.9148	26.9272	1.8765	1.40592e-12	5.39866e-11	Up
ENSSSCG00000013614	39.5365	4.81123	3.24137	9.14603e-14	3.86323e-12	Up
ENSSSCG00000013743	65.2305	32.1776	1.22215	1.06427e-06	2.31276e-05	Up
ENSSSCG00000013780	373.627	164.416	1.38691	5.76412e-21	3.85701e-19	Up
ENSSSCG00000013892	20.227	2.1943	3.4071	1.65463e-09	4.88318e-08	Up
ENSSSCG00000014128	546.114	262.66	1.25867	5.09475e-33	4.30399e-31	Up
ENSSSCG00000014156	30.664	6.83867	2.36742	7.9996e-17	4.03461e-15	Up
ENSSSCG00000014818	50.995	24.3415	1.2696	3.93315e-05	0.000609666	Up
ENSSSCG00000015069	70.1142	0	6.38352	8.9802e-11	3.00451e-09	Up
ENSSSCG00000015070	54.304	16.0519	1.96098	4.10944e-06	8.13826e-05	Up
ENSSSCG00000015105	248.282	37.4641	2.93106	1.11365e-81	1.60137e-79	Up
ENSSSCG00000015326	46.9917	10.4611	2.37003	1.31874e-29	1.03633e-27	Up
ENSSSCG00000015595	103.719	31.9421	1.9018	1.06306e-19	6.14061e-18	Up
ENSSSCG00000015724	463.345	194.567	1.45448	6.1633e-17	3.17966e-15	Up
ENSSSCG00000016034	67.046	15.841	2.28415	3.89911e-37	3.561e-35	Up
ENSSSCG00000016157	21327.5	9958.49	1.30138	0	0	Up
ENSSSCG00000016435	39.6841	17.747	1.36365	0.000222799	0.00285179	Up
ENSSSCG00000017126	48.9905	15.8825	1.82772	3.03832e-12	1.12207e-10	Up
ENSSSCG00000017419	60.7918	30.0844	1.21752	5.03616e-06	9.83698e-05	Up
ENSSSCG00000017510	43.3037	19.3804	1.36255	3.37624e-08	8.70904e-07	Up
ENSSSCG00000017581	122.329	35.4193	1.99082	0.000413755	0.00495795	Up
ENSSSCG00000017904	6800.07	2869.45	1.44744	0	0	Up
ENSSSCG00000017983	22.3867	6.14294	2.0683	9.27285e-12	3.31581e-10	Up
ENSSSCG00000018005	2545.55	865.896	1.75837	0	0	Up
ENSSSCG00000018052	22.1791	4.74905	2.42615	2.9702e-05	0.000475677	Up
ENSSSCG00000020657	115.696	16.2149	3.03761	1.81927e-57	2.15705e-55	Up
ENSSSCG00000021059	918.297	357.878	1.56215	4.24686e-295	1.2479e-292	Up
ENSSSCG00000021650	4232.55	2076.54	1.23001	4.11896e-105	6.62792e-103	Up
ENSSSCG00000021703	426.898	138.887	1.82263	1.54777e-09	4.60806e-08	Up
ENSSSCG00000021739	31.7149	13.4967	1.43522	0.000171773	0.00230336	Up
ENSSSCG00000021972	154.98	57.8362	1.6247	2.54591e-09	7.35303e-08	Up
ENSSSCG00000022209	110.317	22.5764	2.49143	1.24625e-11	4.43291e-10	Up
ENSSSCG00000022404	76.2765	6.65556	3.72127	1.8233e-29	1.41637e-27	Up
ENSSSCG00000022748	107.386	29.5289	2.06527	3.36704e-06	6.79269e-05	Up
ENSSSCG00000022904	112.005	32.2709	1.99791	5.89281e-08	1.4972e-06	Up
ENSSSCG00000022922	285.365	32.2709	3.34716	0.000213256	0.00274523	Up
ENSSSCG00000023044	19.6063	1.15528	4.28766	4.08635e-12	1.4928e-10	Up
ENSSSCG00000024018	113.578	42.0354	1.63667	3.35853e-18	1.86049e-16	Up
ENSSSCG00000024103	39.892	9.27547	2.30727	2.12457e-20	1.32949e-18	Up
ENSSSCG00000024109	14.0228	5.29542	1.60762	0.000359541	0.00437818	Up
ENSSSCG00000024230	46.563	19.2384	1.47785	1.90205e-05	0.000319767	Up
ENSSSCG00000024263	1976.6	908.55	1.32404	7.61919e-48	7.68551e-46	Up
ENSSSCG00000024398	49.2849	0	6.6625	1.14851e-12	4.46093e-11	Up
ENSSSCG00000024676	55.9513	26.5836	1.27629	3.64078e-06	7.30134e-05	Up
ENSSSCG00000024752	37.1492	9.28659	2.20277	4.92449e-13	1.95772e-11	Up
ENSSSCG00000025078	57.0394	18.782	1.80527	4.40147e-09	1.26044e-07	Up
ENSSSCG00000025146	23.5533	6.90623	1.97262	0.000117192	0.00165694	Up
ENSSSCG00000025460	1593.24	715.124	1.35836	0	0	Up
ENSSSCG00000025831	73.8817	30.6929	1.46997	4.77451e-09	1.34449e-07	Up
ENSSSCG00000026167	169.557	25.3105	2.94662	2.01605e-05	0.000336423	Up
ENSSSCG00000026533	243.865	105.231	1.41518	3.34067e-18	1.86049e-16	Up
ENSSSCG00000026554	56.2295	12.7176	2.34716	2.16707e-05	0.000357214	Up
ENSSSCG00000026931	168.625	55.1295	1.81558	4.2521e-11	1.43685e-09	Up
ENSSSCG00000027130	138.467	60.7929	1.39023	8.37351e-06	0.000156328	Up
ENSSSCG00000027197	87.4877	39.1643	1.3622	1.43245e-12	5.46946e-11	Up
ENSSSCG00000027428	478.138	66.945	3.03904	1.21113e-58	1.48821e-56	Up
ENSSSCG00000027466	19.0703	5.52164	1.99082	0.000413755	0.00495795	Up
ENSSSCG00000028022	27.536	10.276	1.6247	4.49459e-07	1.04384e-05	Up
ENSSSCG00000028326	63.8655	13.8568	2.4071	1.53754e-09	4.59785e-08	Up
ENSSSCG00000028384	20.9613	5.64506	2.09532	2.06755e-06	4.28624e-05	Up
ENSSSCG00000028720	93.2996	44.6781	1.26497	1.12214e-13	4.7104e-12	Up
ENSSSCG00000029179	452.481	208.26	1.32213	1.41034e-15	6.61912e-14	Up
ENSSSCG00000029502	25.2836	10.3077	1.49715	6.6456e-05	0.000978498	Up
ENSSSCG00000029698	35.2933	14.1557	1.52067	0.00012544	0.00175884	Up
ENSSSCG00000030000	9.85929	2.29959	2.30277	0.000351285	0.00428537	Up
ENSSSCG00000030134	6140.01	1675.23	2.07654	0	0	Up
ENSSSCG00000030302	1433.74	667.491	1.30563	1.63463e-47	1.62461e-45	Up
ENSSSCG00000000921	11.6541	29.2901	-1.12692	4.67716e-09	1.32258e-07	Down
ENSSSCG00000001076	4.58704	26.2479	-2.3139	2.71731e-20	1.66949e-18	Down
ENSSSCG00000001229	65.232	162.915	-1.11781	2.5174e-16	1.24185e-14	Down
ENSSSCG00000001252	3.24025	24.94	-2.74163	9.433e-07	2.06984e-05	Down
ENSSSCG00000001453	19.6784	50.1647	-1.1474	3.75176e-07	8.83469e-06	Down
ENSSSCG00000001456	16.352	42.0566	-1.1602	0.000206444	0.00266262	Down
ENSSSCG00000001834	27.2406	54.6294	-0.801256	1.25156e-05	0.000220217	Down
ENSSSCG00000001970	0.969933	3.74892	-1.74786	0.000297802	0.00368616	Down
ENSSSCG00000002274	11.5804	36.271	-1.44447	6.77693e-09	1.87707e-07	Down
ENSSSCG00000002383	21.2959	73.603	-1.58653	5.98287e-16	2.84747e-14	Down
ENSSSCG00000002429	5.64952	15.3023	-1.23489	0.000283845	0.00352684	Down
ENSSSCG00000002841	2.77175	6.89584	-1.11227	0.000154833	0.00211396	Down
ENSSSCG00000003018	4.63698	13.5964	-1.34931	0.000145485	0.0020107	Down
ENSSSCG00000003159	2.92513	19.7855	-2.55521	8.72031e-06	0.000161465	Down
ENSSSCG00000003467	3.96764	16.5151	-1.85477	0.00018008	0.0023893	Down
ENSSSCG00000003505	14.7674	30.4554	-0.841623	7.25398e-09	1.99287e-07	Down
ENSSSCG00000003570	6.79607	20.5519	-1.39384	6.13325e-05	0.000909001	Down
ENSSSCG00000003579	6.57721	16.9	-1.15881	1.94608e-06	4.05933e-05	Down
ENSSSCG00000003593	21.6939	62.218	-1.31738	3.67875e-13	1.47989e-11	Down
ENSSSCG00000003629	11.0845	37.6825	-1.56269	1.32578e-24	9.23716e-23	Down
ENSSSCG00000003645	10.5073	39.2119	-1.69723	4.99076e-07	1.15117e-05	Down
ENSSSCG00000003691	12.3421	66.4314	-2.22561	2.61891e-11	8.93909e-10	Down
ENSSSCG00000003768	14.9969	32.4966	-0.912962	0.000164929	0.00222746	Down
ENSSSCG00000003776	28.4357	79.9843	-1.28936	2.64085e-15	1.20592e-13	Down
ENSSSCG00000003857	2.83071	9.68347	-1.5717	2.93053e-05	0.000470438	Down
ENSSSCG00000004110	16.5139	35.1134	-0.885678	1.31639e-07	3.19183e-06	Down
ENSSSCG00000004143	6.8975	37.6573	-2.24613	6.18441e-12	2.23509e-10	Down
ENSSSCG00000004231	59.2966	262.777	-1.94516	6.79476e-08	1.71989e-06	Down
ENSSSCG00000004248	40.2918	100.242	-1.11227	1.04664e-05	0.000191176	Down
ENSSSCG00000004419	9.6033	38.3269	-1.79409	2.15382e-09	6.24728e-08	Down
ENSSSCG00000004576	0.390795	3.88904	-3.11227	0.000312465	0.00386058	Down
ENSSSCG00000004603	2.7141	7.87782	-1.33466	2.08288e-05	0.000345866	Down
ENSSSCG00000004624	16.0115	46.5248	-1.33624	4.32131e-16	2.08605e-14	Down
ENSSSCG00000004687	39.0109	101.099	-1.17116	5.0496e-09	1.41605e-07	Down
ENSSSCG00000004727	3.30799	11.3953	-1.58176	1.17753e-05	0.000208328	Down
ENSSSCG00000004729	4.59348	11.4281	-1.11227	0.000154833	0.00211396	Down
ENSSSCG00000004997	2.74521	11.2692	-1.83474	7.17955e-05	0.00105025	Down
ENSSSCG00000005045	1.72948	12.9084	-2.69723	0.000151536	0.0020858	Down
ENSSSCG00000005166	2.79465	20.2067	-2.65143	8.08417e-21	5.2534e-19	Down
ENSSSCG00000005235	1.44929	10.479	-2.65143	2.88004e-06	5.88043e-05	Down
ENSSSCG00000005243	9.04857	21.6115	-1.05338	9.50491e-05	0.00136675	Down
ENSSSCG00000005392	23.8549	84.572	-1.62323	7.47329e-05	0.00109086	Down
ENSSSCG00000005453	64.6799	152.172	-1.03165	0.00024739	0.00313098	Down
ENSSSCG00000005753	4.55636	10.9751	-1.06562	3.44171e-05	0.000544735	Down
ENSSSCG00000005943	2.45085	11.1279	-1.98017	6.86555e-10	2.14813e-08	Down
ENSSSCG00000005981	7.51586	47.6818	-2.46277	2.60814e-16	1.27729e-14	Down
ENSSSCG00000005984	10.3016	25.1366	-1.08426	4.13288e-05	0.000636248	Down
ENSSSCG00000006049	0.915474	7.25989	-2.7847	0.000393984	0.00475476	Down
ENSSSCG00000006214	7.88236	28.5507	-1.65416	0.00018892	0.00248341	Down
ENSSSCG00000006267	4.6938	20.8851	-1.95099	6.7053e-05	0.000985141	Down
ENSSSCG00000006308	6.02484	20.1693	-1.54051	1.17384e-06	2.53456e-05	Down
ENSSSCG00000006680	79.1758	165.069	-0.857273	1.70425e-09	5.00775e-08	Down
ENSSSCG00000006725	12.2738	36.0879	-1.35328	3.51426e-05	0.000554917	Down
ENSSSCG00000006826	1.75404	14.4008	-2.83474	4.82664e-05	0.000729752	Down
ENSSSCG00000006924	2.26266	12.0163	-2.20625	3.1519e-06	6.39686e-05	Down
ENSSSCG00000007205	2.1748	12.7538	-2.34931	0.000203982	0.00264601	Down
ENSSSCG00000007516	15.9178	32.8838	-0.844074	4.79008e-05	0.000725849	Down
ENSSSCG00000007525	8.8265	24.3464	-1.26113	6.10687e-06	0.00011725	Down
ENSSSCG00000007851	0.471035	6.59188	-3.60412	0.000232617	0.00296622	Down
ENSSSCG00000007942	50.0695	106.272	-0.883099	4.62927e-09	1.31454e-07	Down
ENSSSCG00000007950	20.7538	56.7968	-1.24977	9.43293e-06	0.000173708	Down
ENSSSCG00000008144	4.40165	22.5862	-2.15666	0.000384899	0.00466177	Down
ENSSSCG00000008216	36.0806	78.6372	-0.921328	3.62172e-20	2.18542e-18	Down
ENSSSCG00000008412	30.345	62.1814	-0.832362	7.15322e-18	3.8368e-16	Down
ENSSSCG00000008540	133.821	316.455	-1.03904	1.59706e-46	1.54192e-44	Down
ENSSSCG00000008976	6.75819	40.1237	-2.36708	2.91794e-11	9.90971e-10	Down
ENSSSCG00000008979	0.901555	7.14951	-2.7847	0.000393984	0.00475476	Down
ENSSSCG00000008980	22.1221	48.7285	-0.936616	2.14128e-12	8.0846e-11	Down
ENSSSCG00000009048	1.7857	7.40442	-1.84924	1.12739e-05	0.000201036	Down
ENSSSCG00000009110	96.7876	648.379	-2.54128	3.61136e-34	3.16971e-32	Down
ENSSSCG00000009211	119.334	243.521	-0.826378	5.54713e-14	2.40316e-12	Down
ENSSSCG00000009425	2.46962	7.95951	-1.48573	0.000176315	0.00234565	Down
ENSSSCG00000009773	32.5348	66.2991	-0.824345	0.000155985	0.0021254	Down
ENSSSCG00000009793	12.8495	34.0805	-1.20457	5.84611e-14	2.51655e-12	Down
ENSSSCG00000009794	0.756775	6.4956	-2.89887	2.7162e-05	0.000438112	Down
ENSSSCG00000009994	4.97454	11.2712	-0.977341	1.85508e-05	0.000314216	Down
ENSSSCG00000010212	1.62171	3.99175	-1.09684	7.99563e-05	0.00115711	Down
ENSSSCG00000010303	21.199	65.5966	-1.42697	5.77753e-17	3.00357e-15	Down
ENSSSCG00000010389	100.624	223.414	-0.948078	1.49185e-46	1.46122e-44	Down
ENSSSCG00000010494	11.284	31.9223	-1.29763	1.09677e-17	5.83648e-16	Down
ENSSSCG00000010606	3.82314	8.46371	-0.943873	0.000146295	0.00201777	Down
ENSSSCG00000011081	4.30146	12.7312	-1.36281	9.28068e-05	0.00134021	Down
ENSSSCG00000011166	1.32552	7.77328	-2.34931	0.000203982	0.00264601	Down
ENSSSCG00000011243	1.8326	6.01831	-1.51281	4.4738e-05	0.000685608	Down
ENSSSCG00000011508	346.508	775.414	-0.959419	2.89625e-64	3.76418e-62	Down
ENSSSCG00000011534	7.66766	54.1943	-2.61862	9.52856e-21	6.13305e-19	Down
ENSSSCG00000011831	17.7155	76.0736	-1.89973	6.20945e-20	3.64917e-18	Down
ENSSSCG00000011885	15.7286	37.8929	-1.06588	6.85274e-07	1.53864e-05	Down
ENSSSCG00000012178	1.09692	12.9629	-3.3602	5.24521e-05	0.000789505	Down
ENSSSCG00000012427	58.2468	167.207	-1.31872	1.66394e-08	4.39275e-07	Down
ENSSSCG00000012583	6.27807	14.4941	-1.00441	5.34623e-05	0.000801141	Down
ENSSSCG00000012653	3.84718	29.0406	-2.71353	1.10781e-15	5.2356e-14	Down
ENSSSCG00000013155	14.2837	36.737	-1.1602	0.000206444	0.00266262	Down
ENSSSCG00000013312	16.5302	33.29	-0.807322	1.47243e-10	4.85422e-09	Down
ENSSSCG00000013400	2.70467	21.028	-2.75613	1.88699e-05	0.000318554	Down
ENSSSCG00000013512	4.01565	11.2394	-1.2822	7.53918e-05	0.00109811	Down
ENSSSCG00000013735	7.33549	27.9014	-1.72471	1.22558e-06	2.63785e-05	Down
ENSSSCG00000013927	5.99006	16.1081	-1.22448	0.000165312	0.00222746	Down
ENSSSCG00000014269	2.73121	7.64437	-1.2822	0.000122835	0.0017259	Down
ENSSSCG00000014362	2.43426	20.7641	-2.88988	7.70331e-07	1.7182e-05	Down
ENSSSCG00000014865	11.3334	30.0293	-1.20312	7.35855e-06	0.000139304	Down
ENSSSCG00000014924	11.1161	43.0394	-1.75034	9.08547e-10	2.81663e-08	Down
ENSSSCG00000015013	3.59997	13.8544	-1.74163	0.000117905	0.00166354	Down
ENSSSCG00000015099	2.29225	6.60171	-1.32342	1.87676e-06	3.93877e-05	Down
ENSSSCG00000015249	0.825135	20.3233	-4.4197	3.97811e-16	1.93419e-14	Down
ENSSSCG00000015274	0.528355	9.85873	-4.01916	7.77928e-08	1.95445e-06	Down
ENSSSCG00000015405	37.3586	77.0893	-0.842431	7.77497e-09	2.11878e-07	Down
ENSSSCG00000015583	17.5929	57.0436	-1.49442	3.23135e-10	1.03993e-08	Down
ENSSSCG00000015683	5.89171	15.356	-1.17938	8.35258e-07	1.8508e-05	Down
ENSSSCG00000015872	15.8504	32.5603	-0.835939	4.4565e-06	8.78089e-05	Down
ENSSSCG00000015917	664.538	1430	-0.902931	1.56302e-220	4.22536e-218	Down
ENSSSCG00000015987	13.1242	35.3728	-1.22775	1.38654e-05	0.000242455	Down
ENSSSCG00000016156	7.80609	22.9813	-1.35513	1.30735e-06	2.79604e-05	Down
ENSSSCG00000016266	62.1533	148.749	-1.05631	1.62049e-32	1.35207e-30	Down
ENSSSCG00000016518	3.71327	12.2827	-1.5232	0.000113867	0.00161332	Down
ENSSSCG00000016866	0.803166	9.49144	-3.3602	5.24521e-05	0.000789505	Down
ENSSSCG00000016877	14.1866	48.5304	-1.5717	6.38519e-17	3.26918e-15	Down
ENSSSCG00000016896	59.3192	134.298	-0.976209	9.56311e-06	0.000175626	Down
ENSSSCG00000016991	43.9528	127.732	-1.33644	7.21167e-21	4.73191e-19	Down
ENSSSCG00000017094	5.18516	16.8931	-1.50131	1.33497e-10	4.42261e-09	Down
ENSSSCG00000017101	27.4107	79.7281	-1.33769	5.27593e-28	3.91828e-26	Down
ENSSSCG00000017105	12.3965	32.7689	-1.19973	1.19063e-05	0.000210095	Down
ENSSSCG00000017381	5.38932	13.8652	-1.16063	7.10999e-07	1.59111e-05	Down
ENSSSCG00000017406	9.18685	25.5811	-1.27478	5.35355e-08	1.36532e-06	Down
ENSSSCG00000017731	24.6723	71.0863	-1.32402	6.71406e-09	1.86731e-07	Down
ENSSSCG00000017791	1.11526	17.1104	-3.73676	1.36384e-16	6.7774e-15	Down
ENSSSCG00000018061	1703.24	3725.58	-0.926527	3.11079e-164	6.5699e-162	Down
ENSSSCG00000018072	124.523	477.609	-1.73676	4.69404e-05	0.0007137	Down
ENSSSCG00000018073	125.781	806.773	-2.47859	1.60696e-09	4.76332e-08	Down
ENSSSCG00000018075	30865.1	63370.7	-0.83518	0	0	Down
ENSSSCG00000018086	445.473	1313.65	-1.35752	8.12376e-31	6.61481e-29	Down
ENSSSCG00000018087	4402.28	10309.4	-1.02497	0	0	Down
ENSSSCG00000018091	967.599	2206.33	-0.986508	1.38909e-199	3.47701e-197	Down
ENSSSCG00000020701	9.04818	55.9691	-2.42627	5.66153e-36	5.10166e-34	Down
ENSSSCG00000020706	13.6382	37.6187	-1.26113	6.10687e-06	0.00011725	Down
ENSSSCG00000020775	2.70232	31.6946	-3.34931	3.50152e-18	1.90841e-16	Down
ENSSSCG00000021318	0.852312	4.37347	-2.15666	0.000384899	0.00466177	Down
ENSSSCG00000021353	8.15716	25.3678	-1.4342	1.01512e-05	0.000185922	Down
ENSSSCG00000021356	20071.1	213565	-3.20883	0	0	Down
ENSSSCG00000021654	3.8247	11.374	-1.36966	3.64795e-05	0.000570695	Down
ENSSSCG00000021779	69.475	148.943	-0.897532	5.053e-06	9.84144e-05	Down
ENSSSCG00000022111	61.1557	209.51	-1.5738	1.37774e-41	1.2755e-39	Down
ENSSSCG00000022128	9.6428	20.8948	-0.912962	0.000164929	0.00222746	Down
ENSSSCG00000022301	266.689	578.978	-0.915689	3.78832e-20	2.26572e-18	Down
ENSSSCG00000022783	22.8138	57.9528	-1.14231	1.44892e-17	7.65019e-16	Down
ENSSSCG00000022828	2.93765	10.9629	-1.69723	1.89012e-05	0.000318554	Down
ENSSSCG00000022912	7.1232	22.2952	-1.44348	1.63811e-05	0.000283252	Down
ENSSSCG00000023287	28.8247	105.889	-1.67451	2.0293e-07	4.86336e-06	Down
ENSSSCG00000023609	2.0543	6.33308	-1.4216	0.000263677	0.00331846	Down
ENSSSCG00000023963	23.1138	87.3925	-1.71609	5.53587e-09	1.546e-07	Down
ENSSSCG00000023975	3.44435	16.3594	-2.04516	0.000100097	0.00142719	Down
ENSSSCG00000024087	4.25425	111.782	-4.51298	8.2678e-154	1.69322e-151	Down
ENSSSCG00000024253	9.53467	22.6094	-1.04301	0.000153301	0.00210182	Down
ENSSSCG00000024517	5.25793	15.0668	-1.31614	0.000218879	0.00280693	Down
ENSSSCG00000024623	14.3367	36.7	-1.15341	2.56086e-11	8.78534e-10	Down
ENSSSCG00000024748	6.19556	16.7258	-1.23011	8.56077e-06	0.000159384	Down
ENSSSCG00000024791	27.8739	132.004	-2.04093	7.62914e-53	8.05627e-51	Down
ENSSSCG00000024814	1.42867	11.5518	-2.81271	1.06948e-05	0.00019357	Down
ENSSSCG00000024853	2070.49	84428	-5.14702	0	0	Down
ENSSSCG00000024960	2.94297	9.88445	-1.54523	0.000183592	0.00242813	Down
ENSSSCG00000024983	6.85649	15.1008	-0.936421	0.000127594	0.00178535	Down
ENSSSCG00000025162	25024.9	448902	-3.96231	0	0	Down
ENSSSCG00000025447	58.1551	122.667	-0.874111	3.47498e-12	1.27636e-10	Down
ENSSSCG00000026430	3.62354	14.1564	-1.76332	3.2595e-08	8.47259e-07	Down
ENSSSCG00000026644	3.02632	8.9409	-1.3602	1.38836e-05	0.000242455	Down
ENSSSCG00000026731	8.2953	29.0221	-1.60412	2.78984e-12	1.03597e-10	Down
ENSSSCG00000026805	0.550207	15.3997	-4.60412	9.30231e-05	0.00134047	Down
ENSSSCG00000027046	0.281522	4.2024	-3.69723	1.36975e-09	4.15121e-08	Down
ENSSSCG00000027344	4.67428	61.0531	-3.50459	2.53875e-08	6.62458e-07	Down
ENSSSCG00000027516	19.78	59.6207	-1.38911	8.97933e-08	2.2393e-06	Down
ENSSSCG00000027613	68.004	164.488	-1.07163	4.28619e-07	1.00233e-05	Down
ENSSSCG00000027628	2.06495	14.3982	-2.59905	2.30142e-12	8.64094e-11	Down
ENSSSCG00000027669	3.62439	20.8088	-2.31872	6.54873e-07	1.47528e-05	Down
ENSSSCG00000027847	2.15288	22.7637	-3.19973	0.000172408	0.0023073	Down
ENSSSCG00000027864	0.773818	21.6583	-4.60412	5.44241e-15	2.43586e-13	Down
ENSSSCG00000027969	2.63947	66.3711	-4.44957	6.81615e-126	1.31616e-123	Down
ENSSSCG00000028304	11.6936	34.0743	-1.3403	1.13942e-09	3.48442e-08	Down
ENSSSCG00000028552	3.26098	9.56175	-1.34931	0.000145485	0.0020107	Down
ENSSSCG00000028753	6.79339	46.7426	-2.57988	1.86562e-10	6.1206e-09	Down
ENSSSCG00000029251	21.8361	118.691	-2.23976	4.23747e-54	4.54574e-52	Down
ENSSSCG00000029613	20.0364	283.63	-3.62065	3.6679e-244	1.03287e-241	Down
ENSSSCG00000029715	2.74003	23.3724	-2.88988	2.74644e-12	1.02549e-10	Down
ENSSSCG00000029864	1.29711	24.2032	-4.01916	5.53055e-10	1.7548e-08	Down
ENSSSCG00000029990	6.15231	45.9191	-2.69723	3.32273e-05	0.000527138	Down
ENSSSCG00000030054	3.66531	18.2379	-2.11227	0.000245973	0.00311887	Down
ENSSSCG00000030070	12.8967	72.8101	-2.29447	1.94177e-17	1.01729e-15	Down
ENSSSCG00000030095	3.26318	24.3554	-2.69723	1.64983e-06	3.49533e-05	Down
ENSSSCG00000030278	12.7726	33.4948	-1.18822	0.000141398	0.00196628	Down
ENSSSCG00000030284	12.948	36.2401	-1.2822	0.0003277	0.00402673	Down
ENSSSCG00000030289	8.08197	20.7148	-1.15522	6.88593e-09	1.89948e-07	Down
ENSSSCG00000030395	40.1076	92.7765	-1.00722	6.7473e-18	3.64803e-16	Down
ENSSSCG00000030396	10.526	35.6808	-1.55853	2.16311e-20	1.34119e-18	Down
ENSSSCG00000030708	7.48523	18.3775	-1.09316	0.00040854	0.00491288	Down
