# Supplementary material for: Comparison of differentially expressed genes in longissimus dorsi muscle of Diannan small ears, Wujin and landrace pigs using RNA-seq
Source: Front Vet Sci. 2024 Jan 5;10:1296208. doi: 10.3389/fvets.2023.1296208 (PMC10796741; doi:10.3389/fvets.2023.1296208)
Supplement: Supplementary file 7 [file Table_4.XLSX]

## Sheet: Sheet1
Table S4. Differentially expressed genes between WJ and LP
Gene_id	RPKM_W17_W20_W21	RPKM_L6_L7_L12	log2.Fold_change.	p.value	q.value.Storey.et.al..2003.	UP/DOWN regulate
ENSSSCG00000000068	13.0445	5.51963	1.17499	3.47014e-07	3.43326e-06	Up
ENSSSCG00000000292	8.41221	1.32134	2.60467	0.000243664	0.00119969	Up
ENSSSCG00000000804	5.67397	0.297077	4.18964	8.90294e-06	6.40883e-05	Up
ENSSSCG00000000896	12.8306	3.02302	2.01971	4.08205e-06	3.1976e-05	Up
ENSSSCG00000000912	7.69148	2.78799	1.39822	2.51321e-05	0.000158266	Up
ENSSSCG00000000997	7.00423	0.330054	4.34164	0.000837293	0.00342058	Up
ENSSSCG00000001056	31.2242	12.5839	1.24527	2.80794e-06	2.26762e-05	Up
ENSSSCG00000001065	8.26832	0.649368	3.60467	2.23161e-05	0.000143124	Up
ENSSSCG00000001066	84.6443	35.022	1.20734	1.74488e-16	4.58186e-15	Up
ENSSSCG00000001229	139.142	65.232	1.02709	7.37759e-11	1.2272e-09	Up
ENSSSCG00000001487	39.3031	11.9838	1.64774	6.62579e-08	7.43649e-07	Up
ENSSSCG00000001527	164.08	57.9886	1.43475	2.12344e-07	2.18583e-06	Up
ENSSSCG00000001683	22.9218	8.10093	1.43475	4.91276e-08	5.60426e-07	Up
ENSSSCG00000001711	11.9911	1.32952	3.10717	3.98486e-08	4.67344e-07	Up
ENSSSCG00000002315	9.56927	3.94559	1.21236	0.000262199	0.00128489	Up
ENSSSCG00000002383	46.2201	21.2959	1.05213	6.96844e-06	5.17693e-05	Up
ENSSSCG00000002411	4.41389	1.03996	2.01971	0.000455736	0.00206374	Up
ENSSSCG00000002429	21.6577	5.64952	1.87287	9.65456e-08	1.04428e-06	Up
ENSSSCG00000002797	62.5853	20.2326	1.56333	4.63204e-09	6.34083e-08	Up
ENSSSCG00000003159	13.967	2.92513	2.18964	0.000869397	0.00352415	Up
ENSSSCG00000003559	12.2236	1.1077	3.39822	6.20193e-07	5.80584e-06	Up
ENSSSCG00000003579	16.4748	6.57721	1.2589	4.3074e-06	3.35524e-05	Up
ENSSSCG00000003766	126.968	48.5819	1.32016	7.57895e-19	2.2284e-17	Up
ENSSSCG00000003768	43.1186	14.9969	1.45783	3.46337e-08	4.14331e-07	Up
ENSSSCG00000003809	13.51	0.454728	4.82707	5.49641e-05	0.000314983	Up
ENSSSCG00000003857	14.0167	2.83071	2.2421	2.59558e-09	3.66113e-08	Up
ENSSSCG00000003985	6.84955	0	4.69096	0.000201593	0.00102519	Up
ENSSSCG00000004064	10.6119	4.21477	1.26635	5.33163e-06	4.09199e-05	Up
ENSSSCG00000004088	13.283	3.5767	1.82707	0.000206203	0.00104609	Up
ENSSSCG00000004143	43.3703	6.8975	2.58675	1.29148e-14	2.86816e-13	Up
ENSSSCG00000004165	8.02476	0.94536	3.01971	5.23526e-06	4.02543e-05	Up
ENSSSCG00000004231	377.508	59.2966	2.60467	2.17223e-13	4.38135e-12	Up
ENSSSCG00000004248	192.011	40.2918	2.18682	7.13999e-19	2.11423e-17	Up
ENSSSCG00000004392	36.2464	15.5818	1.15216	6.0772e-08	6.85765e-07	Up
ENSSSCG00000004438	18.4771	1.97881	3.15722	8.65554e-06	6.26313e-05	Up
ENSSSCG00000004576	9.95188	0.390795	4.60467	1.39429e-10	2.27397e-09	Up
ENSSSCG00000004607	21.7172	1.02336	4.34164	7.23636e-09	9.56106e-08	Up
ENSSSCG00000004687	130.619	39.0109	1.67761	2.78694e-15	6.68732e-14	Up
ENSSSCG00000004789	4.09802	0.438881	3.15722	8.65554e-06	6.26313e-05	Up
ENSSSCG00000004861	10.1762	0.639365	3.9266	1.78808e-08	2.20222e-07	Up
ENSSSCG00000005110	2.2334	0.892272	1.25787	0.000241269	0.00119779	Up
ENSSSCG00000005205	5.02482	1.03591	2.21236	7.94293e-06	5.8283e-05	Up
ENSSSCG00000005235	14.6091	1.44929	3.26764	2.99423e-09	4.18106e-08	Up
ENSSSCG00000005297	84.7211	38.9024	1.05705	3.52584e-15	8.2702e-14	Up
ENSSSCG00000005392	75.9355	23.8549	1.60467	0.000426018	0.00195625	Up
ENSSSCG00000005437	12.8529	2.42262	2.34164	7.85654e-06	5.77505e-05	Up
ENSSSCG00000005706	9.75472	2.01103	2.21236	4.48489e-08	5.18702e-07	Up
ENSSSCG00000005715	6.49895	1.77048	1.81026	2.44136e-08	2.95451e-07	Up
ENSSSCG00000005965	8.12261	1.27585	2.60467	0.000243664	0.00119969	Up
ENSSSCG00000005981	24.4563	7.51586	1.63638	9.80409e-06	6.97336e-05	Up
ENSSSCG00000005984	26.0657	10.3016	1.27347	1.70108e-05	0.000114001	Up
ENSSSCG00000006014	11.2565	4.46678	1.26764	0.000791365	0.00329372	Up
ENSSSCG00000006038	3.12093	0.147065	4.34164	0.000837293	0.00342058	Up
ENSSSCG00000006066	7.07352	2.06658	1.70937	2.06535e-06	1.72463e-05	Up
ENSSSCG00000006107	9.55075	0.642931	3.82707	0.000135476	0.000719637	Up
ENSSSCG00000006174	189.452	64.9156	1.47939	8.15971e-62	5.87381e-60	Up
ENSSSCG00000006267	22.9867	4.6938	2.22616	1.42036e-05	9.72464e-05	Up
ENSSSCG00000006308	15.794	6.02484	1.32457	0.000269993	0.00131077	Up
ENSSSCG00000006334	16.1446	3.04308	2.34164	7.85654e-06	5.77505e-05	Up
ENSSSCG00000006652	88.6306	23.2918	1.86217	3.05167e-07	3.04814e-06	Up
ENSSSCG00000006729	7.56745	0.25471	4.82707	5.49641e-05	0.000314983	Up
ENSSSCG00000006826	13.4004	1.75404	2.86771	0.000117818	0.00063309	Up
ENSSSCG00000006872	6.68257	1.78442	1.83914	0.000114329	0.000615133	Up
ENSSSCG00000006940	23.5813	8.97508	1.32783	4.90202e-05	0.000287858	Up
ENSSSCG00000006993	19.5094	0.574579	5.01971	1.46046e-05	9.96352e-05	Up
ENSSSCG00000007039	36.4994	15.1517	1.20258	1.58832e-06	1.35891e-05	Up
ENSSSCG00000007473	6.04427	2.29437	1.33166	0.000710913	0.00299816	Up
ENSSSCG00000007927	7.38448	1.46515	2.26764	7.88952e-07	7.19215e-06	Up
ENSSSCG00000007949	224.384	106.324	1.01169	1.43772e-26	5.66296e-25	Up
ENSSSCG00000007950	48.9362	20.7538	1.17172	0.000280853	0.00135093	Up
ENSSSCG00000007951	12.0089	3.24204	1.82331	6.7452e-12	1.20868e-10	Up
ENSSSCG00000008150	25.5863	7.23409	1.75668	0.000181046	0.000930906	Up
ENSSSCG00000008203	23.2047	5.46728	2.01971	0.000830664	0.00340683	Up
ENSSSCG00000008215	21.6692	1.91456	3.43475	8.61163e-05	0.000473715	Up
ENSSSCG00000008216	96.1849	36.0806	1.34878	4.97163e-34	2.41364e-32	Up
ENSSSCG00000008261	6.35841	0.998739	2.60467	0.000243664	0.00119969	Up
ENSSSCG00000008359	39.2945	17.3591	1.11282	0.000616253	0.00263893	Up
ENSSSCG00000008398	13.4801	5.11699	1.33166	1.68749e-06	1.43494e-05	Up
ENSSSCG00000008439	22.203	2.85341	2.89418	1.90468e-05	0.000125037	Up
ENSSSCG00000008448	8.11429	2.76151	1.4892	0.00024683	0.00121385	Up
ENSSSCG00000008461	9.5791	1.00308	3.18964	5.31477e-05	0.000306916	Up
ENSSSCG00000008629	7.76961	1.74343	2.0901	7.56158e-07	6.95393e-06	Up
ENSSSCG00000008644	18.8377	4.99316	1.84979	2.55415e-10	4.09067e-09	Up
ENSSSCG00000008833	18.0688	3.19289	2.43475	0.000850863	0.00345909	Up
ENSSSCG00000008976	20.8609	6.75819	1.56028	0.000357498	0.00167521	Up
ENSSSCG00000009110	276.108	96.7876	1.44653	5.9488e-08	6.74924e-07	Up
ENSSSCG00000009111	255.217	96.5657	1.33633	3.29228e-82	2.92464e-80	Up
ENSSSCG00000009134	19.9138	1.56396	3.60467	9.76327e-07	8.74747e-06	Up
ENSSSCG00000009233	6.47209	0.762447	3.01971	0.00019982	0.0010224	Up
ENSSSCG00000009465	35.2435	16.7459	1.00774	5.10226e-07	4.87478e-06	Up
ENSSSCG00000009781	6.66944	2.71422	1.23122	0.000408339	0.00188802	Up
ENSSSCG00000009793	41.2924	12.8495	1.61835	4.45854e-21	1.47739e-19	Up
ENSSSCG00000009794	19.2718	0.756775	4.60467	1.19398e-16	3.19556e-15	Up
ENSSSCG00000009856	3.46891	0.891614	1.89418	0.000760024	0.00318277	Up
ENSSSCG00000009994	10.8583	4.97454	1.06035	5.2568e-05	0.000304727	Up
ENSSSCG00000010095	49.69	21.1636	1.16556	1.58268e-13	3.22339e-12	Up
ENSSSCG00000010143	2.88374	0.494138	2.47914	7.80238e-05	0.000432619	Up
ENSSSCG00000010200	9.42894	3.44342	1.38744	0.00023765	0.00118404	Up
ENSSSCG00000010219	33.28	1.12016	4.82707	1.46841e-58	9.88848e-57	Up
ENSSSCG00000010247	9.90344	4.38671	1.10898	0.000490483	0.00219287	Up
ENSSSCG00000010303	117.717	21.199	2.40744	7.90877e-49	4.78556e-47	Up
ENSSSCG00000010316	4.46147	0.865669	2.29982	2.48892e-06	2.03758e-05	Up
ENSSSCG00000010319	11.4155	3.19393	1.77178	3.80723e-08	4.51585e-07	Up
ENSSSCG00000010329	10.5346	4.48679	1.16556	0.000224429	0.00112353	Up
ENSSSCG00000010359	20.7004	3.71599	2.41203	7.59483e-08	8.4559e-07	Up
ENSSSCG00000010389	346.489	100.624	1.71802	2.52412e-135	2.92739e-133	Up
ENSSSCG00000010461	880.067	277.909	1.59719	1.7834e-122	2.01243e-120	Up
ENSSSCG00000010494	35.5332	11.284	1.58908	3.27442e-22	1.14884e-20	Up
ENSSSCG00000010495	8.38292	0.303862	4.72015	4.32345e-08	5.0142e-07	Up
ENSSSCG00000010513	2.95033	0	4.42792	0.000793617	0.00329372	Up
ENSSSCG00000010594	13.7477	2.06125	2.67179	3.95822e-05	0.000237787	Up
ENSSSCG00000010863	3.71578	0.750409	2.2421	2.5422e-05	0.000159371	Up
ENSSSCG00000010904	14.8793	0	4.69096	0.000201593	0.00102519	Up
ENSSSCG00000010974	16.6198	5.59402	1.50514	0.0011267	0.00439642	Up
ENSSSCG00000011076	172.848	34.907	2.2421	5.28887e-23	1.88734e-21	Up
ENSSSCG00000011081	15.7385	4.30146	1.80559	8.59001e-07	7.79667e-06	Up
ENSSSCG00000011101	35.7882	14.4161	1.24599	2.14865e-09	3.041e-08	Up
ENSSSCG00000011106	96.9173	38.5212	1.26529	1.64718e-16	4.35269e-15	Up
ENSSSCG00000011166	8.03697	1.32552	2.53429	0.000138091	0.000729815	Up
ENSSSCG00000011201	3.08325	0.242149	3.60467	2.23161e-05	0.000143124	Up
ENSSSCG00000011208	12.7912	2.29044	2.41564	4.32845e-09	5.94472e-08	Up
ENSSSCG00000011264	13.8717	3.43173	1.94932	3.77566e-06	2.99696e-05	Up
ENSSSCG00000011265	1828.91	333.472	2.38953	0	0	Up
ENSSSCG00000011414	26.6118	1.56751	4.01971	3.45645e-05	0.000210368	Up
ENSSSCG00000011500	21.3173	4.20496	2.27605	9.7124e-14	2.00747e-12	Up
ENSSSCG00000011508	754.793	346.508	1.05738	3.00923e-59	2.05968e-57	Up
ENSSSCG00000011511	2.83095	0.333502	3.01971	0.00019982	0.0010224	Up
ENSSSCG00000011534	55.2258	7.66766	2.78267	2.926e-21	9.77321e-20	Up
ENSSSCG00000011646	55.0918	16.6195	1.66315	5.30429e-22	1.83027e-20	Up
ENSSSCG00000011752	4.55534	0.804965	2.43475	4.4004e-05	0.000262838	Up
ENSSSCG00000011775	12.087	3.66148	1.65714	2.03511e-05	0.000132351	Up
ENSSSCG00000011885	53.2364	15.7286	1.69321	6.99224e-14	1.45969e-12	Up
ENSSSCG00000011917	70.0238	28.161	1.24834	6.71828e-09	8.90473e-08	Up
ENSSSCG00000011972	27.2114	11.8843	1.12934	6.02395e-06	4.57291e-05	Up
ENSSSCG00000012022	31.0693	5.53482	2.42307	5.01338e-14	1.06252e-12	Up
ENSSSCG00000012068	27.3556	7.87756	1.73021	4.89749e-05	0.000287858	Up
ENSSSCG00000012427	148.33	58.2468	1.28275	1.23663e-06	1.08926e-05	Up
ENSSSCG00000012534	149.857	61.0406	1.22993	7.28982e-09	9.60131e-08	Up
ENSSSCG00000012624	12.153	3.43606	1.75668	0.000181046	0.000930906	Up
ENSSSCG00000012663	8.6269	3.31633	1.31344	0.000573969	0.00249626	Up
ENSSSCG00000013155	44.2392	14.2837	1.56515	3.36696e-06	2.68788e-05	Up
ENSSSCG00000013179	15.1871	3.30299	2.13519	8.07296e-05	0.000447028	Up
ENSSSCG00000013312	36.1613	16.5302	1.06353	2.72717e-13	5.37094e-12	Up
ENSSSCG00000013405	41.1545	19.3929	1.01971	7.82915e-07	7.16841e-06	Up
ENSSSCG00000014173	3.06561	0.361145	3.01971	0.00127763	0.00487977	Up
ENSSSCG00000014217	9.17554	0.308836	4.82707	5.49641e-05	0.000314983	Up
ENSSSCG00000014269	8.33179	2.73121	1.54327	2.16089e-05	0.000139877	Up
ENSSSCG00000014336	11.066	1.62954	2.69778	6.3152e-07	5.89865e-06	Up
ENSSSCG00000014347	56.8524	25.7727	1.07557	1.39871e-09	2.05628e-08	Up
ENSSSCG00000014362	26.5672	2.43426	3.38228	4.77613e-09	6.5167e-08	Up
ENSSSCG00000014865	25.9753	11.3334	1.13074	0.000237029	0.00118236	Up
ENSSSCG00000014878	23.8365	8.49621	1.42247	1.7499e-07	1.8311e-06	Up
ENSSSCG00000014903	7.8106	2.92277	1.35229	0.000879098	0.00355656	Up
ENSSSCG00000014924	31.8465	11.1161	1.45267	1.0254e-05	7.25631e-05	Up
ENSSSCG00000015014	6.53693	0	5.10599	1.40748e-05	9.6652e-05	Up
ENSSSCG00000015052	15.016	1.9997	2.84283	8.79632e-10	1.33065e-08	Up
ENSSSCG00000015099	7.19097	2.29225	1.58361	1.46426e-07	1.5556e-06	Up
ENSSSCG00000015129	8.70593	3.60348	1.2068	6.28078e-06	4.742e-05	Up
ENSSSCG00000015274	19.4349	0.528355	5.13519	4.74895e-15	1.08943e-13	Up
ENSSSCG00000015334	646.814	208.818	1.56529	1.46928e-184	2.35942e-182	Up
ENSSSCG00000015402	9.77191	1.48977	2.64774	3.66533e-07	3.60079e-06	Up
ENSSSCG00000015407	4.45926	0.525324	3.01971	0.00127763	0.00487977	Up
ENSSSCG00000015480	4.48618	1.93016	1.15096	0.000586191	0.00253621	Up
ENSSSCG00000015545	360.061	107.971	1.67179	1.1277e-62	8.26021e-61	Up
ENSSSCG00000015583	48.9634	17.5929	1.4109	1.43992e-07	1.53387e-06	Up
ENSSSCG00000015595	379.309	103.719	1.80489	9.06368e-77	7.42007e-75	Up
ENSSSCG00000016156	22.0876	7.80609	1.43475	4.03044e-06	3.16907e-05	Up
ENSSSCG00000016216	77.8239	36.6723	1.01971	1.52583e-06	1.31115e-05	Up
ENSSSCG00000016398	2.16107	0	4.69096	0.000201593	0.00102519	Up
ENSSSCG00000016548	12.6602	5.70256	1.08481	6.3794e-05	0.000359933	Up
ENSSSCG00000016567	8.18974	2.67998	1.54578	0.000168668	0.000875891	Up
ENSSSCG00000016605	89.2575	24.1688	1.81901	5.68315e-16	1.44683e-14	Up
ENSSSCG00000016635	11.4806	4.05744	1.43475	0.000761298	0.00318491	Up
ENSSSCG00000016653	53.7942	23.731	1.11487	1.59646e-06	1.36308e-05	Up
ENSSSCG00000016792	105.748	18.8812	2.4198	6.54912e-79	5.69659e-77	Up
ENSSSCG00000016866	18.1806	0.803166	4.43475	1.92926e-09	2.74914e-08	Up
ENSSSCG00000016877	35.7509	14.1866	1.26764	6.15228e-09	8.23294e-08	Up
ENSSSCG00000016929	31.0515	10.7189	1.4687	2.10471e-15	5.13889e-14	Up
ENSSSCG00000017094	13.2743	5.18516	1.29036	1.52621e-06	1.31115e-05	Up
ENSSSCG00000017252	10.8747	0	4.69096	0.000201593	0.00102519	Up
ENSSSCG00000017282	19.2221	8.01997	1.19528	3.25306e-07	3.23382e-06	Up
ENSSSCG00000017354	17.3396	3.40449	2.28275	8.16668e-05	0.000450426	Up
ENSSSCG00000017477	26.4575	11.7425	1.10613	5.04445e-06	3.90749e-05	Up
ENSSSCG00000017505	6.69883	0.946989	2.75668	1.08309e-06	9.60104e-06	Up
ENSSSCG00000017558	234.809	67.7838	1.72666	7.48889e-24	2.7189e-22	Up
ENSSSCG00000017783	23.527	8.68437	1.37201	7.99336e-06	5.85501e-05	Up
ENSSSCG00000017785	6.37243	0.85795	2.82707	0.000744765	0.00312828	Up
ENSSSCG00000017791	15.7783	1.11526	3.75668	4.06644e-15	9.4737e-14	Up
ENSSSCG00000018061	5960.86	1703.24	1.74143	0	0	Up
ENSSSCG00000018063	5874.68	2250.75	1.31829	0	0	Up
ENSSSCG00000018072	469.788	124.523	1.84979	6.35063e-05	0.000359248	Up
ENSSSCG00000018080	6541.62	3087.64	1.01733	3.30045e-58	2.18729e-56	Up
ENSSSCG00000018086	1579.3	445.473	1.76007	2.53815e-45	1.39436e-43	Up
ENSSSCG00000020149	13241.6	5781.9	1.12965	4.0507e-102	3.9331e-100	Up
ENSSSCG00000020757	12.6866	4.87695	1.31344	0.000573969	0.00249626	Up
ENSSSCG00000020775	53.2509	2.70232	4.23472	5.04745e-33	2.36785e-31	Up
ENSSSCG00000020803	14.246	2.82653	2.26764	7.88952e-07	7.19215e-06	Up
ENSSSCG00000020909	15.8427	1.65898	3.18964	5.31477e-05	0.000306916	Up
ENSSSCG00000020940	5.49068	1.20742	2.11925	2.49125e-05	0.000157597	Up
ENSSSCG00000020979	103.155	31.7013	1.63638	9.80409e-06	6.97336e-05	Up
ENSSSCG00000021038	22.2053	0.59792	5.14899	9.81637e-20	3.03592e-18	Up
ENSSSCG00000021042	6.39689	0.753587	3.01971	0.00019982	0.0010224	Up
ENSSSCG00000021356	797518	20071.1	5.24651	0	0	Up
ENSSSCG00000021429	4.7217	0.599029	2.9128	3.12486e-06	2.509e-05	Up
ENSSSCG00000021454	7.65595	1.80382	2.01971	0.000455736	0.00206374	Up
ENSSSCG00000021586	26.2471	7.62704	1.71715	1.83069e-07	1.90609e-06	Up
ENSSSCG00000021595	86.358	27.6136	1.57914	1.92272e-06	1.61523e-05	Up
ENSSSCG00000021646	46.2467	14.7215	1.58562	2.15388e-18	6.15946e-17	Up
ENSSSCG00000021732	9.15374	0	4.91335	5.26227e-05	0.000304727	Up
ENSSSCG00000021779	159.984	69.475	1.13755	3.87802e-07	3.79189e-06	Up
ENSSSCG00000021976	2.30408	0.135717	4.01971	3.94079e-07	3.8353e-06	Up
ENSSSCG00000021977	18.773	8.3101	1.10991	6.13533e-05	0.000347571	Up
ENSSSCG00000022111	131.858	61.1557	1.04261	6.41637e-14	1.3462e-12	Up
ENSSSCG00000022300	32.3477	15.4383	1.00133	5.59064e-05	0.000319313	Up
ENSSSCG00000022410	9.84349	0.662637	3.82707	0.000135476	0.000719637	Up
ENSSSCG00000022479	8.05554	3.09669	1.31344	0.000573969	0.00249626	Up
ENSSSCG00000022828	10.0933	2.93765	1.71486	8.75406e-05	0.000480916	Up
ENSSSCG00000022845	14.336	5.58056	1.29535	0.000176232	0.000910002	Up
ENSSSCG00000022895	5.13716	0.134485	5.18964	3.96398e-06	3.12859e-05	Up
ENSSSCG00000023010	2.37965	0.112134	4.34164	0.000837293	0.00342058	Up
ENSSSCG00000023105	6.73777	0.529164	3.60467	0.000535706	0.00234697	Up
ENSSSCG00000023297	22.5264	9.81077	1.13337	4.68272e-05	0.000277715	Up
ENSSSCG00000023408	23.1528	9.21981	1.26257	9.91061e-11	1.62907e-09	Up
ENSSSCG00000023586	6.0069	0	4.42792	0.000793617	0.00329372	Up
ENSSSCG00000023760	25.2606	8.75245	1.46332	0.00043365	0.00198092	Up
ENSSSCG00000023784	10.5554	2.33154	2.11282	1.3872e-05	9.55738e-05	Up
ENSSSCG00000023873	18.2216	7.19741	1.27428	6.59625e-06	4.94442e-05	Up
ENSSSCG00000023963	74.8672	23.1138	1.62977	7.37694e-07	6.82925e-06	Up
ENSSSCG00000023975	17.2768	3.44435	2.26072	4.55431e-05	0.000270736	Up
ENSSSCG00000024087	265.317	4.25425	5.89686	0	0	Up
ENSSSCG00000024465	31.8398	14.4802	1.07094	8.46813e-06	6.15955e-05	Up
ENSSSCG00000024517	31.8803	5.25793	2.53429	2.47412e-14	5.38014e-13	Up
ENSSSCG00000024527	10.9981	4.94699	1.08683	0.00127863	0.00487977	Up
ENSSSCG00000024626	11.6576	4.66933	1.25418	0.000635066	0.0027167	Up
ENSSSCG00000024696	24.0289	9.49663	1.27347	1.70108e-05	0.000114001	Up
ENSSSCG00000024748	17.9035	6.19556	1.46512	1.35261e-06	1.17653e-05	Up
ENSSSCG00000024853	191606	2070.49	6.46622	0	0	Up
ENSSSCG00000024866	13.9272	4.2465	1.64774	0.000133957	0.000713381	Up
ENSSSCG00000025115	8.2965	0.279249	4.82707	5.49641e-05	0.000314983	Up
ENSSSCG00000025127	8.58659	0.311245	4.72015	4.32345e-08	5.0142e-07	Up
ENSSSCG00000025136	8.07528	0	5.42792	1.07349e-06	9.53616e-06	Up
ENSSSCG00000025162	1.87494e+06	25024.9	6.16152	0	0	Up
ENSSSCG00000025240	93.2288	39.0081	1.19119	2.35232e-15	5.71007e-14	Up
ENSSSCG00000025355	11.6979	1.72259	2.69778	0.000427798	0.00195633	Up
ENSSSCG00000025668	13.0149	0	4.42792	0.000793617	0.00329372	Up
ENSSSCG00000025698	11.9622	0.768659	3.89418	1.50795e-06	1.30081e-05	Up
ENSSSCG00000025729	36.643	17.4062	1.00812	3.2741e-07	3.24701e-06	Up
ENSSSCG00000025901	10.7138	4.20714	1.28275	0.000142171	0.000748533	Up
ENSSSCG00000025924	20.2262	5.75833	1.74669	2.37961e-06	1.95576e-05	Up
ENSSSCG00000025973	17.6507	6.7331	1.32457	0.000269993	0.00131077	Up
ENSSSCG00000026113	3.90826	0.167423	4.47914	6.08375e-07	5.72087e-06	Up
ENSSSCG00000026196	6.20221	2.35433	1.33166	0.000710913	0.00299816	Up
ENSSSCG00000026224	2.883	0.566054	2.28275	8.16668e-05	0.000450426	Up
ENSSSCG00000026249	374.721	114.896	1.63968	3.07028e-15	7.28347e-14	Up
ENSSSCG00000026344	2.56658	0.659688	1.89418	0.000760024	0.00318277	Up
ENSSSCG00000026362	12.9199	2.70584	2.18964	0.000869397	0.00352415	Up
ENSSSCG00000026430	23.5496	3.62354	2.63442	7.20454e-18	2.00534e-16	Up
ENSSSCG00000026610	76.6911	22.3714	1.71159	1.33445e-05	9.25508e-05	Up
ENSSSCG00000026946	43.0945	4.06141	3.34164	1.40593e-05	9.6652e-05	Up
ENSSSCG00000026968	15.5175	6.51735	1.18572	0.000439898	0.00200507	Up
ENSSSCG00000027046	5.25739	0.281522	4.15722	4.17141e-12	7.60537e-11	Up
ENSSSCG00000027055	4.20838	0.901398	2.15722	0.00026362	0.00128732	Up
ENSSSCG00000027191	32.6241	2.5622	3.60467	0.000535706	0.00234697	Up
ENSSSCG00000027314	1.81574	0	4.42792	0.000793617	0.00329372	Up
ENSSSCG00000027344	130.937	4.67428	4.74218	2.47518e-18	7.03011e-17	Up
ENSSSCG00000027613	167.476	68.004	1.23445	2.26205e-07	2.30917e-06	Up
ENSSSCG00000027628	8.30296	2.06495	1.94171	1.21265e-05	8.46656e-05	Up
ENSSSCG00000027669	49.6988	3.62439	3.71159	2.16062e-20	6.93918e-19	Up
ENSSSCG00000027864	48.4436	0.773818	5.90235	2.02198e-32	9.17617e-31	Up
ENSSSCG00000027969	133.632	2.63947	5.59606	9.31633e-262	1.69118e-259	Up
ENSSSCG00000028168	96.4742	38.0486	1.27649	1.53574e-07	1.61918e-06	Up
ENSSSCG00000028255	231.803	0	4.69096	0.000201593	0.00102519	Up
ENSSSCG00000028304	33.3141	11.6936	1.4446	3.21849e-09	4.46436e-08	Up
ENSSSCG00000028322	202.203	75.8015	1.34969	9.28319e-37	4.72669e-35	Up
ENSSSCG00000028703	6.13217	2.32774	1.33166	0.000710913	0.00299816	Up
ENSSSCG00000028753	28.8331	6.79339	2.01971	2.35973e-05	0.000150187	Up
ENSSSCG00000028828	14.995	3.91153	1.87287	9.65456e-08	1.04428e-06	Up
ENSSSCG00000029204	47.1044	2.77457	4.01971	3.45645e-05	0.000210368	Up
ENSSSCG00000029251	198.118	21.8361	3.11576	4.04168e-116	4.4407e-114	Up
ENSSSCG00000029311	18.8929	4.84412	1.89772	3.09322e-09	4.3049e-08	Up
ENSSSCG00000029613	469.823	20.0364	4.48561	0	0	Up
ENSSSCG00000029762	13.9155	3.48356	1.93225	6.03391e-09	8.1005e-08	Up
ENSSSCG00000029846	208.823	49.2008	2.01971	1.26492e-09	1.87945e-08	Up
ENSSSCG00000029849	17.2491	1.35469	3.60467	2.23161e-05	0.000143124	Up
ENSSSCG00000029864	30.2793	1.29711	4.47914	1.72753e-12	3.2344e-11	Up
ENSSSCG00000029954	9.50833	1.79221	2.34164	0.000263303	0.00128728	Up
ENSSSCG00000030070	75.7903	12.8967	2.4892	1.7533e-18	5.08354e-17	Up
ENSSSCG00000030095	38.0871	3.26318	3.47914	5.9981e-11	1.02047e-09	Up
ENSSSCG00000030165	48.134	12.7585	1.84979	4.2904e-12	7.78831e-11	Up
ENSSSCG00000030268	137.871	63.2874	1.05751	2.18398e-30	9.4005e-29	Up
ENSSSCG00000030289	18.0935	8.08197	1.09688	1.66305e-06	1.41704e-05	Up
ENSSSCG00000030395	284.989	40.1076	2.76315	1.64541e-156	2.21608e-154	Up
ENSSSCG00000030396	51.0045	10.526	2.21085	5.15291e-39	2.68928e-37	Up
ENSSSCG00000030460	5.29613	0.249565	4.34164	0.000837293	0.00342058	Up
ENSSSCG00000030529	9.93628	1.75582	2.43475	0.000850863	0.00345909	Up
ENSSSCG00000030708	40.1299	7.48523	2.35675	1.02564e-15	2.5642e-14	Up
ENSSSCG00000000007	0.688596	5.02945	-2.93448	0.000602429	0.00259571	Down
ENSSSCG00000000033	0	18.8317	-4.94426	6.80062e-05	0.000382149	Down
ENSSSCG00000000059	3.1838	18.5034	-2.60478	6.80299e-07	6.32597e-06	Down
ENSSSCG00000000114	8.35326	22.3873	-1.48808	0.000180973	0.000930906	Down
ENSSSCG00000000116	16.3121	54.767	-1.81318	0.000579169	0.00250843	Down
ENSSSCG00000000138	86.4387	175.534	-1.08782	4.76134e-05	0.000281577	Down
ENSSSCG00000000158	5.8948	16.4681	-1.54797	0.000226091	0.00112914	Down
ENSSSCG00000000185	13.3059	31.3501	-1.30222	0.000425487	0.00195625	Down
ENSSSCG00000000190	14.7794	34.5052	-1.28904	0.000264265	0.00128896	Down
ENSSSCG00000000214	912.311	2136.24	-1.29329	1.764e-148	2.30156e-146	Down
ENSSSCG00000000264	3.25518	15.7226	-2.33784	0.000530182	0.00232765	Down
ENSSSCG00000000268	0.51827	5.37284	-3.43972	1.06334e-05	7.49937e-05	Down
ENSSSCG00000000276	5.07695	16.1485	-1.73518	0.00118099	0.00459107	Down
ENSSSCG00000000384	4.45174	17.8309	-2.06775	0.000359279	0.00168167	Down
ENSSSCG00000000405	245.512	583.15	-1.31389	2.10361e-56	1.35122e-54	Down
ENSSSCG00000000606	66.4292	256.683	-2.01591	5.84969e-19	1.75708e-17	Down
ENSSSCG00000000684	10.9219	23.1598	-1.15021	0.000140284	0.000739533	Down
ENSSSCG00000000735	3.70462	10.9729	-1.63236	7.6428e-05	0.000424334	Down
ENSSSCG00000000746	1.40174	17.504	-3.70821	6.33375e-07	5.90278e-06	Down
ENSSSCG00000000921	24.227	11.6541	0.989965	9.36201e-06	6.71613e-05	Down
ENSSSCG00000001000	23.2882	53.333	-1.26124	8.84762e-08	9.72111e-07	Down
ENSSSCG00000001005	41.4379	154.817	-1.96735	3.61714e-07	3.57024e-06	Down
ENSSSCG00000001064	102.528	222.312	-1.18238	2.65711e-16	6.93365e-15	Down
ENSSSCG00000001413	10.5365	24.2734	-1.26979	0.00120785	0.00467809	Down
ENSSSCG00000001418	0.406222	3.63699	-3.22822	6.91317e-05	0.000387952	Down
ENSSSCG00000001505	18.7895	60.2073	-1.74582	0.000256038	0.00125765	Down
ENSSSCG00000001506	6.48639	17.0019	-1.45602	0.000273151	0.00132303	Down
ENSSSCG00000001512	53.2058	143.466	-1.49686	1.5166e-08	1.89582e-07	Down
ENSSSCG00000001533	24.4851	49.7572	-1.08881	0.000379345	0.00176537	Down
ENSSSCG00000001596	1.58884	11.6048	-2.93448	1.22531e-06	1.08158e-05	Down
ENSSSCG00000001770	1.5969	11.2874	-2.88718	0.000818674	0.00337675	Down
ENSSSCG00000001876	31.0432	78.1696	-1.39814	1.04169e-06	9.27338e-06	Down
ENSSSCG00000001929	6.67059	16.6989	-1.38968	0.000612052	0.00262633	Down
ENSSSCG00000001930	3156.2	6672.14	-1.14577	0	0	Down
ENSSSCG00000002294	6.57174	16.3283	-1.37884	6.97212e-05	0.000390735	Down
ENSSSCG00000002550	431.617	1123.82	-1.4464	1.42381e-36	7.07693e-35	Down
ENSSSCG00000002704	27.8209	83.1967	-1.64617	1.27018e-14	2.83595e-13	Down
ENSSSCG00000002723	4.40867	14.8884	-1.82159	2.22466e-05	0.000143124	Down
ENSSSCG00000002749	3.39835	69.2594	-4.41492	1.97618e-21	6.65393e-20	Down
ENSSSCG00000002790	8.54643	38.2589	-2.22822	7.40085e-05	0.000411997	Down
ENSSSCG00000002799	1.34509	4.48965	-1.80472	2.81376e-05	0.000175081	Down
ENSSSCG00000002873	541.012	1151.85	-1.15604	2.51402e-84	2.28184e-82	Down
ENSSSCG00000002925	6.48639	25.5984	-2.04638	4.88028e-05	0.00028739	Down
ENSSSCG00000002956	40.0804	83.6412	-1.12713	4.02171e-08	4.70344e-07	Down
ENSSSCG00000003081	3.46247	19.987	-2.595	5.50727e-05	0.000314983	Down
ENSSSCG00000003088	21.9813	119.589	-2.50954	2.16674e-19	6.65183e-18	Down
ENSSSCG00000003089	4.67048	21.4581	-2.26569	0.000922003	0.0036979	Down
ENSSSCG00000003090	10.4697	29.0531	-1.53828	3.36239e-05	0.000205241	Down
ENSSSCG00000003109	28.6985	78.4353	-1.51634	1.48387e-07	1.57243e-06	Down
ENSSSCG00000003156	9.08719	21.1725	-1.2861	0.00100141	0.0039556	Down
ENSSSCG00000003193	15.9401	36.0544	-1.24332	2.62915e-06	2.13979e-05	Down
ENSSSCG00000003201	2.75266	21.7266	-3.04638	2.75579e-07	2.7792e-06	Down
ENSSSCG00000003217	4.88277	23.5839	-2.33784	0.000530182	0.00232765	Down
ENSSSCG00000003218	139.482	330.769	-1.31155	1.53702e-65	1.16679e-63	Down
ENSSSCG00000003261	128.166	312.954	-1.35375	3.94395e-08	4.65159e-07	Down
ENSSSCG00000003263	4.17465	14.0162	-1.81318	0.000579169	0.00250843	Down
ENSSSCG00000003288	0.987945	12.5696	-3.73518	4.62789e-07	4.45212e-06	Down
ENSSSCG00000003385	115.676	250.338	-1.1796	5.13046e-13	1.00096e-11	Down
ENSSSCG00000003432	5.47599	18.2471	-1.80229	6.31988e-06	4.76291e-05	Down
ENSSSCG00000003433	5.95009	16.8229	-1.56525	7.72403e-06	5.69772e-05	Down
ENSSSCG00000003566	13.2359	34.6936	-1.45602	0.000273151	0.00132303	Down
ENSSSCG00000003594	89.8828	240.01	-1.48279	0.00124867	0.00480053	Down
ENSSSCG00000003595	34.6337	78.2007	-1.24082	0.000283898	0.00136087	Down
ENSSSCG00000003634	2.58314	15.5197	-2.65271	3.09338e-05	0.000190774	Down
ENSSSCG00000003653	145.729	328.093	-1.23663	3.85245e-10	6.04684e-09	Down
ENSSSCG00000003867	11.4865	28.9966	-1.40175	0.00119142	0.00462732	Down
ENSSSCG00000003901	0	5.36218	-4.73014	0.000242923	0.00119969	Down
ENSSSCG00000003904	3.00154	11.1972	-1.96518	2.55744e-06	2.08958e-05	Down
ENSSSCG00000003922	4.97095	26.157	-2.46141	4.84355e-06	3.75885e-05	Down
ENSSSCG00000004012	1.5478	12.3079	-3.0571	2.71109e-13	5.36457e-12	Down
ENSSSCG00000004094	83.7499	207.306	-1.37341	3.76651e-28	1.52677e-26	Down
ENSSSCG00000004163	14.3769	7.16182	0.939542	0.000278089	0.00134072	Down
ENSSSCG00000004480	41.9897	103.329	-1.36495	0.000383869	0.00177882	Down
ENSSSCG00000004489	254.917	796.553	-1.70956	4.0162e-113	4.19207e-111	Down
ENSSSCG00000004499	118.829	269.549	-1.24747	1.46716e-24	5.42091e-23	Down
ENSSSCG00000004557	0	21.2991	-4.73014	0.000242923	0.00119969	Down
ENSSSCG00000004814	25.6958	69.0179	-1.49125	2.69546e-05	0.000168473	Down
ENSSSCG00000004862	23.527	55.4322	-1.30222	0.000425487	0.00195625	Down
ENSSSCG00000005003	161.04	333.543	-1.11627	1.838e-09	2.62806e-08	Down
ENSSSCG00000005041	21.7867	10.4638	0.992231	0.00108659	0.00427183	Down
ENSSSCG00000005105	12.9919	40.3036	-1.69911	0.000112303	0.000605673	Down
ENSSSCG00000005302	8.39973	25.0682	-1.64325	0.000220462	0.00110766	Down
ENSSSCG00000005303	0	2.93133	-4.40821	0.00123371	0.00475483	Down
ENSSSCG00000005477	0	2.74332	-4.60984	0.000463138	0.0020837	Down
ENSSSCG00000005518	20.4068	10.1817	0.93725	0.000349096	0.00164322	Down
ENSSSCG00000005528	113.068	284.16	-1.39533	2.971e-15	7.08822e-14	Down
ENSSSCG00000005596	25.0501	60.6303	-1.34104	0.000124289	0.000666999	Down
ENSSSCG00000005621	8.54485	27.898	-1.77285	1.00432e-05	7.13129e-05	Down
ENSSSCG00000005627	829.176	1843.41	-1.21844	4.04103e-114	4.32614e-112	Down
ENSSSCG00000005628	35.2863	128.403	-1.9293	2.27008e-22	8.03217e-21	Down
ENSSSCG00000005649	22.3693	89.3046	-2.06303	2.95684e-18	8.28542e-17	Down
ENSSSCG00000005663	2.21989	9.93755	-2.22822	0.0012131	0.00468971	Down
ENSSSCG00000005672	41.3289	118.688	-1.58776	9.28664e-26	3.52484e-24	Down
ENSSSCG00000005678	13.2899	30.0598	-1.24332	0.000894303	0.00360759	Down
ENSSSCG00000005759	27.2741	54.7405	-1.07089	6.12645e-06	4.63386e-05	Down
ENSSSCG00000005777	32.9378	70.9532	-1.17293	0.000261522	0.00128308	Down
ENSSSCG00000005787	0	4.74915	-4.67124	0.000335166	0.00158479	Down
ENSSSCG00000005826	173.396	351.344	-1.08462	1.2773e-06	1.11787e-05	Down
ENSSSCG00000005900	9.57447	24.2504	-1.40655	0.000501325	0.00223623	Down
ENSSSCG00000005901	2.07259	9.76649	-2.30222	0.000699677	0.00296274	Down
ENSSSCG00000005914	0	12.2406	-5.04048	3.62761e-05	0.000219187	Down
ENSSSCG00000005917	14.787	30.2838	-1.10003	0.00117457	0.0045704	Down
ENSSSCG00000005976	261.916	542.81	-1.11715	1.22919e-20	4.00942e-19	Down
ENSSSCG00000006032	3.88725	17.8596	-2.26569	0.000922003	0.0036979	Down
ENSSSCG00000006070	93.9742	228.794	-1.34952	1.66745e-10	2.6984e-09	Down
ENSSSCG00000006166	47.1404	124.29	-1.46449	2.82517e-09	3.96916e-08	Down
ENSSSCG00000006246	141.162	465.63	-1.78764	9.40426e-08	1.02251e-06	Down
ENSSSCG00000006325	13.5377	46.2495	-1.83827	1.75688e-05	0.000116248	Down
ENSSSCG00000006358	24.7298	51.0521	-1.11153	2.93362e-05	0.000181457	Down
ENSSSCG00000006395	15.2733	37.294	-1.35375	0.000102622	0.000557896	Down
ENSSSCG00000006499	6.82196	23.1455	-1.82828	9.99116e-05	0.000543869	Down
ENSSSCG00000006512	4.21595	23.5086	-2.54507	1.58523e-06	1.35891e-05	Down
ENSSSCG00000006520	25.1832	54.7194	-1.1854	2.72613e-05	0.000169881	Down
ENSSSCG00000006528	12.9791	63.1992	-2.34952	1.91786e-05	0.000125311	Down
ENSSSCG00000006535	13.7633	38.1027	-1.53488	9.66419e-05	0.000528828	Down
ENSSSCG00000006581	36.3488	144.639	-2.05829	1.113e-34	5.467e-33	Down
ENSSSCG00000006630	23.1455	51.4171	-1.21733	0.000130022	0.00069331	Down
ENSSSCG00000006754	94.1483	225.816	-1.32795	3.04289e-30	1.29638e-28	Down
ENSSSCG00000006777	38.258	76.7992	-1.07114	1.34571e-05	9.30226e-05	Down
ENSSSCG00000006859	0	4.28273	-4.84117	0.000128171	0.000686073	Down
ENSSSCG00000006954	19.9388	58.7224	-1.62414	2.96667e-10	4.70964e-09	Down
ENSSSCG00000007116	1.01325	3.74014	-1.94991	0.00100044	0.00395548	Down
ENSSSCG00000007160	43.2527	101.908	-1.30222	9.08437e-08	9.90669e-07	Down
ENSSSCG00000007168	2.97451	12.1477	-2.09577	0.000277054	0.00133728	Down
ENSSSCG00000007265	29.2553	63.6024	-1.18619	3.45183e-06	2.75037e-05	Down
ENSSSCG00000007275	23.2292	49.8047	-1.16615	1.47989e-05	0.000100631	Down
ENSSSCG00000007279	139.712	300.961	-1.17293	2.55718e-10	4.09067e-09	Down
ENSSSCG00000007281	163.463	328.093	-1.07095	3.20153e-19	9.75686e-18	Down
ENSSSCG00000007308	106.003	234.447	-1.21097	1.54615e-08	1.92699e-07	Down
ENSSSCG00000007492	4.38671	16.0201	-1.93448	4.16589e-06	3.25717e-05	Down
ENSSSCG00000007545	20.8055	44.1179	-1.15021	7.24481e-08	8.10945e-07	Down
ENSSSCG00000007546	7.89294	39.0528	-2.37261	5.57591e-07	5.29099e-06	Down
ENSSSCG00000007554	13.1079	44.2665	-1.82159	2.05548e-07	2.12425e-06	Down
ENSSSCG00000007577	1.7857	5.38535	-1.65836	0.000640946	0.00273357	Down
ENSSSCG00000007646	77.7638	205.706	-1.46922	1.01599e-09	1.52587e-08	Down
ENSSSCG00000007803	21.231	43.3529	-1.09577	0.000144785	0.000758468	Down
ENSSSCG00000007943	19.8033	61.1229	-1.69178	7.13498e-07	6.61993e-06	Down
ENSSSCG00000007984	46.5869	133.405	-1.58363	2.40856e-13	4.78864e-12	Down
ENSSSCG00000007992	7.0922	15.7074	-1.21295	0.0012857	0.0048938	Down
ENSSSCG00000007999	33.0084	77.2157	-1.29187	3.67357e-05	0.000221644	Down
ENSSSCG00000008008	45.8777	111.506	-1.34707	3.9218e-07	3.82573e-06	Down
ENSSSCG00000008009	4.0369	19.4983	-2.33784	0.000530182	0.00232765	Down
ENSSSCG00000008030	22.7414	49.5626	-1.18974	0.000579126	0.00250843	Down
ENSSSCG00000008061	151.176	353.812	-1.29257	1.48706e-09	2.16332e-08	Down
ENSSSCG00000008183	24.1403	57.509	-1.31816	0.000685322	0.00290786	Down
ENSSSCG00000008195	226.604	521.583	-1.26853	1.75602e-21	5.96072e-20	Down
ENSSSCG00000008245	134.613	322.855	-1.32788	9.65682e-13	1.85801e-11	Down
ENSSSCG00000008268	4.83984	23.5666	-2.34952	1.91786e-05	0.000125311	Down
ENSSSCG00000008368	29.2894	78.0823	-1.48043	4.31587e-22	1.50162e-20	Down
ENSSSCG00000008556	0	7.25437	-4.60984	0.000463138	0.0020837	Down
ENSSSCG00000008557	0.53025	3.99784	-2.98029	0.000442966	0.00201247	Down
ENSSSCG00000008559	4.79197	12.1115	-1.4035	4.71562e-05	0.000279269	Down
ENSSSCG00000008640	23.16	65.4809	-1.56525	9.60277e-07	8.62217e-06	Down
ENSSSCG00000008701	2.89183	13.9676	-2.33784	0.000530182	0.00232765	Down
ENSSSCG00000008723	3.86508	13.4321	-1.86293	0.000357235	0.00167521	Down
ENSSSCG00000008774	0.682831	5.79176	-3.15021	0.000128667	0.000686963	Down
ENSSSCG00000008948	0	25.5004	-6.74449	9.38128e-14	1.94867e-12	Down
ENSSSCG00000009281	28.9754	88.7498	-1.68073	7.3007e-08	8.15016e-07	Down
ENSSSCG00000009545	12.8492	26.1782	-1.0925	1.96089e-07	2.03153e-06	Down
ENSSSCG00000009585	44.0426	127.117	-1.595	1.21864e-12	2.33396e-11	Down
ENSSSCG00000009616	5.36124	16.1054	-1.65271	1.40497e-07	1.50409e-06	Down
ENSSSCG00000009631	177.864	421.728	-1.31135	4.46629e-19	1.35127e-17	Down
ENSSSCG00000009668	4.12899	18.8081	-2.25331	5.66205e-05	0.00032207	Down
ENSSSCG00000009759	0.857861	5.86151	-2.83827	0.00111162	0.00434974	Down
ENSSSCG00000009904	46.8538	144.246	-1.68811	1.40999e-09	2.06559e-08	Down
ENSSSCG00000009930	6.67312	22.6405	-1.82828	9.99116e-05	0.000543869	Down
ENSSSCG00000010007	18.0174	64.1481	-1.89783	3.97725e-08	4.67344e-07	Down
ENSSSCG00000010063	13.2499	44.9541	-1.82828	9.99116e-05	0.000543869	Down
ENSSSCG00000010098	56.2844	120.456	-1.16351	2.22808e-06	1.85311e-05	Down
ENSSSCG00000010134	8.03697	24.8872	-1.6965	3.13729e-05	0.000192911	Down
ENSSSCG00000010135	2.00513	6.96833	-1.86293	0.000357235	0.00167521	Down
ENSSSCG00000010157	1.50316	10.979	-2.93448	0.000602429	0.00259571	Down
ENSSSCG00000010313	41.7386	20.4548	0.963128	3.7785e-10	5.95315e-09	Down
ENSSSCG00000010414	43.6065	125.858	-1.595	5.09667e-07	4.87478e-06	Down
ENSSSCG00000010526	21.0908	58.4614	-1.53668	1.25274e-08	1.58018e-07	Down
ENSSSCG00000010554	1.94569	9.7186	-2.38628	1.67402e-08	2.06785e-07	Down
ENSSSCG00000010678	7.41042	24.4436	-1.78764	3.5547e-05	0.000215406	Down
ENSSSCG00000010759	16.9005	46.9867	-1.541	1.17641e-05	8.22731e-05	Down
ENSSSCG00000010773	3.99226	11.4755	-1.5891	0.00125426	0.00481085	Down
ENSSSCG00000010774	5.82061	40.6848	-2.87106	9.08506e-09	1.16355e-07	Down
ENSSSCG00000010849	23.3904	11.316	0.981744	3.71104e-08	4.4143e-07	Down
ENSSSCG00000010947	301.034	928.987	-1.69154	2.19408e-100	2.08196e-98	Down
ENSSSCG00000010981	10.2425	39.215	-2.00266	8.09207e-05	0.000447493	Down
ENSSSCG00000011250	1.26632	8.95075	-2.88718	0.000818674	0.00337675	Down
ENSSSCG00000011266	135.036	289.607	-1.16656	1.43342e-09	2.09257e-08	Down
ENSSSCG00000011356	33.3235	122.023	-1.93836	2.66912e-20	8.50686e-19	Down
ENSSSCG00000011394	0	2.5622	-4.40821	0.00123371	0.00475483	Down
ENSSSCG00000011397	4.54985	16.7231	-1.94376	2.34182e-05	0.000149274	Down
ENSSSCG00000011801	0	5.54914	-4.40821	0.00123371	0.00475483	Down
ENSSSCG00000011848	11.3828	24.2403	-1.15637	1.02559e-06	9.14955e-06	Down
ENSSSCG00000011852	9.83093	40.9208	-2.12325	0.000213341	0.00107706	Down
ENSSSCG00000011928	3.91838	10.2872	-1.45834	0.000646105	0.00275265	Down
ENSSSCG00000012174	0	13.0452	-4.54571	0.000640972	0.00273357	Down
ENSSSCG00000012277	0	13.8285	-4.73014	0.000242923	0.00119969	Down
ENSSSCG00000012294	13.1079	51.4727	-2.03918	7.42836e-07	6.84649e-06	Down
ENSSSCG00000012295	7.05245	29.494	-2.13004	1.74973e-05	0.000115959	Down
ENSSSCG00000012766	3.30981	45.4899	-3.84654	4.6494e-20	1.45955e-18	Down
ENSSSCG00000012783	22.6191	54.4349	-1.3328	1.74503e-05	0.000115831	Down
ENSSSCG00000012784	65.0876	220.658	-1.82717	1.62636e-13	3.29627e-12	Down
ENSSSCG00000012846	22.1598	65.046	-1.61933	4.26909e-13	8.36815e-12	Down
ENSSSCG00000012849	3.89757	22.4986	-2.595	5.50727e-05	0.000314983	Down
ENSSSCG00000012874	8.6471	23.09	-1.48279	0.00124867	0.00480053	Down
ENSSSCG00000012896	5.60338	37.2961	-2.80047	1.65434e-10	2.68761e-09	Down
ENSSSCG00000012910	0	8.4137	-4.99317	4.96366e-05	0.000290253	Down
ENSSSCG00000012911	125.193	295.376	-1.30421	8.02471e-61	5.67872e-59	Down
ENSSSCG00000012926	12.1329	25.9661	-1.16351	0.000820903	0.00337675	Down
ENSSSCG00000012957	0	5.08339	-4.99317	4.96366e-05	0.000290253	Down
ENSSSCG00000012965	39.3237	155.368	-2.04803	2.30226e-13	4.62131e-12	Down
ENSSSCG00000012973	2.21431	7.82572	-1.88718	0.000279913	0.00134796	Down
ENSSSCG00000012978	1.9839	11.8415	-2.64325	3.85666e-07	3.77985e-06	Down
ENSSSCG00000012988	2.66763	7.75177	-1.60478	0.000343226	0.00161741	Down
ENSSSCG00000013005	9.64692	26.2419	-1.50954	7.70119e-06	5.69092e-05	Down
ENSSSCG00000013011	5.41951	19.5791	-1.91889	0.00128699	0.0048938	Down
ENSSSCG00000013013	40.7405	86.39	-1.15021	3.33453e-05	0.000204138	Down
ENSSSCG00000013022	3068.23	6313.2	-1.10678	0	0	Down
ENSSSCG00000013046	53.0208	108.266	-1.09577	0.000522876	0.0023126	Down
ENSSSCG00000013107	6.59038	17.7459	-1.49486	0.000426375	0.00195625	Down
ENSSSCG00000013114	0	2.1019	-4.78672	0.000176326	0.000910002	Down
ENSSSCG00000013176	13.3242	35.3888	-1.47505	1.42193e-05	9.72464e-05	Down
ENSSSCG00000013229	56.2527	127.47	-1.24597	8.14931e-10	1.24178e-08	Down
ENSSSCG00000013269	1.00127	4.16775	-2.12325	0.000213341	0.00107706	Down
ENSSSCG00000013293	19.8228	53.0733	-1.48664	1.1602e-05	8.15495e-05	Down
ENSSSCG00000013381	57.7435	128.629	-1.2213	1.46043e-06	1.26243e-05	Down
ENSSSCG00000013431	109.608	281.726	-1.42775	5.74184e-13	1.11503e-11	Down
ENSSSCG00000013432	24.5515	12.2119	0.941709	0.000221602	0.00111199	Down
ENSSSCG00000013436	351.887	716.755	-1.09218	2.15914e-12	4.02445e-11	Down
ENSSSCG00000013510	9.82606	23.6657	-1.33393	0.000565715	0.00246808	Down
ENSSSCG00000013513	1.16638	9.89323	-3.15021	0.000128667	0.000686963	Down
ENSSSCG00000013524	37.0729	75.119	-1.08462	0.000615667	0.00263893	Down
ENSSSCG00000013573	142.511	326.976	-1.26393	3.60155e-12	6.59519e-11	Down
ENSSSCG00000013601	37.0345	85.9148	-1.27985	2.73432e-08	3.28998e-07	Down
ENSSSCG00000013614	14.5917	39.5365	-1.50385	3.33159e-06	2.66474e-05	Down
ENSSSCG00000013615	49.3014	120.735	-1.35796	1.4283e-11	2.49514e-10	Down
ENSSSCG00000013622	6.00854	27.6057	-2.26569	0.000922003	0.0036979	Down
ENSSSCG00000013644	2.16989	5.55071	-1.42086	0.000973112	0.00387797	Down
ENSSSCG00000013651	7.85073	58.266	-2.95757	9.10109e-07	8.20702e-06	Down
ENSSSCG00000013669	63.4809	129.969	-1.09959	1.27047e-06	1.11672e-05	Down
ENSSSCG00000013721	118.623	273.755	-1.27231	1.42065e-11	2.4922e-10	Down
ENSSSCG00000013748	43.3612	90.4877	-1.12713	0.000516598	0.00229212	Down
ENSSSCG00000013755	0	6.51488	-4.73014	0.000242923	0.00119969	Down
ENSSSCG00000013757	62.5986	165.398	-1.46755	6.01164e-12	1.08188e-10	Down
ENSSSCG00000013780	129.537	373.627	-1.59405	3.78332e-30	1.59555e-28	Down
ENSSSCG00000013891	57.2279	152.094	-1.47598	5.79191e-11	9.91072e-10	Down
ENSSSCG00000013892	1.99649	20.227	-3.40655	8.70676e-10	1.32189e-08	Down
ENSSSCG00000013905	93.6613	191.167	-1.09512	1.03663e-16	2.79231e-15	Down
ENSSSCG00000013906	38.8325	98.3556	-1.40655	1.66219e-09	2.38484e-08	Down
ENSSSCG00000013936	121.942	259.422	-1.15492	2.41373e-08	2.92957e-07	Down
ENSSSCG00000014128	262.754	546.114	-1.1213	6.32707e-33	2.93517e-31	Down
ENSSSCG00000014324	465.363	225.534	0.979197	2.10688e-43	1.12776e-41	Down
ENSSSCG00000014560	963.431	1993.54	-1.11489	1.26033e-28	5.20999e-27	Down
ENSSSCG00000014725	11.3002	34.9447	-1.69453	8.83584e-06	6.37151e-05	Down
ENSSSCG00000014796	4.83984	17.4849	-1.91889	0.00128699	0.0048938	Down
ENSSSCG00000014804	27.2991	70.0369	-1.42507	1.10057e-07	1.18429e-06	Down
ENSSSCG00000014818	23.9088	50.995	-1.15863	2.81899e-05	0.000175145	Down
ENSSSCG00000015066	12.662	26.8497	-1.15021	0.000975446	0.00388241	Down
ENSSSCG00000015069	3.9678	70.1142	-4.20911	6.43229e-10	9.90991e-09	Down
ENSSSCG00000015070	18.256	54.304	-1.6385	2.14237e-05	0.000138894	Down
ENSSSCG00000015105	73.7854	248.282	-1.81638	7.31357e-48	4.30075e-46	Down
ENSSSCG00000015227	23.9688	49.0609	-1.09923	3.64408e-07	3.58835e-06	Down
ENSSSCG00000015305	1.18649	8.66605	-2.93448	0.000602429	0.00259571	Down
ENSSSCG00000015326	21.6319	46.9917	-1.18505	2.75287e-12	5.10831e-11	Down
ENSSSCG00000015340	2.34186	11.4032	-2.34952	1.91786e-05	0.000125311	Down
ENSSSCG00000015481	17.4772	39.4826	-1.24155	1.53678e-05	0.000103992	Down
ENSSSCG00000015613	6.26198	31.9668	-2.41769	8.42279e-06	6.14489e-05	Down
ENSSSCG00000015769	10.3306	34.0758	-1.78764	3.5547e-05	0.000215406	Down
ENSSSCG00000015861	0	2.46802	-4.54571	0.000640972	0.00273357	Down
ENSSSCG00000015862	32.2263	89.8488	-1.54507	9.6159e-12	1.70118e-10	Down
ENSSSCG00000016349	30.6191	91.7646	-1.64931	3.50269e-14	7.49964e-13	Down
ENSSSCG00000016435	12.5279	39.6841	-1.72923	1.27981e-06	1.11787e-05	Down
ENSSSCG00000016661	21.2987	10.2156	0.994177	0.000684996	0.00290786	Down
ENSSSCG00000016677	5.51682	16.4644	-1.64325	0.000220462	0.00110766	Down
ENSSSCG00000016734	11.1406	39.3727	-1.88718	5.04048e-08	5.73428e-07	Down
ENSSSCG00000016754	1.14844	6.7646	-2.62414	4.12939e-05	0.000247358	Down
ENSSSCG00000016772	1.29044	8.36111	-2.76165	9.65887e-06	6.91721e-05	Down
ENSSSCG00000016991	87.9136	43.9528	0.93432	3.02403e-08	3.6281e-07	Down
ENSSSCG00000017114	88.5639	209.23	-1.30611	1.01532e-11	1.78866e-10	Down
ENSSSCG00000017126	20.0704	48.9905	-1.35324	4.82383e-09	6.53904e-08	Down
ENSSSCG00000017131	16.6255	50.5669	-1.6706	3.16896e-07	3.15774e-06	Down
ENSSSCG00000017210	7.90001	32.5732	-2.10957	2.26509e-05	0.000145048	Down
ENSSSCG00000017264	4.70415	11.3606	-1.33784	0.0011039	0.00433171	Down
ENSSSCG00000017296	0.714513	5.05041	-2.88718	0.000818674	0.00337675	Down
ENSSSCG00000017340	0.986617	6.97372	-2.88718	0.000818674	0.00337675	Down
ENSSSCG00000017346	9.2582	19.1645	-1.11545	0.000610651	0.00262301	Down
ENSSSCG00000017355	12.3502	26.4123	-1.16249	0.000504375	0.00224504	Down
ENSSSCG00000017388	80.0774	169.804	-1.15021	1.84833e-07	1.91967e-06	Down
ENSSSCG00000017397	13.9009	30.2955	-1.18974	0.000579126	0.00250843	Down
ENSSSCG00000017515	7.7039	16.0568	-1.12534	0.000840763	0.0034314	Down
ENSSSCG00000017544	285.527	768.597	-1.49441	1.08225e-32	4.96546e-31	Down
ENSSSCG00000017549	53.8857	130.91	-1.34642	6.08277e-15	1.38779e-13	Down
ENSSSCG00000017668	1.34331	6.01345	-2.22822	7.40085e-05	0.000411997	Down
ENSSSCG00000017796	145.974	326.571	-1.22749	3.25257e-26	1.25741e-24	Down
ENSSSCG00000017803	0	10.353	-4.78672	0.000176326	0.000910002	Down
ENSSSCG00000017904	2319.8	6800.07	-1.61736	0	0	Down
ENSSSCG00000017906	18.0406	36.9614	-1.10058	1.00727e-09	1.51824e-08	Down
ENSSSCG00000017907	53.3339	138.557	-1.44317	4.44391e-15	1.02509e-13	Down
ENSSSCG00000017919	5.49845	25.9099	-2.30222	0.000699677	0.00296274	Down
ENSSSCG00000017929	41.5496	88.9215	-1.16351	0.000820903	0.00337675	Down
ENSSSCG00000017996	202.332	609.199	-1.656	2.38193e-45	1.32599e-43	Down
ENSSSCG00000018052	4.62956	22.1791	-2.32606	2.51804e-05	0.000158332	Down
ENSSSCG00000020657	41.9453	115.696	-1.52957	1.44235e-25	5.37683e-24	Down
ENSSSCG00000020809	22.5791	48.1919	-1.15961	7.32946e-05	0.000409113	Down
ENSSSCG00000020976	5.33979	20.633	-2.01591	8.69637e-06	6.28179e-05	Down
ENSSSCG00000021059	303.958	918.297	-1.6609	0	0	Down
ENSSSCG00000021084	8.06641	60.817	-2.98029	0.000442966	0.00201247	Down
ENSSSCG00000021236	12.1355	26.3931	-1.18674	0.000356572	0.00167521	Down
ENSSSCG00000021390	3.74512	25.5893	-2.83827	0.00111162	0.00434974	Down
ENSSSCG00000021461	32.9054	97.8053	-1.6374	6.22134e-08	7.00138e-07	Down
ENSSSCG00000021472	65.0876	135.462	-1.12325	4.17915e-07	4.05782e-06	Down
ENSSSCG00000021917	0	7.27614	-4.78672	0.000176326	0.000910002	Down
ENSSSCG00000021972	60.0581	154.98	-1.43346	7.53725e-09	9.86497e-08	Down
ENSSSCG00000021973	13.1414	35.3858	-1.49486	0.000426375	0.00195625	Down
ENSSSCG00000022025	5.42396	24.2809	-2.22822	0.0012131	0.00468971	Down
ENSSSCG00000022187	25.9074	88.5088	-1.83827	0.00045522	0.00206374	Down
ENSSSCG00000022209	36.249	110.317	-1.67145	9.08771e-08	9.90669e-07	Down
ENSSSCG00000022343	12.8217	38.5169	-1.65271	1.71963e-05	0.000114692	Down
ENSSSCG00000022404	18.6325	76.2765	-2.09923	3.88622e-17	1.06747e-15	Down
ENSSSCG00000022482	10.3274	24.1454	-1.29108	7.07256e-05	0.000395414	Down
ENSSSCG00000022820	22.0433	53.4945	-1.34486	0.000240355	0.00119467	Down
ENSSSCG00000022904	55.9271	112.005	-1.06775	0.00052396	0.00231494	Down
ENSSSCG00000022922	0	285.365	-5.13068	1.94491e-05	0.00012688	Down
ENSSSCG00000022998	3.63088	17.5372	-2.33784	0.000530182	0.00232765	Down
ENSSSCG00000023044	6.13162	19.6063	-1.74279	1.58924e-05	0.000107194	Down
ENSSSCG00000023091	26.0451	54.2502	-1.12443	1.52479e-14	3.35065e-13	Down
ENSSSCG00000023108	15.3565	35.6992	-1.28285	2.29671e-05	0.000146848	Down
ENSSSCG00000023110	51.7418	116.545	-1.2373	1.78848e-07	1.8668e-06	Down
ENSSSCG00000023245	14.2934	29.6355	-1.11779	0.000375848	0.00175333	Down
ENSSSCG00000023257	11.3389	25.1689	-1.21618	8.49418e-06	6.16775e-05	Down
ENSSSCG00000023263	51.0639	105.774	-1.11642	7.06258e-06	5.23755e-05	Down
ENSSSCG00000023287	0	28.8247	-5.08628	2.65454e-05	0.000166164	Down
ENSSSCG00000023304	4.39254	10.2343	-1.2861	3.27115e-06	2.62142e-05	Down
ENSSSCG00000023379	0	8.85833	-4.4786	0.000888518	0.00358772	Down
ENSSSCG00000023496	1077.92	2693.94	-1.38728	1.08119e-105	1.07479e-103	Down
ENSSSCG00000023636	11.293	25.5841	-1.24563	0.000146792	0.000766103	Down
ENSSSCG00000023680	3.44801	9.83892	-1.57855	1.78139e-05	0.00011752	Down
ENSSSCG00000023719	4.0063	16.3614	-2.09577	0.000277054	0.00133728	Down
ENSSSCG00000023998	29.1129	59.7991	-1.10428	1.62363e-08	2.01155e-07	Down
ENSSSCG00000024018	24.8997	113.578	-2.2553	2.62299e-31	1.15278e-29	Down
ENSSSCG00000024103	17.406	39.892	-1.26232	7.64004e-10	1.17273e-08	Down
ENSSSCG00000024126	7.09906	20.4059	-1.5891	0.00125426	0.00481085	Down
ENSSSCG00000024184	2.29628	13.2552	-2.595	5.50727e-05	0.000314983	Down
ENSSSCG00000024230	11.293	46.563	-2.10957	2.07148e-09	2.94175e-08	Down
ENSSSCG00000024254	0.501395	3.54402	-2.88718	0.000818674	0.00337675	Down
ENSSSCG00000024263	762.275	1976.6	-1.44045	4.95965e-65	3.69774e-63	Down
ENSSSCG00000024363	9.86175	22.4221	-1.25082	2.20252e-06	1.8355e-05	Down
ENSSSCG00000024391	9.68915	26.1261	-1.49686	1.5166e-08	1.89582e-07	Down
ENSSSCG00000024398	13.792	49.2849	-1.90312	6.75893e-06	5.04823e-05	Down
ENSSSCG00000024936	0	10.2786	-4.60984	0.000463138	0.0020837	Down
ENSSSCG00000024990	6.78971	19.4634	-1.58515	0.000427314	0.00195626	Down
ENSSSCG00000024995	0	24.9653	-4.60984	0.000463138	0.0020837	Down
ENSSSCG00000025078	23.303	57.0394	-1.35726	6.18145e-07	5.79968e-06	Down
ENSSSCG00000025305	12.6197	28.8412	-1.25827	1.84374e-06	1.55513e-05	Down
ENSSSCG00000025343	5.64106	18.4412	-1.7747	2.26932e-06	1.88365e-05	Down
ENSSSCG00000025447	118.048	58.1551	0.955582	6.62076e-11	1.11914e-09	Down
ENSSSCG00000025534	6.90323	16.8747	-1.35533	0.000908249	0.00365679	Down
ENSSSCG00000025610	3.54515	9.88409	-1.54507	0.000659328	0.00280612	Down
ENSSSCG00000025673	22.3377	47.8057	-1.16351	0.000820903	0.00337675	Down
ENSSSCG00000025791	1.8451	11.5202	-2.70821	1.73136e-05	0.000115107	Down
ENSSSCG00000025814	19.6619	50.958	-1.43972	0.0003349	0.00158479	Down
ENSSSCG00000026167	43.179	169.557	-2.03918	0.000465213	0.00209079	Down
ENSSSCG00000026229	11.7551	97.8604	-3.12325	6.01258e-11	1.02047e-09	Down
ENSSSCG00000026701	20.0421	75.5542	-1.98029	4.04903e-08	4.72217e-07	Down
ENSSSCG00000026877	9.70101	31.4278	-1.76165	0.000932908	0.00373446	Down
ENSSSCG00000026953	25.4476	12.6339	0.944424	0.00109789	0.00431219	Down
ENSSSCG00000026990	216.757	467.034	-1.17326	5.13432e-16	1.31513e-14	Down
ENSSSCG00000027121	6.52289	23.0529	-1.88718	4.86406e-05	0.00028684	Down
ENSSSCG00000027127	27.3907	59.5054	-1.18515	3.56563e-16	9.18956e-15	Down
ENSSSCG00000027205	21.5367	51.4475	-1.32212	9.28196e-12	1.64909e-10	Down
ENSSSCG00000027307	18.5364	50.2249	-1.50385	2.19432e-05	0.000141602	Down
ENSSSCG00000027357	56.3445	130.541	-1.27797	0.00016422	0.000853857	Down
ENSSSCG00000027428	140.561	478.138	-1.83204	1.19577e-33	5.73853e-32	Down
ENSSSCG00000027441	17.6406	57.4955	-1.77037	4.4854e-05	0.000267533	Down
ENSSSCG00000027580	0	5.9697	-4.60984	0.000463138	0.0020837	Down
ENSSSCG00000027629	4.66553	22.4247	-2.33079	4.89617e-08	5.60063e-07	Down
ENSSSCG00000027812	22.2021	10.6863	0.989124	8.89122e-08	9.74338e-07	Down
ENSSSCG00000028040	5.57501	34.8086	-2.70821	1.73136e-05	0.000115107	Down
ENSSSCG00000028045	15.3125	43.9699	-1.58762	8.19873e-09	1.06307e-07	Down
ENSSSCG00000028235	0	11.0393	-5.04048	3.62761e-05	0.000219187	Down
ENSSSCG00000028553	23.4416	50.6824	-1.17823	5.21341e-05	0.000303159	Down
ENSSSCG00000028571	5.86452	25.5623	-2.18974	8.01355e-06	5.85952e-05	Down
ENSSSCG00000028580	65.6404	136.696	-1.12412	2.61426e-07	2.6557e-06	Down
ENSSSCG00000028720	44.8556	93.2996	-1.1224	1.52617e-13	3.12353e-12	Down
ENSSSCG00000028846	0	11.6197	-4.60984	0.000463138	0.0020837	Down
ENSSSCG00000028856	7.31604	18.6959	-1.4194	7.16469e-06	5.30385e-05	Down
ENSSSCG00000028865	6.98534	23.0415	-1.78764	0.000735673	0.0030932	Down
ENSSSCG00000028934	16.8857	33.8854	-1.07067	2.79554e-06	2.26198e-05	Down
ENSSSCG00000029034	209.409	419.538	-1.06829	1.54392e-27	6.19817e-26	Down
ENSSSCG00000029050	0	16.0965	-4.99317	4.96366e-05	0.000290253	Down
ENSSSCG00000029161	43.5267	123.824	-1.57413	1.31628e-13	2.70722e-12	Down
ENSSSCG00000029179	208.05	452.481	-1.18674	1.4154e-15	3.49677e-14	Down
ENSSSCG00000029241	9.41081	26.977	-1.58515	0.000427314	0.00195626	Down
ENSSSCG00000029502	10.8213	25.2836	-1.29014	0.000136511	0.000723292	Down
ENSSSCG00000029679	53.2773	126.723	-1.31589	2.27641e-07	2.31814e-06	Down
ENSSSCG00000029949	0.829427	5.66723	-2.83827	0.00111162	0.00434974	Down
ENSSSCG00000030000	0.871785	9.85929	-3.56525	3.03883e-06	2.44463e-05	Down
ENSSSCG00000030134	2346.13	6140.01	-1.45377	0	0	Down
ENSSSCG00000030302	533.21	1433.74	-1.49282	4.98461e-70	3.92671e-68	Down
ENSSSCG00000030325	0	4.12327	-4.67124	0.000335166	0.00158479	Down
ENSSSCG00000030390	2.37234	8.94319	-1.98029	0.000104001	0.000564655	Down
ENSSSCG00000030431	13.6308	39.966	-1.61772	9.34723e-06	6.71613e-05	Down
