# Supplementary material for: Comparison of differentially expressed genes in longissimus dorsi muscle of Diannan small ears, Wujin and landrace pigs using RNA-seq
Source: Front Vet Sci. 2024 Jan 5;10:1296208. doi: 10.3389/fvets.2023.1296208 (PMC10796741; doi:10.3389/fvets.2023.1296208)
Supplement: Supplementary file 8 [file Table_5.XLSX]

## Sheet: D54_D67_D74vsW17_W20_W21.GO_enr
Table S5. GO functional annotation of differentially expressed genes between DSE and WJ
GO_accession	Description	Term_type	Over_represented_pValue	Corrected_pValue	DEG_item	DEG_list	Bg_item	Bg_list	Gene_names
GO:0005737	cytoplasm	cellular_component	2.01723e-09	1.02976e-05	170	361	5099	16315	NUDC,C19orf24,PRKRA,POLR2H,UTP11L,WDR26,VCL,VCL,POMC,ZNF259,DES,MTR,UBC,PSMA2,HADHA,MLXIP,ENSSSCG00000025941,CENPV,RNF144B,UBD,UBD,PANX2,CNKSR3,TOB1,STAT5B,PODXL,ALDH18A1,TUBB2A,SH3KBP1,CDC42EP2,ZFPM2,CAPNS1,RASGRP3,PSMB4,RNF19A,RNF167,PINX1,BECN1,HSF2,FAAH,SGTA,EIF4G2,KARS,ENSSSCG00000016216,STK24,CCT2,S100A6,ATG4D,FOXO1A,FOXO1A,ABL1,TUBA1B,HSPCB,ANKRD1,AAAS,DNAJB4,DAG1,RPS29,NUP153,KLF6,RCAN1,P…
GO:0005515	protein binding	molecular_function	2.16004e-09	1.02976e-05	186	361	5731	16315	PFKFB1,OLFM1,NUDC,PRKRA,TRNAU1AP,EIF4EBP1,ECH1,ANGPTL4,CCDC89,C19ORF50,UTP11L,TRAPPC5,VCL,CNOT1,ZNF259,NRIP1,CHD8,DES,TIMM22,ZMYM2,AP5B1,UBC,BAT4,PACS1,ARRDC3,HADHA,MLXIP,CDK9,NPLOC4,PHYH,RNF144B,UBD,TOB1,NR4A2,STAT5B,DNAJB5,MT-ND3,PNRC1,DYNLRB1,TUBB2A,SF3B2,GIPC2,SH3KBP1,SLC7A8,PCBD2,CDC42EP2,ZFPM2,CAPNS1,OGN,ZP2,CISH,PLEKHB1,RNF19A,TNS1,NFIL3,RNF167,PINX1,BECN1,OBFC2B,TNFRSF12A,MYO18A,THBS1,SER…
GO:0005622	intracellular	cellular_component	1.29759e-08	4.63955e-05	244	361	8426	16315	PRKRA,MKRN2,ENSSSCG00000026113,DES,GSTK1,MTR,C12ORF5,KLF2,KLF2,KLF2,KLF2,KLF2,NPLOC4,NPC2,MLLT11,KLF9,ZNF628,ENSSSCG00000027441,ZNF385A,ASB5,ZFPM2,RASGRP3,TBC1D1,LGALS1,ITPK1,NEDD4L,NEDD4L,EWSR1,VPS41,RPL37,HSPCB,RPS29,NUP153,RPL11,IMP3,KLF6,ZNF385D,RPS23,CSE1L,PITPNM2,ENSSSCG00000027168,ARID5B,ENSSSCG00000020940,MRPL12,TBC1D20,DRAP1,NOL3,ZHX2,DGKZ
GO:0043231	intracellular membrane-bounded organelle	cellular_component	2.08558e-05	0.0308986	165	361	5547	16315	GSTK1,CDK9,PODXL,PECI,PINX1,CISD3,CISD3,CLU,PITPNM2,APP,AUP1
GO:0044444	cytoplasmic part	cellular_component	2.32793e-05	0.0308986	114	361	3514	16315	ANKRD1
GO:0035259	glucocorticoid receptor binding	molecular_function	4.88706e-05	0.0582456	3	361	4	16315	NRIP1,STAT5B,FKBP4
GO:0031966	mitochondrial membrane	cellular_component	5.43156e-05	0.0596114	18	361	277	16315	RNF144B,MT-ND3,SLC25A32,CLU
GO:0005739	mitochondrion	cellular_component	5.83527e-05	0.0596114	45	361	1075	16315	ECH1,COX5B,GSTK1,TIMM22,SLC25A26,CPT2,HADHA,CCDC90B,NDUFB8,PHYH,ALDH18A1,MT-ND3,PECI,NDUFA11,PCBD2,DHRS4,PINX1,PDK4,HSPA2,KARS,MT-CO1,C22ORF25,HSPCB,SLC25A32,SECISBP2,C9ORF46,CLU,AP2M1,C19ORF70,NDUFA8,COQ9,MUL1,NDUFA10,MRPL12,ALDH4A1,NOL3,ACSL4,UQCRC1,DUSP26,LDHA,SLC25A28,NDUFV1
GO:0005740	mitochondrial envelope	cellular_component	8.85577e-05	0.0799223	18	361	289	16315	COX5B
GO:0007565	female pregnancy	biological_process	0.000250036	0.188211	6	361	40	16315	STAT5B
GO:0043065	positive regulation of apoptosis	biological_process	0.000372021	0.261925	16	361	262	16315	UBD,UBD,MLLT11,DCUN1D3,ABL1,ANKRD1,CLU,CLU,TNFSF10,FADD,SAV1
GO:0048870	cell motility	biological_process	0.000439533	0.261925	26	361	554	16315	GAS8
GO:0031012	extracellular matrix	cellular_component	0.00047115	0.269536	17	361	285	16315	LUM,OLFML2A,SLPI,OGN,ZP2,THBS1,THBS1,LGALS1,COL3A1,MFGE8,CLU,CLU,ADAMTS8
GO:0051861	glycolipid binding	molecular_function	0.000498074	0.269747	3	361	8	16315	HSPA2,GLTP
GO:0016477	cell migration	biological_process	0.000665267	0.31194	24	361	509	16315	PODXL,SH3KBP1,MYO18A,THBS1,THBS1,NDEL1,KCTD13,LAMB1
GO:0005747	mitochondrial respiratory chain complex I	cellular_component	0.000676138	0.31194	5	361	33	16315	NDUFB8,MT-ND3,NDUFA8,NDUFA10,NDUFV1
GO:0005743	mitochondrial inner membrane	cellular_component	0.000779885	0.328056	13	361	209	16315	COX5B,GSTK1,SLC25A26,HADHA,PDK4,MT-CO1,NDUFA8,UQCRC1,NDUFV1
GO:0000977	RNA polymerase II regulatory region sequence-specific DNA binding	molecular_function	0.000875643	0.347873	6	361	50	16315	NFIL3,NFIL3,ETS2
GO:0070469	respiratory chain	cellular_component	0.00101164	0.353601	6	361	58	16315	MT-ND3,MT-CO1
GO:0043234	protein complex	cellular_component	0.00101368	0.353601	68	361	2029	16315	VCL,VCL,CHD8,TUBB2A,BECN1,CCM2,ENSSSCG00000016216,TUBA1B,TUBB4B
GO:0044237	cellular metabolic process	biological_process	0.00111452	0.365204	172	361	6283	16315	MTR
GO:0042981	regulation of apoptosis	biological_process	0.00112355	0.365204	28	361	652	16315	FADD,TRIM24,NOL3
GO:0016011	dystroglycan complex	cellular_component	0.00126389	0.380965	3	361	10	16315	DAG1
GO:0005634	nucleus	cellular_component	0.00128708	0.380965	103	361	3432	16315	TRNAU1AP,POLR2H,UTP11L,WDR26,ZNF259,ENSSSCG00000026113,NRIP1,CHD8,SLC25A26,CPT2,UBC,PSMA2,KLF2,KLF2,KLF2,KLF2,KLF2,MLXIP,CDK9,CENPV,UBD,UBD,HIST1H2BD,NR4A2,STAT5B,CSRNP1,KLF9,DNAJB5,ADPRHL2,ZNF628,TUBB2A,MAFF,SF3B2,SH3KBP1,PCBD2,ZFPM2,TMEM115,PSMB4,NFIL3,NFIL3,PINX1,OBFC2B,SUPT4H1,ATF3,CREB,CREB,CREB,CREB,CREB,CREB,CREB,HSF2,ENSSSCG00000010993,DUSP10,L3MBTL3,BHLHE41,EWSR1,STK24,CCT2,MYF5,S100A6,F…
GO:0043292	contractile fiber	cellular_component	0.00140405	0.389745	8	361	93	16315	DES
GO:0005916	fascia adherens	cellular_component	0.00159061	0.413617	3	361	10	16315	VCL,VCL,DES,CMYA1
GO:0042383	sarcolemma	cellular_component	0.00197523	0.463111	5	361	37	16315	DES,DAG1,FLNC,SGCA
GO:0016010	dystrophin-associated glycoprotein complex	cellular_component	0.00210814	0.478581	3	361	12	16315	DAG1
GO:0005198	structural molecule activity	molecular_function	0.00265772	0.57592	19	361	467	16315	VCL,VCL,DES,TUBB2A,ENSSSCG00000016216,TUBA1B,TUBB4B,MOSPD1,MOSPD1
GO:0033130	acetylcholine receptor binding	molecular_function	0.00273207	0.582541	2	361	4	16315	APP,RAPSN
GO:0017049	GTP-Rho binding	molecular_function	0.00276974	0.582541	2	361	4	16315	CDC42EP2,KCTD13
GO:0010757	negative regulation of plasminogen activation	biological_process	0.00303619	0.608068	2	361	4	16315	THBS1,THBS1,SERPINE1
GO:0005200	structural constituent of cytoskeleton	molecular_function	0.00306547	0.608068	3	361	14	16315	TUBB2A,TUBA1B,TUBB4B
GO:0001727	lipid kinase activity	molecular_function	0.00309272	0.608068	2	361	4	16315	PIK3C2B,DGKZ
GO:0032040	small-subunit processome	cellular_component	0.00333822	0.632291	2	361	4	16315	UTP11L,ENSSSCG00000012654
GO:0008152	metabolic process	biological_process	0.00336871	0.632291	202	361	7716	16315	PFKFB1,PFKFB1,ECH1,ENSSSCG00000005776,HADHA,CENPV,ALDH18A1,ACSM5,PECI,ACADVL,DHRS4,LIPE,ATGL,UGP2,METTL12,AUP1,ALDH4A1,ACSL4,ENSSSCG00000016041
GO:0051918	negative regulation of fibrinolysis	biological_process	0.00344838	0.632291	2	361	4	16315	THBS1,THBS1,SERPINE1
GO:0010761	fibroblast migration	biological_process	0.00351888	0.637051	3	361	13	16315	TNS1,ARID5B
GO:0030016	myofibril	cellular_component	0.00364007	0.644554	7	361	86	16315	ABRA,ANKRD1
GO:0060136	embryonic process involved in female pregnancy	biological_process	0.00409815	0.690684	2	361	5	16315	JUNB,ACSL4
GO:0006915	apoptosis	biological_process	0.00410489	0.690684	29	361	748	16315	NR4A1
GO:0008219	cell death	biological_process	0.00438863	0.705858	30	361	785	16315	TNFRSF12A,CLU
GO:0045893	positive regulation of transcription, DNA-dependent	biological_process	0.00439249	0.705858	27	361	691	16315	CHD8,KLF2,KLF2,KLF2,KLF2,KLF2,NR4A2,MLLT11,PCBD2,ZFPM2,ABRA,SERTAD1,CREB,CREB,CREB,CREB,CREB,CREB,COL3A1,MYF5,FOXO1A,FOXO1A,ETS2,MRPL12,NR4A1,EGF,TRIM24
GO:0034097	response to cytokine stimulus	biological_process	0.00454388	0.715452	12	361	222	16315	COL3A1
GO:0016265	death	biological_process	0.00455224	0.715452	30	361	787	16315	NR4A2
GO:0006561	proline biosynthetic process	biological_process	0.00465158	0.723119	2	361	5	16315	ALDH18A1,ALDH4A1
GO:0019433	triglyceride catabolic process	biological_process	0.0049554	0.744575	2	361	6	16315	LIPE
GO:2000060	positive regulation of protein ubiquitination involved in ubiquitin-dependent protein catabolic process	biological_process	0.00540951	0.767645	2	361	5	16315	CLU,CLU,EGF
GO:0010225	response to UV-C	biological_process	0.00548622	0.769255	2	361	5	16315	DCUN1D3,POLH
GO:0007162	negative regulation of cell adhesion	biological_process	0.00555509	0.769906	5	361	49	16315	LAMB1
GO:0031674	I band	cellular_component	0.00563389	0.769906	5	361	50	16315	ANKRD1
GO:0006364	rRNA processing	biological_process	0.00681822	0.878506	5	361	55	16315	UTP11L,ENSSSCG00000012654,RPL11,IMP3,PES1
GO:0006301	postreplication repair	biological_process	0.00716854	0.915397	2	361	6	16315	POLH
GO:0010628	positive regulation of gene expression	biological_process	0.00726128	0.919034	28	361	752	16315	NFIL3,NFIL3,TRIM24
GO:0007566	embryo implantation	biological_process	0.00767697	0.954748	3	361	18	16315	KLF9,LAMB1,FKBP4
GO:0010944	negative regulation of transcription by competitive promoter binding	biological_process	0.00782185	0.96438	2	361	6	16315	CREB,CREB,CREB,CREB,CREB,CREB,BHLHE41
GO:0014704	intercalated disc	cellular_component	0.00801643	0.970442	3	361	17	16315	CMYA1
GO:0005581	collagen	cellular_component	0.00806992	0.970442	5	361	54	16315	C1QA,COL3A1,ENSSSCG00000009285,COL1A2
GO:0060338	regulation of type I interferon-mediated signaling pathway	biological_process	0.00814243	0.970442	2	361	6	16315	HSPCB
GO:0045087	innate immune response	biological_process	0.00883035	1	8	361	125	16315	MIF,PBD-2
GO:0006457	protein folding	biological_process	0.00934778	1	9	361	155	16315	FKBP15,DNAJB5,CCT2,HSPCB,DNAJB4,DNAJB1,DNAJA4,FKBP4
GO:0051787	misfolded protein binding	molecular_function	0.00952777	1	2	361	7	16315	DNAJC10,CLU,CLU
GO:0005811	lipid particle	cellular_component	0.00958343	1	3	361	19	16315	LIPE,ENSSSCG00000004104,ACSL4
GO:0008137	NADH dehydrogenase (ubiquinone) activity	molecular_function	0.00979589	1	3	361	22	16315	NDUFB8,MT-ND3,NDUFV1
GO:0000988	protein binding transcription factor activity	molecular_function	0.0100233	1	13	361	270	16315	PER1
GO:0006917	induction of apoptosis	biological_process	0.0102934	1	7	361	105	16315	PRKRA,UTP11L,TNFRSF12A,THBS1,THBS1,STK24,MUL1,NR4A1
GO:0071157	negative regulation of cell cycle arrest	biological_process	0.010442	1	2	361	7	16315	CDK9,MIF
GO:0006596	polyamine biosynthetic process	biological_process	0.0105454	1	2	361	7	16315	AMD1,ODC1
GO:0051233	spindle midzone	cellular_component	0.0112099	1	2	361	7	16315	CENPV,APP,APP
GO:0006119	oxidative phosphorylation	biological_process	0.0117669	1	3	361	23	16315	MT-CO1
GO:0005583	fibrillar collagen	cellular_component	0.0119607	1	2	361	7	16315	LUM
GO:0009062	fatty acid catabolic process	biological_process	0.0120577	1	4	361	37	16315	PECI,FAAH
GO:0006631	fatty acid metabolic process	biological_process	0.0123058	1	9	361	157	16315	HADHA,STAT5B
GO:0016874	ligase activity	molecular_function	0.0123388	1	15	361	327	16315	RNF19A,NEDD4L,UBE2L6,ACSL4,GSS
GO:0003954	NADH dehydrogenase activity	molecular_function	0.0124442	1	3	361	24	16315	NDUFB8
GO:0042802	identical protein binding	molecular_function	0.0128704	1	20	361	497	16315	DYNLRB1,ATF3,COL3A1,KCTD13,APP,MUL1,PCNA,MOCS2,FADD,NOL3
GO:0030018	Z disc	cellular_component	0.0129124	1	4	361	40	16315	MYL12B,DES,GLRX3,NP_001038058.1
GO:0050178	phenylpyruvate tautomerase activity	molecular_function	0.0130674	1	1	361	1	16315	MIF
GO:0015035	protein disulfide oxidoreductase activity	molecular_function	0.0131031	1	3	361	22	16315	GSTK1,DNAJC10,GLRX3
GO:0051082	unfolded protein binding	molecular_function	0.0132479	1	6	361	85	16315	DNAJB5,CCT2,HSPCB,DNAJB4,DNAJB1,DNAJA4
GO:0001967	suckling behavior	biological_process	0.0134379	1	2	361	8	16315	CNTFR,APP,APP
GO:0007517	muscle organ development	biological_process	0.0134469	1	10	361	194	16315	KY,MYF5
GO:0005615	extracellular space	cellular_component	0.0136408	1	17	361	427	16315	OLFM1,ANGPTL4,UTP11L,POMC,LUM,OGN,THBS1,THBS1,LGALS1,COL3A1,MFGE8,DAG1,CLU,CLU,MIF,TNFSF10,TNFSF10,EGF,LAMB1
GO:0008652	cellular amino acid biosynthetic process	biological_process	0.013929	1	4	361	39	16315	ALDH18A1
GO:0000042	protein targeting to Golgi	biological_process	0.0141427	1	2	361	8	16315	PACS1,GOLGA4,GOLGA4
GO:0071310	cellular response to organic substance	biological_process	0.0142677	1	21	361	546	16315	NR4A1
GO:0050840	extracellular matrix binding	molecular_function	0.0148282	1	3	361	22	16315	OLFML2A,THBS1,THBS1
GO:0044421	extracellular region part	cellular_component	0.0157298	1	22	361	596	16315	C19orf24
GO:0047134	protein-disulfide reductase activity	molecular_function	0.0164828	1	1	361	1	16315	TXNDC17
GO:0003714	transcription corepressor activity	molecular_function	0.0165341	1	6	361	88	16315	NRIP1,TOB1,ZFPM2,ANKRD1,DRAP1,ZHX2
GO:0016012	sarcoglycan complex	cellular_component	0.0165667	1	2	361	9	16315	SGCG,SGCA
GO:0031662	positive regulation of cyclin-dependent protein kinase activity involved in G2/M	biological_process	0.0167238	1	1	361	1	16315	HSPA2
GO:0070194	synaptonemal complex disassembly	biological_process	0.0167238	1	1	361	1	16315	HSPA2
GO:0042787	protein ubiquitination involved in ubiquitin-dependent protein catabolic process	biological_process	0.0167559	1	3	361	23	16315	RNF144B
GO:0035417	negative regulation of mitotic prometaphase	biological_process	0.0168003	1	1	361	1	16315	UBD,UBD
GO:0007402	ganglion mother cell fate determination	biological_process	0.0173996	1	1	361	1	16315	NTF4
GO:0008052	sensory organ boundary specification	biological_process	0.0173996	1	1	361	1	16315	NTF4
GO:0035087	siRNA loading onto RISC involved in RNA interference	biological_process	0.0177431	1	1	361	1	16315	CLP1
GO:0051736	ATP-dependent polyribonucleotide 5'-hydroxyl-kinase activity	molecular_function	0.0177431	1	1	361	1	16315	CLP1
GO:0048644	muscle organ morphogenesis	biological_process	0.017826	1	4	361	46	16315	ARID5B
GO:0005626	insoluble fraction	cellular_component	0.0181552	1	2	361	9	16315	DES,DAG1
GO:0016936	galactoside binding	molecular_function	0.0185353	1	1	361	1	16315	LGALS1
GO:0007018	microtubule-based movement	biological_process	0.0186146	1	7	361	111	16315	TUBB2A,ENSSSCG00000016216,TUBA1B,TUBB4B
GO:0030194	positive regulation of blood coagulation	biological_process	0.0187097	1	2	361	9	16315	THBS1,THBS1,SERPINE1
GO:0006366	transcription from RNA polymerase II promoter	biological_process	0.0187655	1	29	361	853	16315	POLR2H,KLF2,KLF2,KLF2,KLF2,KLF2,BHLHE41
GO:0001190	RNA polymerase II transcription factor binding transcription factor activity involved in positive regulation of transcription	molecular_function	0.0192218	1	3	361	27	16315	KLF2,KLF2,KLF2,KLF2,KLF2,CREB,CREB,CREB,CREB,CREB,CREB
GO:0060213	positive regulation of nuclear-transcribed mRNA poly(A) tail shortening	biological_process	0.0194407	1	1	361	1	16315	BTG2
GO:0003881	CDP-diacylglycerol-inositol 3-phosphatidyltransferase activity	molecular_function	0.0209024	1	1	361	1	16315	CDIPT
GO:0001010	sequence-specific DNA binding transcription factor recruiting transcription factor activity	molecular_function	0.0209606	1	1	361	1	16315	KLF2,KLF2,KLF2,KLF2,KLF2
GO:2000342	negative regulation of chemokine (C-X-C motif) ligand 2 production	biological_process	0.0209606	1	1	361	1	16315	KLF2,KLF2,KLF2,KLF2,KLF2
GO:0032922	circadian regulation of gene expression	biological_process	0.0210942	1	2	361	10	16315	BHLHE41,PER1
GO:0015036	disulfide oxidoreductase activity	molecular_function	0.0214846	1	3	361	26	16315	DNAJC10
GO:0045931	positive regulation of mitotic cell cycle	biological_process	0.021495	1	3	361	26	16315	EIF4EBP1,STAT5B,APP,APP
GO:0000701	purine-specific mismatch base pair DNA N-glycosylase activity	molecular_function	0.0221422	1	1	361	1	16315	PCNA
GO:0032077	positive regulation of deoxyribonuclease activity	biological_process	0.0221422	1	1	361	1	16315	PCNA
GO:0043626	PCNA complex	cellular_component	0.0221422	1	1	361	1	16315	PCNA
GO:0070557	PCNA-p21 complex	cellular_component	0.0221422	1	1	361	1	16315	PCNA
GO:0006886	intracellular protein transport	biological_process	0.0223096	1	16	361	390	16315	ZP2,VPS41,CSE1L,AP2M1,ENSSSCG00000023263,SRPR,AP3S2
GO:0004586	ornithine decarboxylase activity	molecular_function	0.0224458	1	1	361	1	16315	ODC1
GO:0005523	tropomyosin binding	molecular_function	0.0225742	1	2	361	10	16315	LMOD2,S100A6
GO:0035491	positive regulation of leukotriene production involved in inflammatory response	biological_process	0.0227622	1	1	361	1	16315	SERPINE1
GO:0061044	negative regulation of vascular wound healing	biological_process	0.0227622	1	1	361	1	16315	SERPINE1
GO:2000098	negative regulation of smooth muscle cell-matrix adhesion	biological_process	0.0227622	1	1	361	1	16315	SERPINE1
GO:0005201	extracellular matrix structural constituent	molecular_function	0.0239424	1	3	361	26	16315	COL3A1,LAMB1,COL1A2
GO:0006463	steroid hormone receptor complex assembly	biological_process	0.0243923	1	1	361	1	16315	FKBP4
GO:0035994	response to muscle stretch	biological_process	0.0244432	1	1	361	1	16315	ANKRD1
GO:0033059	cellular pigmentation	biological_process	0.024536	1	2	361	11	16315	POMC
GO:0015934	large ribosomal subunit	cellular_component	0.0246232	1	4	361	60	16315	ENSSSCG00000024398
GO:0006931	substrate-dependent cell migration, cell attachment to substrate	biological_process	0.0249089	1	1	361	1	16315	TNFRSF12A
GO:0032463	negative regulation of protein homooligomerization	biological_process	0.0249098	1	1	361	1	16315	CLU,CLU
GO:0042583	chromaffin granule	cellular_component	0.0249098	1	1	361	1	16315	CLU
GO:0005055	laminin receptor activity	molecular_function	0.024953	1	1	361	1	16315	BCAM
GO:0030387	fructosamine-3-kinase activity	molecular_function	0.0249618	1	1	361	1	16315	FN3K
GO:0030389	fructosamine metabolic process	biological_process	0.0249618	1	1	361	1	16315	FN3K
GO:0004824	lysine-tRNA ligase activity	molecular_function	0.0249629	1	1	361	1	16315	KARS
GO:0006430	lysyl-tRNA aminoacylation	biological_process	0.0249629	1	1	361	1	16315	KARS
GO:0071568	UFM1 conjugating enzyme activity	molecular_function	0.0249631	1	1	361	1	16315	UFC1
GO:0005290	L-histidine transmembrane transporter activity	molecular_function	0.0249632	1	1	361	1	16315	SLC38A5
GO:0015817	histidine transport	biological_process	0.0249632	1	1	361	1	16315	SLC38A5
GO:0009279	cell outer membrane	cellular_component	0.0249635	1	1	361	1	16315	DAG1
GO:0021682	nerve maturation	biological_process	0.0249635	1	1	361	1	16315	DAG1
GO:0002581	negative regulation of antigen processing and presentation of peptide or polysaccharide antigen via MHC class II	biological_process	0.024964	1	1	361	1	16315	THBS1,THBS1
GO:0002605	negative regulation of dendritic cell antigen processing and presentation	biological_process	0.024964	1	1	361	1	16315	THBS1,THBS1
GO:0010751	negative regulation of nitric oxide mediated signal transduction	biological_process	0.024964	1	1	361	1	16315	THBS1,THBS1
GO:0010754	negative regulation of cGMP-mediated signaling	biological_process	0.024964	1	1	361	1	16315	THBS1,THBS1
GO:0003842	1-pyrroline-5-carboxylate dehydrogenase activity	molecular_function	0.0249645	1	1	361	1	16315	ALDH4A1
GO:0017064	fatty acid amide hydrolase activity	molecular_function	0.0249647	1	1	361	1	16315	FAAH
GO:0021678	third ventricle development	biological_process	0.0249654	1	1	361	1	16315	DPCD
GO:0030366	Mo-molybdopterin synthase activity	molecular_function	0.0249656	1	1	361	1	16315	MOCS2
GO:0004014	adenosylmethionine decarboxylase activity	molecular_function	0.024967	1	1	361	1	16315	AMD1
GO:0008295	spermidine biosynthetic process	biological_process	0.024967	1	1	361	1	16315	AMD1
GO:0015888	thiamine transport	biological_process	0.0249679	1	1	361	1	16315	NP_001136139.1
GO:0071934	thiamine transmembrane transport	biological_process	0.0249679	1	1	361	1	16315	NP_001136139.1
GO:0046544	development of secondary male sexual characteristics	biological_process	0.0249683	1	1	361	1	16315	STAT5B
GO:0004363	glutathione synthase activity	molecular_function	0.0249691	1	1	361	1	16315	GSS
GO:0003360	brainstem development	biological_process	0.0249693	1	1	361	1	16315	CNTFR
GO:0060837	blood vessel endothelial cell differentiation	biological_process	0.0249695	1	1	361	1	16315	CCM2
GO:0047312	L-phenylalanine:pyruvate aminotransferase activity	molecular_function	0.0249697	1	1	361	1	16315	CCBL1
GO:0047945	L-glutamine:pyruvate aminotransferase activity	molecular_function	0.0249697	1	1	361	1	16315	CCBL1
GO:0060266	negative regulation of respiratory burst involved in inflammatory response	biological_process	0.0249698	1	1	361	1	16315	DUSP10
GO:0005584	collagen type I	cellular_component	0.0249698	1	1	361	1	16315	COL3A1
GO:0005586	collagen type III	cellular_component	0.0249698	1	1	361	1	16315	COL3A1
GO:0004349	glutamate 5-kinase activity	molecular_function	0.0249699	1	1	361	1	16315	ALDH18A1
GO:0004350	glutamate-5-semialdehyde dehydrogenase activity	molecular_function	0.0249699	1	1	361	1	16315	ALDH18A1
GO:0032534	regulation of microvillus assembly	biological_process	0.0249701	1	1	361	1	16315	PODXL
GO:0005785	signal recognition particle receptor complex	cellular_component	0.0249723	1	1	361	1	16315	SRPR
GO:0043111	replication fork arrest	biological_process	0.0249749	1	1	361	1	16315	CDK9
GO:0047676	arachidonate-CoA ligase activity	molecular_function	0.0249861	1	1	361	1	16315	ACSL4
GO:0043540	6-phosphofructo-2-kinase/fructose-2,6-biphosphatase 1 complex	cellular_component	0.0249921	1	1	361	1	16315	PFKFB1,PFKFB1
GO:0047325	inositol tetrakisphosphate 1-kinase activity	molecular_function	0.0249939	1	1	361	1	16315	ITPK1
GO:0052725	inositol-1,3,4-trisphosphate 6-kinase activity	molecular_function	0.0249939	1	1	361	1	16315	ITPK1
GO:0052726	inositol-1,3,4-trisphosphate 5-kinase activity	molecular_function	0.0249939	1	1	361	1	16315	ITPK1
GO:0004300	enoyl-CoA hydratase activity	molecular_function	0.0250099	1	1	361	1	16315	HADHA
GO:0016507	fatty acid beta-oxidation multienzyme complex	cellular_component	0.0250099	1	1	361	1	16315	HADHA
GO:0072661	protein targeting to plasma membrane	biological_process	0.0250203	1	2	361	10	16315	PACS1,ANK1
GO:0008705	methionine synthase activity	molecular_function	0.0250817	1	1	361	1	16315	MTR
GO:0000987	core promoter proximal region sequence-specific DNA binding	molecular_function	0.0251127	1	3	361	28	16315	KLF2,KLF2,KLF2,KLF2,KLF2
GO:0006975	DNA damage induced protein phosphorylation	biological_process	0.0251622	1	1	361	1	16315	ABL1
GO:0071345	cellular response to cytokine stimulus	biological_process	0.0251857	1	9	361	185	16315	CDK9
GO:0090200	positive regulation of release of cytochrome c from mitochondria	biological_process	0.0252264	1	2	361	11	16315	MLLT11,TNFSF10
GO:0000095	S-adenosylmethionine transmembrane transporter activity	molecular_function	0.025257	1	1	361	1	16315	SLC25A26
GO:0015805	S-adenosylmethionine transport	biological_process	0.025257	1	1	361	1	16315	SLC25A26
GO:0030334	regulation of cell migration	biological_process	0.0257327	1	11	361	244	16315	VCL,VCL,PECAM1
GO:0043537	negative regulation of blood vessel endothelial cell migration	biological_process	0.0258903	1	2	361	11	16315	THBS1,THBS1
GO:0016199	axon midline choice point recognition	biological_process	0.0260404	1	1	361	1	16315	APP,APP
GO:0031072	heat shock protein binding	molecular_function	0.0261857	1	5	361	72	16315	DNAJB5,DNAJB4,DNAJB1,DNAJA4,FKBP4
GO:0016651	oxidoreductase activity, acting on NADH or NADPH	molecular_function	0.0271149	1	4	361	52	16315	NDUFV1
GO:0006911	phagocytosis, engulfment	biological_process	0.0271625	1	2	361	11	16315	MFGE8
GO:0001085	RNA polymerase II transcription factor binding	molecular_function	0.0273646	1	4	361	49	16315	KLF2,KLF2,KLF2,KLF2,KLF2,ANKRD1
GO:0045454	cell redox homeostasis	biological_process	0.0278522	1	4	361	50	16315	TMX2,DNAJC10,GLRX3,TXNDC12
GO:0034341	response to interferon-gamma	biological_process	0.0281686	1	3	361	28	16315	UBD,UBD
GO:0010033	response to organic substance	biological_process	0.02831	1	27	361	802	16315	CREB,CREB,CREB,CREB,CREB,CREB
GO:0004806	triglyceride lipase activity	molecular_function	0.0283446	1	2	361	11	16315	LIPE,ATGL
GO:0048471	perinuclear region of cytoplasm	cellular_component	0.0285246	1	9	361	183	16315	RASGRP3,DCUN1D3,S100A6,ABL1,ANKRD1,CLU,APP,APP,LAMB1,MOSPD1,MOSPD1
GO:2001020	regulation of response to DNA damage stimulus	biological_process	0.028747	1	4	361	51	16315	ABL1
GO:0046580	negative regulation of Ras protein signal transduction	biological_process	0.0287662	1	2	361	12	16315	DGKZ
GO:2000195	negative regulation of female gonad development	biological_process	0.0288331	1	1	361	1	16315	ZFPM2
GO:0042254	ribosome biogenesis	biological_process	0.0288679	1	5	361	78	16315	PES1
GO:0016881	acid-amino acid ligase activity	molecular_function	0.0298986	1	10	361	211	16315	UBE2QL1,NEDD4L,NEDD4L,UBE2L6,MUL1
GO:0016620	oxidoreductase activity, acting on the aldehyde or oxo group of donors, NAD or NADP as acceptor	molecular_function	0.0303899	1	3	361	29	16315	ALDH18A1,ALDH4A1
GO:0003735	structural constituent of ribosome	molecular_function	0.0308365	1	8	361	206	16315	ENSSSCG00000024398,ENSSSCG00000027441,RPL37,RPS29,RPL11,RPS23,ENSSSCG00000027168,MRPL12
GO:0051726	regulation of cell cycle	biological_process	0.0314571	1	16	361	415	16315	ABL1,JUNB
GO:0001764	neuron migration	biological_process	0.0315099	1	5	361	78	16315	NR4A2,TUBB2A,NDEL1,ENSSSCG00000004104,TUBB4B
GO:0016884	carbon-nitrogen ligase activity, with glutamine as amido-N-donor	molecular_function	0.0315108	1	2	361	12	16315	FAAH
GO:0022900	electron transport chain	biological_process	0.0319274	1	4	361	59	16315	MT-ND3,MT-CO1
GO:0001953	negative regulation of cell-matrix adhesion	biological_process	0.031994	1	2	361	12	16315	THBS1,THBS1
GO:0005576	extracellular region	cellular_component	0.0321451	1	30	361	956	16315	ANGPTL4,POMC,C1QA,NPC2,SLPI,ZP2,THBS1,THBS1,C1R,CLU,MIF,ADAMTS8,SERPINE1,LREAP1,PBD-2,NTF4,ENSSSCG00000009285
GO:0051117	ATPase binding	molecular_function	0.0325561	1	2	361	13	16315	DNAJC10,ANK1
GO:0003779	actin binding	molecular_function	0.0326514	1	9	361	187	16315	VCL,VCL,CMYA1,ABRA,ANKRD1,DAG1,FLNC,NP_001038058.1,CNN3,ENSSSCG00000025136,ENSSSCG00000025136
GO:0043236	laminin binding	molecular_function	0.0328254	1	2	361	12	16315	THBS1,THBS1,BCAM
GO:0019915	lipid storage	biological_process	0.0329766	1	3	361	31	16315	NRIP1,STAT5B
GO:0045944	positive regulation of transcription from RNA polymerase II promoter	biological_process	0.0330648	1	18	361	495	16315	POMC,NRIP1,CHD8,KLF2,KLF2,KLF2,KLF2,KLF2,LUM,NR4A2,STAT5B,CSRNP1,ZFPM2,ABRA,SUPT4H1,CREB,CREB,CREB,CREB,CREB,CREB,FOXO1A,FOXO1A,ANKRD1,APP,APP,FADD,NR4A1,MOSPD1,MOSPD1
GO:0006807	nitrogen compound metabolic process	biological_process	0.0332482	1	103	361	3837	16315	ARID5B
GO:0005719	nuclear euchromatin	cellular_component	0.0339505	1	2	361	12	16315	CREB,CREB,CREB,CREB,CREB,CREB,TRIM24
GO:0001786	phosphatidylserine binding	molecular_function	0.0340887	1	2	361	12	16315	THBS1,THBS1,MFGE8
GO:0030336	negative regulation of cell migration	biological_process	0.0342752	1	5	361	79	16315	STK24,DAG1,SERPINE1
GO:0019752	carboxylic acid metabolic process	biological_process	0.0347821	1	17	361	442	16315	MIF
GO:0002040	sprouting angiogenesis	biological_process	0.0351944	1	3	361	32	16315	THBS1,THBS1
GO:0044212	transcription regulatory region DNA binding	molecular_function	0.0358667	1	10	361	233	16315	KLF2,KLF2,KLF2,KLF2,KLF2,CDK9,ARID5B
GO:0034115	negative regulation of heterotypic cell-cell adhesion	biological_process	0.0358722	1	1	361	2	16315	KLF2,KLF2,KLF2,KLF2,KLF2
GO:0010038	response to metal ion	biological_process	0.035975	1	5	361	78	16315	NEDD4L,NEDD4L,CUTA
GO:0043565	sequence-specific DNA binding	molecular_function	0.0360965	1	18	361	528	16315	KLF2,KLF2,KLF2,KLF2,KLF2,NR4A2,MAFF,NFIL3,NFIL3,ATF3,CREB,CREB,CREB,CREB,CREB,CREB,HSF2,FOXO1A,FOXO1A,HOXD1,ETS2,NR4A1,JUNB,TRIM24,DRAP1,ZHX2
GO:0005777	peroxisome	cellular_component	0.0373035	1	5	361	77	16315	GSTK1,DHRS4,MUL1
GO:0019787	small conjugating protein ligase activity	molecular_function	0.0373111	1	8	361	160	16315	UBE2L6
GO:0004167	dopachrome isomerase activity	molecular_function	0.0377139	1	1	361	2	16315	MIF
GO:0008585	female gonad development	biological_process	0.0385838	1	4	361	56	16315	ARID5B
GO:0021986	habenula development	biological_process	0.0386626	1	1	361	2	16315	NR4A2
GO:0046340	diacylglycerol catabolic process	biological_process	0.0391777	1	1	361	2	16315	LIPE
GO:0008124	4-alpha-hydroxytetrahydrobiopterin dehydratase activity	molecular_function	0.0392373	1	1	361	2	16315	PCBD2
GO:2001069	glycogen binding	molecular_function	0.0393681	1	1	361	2	16315	PPP1R3F,PPP1R3F
GO:0005829	cytosol	cellular_component	0.0394999	1	18	361	502	16315	DNAJB5,LIPE,ATGL,S100A6,ANKRD1,CLU,ODC1,MOCS2,TXNDC17,BAG3,LDHA
GO:0006607	NLS-bearing substrate import into nucleus	biological_process	0.0399297	1	1	361	2	16315	DAG1
GO:0008092	cytoskeletal protein binding	molecular_function	0.0401314	1	15	361	382	16315	DES,FLNC
GO:0000979	RNA polymerase II core promoter sequence-specific DNA binding	molecular_function	0.0406203	1	2	361	15	16315	STAT5B,NFIL3,NFIL3
GO:0022408	negative regulation of cell-cell adhesion	biological_process	0.0406368	1	2	361	14	16315	PODXL
GO:0006958	complement activation, classical pathway	biological_process	0.0408579	1	1	361	2	16315	C1QA
GO:0097059	CNTFR-CLCF1 complex	cellular_component	0.041115	1	1	361	2	16315	CNTFR
GO:0006956	complement activation	biological_process	0.0411816	1	2	361	14	16315	C1R
GO:0050777	negative regulation of immune response	biological_process	0.0418948	1	3	361	33	16315	COL3A1
GO:0043295	glutathione binding	molecular_function	0.0420002	1	1	361	2	16315	GSS
GO:0001543	ovarian follicle rupture	biological_process	0.0424867	1	1	361	2	16315	NRIP1
GO:0032757	positive regulation of interleukin-8 production	biological_process	0.0424911	1	2	361	14	16315	SERPINE1,FADD
GO:0000978	RNA polymerase II core promoter proximal region sequence-specific DNA binding	molecular_function	0.0428353	1	2	361	15	16315	BHLHE41,PER1
GO:0005913	cell-cell adherens junction	cellular_component	0.0435173	1	3	361	32	16315	VCL,VCL,CMYA1
GO:0023041	neuronal signal transduction	biological_process	0.044482	1	1	361	2	16315	P2RY11
GO:0045031	ATP-activated nucleotide receptor activity	molecular_function	0.044482	1	1	361	2	16315	P2RY11
GO:0032873	negative regulation of stress-activated MAPK cascade	biological_process	0.0445774	1	2	361	14	16315	DUSP10,FOXO1A,FOXO1A
GO:0019530	taurine metabolic process	biological_process	0.0448927	1	1	361	2	16315	STAT5B
GO:0006357	regulation of transcription from RNA polymerase II promoter	biological_process	0.0449652	1	26	361	807	16315	NRIP1,KLF2,KLF2,KLF2,KLF2,KLF2,STAT5B,TCEANC,SNF8,ANKRD1,ZHX2
GO:0007176	regulation of epidermal growth factor-activated receptor activity	biological_process	0.0450865	1	2	361	15	16315	APP,APP
GO:0030337	DNA polymerase processivity factor activity	molecular_function	0.0452538	1	1	361	2	16315	PCNA
GO:0090051	negative regulation of cell migration involved in sprouting angiogenesis	biological_process	0.0453528	1	1	361	2	16315	KLF2,KLF2,KLF2,KLF2,KLF2
GO:0046985	positive regulation of hemoglobin biosynthetic process	biological_process	0.0454017	1	1	361	2	16315	KLF2,KLF2,KLF2,KLF2,KLF2
GO:0005578	proteinaceous extracellular matrix	cellular_component	0.0457683	1	9	361	197	16315	ANGPTL4,LUM,ADAMTS8,LAMB1
GO:0043123	positive regulation of I-kappaB kinase/NF-kappaB cascade	biological_process	0.0457759	1	5	361	85	16315	UBD,UBD,LGALS1,MUL1,TNFSF10,FADD
GO:0003221	right ventricular cardiac muscle tissue morphogenesis	biological_process	0.0461407	1	1	361	2	16315	ZFPM2
GO:0051901	positive regulation of mitochondrial depolarization	biological_process	0.0464089	1	1	361	2	16315	MLLT11
GO:0070669	response to interleukin-2	biological_process	0.0464148	1	1	361	2	16315	STAT5B
GO:0031032	actomyosin structure organization	biological_process	0.0468456	1	3	361	35	16315	MYO18A,CNN3
GO:0032139	dinucleotide insertion or deletion binding	molecular_function	0.0469152	1	1	361	2	16315	PCNA
GO:0032044	DSIF complex	cellular_component	0.0469951	1	1	361	2	16315	SUPT4H1
GO:0004478	methionine adenosyltransferase activity	molecular_function	0.0471202	1	1	361	2	16315	MATA2
GO:0006556	S-adenosylmethionine biosynthetic process	biological_process	0.0471202	1	1	361	2	16315	MATA2
GO:0004392	heme oxygenase (decyclizing) activity	molecular_function	0.0471648	1	1	361	2	16315	HMOX2
GO:0006788	heme oxidation	biological_process	0.0471648	1	1	361	2	16315	HMOX2
GO:0001300	chronological cell aging	biological_process	0.047165	1	1	361	2	16315	SERPINE1
GO:0001885	endothelial cell development	biological_process	0.047382	1	2	361	15	16315	CCM2
GO:0070996	type 1 melanocortin receptor binding	molecular_function	0.0474233	1	1	361	2	16315	POMC
GO:0005178	integrin binding	molecular_function	0.0475306	1	3	361	34	16315	THBS1,THBS1,MFGE8,LAMB1
GO:0070051	fibrinogen binding	molecular_function	0.047944	1	1	361	2	16315	THBS1,THBS1
GO:0042770	signal transduction in response to DNA damage	biological_process	0.0481669	1	3	361	36	16315	ABL1
GO:0031508	centromeric heterochromatin formation	biological_process	0.0481865	1	1	361	2	16315	CENPV
GO:0000255	allantoin metabolic process	biological_process	0.0484743	1	1	361	2	16315	STAT5B
GO:0018343	protein farnesylation	biological_process	0.0489964	1	1	361	2	16315	FNTB
GO:0042997	negative regulation of Golgi to plasma membrane protein transport	biological_process	0.0489998	1	1	361	2	16315	PKDCC
GO:0004066	asparagine synthase (glutamine-hydrolyzing) activity	molecular_function	0.0490935	1	1	361	2	16315	ENSSSCG00000016041
GO:0006529	asparagine biosynthetic process	biological_process	0.0490935	1	1	361	2	16315	ENSSSCG00000016041
GO:0004090	carbonyl reductase (NADPH) activity	molecular_function	0.0490944	1	1	361	2	16315	DHRS4
GO:0070052	collagen V binding	molecular_function	0.0491333	1	1	361	2	16315	THBS1,THBS1
GO:0043652	engulfment of apoptotic cell	biological_process	0.0492102	1	1	361	2	16315	THBS1,THBS1
GO:0009058	biosynthetic process	biological_process	0.0492421	1	85	361	3208	16315	CCBL1
GO:0001758	retinal dehydrogenase activity	molecular_function	0.0493042	1	1	361	2	16315	DHRS4
GO:0006549	isoleucine metabolic process	biological_process	0.0493104	1	1	361	2	16315	STAT5B
GO:0006573	valine metabolic process	biological_process	0.0493104	1	1	361	2	16315	STAT5B
GO:0006600	creatine metabolic process	biological_process	0.0493113	1	1	361	2	16315	STAT5B
GO:0010748	negative regulation of plasma membrane long-chain fatty acid transport	biological_process	0.0493122	1	1	361	2	16315	THBS1,THBS1
GO:0019008	molybdopterin synthase complex	cellular_component	0.0493135	1	1	361	2	16315	MOCS2
GO:0015234	thiamine transmembrane transporter activity	molecular_function	0.0493137	1	1	361	2	16315	NP_001136139.1
GO:0015403	thiamine uptake transmembrane transporter activity	molecular_function	0.0493137	1	1	361	2	16315	NP_001136139.1
GO:0006597	spermine biosynthetic process	biological_process	0.0493144	1	1	361	2	16315	AMD1
GO:0006868	glutamine transport	biological_process	0.0493158	1	1	361	2	16315	SLC38A5
GO:0015186	L-glutamine transmembrane transporter activity	molecular_function	0.0493158	1	1	361	2	16315	SLC38A5
GO:0006101	citrate metabolic process	biological_process	0.0493164	1	1	361	2	16315	STAT5B
GO:0060397	JAK-STAT cascade involved in growth hormone signaling pathway	biological_process	0.0493209	1	1	361	2	16315	STAT5B
GO:0032957	inositol trisphosphate metabolic process	biological_process	0.0493352	1	1	361	2	16315	ITPK1
GO:0004558	alpha-glucosidase activity	molecular_function	0.0493431	1	1	361	2	16315	GANC
GO:0016509	long-chain-3-hydroxyacyl-CoA dehydrogenase activity	molecular_function	0.0493569	1	1	361	2	16315	HADHA
GO:0046449	creatinine metabolic process	biological_process	0.0493632	1	1	361	2	16315	STAT5B
GO:0030552	cAMP binding	molecular_function	0.0493807	1	1	361	2	16315	PDE4D
GO:0005102	receptor binding	molecular_function	0.0494101	1	25	361	801	16315	ECH1,ANGPTL4,POMC,NRIP1,GSTK1,PECI,CNTFR,APP,MIF,SERPINE1,NTF4
GO:0043259	laminin-10 complex	cellular_component	0.0494383	1	1	361	2	16315	LAMB1
GO:0045722	positive regulation of gluconeogenesis	biological_process	0.0494993	1	1	361	2	16315	FOXO1A,FOXO1A
GO:0060613	fat pad development	biological_process	0.0495051	1	1	361	2	16315	ARID5B
GO:0070034	telomeric RNA binding	molecular_function	0.0496034	1	1	361	2	16315	PINX1
GO:2000020	positive regulation of male gonad development	biological_process	0.0500508	1	1	361	2	16315	ZFPM2
GO:0046332	SMAD binding	molecular_function	0.0503089	1	3	361	37	16315	TOB1,COL3A1
GO:0046582	Rap GTPase activator activity	molecular_function	0.0505481	1	1	361	2	16315	RASGRP3
GO:0002504	antigen processing and presentation of peptide or polysaccharide antigen via MHC class II	biological_process	0.0507404	1	2	361	16	16315	SLA-DRA1
GO:0060412	ventricular septum morphogenesis	biological_process	0.0517395	1	2	361	16	16315	ZFPM2,SAV1
GO:0007623	circadian rhythm	biological_process	0.0519391	1	3	361	37	16315	NFIL3,NFIL3,BHLHE41
GO:0015630	microtubule cytoskeleton	cellular_component	0.0532225	1	19	361	528	16315	CENPV,CDC42EP2,KARS,PCNA
GO:0010466	negative regulation of peptidase activity	biological_process	0.0532493	1	5	361	92	16315	SLPI
GO:0016070	RNA metabolic process	biological_process	0.0545463	1	63	361	2284	16315	EIF4G2,MIF4GD
GO:0048741	skeletal muscle fiber development	biological_process	0.0546264	1	4	361	62	16315	RCAN1
GO:0009966	regulation of signal transduction	biological_process	0.0554783	1	36	361	1173	16315	CNKSR3
GO:0006955	immune response	biological_process	0.0556111	1	16	361	456	16315	SLA-P1,SLA-DRA1,THBS1,THBS1,TNFSF10,TNFSF10
GO:0010916	negative regulation of very-low-density lipoprotein particle clearance	biological_process	0.056048	1	1	361	3	16315	LREAP1
GO:0019843	rRNA binding	molecular_function	0.0562346	1	2	361	19	16315	RPL37,IMP3
GO:0003677	DNA binding	molecular_function	0.0569201	1	37	361	1296	16315	CHD8,CDK9,HIST1H2BD,NR4A2,STAT5B,KLF9,ZNF628,MAFF,POLR1D,POLR1D,ATF3,CREB,CREB,CREB,CREB,CREB,CREB,CREB,HSF2,EIF4G2,BHLHE41,MYF5,FOXO1A,FOXO1A,TCEANC,ANKRD1,HOXD1,MIF4GD,ARID5B,APP,APP,PCNA,ETS2,ENSSSCG00000001134,NR4A1,JUNB,SSRP1,DRAP1,ZHX2,TAF11
GO:0002039	p53 binding	molecular_function	0.0573382	1	3	361	37	16315	CHD8,ANKRD1,TRIM24
GO:0042558	pteridine-containing compound metabolic process	biological_process	0.0576411	1	2	361	17	16315	MTR
GO:0016525	negative regulation of angiogenesis	biological_process	0.0576788	1	3	361	38	16315	THBS1,THBS1
GO:0010951	negative regulation of endopeptidase activity	biological_process	0.0582469	1	4	361	64	16315	SERPINE1
GO:0008088	axon cargo transport	biological_process	0.0583009	1	2	361	16	16315	APP,APP
GO:0003924	GTPase activity	molecular_function	0.0583918	1	7	361	153	16315	GBP1,TUBB2A,ENSSSCG00000016216,TUBA1B,TUBB4B,SRPR,RRAD
GO:0005840	ribosome	cellular_component	0.0593922	1	8	361	231	16315	ENSSSCG00000024398,ENSSSCG00000027441,RPL37,RPS29,RPL11,RPS23,ENSSSCG00000027168,MRPL12
GO:0060415	muscle tissue morphogenesis	biological_process	0.0593982	1	3	361	40	16315	MYF5
GO:0015031	protein transport	biological_process	0.0595199	1	20	361	584	16315	ATG4D,MON1A,AP3S2
GO:0000502	proteasome complex	cellular_component	0.0596182	1	3	361	41	16315	PSMA2,PSMB4,PSMD2
GO:0016567	protein ubiquitination	biological_process	0.059798	1	10	361	241	16315	UBD,UBD,RNF19A,NEDD4L,KCTD13,MUL1,TRIM24
GO:0010739	positive regulation of protein kinase A signaling cascade	biological_process	0.0602139	1	1	361	4	16315	MIF
GO:0034663	endoplasmic reticulum chaperone complex	cellular_component	0.0603667	1	1	361	3	16315	DNAJC10
GO:0070887	cellular response to chemical stimulus	biological_process	0.0605236	1	23	361	712	16315	SERPINE1
GO:0032405	MutLalpha complex binding	molecular_function	0.0606296	1	1	361	3	16315	PCNA
GO:0045415	negative regulation of interleukin-8 biosynthetic process	biological_process	0.0606457	1	1	361	3	16315	KLF2,KLF2,KLF2,KLF2,KLF2
GO:0002042	cell migration involved in sprouting angiogenesis	biological_process	0.0611455	1	2	361	18	16315	NR4A1
GO:0021954	central nervous system neuron development	biological_process	0.0618637	1	3	361	38	16315	BTG2
GO:0042809	vitamin D receptor binding	molecular_function	0.062288	1	1	361	3	16315	TAF11
GO:0030423	targeting of mRNA for destruction involved in RNA interference	biological_process	0.06286	1	1	361	3	16315	CLP1
GO:2000465	regulation of glycogen (starch) synthase activity	biological_process	0.0631595	1	1	361	3	16315	PPP1R3F,PPP1R3F
GO:0001568	blood vessel development	biological_process	0.0632674	1	12	361	319	16315	CCM2,COL3A1,FOXO1A,FOXO1A
GO:0071346	cellular response to interferon-gamma	biological_process	0.0633348	1	2	361	17	16315	AQP4
GO:0016042	lipid catabolic process	biological_process	0.063913	1	6	361	121	16315	LIPE
GO:0008138	protein tyrosine/serine/threonine phosphatase activity	molecular_function	0.0641093	1	3	361	42	16315	ENSSSCG00000025941,DUSP10,DUSP26
GO:0051733	polydeoxyribonucleotide kinase activity	molecular_function	0.0641348	1	1	361	3	16315	CLP1
GO:2000427	positive regulation of apoptotic cell clearance	biological_process	0.0641351	1	1	361	3	16315	MFGE8
GO:0005787	signal peptidase complex	cellular_component	0.0642023	1	1	361	3	16315	SPCS3
GO:0046983	protein dimerization activity	molecular_function	0.0642918	1	17	361	490	16315	NFIL3,NFIL3,ATF3,CREB,CREB,CREB,CREB,CREB,CREB,JUNB
GO:0010467	gene expression	biological_process	0.0643769	1	76	361	2887	16315	NR4A2
GO:0008429	phosphatidylethanolamine binding	molecular_function	0.064503	1	1	361	3	16315	MFGE8
GO:0000214	tRNA-intron endonuclease complex	cellular_component	0.0650054	1	1	361	3	16315	CLP1
GO:0001667	ameboidal cell migration	biological_process	0.0651958	1	4	361	67	16315	CENPV
GO:0070842	aggresome assembly	biological_process	0.0652838	1	1	361	3	16315	UBD,UBD
GO:0017016	Ras GTPase binding	molecular_function	0.0657061	1	4	361	62	16315	RASGRP3
GO:0010629	negative regulation of gene expression	biological_process	0.065749	1	20	361	614	16315	MIF
GO:0010469	regulation of receptor activity	biological_process	0.0673996	1	3	361	40	16315	SERPINE1
GO:0034613	cellular protein localization	biological_process	0.0674319	1	19	361	558	16315	GAS8
GO:0005839	proteasome core complex	cellular_component	0.0676652	1	2	361	21	16315	PSMA2,PSMB4
GO:0006107	oxaloacetate metabolic process	biological_process	0.0678302	1	1	361	3	16315	STAT5B
GO:0071569	protein ufmylation	biological_process	0.0678491	1	1	361	3	16315	UFC1
GO:0031265	CD95 death-inducing signaling complex	cellular_component	0.0683369	1	1	361	3	16315	FADD
GO:0070562	regulation of vitamin D receptor signaling pathway	biological_process	0.0687631	1	1	361	3	16315	TRIM24
GO:0010898	positive regulation of triglyceride catabolic process	biological_process	0.0689664	1	1	361	4	16315	ATGL
GO:0010468	regulation of gene expression	biological_process	0.0691405	1	58	361	2117	16315	APP,APP
GO:0008022	protein C-terminus binding	molecular_function	0.0691565	1	5	361	93	16315	PLEKHB1,ABL1,MIF4GD,HOMER3,DGKZ
GO:0043409	negative regulation of MAPKKK cascade	biological_process	0.0693304	1	3	361	40	16315	DAG1
GO:0010891	negative regulation of sequestering of triglyceride	biological_process	0.0693908	1	1	361	3	16315	ATGL
GO:0008568	microtubule-severing ATPase activity	molecular_function	0.0693967	1	1	361	3	16315	ENSSSCG00000004104
GO:0060325	face morphogenesis	biological_process	0.0697066	1	2	361	18	16315	CSRNP1,ARID5B
GO:0030422	production of siRNA involved in RNA interference	biological_process	0.0697523	1	1	361	3	16315	PRKRA
GO:0010756	positive regulation of plasminogen activation	biological_process	0.0698497	1	1	361	3	16315	C9ORF46
GO:0019985	translesion synthesis	biological_process	0.0705067	1	1	361	3	16315	PCNA
GO:0050847	progesterone receptor signaling pathway	biological_process	0.0708053	1	1	361	3	16315	KLF9
GO:0019871	sodium channel inhibitor activity	molecular_function	0.0708593	1	1	361	3	16315	NEDD4L,NEDD4L
GO:0033629	negative regulation of cell adhesion mediated by integrin	biological_process	0.0708961	1	1	361	3	16315	SERPINE1
GO:0032190	acrosin binding	molecular_function	0.0717295	1	1	361	3	16315	ZP2
GO:0032854	positive regulation of Rap GTPase activity	biological_process	0.0718297	1	1	361	3	16315	RASGRP3
GO:0001514	selenocysteine incorporation	biological_process	0.0721041	1	1	361	3	16315	TRNAU1AP
GO:0051013	microtubule severing	biological_process	0.0723445	1	1	361	3	16315	ENSSSCG00000004104
GO:0005726	perichromatin fibrils	cellular_component	0.0725145	1	1	361	3	16315	TRIM24
GO:0090370	negative regulation of cholesterol efflux	biological_process	0.0725488	1	1	361	3	16315	EGF
GO:0034056	estrogen response element binding	molecular_function	0.0726075	1	1	361	3	16315	TRIM24
GO:0090141	positive regulation of mitochondrial fission	biological_process	0.0727871	1	1	361	3	16315	MUL1
GO:0007016	cytoskeletal anchoring at plasma membrane	biological_process	0.0730457	1	1	361	3	16315	DAG1
GO:0031588	AMP-activated protein kinase complex	cellular_component	0.0730458	1	1	361	3	16315	PRKAG1
GO:0006105	succinate metabolic process	biological_process	0.0730495	1	1	361	3	16315	STAT5B
GO:0008518	reduced folate carrier activity	molecular_function	0.0730517	1	1	361	3	16315	NP_001136139.1
GO:0042448	progesterone metabolic process	biological_process	0.0730524	1	1	361	3	16315	STAT5B
GO:0031528	microvillus membrane	cellular_component	0.0730531	1	1	361	3	16315	PODXL
GO:0016212	kynurenine-oxoglutarate transaminase activity	molecular_function	0.0730564	1	1	361	3	16315	CCBL1
GO:0043154	negative regulation of cysteine-type endopeptidase activity involved in apoptotic process	biological_process	0.0730628	1	3	361	44	16315	KLF2,KLF2,KLF2,KLF2,KLF2,THBS1,THBS1,NR4A1
GO:0004897	ciliary neurotrophic factor receptor activity	molecular_function	0.073086	1	1	361	3	16315	CNTFR
GO:0005047	signal recognition particle binding	molecular_function	0.0730883	1	1	361	3	16315	SRPR
GO:0019534	toxin transporter activity	molecular_function	0.0731037	1	1	361	3	16315	SLC7A8,SLC7A8
GO:0043208	glycosphingolipid binding	molecular_function	0.0731703	1	1	361	3	16315	LAMB1
GO:0032026	response to magnesium ion	biological_process	0.0733138	1	1	361	3	16315	THBS1,THBS1
GO:0047372	acylglycerol lipase activity	molecular_function	0.073337	1	1	361	3	16315	FAAH
GO:0042493	response to drug	biological_process	0.0733883	1	5	361	94	16315	THBS1,THBS1,CREB,CREB,CREB,CREB,CREB,CREB
GO:0010763	positive regulation of fibroblast migration	biological_process	0.0734437	1	1	361	3	16315	THBS1,THBS1
GO:0006198	cAMP catabolic process	biological_process	0.0734696	1	1	361	3	16315	PDE4D
GO:0004298	threonine-type endopeptidase activity	molecular_function	0.073627	1	2	361	22	16315	PSMA2,PSMB4
GO:0006749	glutathione metabolic process	biological_process	0.0738681	1	2	361	19	16315	GSTK1
GO:0014731	spectrin-associated cytoskeleton	cellular_component	0.0739282	1	1	361	3	16315	ANK1
GO:0033268	node of Ranvier	cellular_component	0.073963	1	1	361	3	16315	DAG1
GO:0048669	collateral sprouting in absence of injury	biological_process	0.0740773	1	1	361	3	16315	APP,APP
GO:0051563	smooth endoplasmic reticulum calcium ion homeostasis	biological_process	0.0741224	1	1	361	3	16315	APP,APP
GO:0051124	synaptic growth at neuromuscular junction	biological_process	0.0742415	1	1	361	3	16315	APP,APP
GO:0050790	regulation of catalytic activity	biological_process	0.0743608	1	27	361	868	16315	PSMD2
GO:0022627	cytosolic small ribosomal subunit	cellular_component	0.0746976	1	2	361	26	16315	RPS29,RPS23
GO:0010596	negative regulation of endothelial cell migration	biological_process	0.0756531	1	2	361	20	16315	THBS1,THBS1
GO:0006351	transcription, DNA-dependent	biological_process	0.075751	1	52	361	1892	16315	POLR2H,NR4A2,KLF9,NFIL3,NFIL3,POLR1D,POLR1D,BHLHE41,FOXO1A,TCEANC,NR4A1
GO:0001078	RNA polymerase II core promoter proximal region sequence-specific DNA binding transcription factor activity involved in negative regulation of transcription	molecular_function	0.0764374	1	2	361	21	16315	NFIL3,NFIL3,BHLHE41
GO:0017089	glycolipid transporter activity	molecular_function	0.0766009	1	1	361	4	16315	GLTP
GO:0046836	glycolipid transport	biological_process	0.0766009	1	1	361	4	16315	GLTP
GO:0035257	nuclear hormone receptor binding	molecular_function	0.0766782	1	4	361	68	16315	NRIP1
GO:0042551	neuron maturation	biological_process	0.0775019	1	2	361	20	16315	NR4A2
GO:0001944	vasculature development	biological_process	0.07771	1	12	361	330	16315	CCM2
GO:0005891	voltage-gated calcium channel complex	cellular_component	0.0779263	1	2	361	19	16315	CACNA2D1
GO:0008190	eukaryotic initiation factor 4E binding	molecular_function	0.0781436	1	1	361	4	16315	EIF4EBP1
GO:0008104	protein localization	biological_process	0.0788214	1	26	361	828	16315	CUTA,ENSSSCG00000004104
GO:0051329	interphase of mitotic cell cycle	biological_process	0.0800353	1	6	361	129	16315	ENSSSCG00000004104
GO:0034394	protein localization at cell surface	biological_process	0.0805596	1	2	361	21	16315	VCL,VCL
GO:0005730	nucleolus	cellular_component	0.0807394	1	13	361	359	16315	MIDN,CPT2,HADHA,PODXL,PINX1,ATF3,CEP85,ABL1,NUP153,RPL11,IMP3,PES1,DDX46
GO:0006122	mitochondrial electron transport, ubiquinol to cytochrome c	biological_process	0.0808593	1	1	361	4	16315	UQCRC1
GO:0021955	central nervous system neuron axonogenesis	biological_process	0.0811544	1	2	361	19	16315	NDEL1
GO:0004129	cytochrome-c oxidase activity	molecular_function	0.0812227	1	2	361	26	16315	COX5B,MT-CO1
GO:0006729	tetrahydrobiopterin biosynthetic process	biological_process	0.0812795	1	1	361	4	16315	PCBD2
GO:0030335	positive regulation of cell migration	biological_process	0.0813743	1	6	361	132	16315	ENSSSCG00000025941,PODXL,THBS1,THBS1,COL3A1,LAMB1
GO:0005762	mitochondrial large ribosomal subunit	cellular_component	0.0822079	1	1	361	4	16315	MRPL12
GO:0046661	male sex differentiation	biological_process	0.0822981	1	4	361	73	16315	FKBP4
GO:0031781	type 3 melanocortin receptor binding	molecular_function	0.0839062	1	1	361	4	16315	POMC
GO:0031782	type 4 melanocortin receptor binding	molecular_function	0.0839062	1	1	361	4	16315	POMC
GO:0030155	regulation of cell adhesion	biological_process	0.0842082	1	7	361	160	16315	STAT5B,EDG1
GO:0034612	response to tumor necrosis factor	biological_process	0.0844222	1	3	361	46	16315	UBD,UBD
GO:0045930	negative regulation of mitotic cell cycle	biological_process	0.0846678	1	2	361	21	16315	DGKZ
GO:0016831	carboxy-lyase activity	molecular_function	0.0847867	1	2	361	21	16315	AMD1
GO:0035166	post-embryonic hemopoiesis	biological_process	0.0857723	1	1	361	4	16315	KLF2,KLF2,KLF2,KLF2,KLF2
GO:0035264	multicellular organism growth	biological_process	0.0858199	1	5	361	101	16315	CCM2,ARID5B
GO:0004505	phenylalanine 4-monooxygenase activity	molecular_function	0.0866106	1	1	361	4	16315	PCBD2
GO:0045088	regulation of innate immune response	biological_process	0.0867745	1	4	361	71	16315	DUSP10
GO:0048019	receptor antagonist activity	molecular_function	0.0868547	1	1	361	4	16315	LREAP1
GO:0010832	negative regulation of myotube differentiation	biological_process	0.0868689	1	1	361	4	16315	BHLHE41
GO:0019882	antigen processing and presentation	biological_process	0.0869264	1	3	361	48	16315	SLA-P1,SLA-DRA1
GO:0051005	negative regulation of lipoprotein lipase activity	biological_process	0.0869357	1	1	361	4	16315	ANGPTL4
GO:0007595	lactation	biological_process	0.0870005	1	2	361	21	16315	STAT5B,CREB,CREB,CREB,CREB,CREB,CREB
GO:0051425	PTB domain binding	molecular_function	0.0878368	1	1	361	4	16315	APP
GO:0001515	opioid peptide activity	molecular_function	0.0879163	1	1	361	4	16315	CDC42EP2
GO:0006139	nucleobase-containing compound metabolic process	biological_process	0.0880786	1	89	361	3433	16315	NDUFA10
GO:0070326	very-low-density lipoprotein particle receptor binding	molecular_function	0.0888974	1	1	361	4	16315	LREAP1
GO:0005875	microtubule associated complex	cellular_component	0.0889202	1	3	361	44	16315	NDEL1,FNTB
GO:0045741	positive regulation of epidermal growth factor-activated receptor activity	biological_process	0.0894701	1	1	361	5	16315	EGF
GO:0006094	gluconeogenesis	biological_process	0.0897796	1	2	361	22	16315	ATF3
GO:0045588	positive regulation of gamma-delta T cell differentiation	biological_process	0.0900818	1	1	361	4	16315	STAT5B
GO:0070120	ciliary neurotrophic factor-mediated signaling pathway	biological_process	0.0903957	1	1	361	4	16315	CNTFR
GO:0046834	lipid phosphorylation	biological_process	0.0907646	1	3	361	44	16315	PIK3C2B,DGKZ
GO:0019899	enzyme binding	molecular_function	0.090857	1	22	361	693	16315	NPC2,SLPI,CUTA,LAMB1
GO:0005856	cytoskeleton	cellular_component	0.0908774	1	30	361	980	16315	VCL,VCL,LMOD2,DES,TUBB2A,RNF19A,MYO18A,ELMOD3,ENSSSCG00000016216,TUBA1B,PPL,TUBB4B
GO:2000279	negative regulation of DNA biosynthetic process	biological_process	0.0914083	1	1	361	4	16315	ANKRD1
GO:0035024	negative regulation of Rho protein signal transduction	biological_process	0.091536	1	1	361	4	16315	KCTD13
GO:0060340	positive regulation of type I interferon-mediated signaling pathway	biological_process	0.0915958	1	1	361	4	16315	FADD
GO:0071318	cellular response to ATP	biological_process	0.0916221	1	1	361	4	16315	P2RY11
GO:0033634	positive regulation of cell-cell adhesion mediated by integrin	biological_process	0.0917832	1	1	361	4	16315	PODXL
GO:0006290	pyrimidine dimer repair	biological_process	0.092083	1	1	361	4	16315	POLH
GO:0044070	regulation of anion transport	biological_process	0.0922749	1	2	361	21	16315	TOMM40
GO:0032870	cellular response to hormone stimulus	biological_process	0.0937942	1	7	361	167	16315	STAT5B
GO:0006629	lipid metabolic process	biological_process	0.0937998	1	20	361	620	16315	HADHA,ATGL,IAH1,LRP10,ACSL4
GO:0000085	G2 phase of mitotic cell cycle	biological_process	0.0938479	1	1	361	4	16315	APP,APP
GO:0070876	SOSS complex	cellular_component	0.0939191	1	1	361	4	16315	OBFC2B
GO:0018149	peptide cross-linking	biological_process	0.0942846	1	2	361	23	16315	THBS1,THBS1,COL3A1
GO:0009986	cell surface	cellular_component	0.0944961	1	11	361	301	16315	TNFRSF12A,HSPA2,BCAM,APP,MIF,CD59
GO:0060044	negative regulation of cardiac muscle cell proliferation	biological_process	0.0948405	1	1	361	4	16315	SAV1
GO:0010637	negative regulation of mitochondrial fusion	biological_process	0.0949316	1	1	361	4	16315	MUL1
GO:0006605	protein targeting	biological_process	0.0951066	1	9	361	235	16315	RPL11
GO:0051258	protein polymerization	biological_process	0.0951629	1	5	361	107	16315	TUBB2A,ENSSSCG00000016216,TUBA1B,TUBB4B
GO:0001102	RNA polymerase II activating transcription factor binding	molecular_function	0.0953172	1	2	361	23	16315	CREB,CREB,CREB,CREB,CREB,CREB,BHLHE41
GO:0008631	induction of apoptosis by oxidative stress	biological_process	0.0958268	1	1	361	4	16315	STK24
GO:0042416	dopamine biosynthetic process	biological_process	0.0958528	1	1	361	4	16315	NR4A2
GO:0004679	AMP-activated protein kinase activity	molecular_function	0.0960758	1	1	361	4	16315	PRKAG1
GO:0021670	lateral ventricle development	biological_process	0.0961263	1	1	361	4	16315	DPCD
GO:0032819	positive regulation of natural killer cell proliferation	biological_process	0.096183	1	1	361	4	16315	STAT5B
GO:0001561	fatty acid alpha-oxidation	biological_process	0.0961832	1	1	361	4	16315	PHYH
GO:0002162	dystroglycan binding	molecular_function	0.0961947	1	1	361	4	16315	VCL,VCL
GO:0003351	epithelial cilium movement	biological_process	0.0962067	1	1	361	4	16315	DPCD
GO:0004467	long-chain fatty acid-CoA ligase activity	molecular_function	0.0962181	1	1	361	4	16315	ACSL4
GO:0003873	6-phosphofructo-2-kinase activity	molecular_function	0.0962222	1	1	361	4	16315	PFKFB1,PFKFB1
GO:0004331	fructose-2,6-bisphosphate 2-phosphatase activity	molecular_function	0.0962222	1	1	361	4	16315	PFKFB1,PFKFB1
GO:0006003	fructose 2,6-bisphosphate metabolic process	biological_process	0.0962222	1	1	361	4	16315	PFKFB1,PFKFB1
GO:0033344	cholesterol efflux	biological_process	0.096251	1	2	361	24	16315	NPC2,NPC2
GO:0005606	laminin-1 complex	cellular_component	0.0962518	1	1	361	4	16315	LAMB1
GO:0030008	TRAPP complex	cellular_component	0.0962569	1	1	361	5	16315	TRAPPC5
GO:0043206	fibril organization	biological_process	0.0962778	1	1	361	4	16315	COL3A1
GO:0008898	homocysteine S-methyltransferase activity	molecular_function	0.0963011	1	1	361	4	16315	MTR
GO:0030485	smooth muscle contractile fiber	cellular_component	0.0963136	1	1	361	4	16315	PECAM1
GO:0016208	AMP binding	molecular_function	0.0963211	1	1	361	4	16315	PRKAG1
GO:0032045	guanyl-nucleotide exchange factor complex	cellular_component	0.0963462	1	1	361	4	16315	RASGRP3
GO:0060548	negative regulation of cell death	biological_process	0.0964795	1	11	361	308	16315	ZFPM2
GO:0009791	post-embryonic development	biological_process	0.0977101	1	4	361	74	16315	NR4A2,CSRNP1,ARID5B
GO:0005868	cytoplasmic dynein complex	cellular_component	0.0981884	1	1	361	4	16315	DYNLRB1
GO:0042473	outer ear morphogenesis	biological_process	0.0982845	1	1	361	5	16315	PRKRA
GO:0006184	GTP catabolic process	biological_process	0.0987113	1	12	361	334	16315	GBP1,TUBB2A,ENSSSCG00000016216,TUBA1B,TUBB4B,SRPR,RRAD
GO:0034366	spherical high-density lipoprotein particle	cellular_component	0.099521	1	1	361	6	16315	CLU,CLU
GO:0070672	response to interleukin-15	biological_process	0.101379	1	1	361	5	16315	STAT5B
GO:2000096	positive regulation of Wnt receptor signaling pathway, planar cell polarity pathway	biological_process	0.101483	1	1	361	4	16315	MLLT3
GO:0003376	sphingolipid signaling pathway	biological_process	0.101981	1	1	361	6	16315	EDG1
GO:0038036	sphingosine-1-phosphate receptor activity	molecular_function	0.101981	1	1	361	6	16315	EDG1
GO:0032091	negative regulation of protein binding	biological_process	0.103021	1	2	361	25	16315	SLPI,LREAP1
GO:0006417	regulation of translation	biological_process	0.103532	1	5	361	107	16315	APP,APP
GO:0045786	negative regulation of cell cycle	biological_process	0.104327	1	8	361	207	16315	RNF167
GO:0006355	regulation of transcription, DNA-dependent	biological_process	0.104475	1	49	361	1813	16315	NR4A2,STAT5B,CSRNP1,KLF9,ZNF628,MAFF,NFIL3,NFIL3,SUPT4H1,ATF3,CREB,CREB,CREB,CREB,CREB,CREB,HSF2,ENSSSCG00000010993,L3MBTL3,BHLHE41,MYF5,FOXO1A,FOXO1A,HOXD1,MLLT3,ETS2,PER1,NR4A1,JUNB,ZHX2
GO:0006388	tRNA splicing, via endonucleolytic cleavage and ligation	biological_process	0.104538	1	1	361	5	16315	CLP1
GO:0034333	adherens junction assembly	biological_process	0.104607	1	1	361	5	16315	VCL,VCL
GO:0007262	STAT protein import into nucleus	biological_process	0.104641	1	1	361	5	16315	EGF
GO:0003857	3-hydroxyacyl-CoA dehydrogenase activity	molecular_function	0.105674	1	1	361	5	16315	HADHA
GO:0032864	activation of Cdc42 GTPase activity	biological_process	0.105751	1	1	361	5	16315	NDEL1
GO:0032813	tumor necrosis factor receptor superfamily binding	molecular_function	0.106223	1	2	361	26	16315	FADD
GO:0006091	generation of precursor metabolites and energy	biological_process	0.106257	1	7	361	182	16315	POMC
GO:0032784	regulation of transcription elongation, DNA-dependent	biological_process	0.106277	1	2	361	23	16315	TCEANC
GO:0005744	mitochondrial inner membrane presequence translocase complex	cellular_component	0.106611	1	1	361	5	16315	ENSSSCG00000023263
GO:0051603	proteolysis involved in cellular protein catabolic process	biological_process	0.106818	1	10	361	271	16315	PSMA2,PSMB4
GO:0043426	MRF binding	molecular_function	0.107331	1	1	361	5	16315	BHLHE41
GO:0001671	ATPase activator activity	molecular_function	0.107438	1	1	361	5	16315	DNAJC10
GO:0032438	melanosome organization	biological_process	0.107965	1	1	361	5	16315	CNO
GO:0042296	ISG15 ligase activity	molecular_function	0.108133	1	1	361	5	16315	UBE2L6
GO:0015250	water channel activity	molecular_function	0.108167	1	1	361	5	16315	AQP4
GO:0070628	proteasome binding	molecular_function	0.108594	1	1	361	5	16315	UBD,UBD
GO:0030522	intracellular receptor mediated signaling pathway	biological_process	0.109065	1	5	361	108	16315	NR4A2,NR4A1
GO:0010766	negative regulation of sodium ion transport	biological_process	0.109076	1	1	361	5	16315	NEDD4L,NEDD4L
GO:0040018	positive regulation of multicellular organism growth	biological_process	0.10924	1	2	361	25	16315	STAT5B,CREB,CREB,CREB,CREB,CREB,CREB
GO:0031624	ubiquitin conjugating enzyme binding	molecular_function	0.109421	1	1	361	5	16315	ZMYM2
GO:0015179	L-amino acid transmembrane transporter activity	molecular_function	0.109709	1	2	361	24	16315	SLC7A8,SLC7A8
GO:0006777	Mo-molybdopterin cofactor biosynthetic process	biological_process	0.109724	1	1	361	5	16315	MOCS2
GO:0015171	amino acid transmembrane transporter activity	molecular_function	0.109749	1	3	361	49	16315	SLC7A8,SLC7A8
GO:0010614	negative regulation of cardiac muscle hypertrophy	biological_process	0.110256	1	1	361	5	16315	GLRX3
GO:0031252	cell leading edge	cellular_component	0.110532	1	6	361	135	16315	NDEL1
GO:0019221	cytokine-mediated signaling pathway	biological_process	0.110652	1	6	361	144	16315	STAT5B,KLF6
GO:0004459	L-lactate dehydrogenase activity	molecular_function	0.110925	1	1	361	6	16315	LDHA
GO:0001570	vasculogenesis	biological_process	0.110947	1	3	361	51	16315	ZFPM2,CCM2,JUNB
GO:0042826	histone deacetylase binding	molecular_function	0.111054	1	3	361	50	16315	NRIP1,BHLHE41,ANKRD1
GO:0007141	male meiosis I	biological_process	0.1112	1	1	361	5	16315	HSPA2
GO:0000731	DNA synthesis involved in DNA repair	biological_process	0.111297	1	1	361	5	16315	POLH
GO:0071363	cellular response to growth factor stimulus	biological_process	0.111965	1	5	361	111	16315	KLF2,KLF2,KLF2,KLF2,KLF2,CREB,CREB,CREB,CREB,CREB,CREB
GO:0051087	chaperone binding	molecular_function	0.112846	1	2	361	25	16315	DNAJC10,BAG3
GO:0045579	positive regulation of B cell differentiation	biological_process	0.113133	1	1	361	5	16315	STAT5B
GO:0045749	negative regulation of S phase of mitotic cell cycle	biological_process	0.113182	1	1	361	5	16315	DCUN1D3
GO:0048008	platelet-derived growth factor receptor signaling pathway	biological_process	0.113845	1	2	361	24	16315	CSRNP1,ARID5B
GO:0031264	death-inducing signaling complex	cellular_component	0.114308	1	1	361	5	16315	FADD
GO:0060021	palate development	biological_process	0.115524	1	3	361	52	16315	PKDCC,CSRNP1,ARID5B
GO:0018106	peptidyl-histidine phosphorylation	biological_process	0.115675	1	1	361	5	16315	PDK4
GO:0004311	farnesyltranstransferase activity	molecular_function	0.117279	1	1	361	5	16315	FNTB
GO:0070938	contractile ring	cellular_component	0.117975	1	1	361	5	16315	DAG1
GO:0008344	adult locomotory behavior	biological_process	0.118034	1	3	361	52	16315	NR4A2,APP,APP,NTF4
GO:0008090	retrograde axon cargo transport	biological_process	0.118319	1	1	361	5	16315	NDEL1
GO:0031957	very long-chain fatty acid-CoA ligase activity	molecular_function	0.118784	1	1	361	5	16315	ACSL4
GO:0006000	fructose metabolic process	biological_process	0.118796	1	1	361	5	16315	PFKFB1,PFKFB1
GO:0045086	positive regulation of interleukin-2 biosynthetic process	biological_process	0.118961	1	1	361	5	16315	STAT5B
GO:0097110	scaffold protein binding	molecular_function	0.119094	1	1	361	5	16315	PDE4D
GO:0043589	skin morphogenesis	biological_process	0.119118	1	1	361	5	16315	COL3A1
GO:0004601	peroxidase activity	molecular_function	0.119173	1	2	361	26	16315	TXNDC17
GO:0009897	external side of plasma membrane	cellular_component	0.120051	1	6	361	142	16315	THBS1,THBS1,MFGE8,EDG1,AQP4,PECAM1
GO:0051707	response to other organism	biological_process	0.120064	1	10	361	293	16315	BECN1
GO:0043518	negative regulation of DNA damage response, signal transduction by p53 class mediator	biological_process	0.120382	1	1	361	6	16315	MIF
GO:0031077	post-embryonic camera-type eye development	biological_process	0.120477	1	1	361	6	16315	KLF2,KLF2,KLF2,KLF2,KLF2
GO:0007612	learning	biological_process	0.121776	1	3	361	51	16315	AAAS
GO:0005886	plasma membrane	cellular_component	0.12243	1	45	361	1621	16315	NP_001136139.1,SLA-DRA1,VCL,VCL,CMYA1,PODXL,SLC7A8,SLC7A8,CDC42EP2,ABRA,CAPNS1,ZP2,CISH,TNFRSF12A,BCAM,DNAJB4,DAG1,HMOX2,APP,APP,ENSSSCG00000004104,FLNC,LREAP1,AQP4,PCDH1,PECAM1,EGF,ZHX2,ANK1,CD59,RAPSN,BAG3,RILPL1
GO:0007548	sex differentiation	biological_process	0.122976	1	6	361	149	16315	STAT5B,CNTFR
GO:0007528	neuromuscular junction development	biological_process	0.123585	1	2	361	25	16315	KY
GO:0014912	negative regulation of smooth muscle cell migration	biological_process	0.123989	1	1	361	6	16315	SERPINE1
GO:0045945	positive regulation of transcription from RNA polymerase III promoter	biological_process	0.125147	1	1	361	6	16315	CHD8
GO:0051788	response to misfolded protein	biological_process	0.125896	1	1	361	6	16315	CLU,CLU
GO:0070207	protein homotrimerization	biological_process	0.127005	1	1	361	6	16315	MIF
GO:0045885	positive regulation of survival gene product expression	biological_process	0.127065	1	1	361	6	16315	STAT5B
GO:0005518	collagen binding	molecular_function	0.127533	1	2	361	26	16315	LUM
GO:0031463	Cul3-RING ubiquitin ligase complex	cellular_component	0.127666	1	1	361	6	16315	KCTD13
GO:0031594	neuromuscular junction	cellular_component	0.129776	1	2	361	26	16315	DES,APP,APP
GO:0050829	defense response to Gram-negative bacterium	biological_process	0.13086	1	1	361	6	16315	SERPINE1
GO:0031419	cobalamin binding	molecular_function	0.131231	1	1	361	6	16315	MTR
GO:0019941	modification-dependent protein catabolic process	biological_process	0.131794	1	9	361	246	16315	UBE2L6
GO:0006390	transcription from mitochondrial promoter	biological_process	0.132413	1	1	361	7	16315	MRPL12
GO:0006614	SRP-dependent cotranslational protein targeting to membrane	biological_process	0.132772	1	1	361	6	16315	SRPR
GO:0016528	sarcoplasm	cellular_component	0.133127	1	2	361	26	16315	NOL3
GO:0043086	negative regulation of catalytic activity	biological_process	0.133739	1	10	361	294	16315	DGKZ
GO:0005782	peroxisomal matrix	cellular_component	0.13388	1	1	361	6	16315	POMC
GO:0042053	regulation of dopamine metabolic process	biological_process	0.133946	1	1	361	6	16315	NR4A2
GO:0031083	BLOC-1 complex	cellular_component	0.134101	1	1	361	7	16315	CNO
GO:0000187	activation of MAPK activity	biological_process	0.134282	1	3	361	55	16315	THBS1,THBS1,AVPI1
GO:0045892	negative regulation of transcription, DNA-dependent	biological_process	0.134533	1	17	361	559	16315	CHD8,KLF2,KLF2,KLF2,KLF2,KLF2,ZFPM2,ATF3,MYF5,CIR1,PER1,TRIM24,ZHX2
GO:0070295	renal water absorption	biological_process	0.134565	1	1	361	6	16315	AQP4
GO:0048679	regulation of axon regeneration	biological_process	0.134884	1	1	361	6	16315	STK24
GO:0006909	phagocytosis	biological_process	0.13557	1	3	361	55	16315	ELMOD3
GO:0048730	epidermis morphogenesis	biological_process	0.136338	1	2	361	28	16315	KLF2,KLF2,KLF2,KLF2,KLF2
GO:0048146	positive regulation of fibroblast proliferation	biological_process	0.136784	1	2	361	29	16315	FNTB,MIF
GO:0043517	positive regulation of DNA damage response, signal transduction by p53 class mediator	biological_process	0.136974	1	1	361	6	16315	ANKRD1
GO:0001516	prostaglandin biosynthetic process	biological_process	0.137131	1	1	361	7	16315	MIF
GO:0006120	mitochondrial electron transport, NADH to ubiquinone	biological_process	0.137457	1	1	361	7	16315	NDUFB8
GO:0048845	venous blood vessel morphogenesis	biological_process	0.137703	1	1	361	6	16315	CCM2
GO:0043508	negative regulation of JUN kinase activity	biological_process	0.137937	1	1	361	6	16315	DUSP10
GO:0043066	negative regulation of apoptosis	biological_process	0.138009	1	10	361	295	16315	ANGPTL4,CHD8,STAT5B,THBS1,THBS1,CLU,CLU,MIF,SERPINE1,BAG3
GO:0046697	decidualization	biological_process	0.138276	1	1	361	8	16315	JUNB
GO:0035413	positive regulation of catenin import into nucleus	biological_process	0.13879	1	1	361	6	16315	EGF
GO:0043011	myeloid dendritic cell differentiation	biological_process	0.13951	1	1	361	7	16315	UBD,UBD
GO:0035025	positive regulation of Rho protein signal transduction	biological_process	0.139944	1	1	361	7	16315	ABRA
GO:0032825	positive regulation of natural killer cell differentiation	biological_process	0.139978	1	1	361	6	16315	STAT5B
GO:0071391	cellular response to estrogen stimulus	biological_process	0.139994	1	1	361	6	16315	TRIM24
GO:0060334	regulation of interferon-gamma-mediated signaling pathway	biological_process	0.140002	1	1	361	6	16315	HSPCB
GO:0016829	lyase activity	molecular_function	0.140225	1	5	361	116	16315	HADHA,AMD1
GO:0005832	chaperonin-containing T-complex	cellular_component	0.140229	1	1	361	6	16315	CCT2
GO:0070577	histone acetyl-lysine binding	molecular_function	0.140293	1	1	361	6	16315	TRIM24
GO:0030119	AP-type membrane coat adaptor complex	cellular_component	0.140372	1	2	361	27	16315	AP5B1
GO:0034505	tooth mineralization	biological_process	0.140791	1	1	361	6	16315	COL3A1
GO:0008134	transcription factor binding	molecular_function	0.140945	1	9	361	255	16315	KLF2,KLF2,KLF2,KLF2,KLF2,ZFPM2,SNF8,DRAP1
GO:0004842	ubiquitin-protein ligase activity	molecular_function	0.141105	1	6	361	148	16315	RNF144B,RNF167,NEDD4L,KCTD13,MUL1,TRIM24
GO:0007160	cell-matrix adhesion	biological_process	0.141751	1	4	361	85	16315	COL3A1,BCAM
GO:0030163	protein catabolic process	biological_process	0.142369	1	12	361	360	16315	TRIM24
GO:0030507	spectrin binding	molecular_function	0.142738	1	1	361	6	16315	ANK1
GO:0002862	negative regulation of inflammatory response to antigenic stimulus	biological_process	0.14284	1	1	361	7	16315	PSMB4
GO:0007205	activation of protein kinase C activity by G-protein coupled receptor protein signaling pathway	biological_process	0.14344	1	2	361	29	16315	CISH,DGKZ
GO:0006950	response to stress	biological_process	0.143444	1	35	361	1264	16315	PRKRA,NR4A2,HSPCB
GO:0051393	alpha-actinin binding	molecular_function	0.143511	1	1	361	6	16315	DAG1
GO:0008360	regulation of cell shape	biological_process	0.144627	1	3	361	55	16315	MYL12B,SH3KBP1,CDC42EP2
GO:0060538	skeletal muscle organ development	biological_process	0.145256	1	5	361	122	16315	CNTFR
GO:0032695	negative regulation of interleukin-12 production	biological_process	0.146852	1	1	361	7	16315	THBS1,THBS1
GO:0031362	anchored to external side of plasma membrane	cellular_component	0.147202	1	1	361	7	16315	CD59
GO:0045947	negative regulation of translational initiation	biological_process	0.14783	1	1	361	7	16315	EIF4EBP1
GO:0005798	Golgi-associated vesicle	cellular_component	0.14831	1	2	361	29	16315	STK16
GO:0006412	translation	biological_process	0.148414	1	16	361	573	16315	ENSSSCG00000024398,ENSSSCG00000027441,RPL37,RPS29,RPL11,RPS23,ENSSSCG00000027168,MRPL12
GO:0048541	Peyer's patch development	biological_process	0.148748	1	1	361	7	16315	STAT5B
GO:0060612	adipose tissue development	biological_process	0.149024	1	1	361	7	16315	ARID5B
GO:0019789	SUMO ligase activity	molecular_function	0.149313	1	1	361	7	16315	MUL1
GO:0042535	positive regulation of tumor necrosis factor biosynthetic process	biological_process	0.149552	1	1	361	7	16315	THBS1,THBS1
GO:0000228	nuclear chromosome	cellular_component	0.149733	1	7	361	187	16315	PINX1
GO:0031274	positive regulation of pseudopodium assembly	biological_process	0.149957	1	1	361	7	16315	CDC42EP2
GO:0007259	JAK-STAT cascade	biological_process	0.150117	1	3	361	59	16315	STAT5B
GO:0006744	ubiquinone biosynthetic process	biological_process	0.150518	1	1	361	7	16315	COQ9
GO:0035497	cAMP response element binding	molecular_function	0.151085	1	1	361	7	16315	CREB,CREB,CREB,CREB,CREB,CREB
GO:2000036	regulation of stem cell maintenance	biological_process	0.151137	1	1	361	7	16315	SAV1
GO:0017080	sodium channel regulator activity	molecular_function	0.151924	1	1	361	7	16315	NEDD4L,NEDD4L
GO:0051225	spindle assembly	biological_process	0.152377	1	2	361	30	16315	TUBB2A,TUBB4B
GO:0042574	retinal metabolic process	biological_process	0.152524	1	1	361	7	16315	DHRS4
GO:0050729	positive regulation of inflammatory response	biological_process	0.152728	1	2	361	31	16315	STAT5B,SERPINE1
GO:0005041	low-density lipoprotein receptor activity	molecular_function	0.153183	1	1	361	7	16315	LRP10
GO:0045647	negative regulation of erythrocyte differentiation	biological_process	0.153372	1	1	361	7	16315	STAT5B
GO:0060972	left/right pattern formation	biological_process	0.153532	1	1	361	7	16315	DPCD
GO:0006750	glutathione biosynthetic process	biological_process	0.153789	1	1	361	7	16315	GSS
GO:0001553	luteinization	biological_process	0.154019	1	1	361	7	16315	STAT5B
GO:0009913	epidermal cell differentiation	biological_process	0.154075	1	3	361	59	16315	KLF2,KLF2,KLF2,KLF2,KLF2
GO:0032868	response to insulin stimulus	biological_process	0.154277	1	3	361	59	16315	HADHA
GO:0005542	folic acid binding	molecular_function	0.156054	1	1	361	7	16315	NP_001136139.1
GO:0042273	ribosomal large subunit biogenesis	biological_process	0.157632	1	1	361	9	16315	RPL11
GO:0070670	response to interleukin-4	biological_process	0.157892	1	1	361	7	16315	STAT5B
GO:0070189	kynurenine metabolic process	biological_process	0.157899	1	1	361	7	16315	CCBL1
GO:0034244	negative regulation of transcription elongation from RNA polymerase II promoter	biological_process	0.158011	1	1	361	7	16315	SUPT4H1
GO:0005819	spindle	cellular_component	0.158426	1	5	361	120	16315	PINX1
GO:0022625	cytosolic large ribosomal subunit	cellular_component	0.158492	1	2	361	39	16315	RPL37,RPL11
GO:0006413	translational initiation	biological_process	0.158772	1	3	361	60	16315	EIF4G2,EIF4A1
GO:0003148	outflow tract septum morphogenesis	biological_process	0.159178	1	1	361	7	16315	ZFPM2
GO:0043923	positive regulation by host of viral transcription	biological_process	0.159501	1	1	361	7	16315	TAF11
GO:0040014	regulation of multicellular organism growth	biological_process	0.159825	1	3	361	61	16315	STAT5B,APP,APP
GO:0090026	positive regulation of monocyte chemotaxis	biological_process	0.159901	1	1	361	8	16315	SERPINE1
GO:0043498	cell surface binding	molecular_function	0.159945	1	2	361	31	16315	MIF
GO:0031503	protein complex localization	biological_process	0.159971	1	1	361	7	16315	FKBP4
GO:0007379	segment specification	biological_process	0.160545	1	1	361	8	16315	MLLT3
GO:0006910	phagocytosis, recognition	biological_process	0.160682	1	1	361	7	16315	MFGE8
GO:0048738	cardiac muscle tissue development	biological_process	0.160796	1	4	361	91	16315	ZFPM2
GO:0047496	vesicle transport along microtubule	biological_process	0.161733	1	1	361	7	16315	NDEL1
GO:0016459	myosin complex	cellular_component	0.161815	1	3	361	58	16315	MYO18A,ENSSSCG00000027341
GO:0009055	electron carrier activity	molecular_function	0.161852	1	5	361	130	16315	DNAJC10,GLRX3,MT-CO1,HMOX2,TXNDC17
GO:0030132	clathrin coat of coated pit	cellular_component	0.161969	1	1	361	7	16315	AP2M1
GO:0043044	ATP-dependent chromatin remodeling	biological_process	0.162069	1	1	361	7	16315	CHD8
GO:0032366	intracellular sterol transport	biological_process	0.162101	1	1	361	7	16315	NPC2
GO:0032367	intracellular cholesterol transport	biological_process	0.162101	1	1	361	7	16315	NPC2
GO:0061028	establishment of endothelial barrier	biological_process	0.162247	1	1	361	7	16315	PDE4D
GO:0009086	methionine biosynthetic process	biological_process	0.162332	1	1	361	7	16315	MTR
GO:0032020	ISG15-protein conjugation	biological_process	0.162969	1	1	361	8	16315	UBE2L6
GO:0035253	ciliary rootlet	cellular_component	0.163022	1	1	361	7	16315	APP,APP
GO:0001726	ruffle	cellular_component	0.163899	1	3	361	58	16315	PODXL,TNFRSF12A,S100A6
GO:0046543	development of secondary female sexual characteristics	biological_process	0.164096	1	1	361	8	16315	STAT5B
GO:0045294	alpha-catenin binding	molecular_function	0.164609	1	1	361	7	16315	VCL,VCL
GO:0008201	heparin binding	molecular_function	0.164614	1	3	361	61	16315	THBS1,THBS1,APP,APP,LREAP1
GO:0035767	endothelial cell chemotaxis	biological_process	0.164869	1	1	361	8	16315	NR4A1
GO:0008286	insulin receptor signaling pathway	biological_process	0.165248	1	2	361	31	16315	EIF4EBP1,FOXO1A,FOXO1A
GO:0009615	response to virus	biological_process	0.165656	1	5	361	132	16315	NPC2,CLU,ODC1,CCDC130
GO:0007173	epidermal growth factor receptor signaling pathway	biological_process	0.167256	1	2	361	32	16315	EGF
GO:0051131	chaperone-mediated protein complex assembly	biological_process	0.167349	1	1	361	9	16315	CCT2
GO:0001530	lipopolysaccharide binding	molecular_function	0.167551	1	1	361	8	16315	PSMB4
GO:0006869	lipid transport	biological_process	0.169057	1	5	361	125	16315	LRP10
GO:0030141	stored secretory granule	cellular_component	0.169759	1	4	361	93	16315	POMC,ZP2,THBS1,THBS1
GO:0016616	oxidoreductase activity, acting on the CH-OH group of donors, NAD or NADP as acceptor	molecular_function	0.171021	1	4	361	92	16315	ENSSSCG00000005776,HADHA,LDHA
GO:0004602	glutathione peroxidase activity	molecular_function	0.172035	1	1	361	9	16315	GSTK1
GO:0043406	positive regulation of MAP kinase activity	biological_process	0.17209	1	4	361	92	16315	EGF
GO:0019773	proteasome core complex, alpha-subunit complex	cellular_component	0.17262	1	1	361	8	16315	PSMA2
GO:0007271	synaptic transmission, cholinergic	biological_process	0.173377	1	1	361	8	16315	RAPSN
GO:0030506	ankyrin binding	molecular_function	0.173833	1	1	361	8	16315	FLNC
GO:0006465	signal peptide processing	biological_process	0.174209	1	1	361	8	16315	SPCS3
GO:0035970	peptidyl-threonine dephosphorylation	biological_process	0.174565	1	1	361	8	16315	PPM1G
GO:0048407	platelet-derived growth factor binding	molecular_function	0.174909	1	1	361	8	16315	COL3A1
GO:0043032	positive regulation of macrophage activation	biological_process	0.17665	1	1	361	8	16315	THBS1,THBS1
GO:2000008	regulation of protein localization at cell surface	biological_process	0.176748	1	1	361	9	16315	EGF
GO:0021542	dentate gyrus development	biological_process	0.177659	1	1	361	9	16315	BTG2
GO:0043034	costamere	cellular_component	0.178375	1	1	361	8	16315	VCL,VCL
GO:0032785	negative regulation of transcription elongation, DNA-dependent	biological_process	0.179045	1	1	361	8	16315	SUPT4H1
GO:0048468	cell development	biological_process	0.180447	1	24	361	862	16315	ARID5B
GO:0019827	stem cell maintenance	biological_process	0.180859	1	3	361	65	16315	KLF2,KLF2,KLF2,KLF2,KLF2
GO:0006865	amino acid transport	biological_process	0.181344	1	3	361	62	16315	SLC7A8,SLC7A8
GO:0016460	myosin II complex	cellular_component	0.181389	1	1	361	8	16315	MYL12B
GO:0045665	negative regulation of neuron differentiation	biological_process	0.182561	1	2	361	35	16315	APP,APP,ZHX2
GO:0000118	histone deacetylase complex	cellular_component	0.183088	1	2	361	32	16315	NRIP1,CIR1
GO:0016322	neuron remodeling	biological_process	0.183189	1	1	361	8	16315	APP,APP
GO:0071356	cellular response to tumor necrosis factor	biological_process	0.183228	1	2	361	35	16315	ANKRD1
GO:0050435	beta-amyloid metabolic process	biological_process	0.18325	1	1	361	8	16315	BECN1
GO:0031091	platelet alpha granule	cellular_component	0.183319	1	1	361	8	16315	THBS1,THBS1
GO:0017166	vinculin binding	molecular_function	0.183486	1	1	361	8	16315	DAG1
GO:0016239	positive regulation of macroautophagy	biological_process	0.18407	1	1	361	8	16315	BECN1
GO:0006878	cellular copper ion homeostasis	biological_process	0.184221	1	1	361	9	16315	APP,APP
GO:0048011	nerve growth factor receptor signaling pathway	biological_process	0.184749	1	1	361	9	16315	UTP11L
GO:0006378	mRNA polyadenylation	biological_process	0.186041	1	1	361	9	16315	APP,APP
GO:0048565	digestive tract development	biological_process	0.187601	1	3	361	66	16315	COL3A1
GO:0030315	T-tubule	cellular_component	0.18783	1	1	361	8	16315	CACNA2D1
GO:0019861	flagellum	cellular_component	0.187921	1	2	361	34	16315	LDHA
GO:0030175	filopodium	cellular_component	0.188637	1	2	361	34	16315	PODXL,DAG1
GO:0046686	response to cadmium ion	biological_process	0.189201	1	1	361	9	16315	GSS
GO:0071260	cellular response to mechanical stimulus	biological_process	0.189892	1	2	361	33	16315	ANKRD1,FADD
GO:0000062	fatty-acyl-CoA binding	molecular_function	0.190222	1	1	361	9	16315	PECI
GO:0016846	carbon-sulfur lyase activity	molecular_function	0.190352	1	1	361	9	16315	CENPV
GO:0090344	negative regulation of cell aging	biological_process	0.191626	1	1	361	10	16315	MIF
GO:0043596	nuclear replication fork	cellular_component	0.191878	1	1	361	9	16315	PCNA
GO:0071944	cell periphery	cellular_component	0.192317	1	45	361	1693	16315	PECAM1
GO:0045727	positive regulation of translation	biological_process	0.1925	1	2	361	35	16315	THBS1,THBS1
GO:0005577	fibrinogen complex	cellular_component	0.192726	1	1	361	9	16315	THBS1,THBS1
GO:0016310	phosphorylation	biological_process	0.192953	1	32	361	1166	16315	PFKFB1,PDK4,ITPK1,ABL1,PRKAG1,PIK3C2B
GO:0060575	intestinal epithelial cell differentiation	biological_process	0.193049	1	1	361	9	16315	SAV1
GO:0032781	positive regulation of ATPase activity	biological_process	0.193187	1	1	361	9	16315	DNAJC10
GO:0015935	small ribosomal subunit	cellular_component	0.19319	1	2	361	45	16315	RPS29,RPS23
GO:0055008	cardiac muscle tissue morphogenesis	biological_process	0.194746	1	2	361	36	16315	ANKRD1
GO:0040037	negative regulation of fibroblast growth factor receptor signaling pathway	biological_process	0.195068	1	1	361	9	16315	THBS1,THBS1
GO:0008306	associative learning	biological_process	0.195107	1	2	361	35	16315	BTG2
GO:0007050	cell cycle arrest	biological_process	0.195611	1	6	361	170	16315	THBS1,THBS1,PPM1G
GO:0007004	telomere maintenance via telomerase	biological_process	0.195756	1	1	361	9	16315	PINX1
GO:0000981	sequence-specific DNA binding RNA polymerase II transcription factor activity	molecular_function	0.196249	1	5	361	136	16315	BHLHE41
GO:0060052	neurofilament cytoskeleton organization	biological_process	0.196376	1	1	361	9	16315	NDEL1
GO:0002544	chronic inflammatory response	biological_process	0.196437	1	1	361	10	16315	THBS1,THBS1
GO:0016605	PML body	cellular_component	0.196636	1	2	361	34	16315	ZMYM2,CDK9
GO:0050891	multicellular organismal water homeostasis	biological_process	0.196834	1	1	361	9	16315	AQP4
GO:0003743	translation initiation factor activity	molecular_function	0.196939	1	2	361	36	16315	EIF4G2,EIF4A1
GO:0002474	antigen processing and presentation of peptide antigen via MHC class I	biological_process	0.19734	1	1	361	10	16315	SLA-P1
GO:0030169	low-density lipoprotein particle binding	molecular_function	0.197497	1	1	361	9	16315	THBS1,THBS1
GO:0030529	ribonucleoprotein complex	cellular_component	0.197763	1	12	361	437	16315	RPL37,RPL11,RPS23
GO:0043491	protein kinase B signaling cascade	biological_process	0.197862	1	3	361	67	16315	PIK3C2B
GO:0034508	centromere complex assembly	biological_process	0.198476	1	1	361	9	16315	CENPV
GO:0001968	fibronectin binding	molecular_function	0.198831	1	1	361	9	16315	THBS1,THBS1
GO:0006103	2-oxoglutarate metabolic process	biological_process	0.198907	1	1	361	9	16315	STAT5B
GO:0090136	epithelial cell-cell adhesion	biological_process	0.199314	1	1	361	9	16315	VCL,VCL
GO:0032321	positive regulation of Rho GTPase activity	biological_process	0.200072	1	2	361	36	16315	CDC42EP2
GO:0045502	dynein binding	molecular_function	0.200706	1	1	361	9	16315	ENSSSCG00000004104
GO:0000155	two-component sensor activity	molecular_function	0.200739	1	1	361	9	16315	PDK4
GO:0004571	mannosyl-oligosaccharide 1,2-alpha-mannosidase activity	molecular_function	0.201292	1	1	361	9	16315	EDEM2
GO:0004176	ATP-dependent peptidase activity	molecular_function	0.202356	1	1	361	9	16315	LONRF1,LONRF1
GO:0070059	apoptosis in response to endoplasmic reticulum stress	biological_process	0.202638	1	1	361	10	16315	DNAJC10
GO:0001833	inner cell mass cell proliferation	biological_process	0.202824	1	1	361	9	16315	NDEL1
GO:0031122	cytoplasmic microtubule organization	biological_process	0.202897	1	1	361	9	16315	ENSSSCG00000004104
GO:0004879	ligand-dependent nuclear receptor activity	molecular_function	0.203469	1	2	361	35	16315	NR4A2,NR4A1
GO:0046982	protein heterodimerization activity	molecular_function	0.203699	1	6	361	172	16315	NR4A2,SUPT4H1,BHLHE41,ENSSSCG00000004104,NR4A1,ZHX2
GO:0043256	laminin complex	cellular_component	0.203908	1	1	361	9	16315	LAMB1
GO:0031647	regulation of protein stability	biological_process	0.203922	1	3	361	69	16315	TRIM24
GO:0007617	mating behavior	biological_process	0.204759	1	1	361	10	16315	APP,APP
GO:0001071	nucleic acid binding transcription factor activity	molecular_function	0.20492	1	19	361	707	16315	ZFPM2
GO:0030117	membrane coat	cellular_component	0.204977	1	3	361	64	16315	AP3S2
GO:0042613	MHC class II protein complex	cellular_component	0.205203	1	1	361	10	16315	SLA-DRA1
GO:0043085	positive regulation of catalytic activity	biological_process	0.205281	1	15	361	508	16315	NR4A2
GO:0001673	male germ cell nucleus	cellular_component	0.206489	1	1	361	11	16315	HSPA2
GO:0071542	dopaminergic neuron differentiation	biological_process	0.206907	1	1	361	10	16315	NR4A2
GO:0000266	mitochondrial fission	biological_process	0.207087	1	1	361	10	16315	MUL1
GO:0045773	positive regulation of axon extension	biological_process	0.207207	1	1	361	10	16315	TNFRSF12A
GO:0017069	snRNA binding	molecular_function	0.207801	1	1	361	10	16315	CDK9
GO:0007184	SMAD protein import into nucleus	biological_process	0.20825	1	1	361	10	16315	TOB1
GO:0007275	multicellular organismal development	biological_process	0.208255	1	56	361	2201	16315	ANGPTL4,ENSSSCG00000023784,MYF5
GO:0090279	regulation of calcium ion import	biological_process	0.209282	1	1	361	10	16315	EGF
GO:0001525	angiogenesis	biological_process	0.209554	1	7	361	211	16315	ANGPTL4,EDG1,SERPINE1,EGF
GO:0007080	mitotic metaphase plate congression	biological_process	0.209836	1	1	361	10	16315	PINX1
GO:0032435	negative regulation of proteasomal ubiquitin-dependent protein catabolic process	biological_process	0.209903	1	1	361	10	16315	HSPCB
GO:0031432	titin binding	molecular_function	0.210299	1	1	361	10	16315	ANKRD1
GO:0005759	mitochondrial matrix	cellular_component	0.210439	1	3	361	69	16315	HADHA,ALDH4A1
GO:0060053	neurofilament cytoskeleton	cellular_component	0.211492	1	1	361	10	16315	NDEL1
GO:0009314	response to radiation	biological_process	0.212449	1	6	361	174	16315	COL3A1
GO:0031011	Ino80 complex	cellular_component	0.212723	1	1	361	10	16315	ENSSSCG00000015242
GO:0032332	positive regulation of chondrocyte differentiation	biological_process	0.213735	1	1	361	11	16315	PKDCC
GO:0043274	phospholipase binding	molecular_function	0.214585	1	1	361	10	16315	SRSF3
GO:0032098	regulation of appetite	biological_process	0.214621	1	1	361	11	16315	POMC
GO:0015485	cholesterol binding	molecular_function	0.214858	1	1	361	11	16315	NPC2,NPC2
GO:0006511	ubiquitin-dependent protein catabolic process	biological_process	0.215996	1	8	361	241	16315	PSMA2,UBD,UBD
GO:0070064	proline-rich region binding	molecular_function	0.21604	1	1	361	10	16315	ABL1
GO:0031902	late endosome membrane	cellular_component	0.216156	1	1	361	10	16315	SLA-DRA1
GO:0017017	MAP kinase tyrosine/serine/threonine phosphatase activity	molecular_function	0.216184	1	1	361	13	16315	DUSP10
GO:0051019	mitogen-activated protein kinase binding	molecular_function	0.216342	1	1	361	10	16315	ABL1
GO:0003417	growth plate cartilage development	biological_process	0.216414	1	1	361	10	16315	THBS1,THBS1
GO:0032786	positive regulation of transcription elongation, DNA-dependent	biological_process	0.21646	1	1	361	10	16315	SUPT4H1
GO:0021940	positive regulation of cerebellar granule cell precursor proliferation	biological_process	0.21685	1	1	361	10	16315	EGF
GO:0042523	positive regulation of tyrosine phosphorylation of Stat5 protein	biological_process	0.217181	1	1	361	11	16315	PECAM1
GO:0003713	transcription coactivator activity	molecular_function	0.217413	1	5	361	140	16315	NRIP1,ABRA,ARID5B,TAF11
GO:0097067	cellular response to thyroid hormone stimulus	biological_process	0.21794	1	1	361	10	16315	KLF9
GO:0042104	positive regulation of activated T cell proliferation	biological_process	0.218503	1	1	361	10	16315	STAT5B
GO:0004673	protein histidine kinase activity	molecular_function	0.218595	1	1	361	10	16315	PDK4
GO:0016780	phosphotransferase activity, for other substituted phosphate groups	molecular_function	0.219358	1	1	361	10	16315	CDIPT
GO:0042803	protein homodimerization activity	molecular_function	0.22002	1	10	361	323	16315	PRKRA,OLFML2A,PLEKHB1,HSF2,BHLHE41,S100A6,CCBL1,NR4A1,ZHX2,GSS
GO:0032964	collagen biosynthetic process	biological_process	0.221129	1	1	361	11	16315	COL3A1
GO:0043393	regulation of protein binding	biological_process	0.221591	1	3	361	70	16315	APP,APP
GO:0050750	low-density lipoprotein particle receptor binding	molecular_function	0.222497	1	1	361	11	16315	LREAP1
GO:0070328	triglyceride homeostasis	biological_process	0.223146	1	1	361	12	16315	ANGPTL4
GO:0015101	organic cation transmembrane transporter activity	molecular_function	0.223557	1	1	361	10	16315	SLC7A8,SLC7A8
GO:0005771	multivesicular body	cellular_component	0.223644	1	1	361	11	16315	ZP2
GO:0051642	centrosome localization	biological_process	0.224326	1	1	361	10	16315	NDEL1
GO:0006402	mRNA catabolic process	biological_process	0.22469	1	2	361	39	16315	ZHX2
GO:0051287	NAD binding	molecular_function	0.22663	1	2	361	37	16315	ENSSSCG00000005776,NDUFV1
GO:0050921	positive regulation of chemotaxis	biological_process	0.227426	1	2	361	41	16315	THBS1,THBS1
GO:0031307	integral to mitochondrial outer membrane	cellular_component	0.227459	1	1	361	11	16315	MUL1
GO:0001975	response to amphetamine	biological_process	0.227617	1	1	361	11	16315	NR4A2
GO:0070265	necrotic cell death	biological_process	0.227873	1	1	361	11	16315	FADD
GO:0030511	positive regulation of transforming growth factor beta receptor signaling pathway	biological_process	0.22788	1	1	361	11	16315	THBS1,THBS1
GO:0007179	transforming growth factor beta receptor signaling pathway	biological_process	0.228674	1	3	361	72	16315	COL3A1
GO:0030301	cholesterol transport	biological_process	0.229429	1	2	361	40	16315	NPC2,NPC2
GO:0030027	lamellipodium	cellular_component	0.22977	1	3	361	68	16315	PODXL,DAG1,DGKZ
GO:0007616	long-term memory	biological_process	0.230989	1	1	361	11	16315	NTF4
GO:0000122	negative regulation of transcription from RNA polymerase II promoter	biological_process	0.231712	1	10	361	336	16315	NRIP1,KLF2,KLF2,KLF2,KLF2,KLF2,DNAJB5,ZFPM2,NFIL3,NFIL3,SUPT4H1,PER1,DRAP1,ZHX2,MOSPD1,MOSPD1
GO:0015450	P-P-bond-hydrolysis-driven protein transmembrane transporter activity	molecular_function	0.231961	1	1	361	11	16315	ENSSSCG00000023263
GO:0000790	nuclear chromatin	cellular_component	0.232731	1	4	361	106	16315	KLF2,KLF2,KLF2,KLF2,KLF2,CREB,CREB,CREB,CREB,CREB,CREB
GO:0005979	regulation of glycogen biosynthetic process	biological_process	0.232758	1	1	361	12	16315	PPP1R3F,PPP1R3F
GO:0007266	Rho protein signal transduction	biological_process	0.232799	1	5	361	138	16315	PECAM1
GO:0000980	RNA polymerase II distal enhancer sequence-specific DNA binding	molecular_function	0.233844	1	1	361	11	16315	CREB,CREB,CREB,CREB,CREB,CREB
GO:0032467	positive regulation of cytokinesis	biological_process	0.233992	1	1	361	11	16315	CENPV
GO:0042641	actomyosin	cellular_component	0.234033	1	2	361	38	16315	MYO18A
GO:0046965	retinoid X receptor binding	molecular_function	0.234088	1	1	361	11	16315	NRIP1
GO:0008353	RNA polymerase II carboxy-terminal domain kinase activity	molecular_function	0.234258	1	1	361	11	16315	CDK9
GO:0051592	response to calcium ion	biological_process	0.234916	1	2	361	38	16315	THBS1,THBS1
GO:0005665	DNA-directed RNA polymerase II, core complex	cellular_component	0.235017	1	1	361	13	16315	POLR2H
GO:0030154	cell differentiation	biological_process	0.23573	1	38	361	1481	16315	ANGPTL4,KLF2,KLF2,KLF2,KLF2,KLF2,MYF5
GO:0030325	adrenal gland development	biological_process	0.236146	1	1	361	12	16315	ARID5B
GO:0010181	FMN binding	molecular_function	0.236173	1	1	361	11	16315	NDUFV1
GO:0007265	Ras protein signal transduction	biological_process	0.236541	1	9	361	282	16315	RASGRP3
GO:0046329	negative regulation of JNK cascade	biological_process	0.236703	1	1	361	11	16315	DUSP10
GO:0006954	inflammatory response	biological_process	0.237164	1	6	361	187	16315	THBS1,THBS1,MIF
GO:0043198	dendritic shaft	cellular_component	0.238261	1	1	361	11	16315	APP
GO:0043531	ADP binding	molecular_function	0.239033	1	1	361	11	16315	PRKAG1
GO:0045954	positive regulation of natural killer cell mediated cytotoxicity	biological_process	0.240549	1	1	361	11	16315	STAT5B
GO:0000160	two-component signal transduction system (phosphorelay)	biological_process	0.240594	1	1	361	11	16315	PDK4
GO:0048821	erythrocyte development	biological_process	0.242943	1	1	361	13	16315	ANK1
GO:0035556	intracellular signal transduction	biological_process	0.24573	1	35	361	1320	16315	ASB5,RASGRP3,DGKZ
GO:0050821	protein stabilization	biological_process	0.246399	1	2	361	42	16315	CREB,CREB,CREB,CREB,CREB,CREB,CLU,CLU
GO:0022011	myelination in peripheral nervous system	biological_process	0.247315	1	1	361	12	16315	DAG1
GO:0030307	positive regulation of cell growth	biological_process	0.247675	1	2	361	42	16315	ACSL4
GO:0019897	extrinsic to plasma membrane	cellular_component	0.247939	1	2	361	41	16315	MFGE8
GO:0042056	chemoattractant activity	molecular_function	0.248193	1	1	361	14	16315	MIF
GO:0001077	RNA polymerase II core promoter proximal region sequence-specific DNA binding transcription factor activity involved in positive regulation of transcription	molecular_function	0.249853	1	2	361	44	16315	KLF2,KLF2,KLF2,KLF2,KLF2,NR4A1
GO:0006662	glycerol ether metabolic process	biological_process	0.249996	1	1	361	12	16315	DNAJC10
GO:0030137	COPI-coated vesicle	cellular_component	0.250306	1	1	361	12	16315	PACS1
GO:0007193	inhibition of adenylate cyclase activity by G-protein signaling pathway	biological_process	0.250405	1	1	361	14	16315	EDG1
GO:0005154	epidermal growth factor receptor binding	molecular_function	0.251238	1	1	361	12	16315	EGF
GO:0051291	protein heterooligomerization	biological_process	0.251341	1	1	361	12	16315	PCBD2
GO:0050731	positive regulation of peptidyl-tyrosine phosphorylation	biological_process	0.252579	1	3	361	78	16315	MIF
GO:0045071	negative regulation of viral genome replication	biological_process	0.253044	1	1	361	14	16315	SLPI
GO:0060039	pericardium development	biological_process	0.253102	1	1	361	12	16315	CCM2
GO:0017134	fibroblast growth factor binding	molecular_function	0.253363	1	1	361	13	16315	THBS1,THBS1
GO:2000178	negative regulation of neural precursor cell proliferation	biological_process	0.253934	1	1	361	13	16315	BTG2
GO:0005911	cell-cell junction	cellular_component	0.254976	1	6	361	183	16315	VCL,VCL,SGCA,AQP4
GO:0030104	water homeostasis	biological_process	0.255325	1	1	361	12	16315	AQP4
GO:0042176	regulation of protein catabolic process	biological_process	0.256388	1	4	361	110	16315	PSMD2
GO:2000379	positive regulation of reactive oxygen species metabolic process	biological_process	0.256538	1	1	361	13	16315	THBS1,THBS1
GO:0010718	positive regulation of epithelial to mesenchymal transition	biological_process	0.257088	1	1	361	13	16315	COL3A1
GO:0016998	cell wall macromolecule catabolic process	biological_process	0.258013	1	1	361	13	16315	LYSMD1
GO:0031571	mitotic cell cycle G1/S transition DNA damage checkpoint	biological_process	0.258077	1	1	361	13	16315	DGKZ
GO:0016922	ligand-dependent nuclear receptor binding	molecular_function	0.258171	1	1	361	12	16315	TRIM24
GO:0034504	protein localization to nucleus	biological_process	0.259985	1	5	361	147	16315	COL3A1
GO:0043576	regulation of respiratory gaseous exchange	biological_process	0.260066	1	1	361	14	16315	NR4A2
GO:0010800	positive regulation of peptidyl-threonine phosphorylation	biological_process	0.260336	1	1	361	12	16315	EGF
GO:0032355	response to estradiol stimulus	biological_process	0.260548	1	1	361	13	16315	STAT5B
GO:0060716	labyrinthine layer blood vessel development	biological_process	0.260581	1	1	361	13	16315	JUNB
GO:0051537	2 iron, 2 sulfur cluster binding	molecular_function	0.26122	1	1	361	13	16315	CISD3,CISD3
GO:0015695	organic cation transport	biological_process	0.261914	1	1	361	12	16315	SLC7A8,SLC7A8
GO:0070888	E-box binding	molecular_function	0.262343	1	1	361	14	16315	PER1
GO:0017015	regulation of transforming growth factor beta receptor signaling pathway	biological_process	0.263795	1	2	361	44	16315	C5ORF13
GO:0050714	positive regulation of protein secretion	biological_process	0.266219	1	2	361	44	16315	ANKRD1
GO:0006633	fatty acid biosynthetic process	biological_process	0.266402	1	3	361	78	16315	PRKAG1
GO:0008361	regulation of cell size	biological_process	0.268671	1	2	361	42	16315	CREB,CREB,CREB,CREB,CREB,CREB
GO:0002026	regulation of the force of heart contraction	biological_process	0.26881	1	1	361	13	16315	GLRX3
GO:0030728	ovulation	biological_process	0.269057	1	1	361	13	16315	NRIP1
GO:0001829	trophectodermal cell differentiation	biological_process	0.269634	1	1	361	14	16315	JUNB
GO:0008307	structural constituent of muscle	molecular_function	0.270848	1	1	361	14	16315	DAG1
GO:0046854	phosphatidylinositol phosphorylation	biological_process	0.271049	1	2	361	42	16315	SKIP,PIK3C2B
GO:0035924	cellular response to vascular endothelial growth factor stimulus	biological_process	0.272046	1	1	361	14	16315	NR4A1
GO:0009898	internal side of plasma membrane	cellular_component	0.272147	1	2	361	44	16315	ENSSSCG00000025941
GO:0042060	wound healing	biological_process	0.272398	1	5	361	149	16315	COL3A1,FNTB,PECAM1
GO:0043161	proteasomal ubiquitin-dependent protein catabolic process	biological_process	0.273036	1	4	361	113	16315	KCTD13
GO:0006833	water transport	biological_process	0.27327	1	1	361	14	16315	AQP4
GO:0016235	aggresome	cellular_component	0.273897	1	1	361	13	16315	UBD,UBD
GO:0001501	skeletal system development	biological_process	0.274637	1	7	361	236	16315	COL3A1
GO:0006913	nucleocytoplasmic transport	biological_process	0.274646	1	6	361	189	16315	MLXIP,AAAS
GO:0044267	cellular protein metabolic process	biological_process	0.275816	1	63	361	2556	16315	CCT2
GO:0043014	alpha-tubulin binding	molecular_function	0.276017	1	1	361	13	16315	NDEL1
GO:0000287	magnesium ion binding	molecular_function	0.276191	1	5	361	148	16315	ITPK1,KARS,ABL1,MATA2,GSS
GO:0045768	positive regulation of anti-apoptosis	biological_process	0.276481	1	1	361	14	16315	RNF144B
GO:0048037	cofactor binding	molecular_function	0.27651	1	7	361	219	16315	ENSSSCG00000005776,PHYH
GO:0009416	response to light stimulus	biological_process	0.277564	1	4	361	117	16315	PER1
GO:0033687	osteoblast proliferation	biological_process	0.278003	1	1	361	15	16315	JUNB
GO:0005100	Rho GTPase activator activity	molecular_function	0.278571	1	1	361	13	16315	CDC42EP2
GO:0003700	sequence-specific DNA binding transcription factor activity	molecular_function	0.278664	1	18	361	705	16315	KLF2,KLF2,KLF2,KLF2,KLF2,NR4A2,STAT5B,CSRNP1,ZNF628,MAFF,NFIL3,NFIL3,ATF3,CREB,CREB,CREB,CREB,CREB,CREB,HSF2,ENSSSCG00000010993,FOXO1A,FOXO1A,HOXD1,ETS2,NR4A1,JUNB,ZHX2
GO:0045595	regulation of cell differentiation	biological_process	0.279375	1	16	361	598	16315	KLF2,KLF2,KLF2,KLF2,KLF2
GO:0004864	protein phosphatase inhibitor activity	molecular_function	0.279564	1	1	361	15	16315	PPP1R1A
GO:0014044	Schwann cell development	biological_process	0.28069	1	1	361	14	16315	DAG1
GO:0007010	cytoskeleton organization	biological_process	0.280967	1	14	361	499	16315	SGCG,SH3KBP1
GO:0021952	central nervous system projection neuron axonogenesis	biological_process	0.281116	1	1	361	13	16315	NR4A2
GO:0021799	cerebral cortex radially oriented cell migration	biological_process	0.281657	1	1	361	15	16315	NDEL1
GO:0042474	middle ear morphogenesis	biological_process	0.282641	1	1	361	16	16315	PRKRA
GO:0051898	negative regulation of protein kinase B signaling cascade	biological_process	0.282975	1	1	361	14	16315	DAG1
GO:0070412	R-SMAD binding	molecular_function	0.283279	1	1	361	14	16315	ANKRD1
GO:0045604	regulation of epidermal cell differentiation	biological_process	0.283521	1	1	361	14	16315	MAFF
GO:0030424	axon	cellular_component	0.284768	1	4	361	113	16315	NDEL1,APP,APP,ENSSSCG00000004104
GO:0016298	lipase activity	molecular_function	0.287742	1	3	361	78	16315	LIPE
GO:0043297	apical junction assembly	biological_process	0.289502	1	1	361	14	16315	VCL,VCL
GO:0043536	positive regulation of blood vessel endothelial cell migration	biological_process	0.289801	1	1	361	14	16315	THBS1,THBS1
GO:0042974	retinoic acid receptor binding	molecular_function	0.290092	1	1	361	14	16315	NRIP1
GO:0050662	coenzyme binding	molecular_function	0.290952	1	5	361	149	16315	HADHA
GO:0007017	microtubule-based process	biological_process	0.291165	1	9	361	299	16315	TUBB2A,ENSSSCG00000016216,TUBA1B,TUBB4B
GO:0005921	gap junction	cellular_component	0.291456	1	1	361	18	16315	PANX2
GO:0007140	male meiosis	biological_process	0.292392	1	1	361	14	16315	HSPA2
GO:0030331	estrogen receptor binding	molecular_function	0.293736	1	1	361	15	16315	NRIP1
GO:0001676	long-chain fatty acid metabolic process	biological_process	0.29538	1	1	361	14	16315	ACSL4
GO:0005669	transcription factor TFIID complex	cellular_component	0.296697	1	1	361	15	16315	TAF11
GO:0045216	cell-cell junction organization	biological_process	0.297012	1	2	361	45	16315	CCM2
GO:0001191	RNA polymerase II transcription factor binding transcription factor activity involved in negative regulation of transcription	molecular_function	0.297429	1	1	361	15	16315	BHLHE41
GO:0045121	membrane raft	cellular_component	0.298015	1	3	361	79	16315	DAG1,SGCA,PECAM1
GO:0001779	natural killer cell differentiation	biological_process	0.298332	1	1	361	15	16315	STAT5B
GO:0060487	lung epithelial cell differentiation	biological_process	0.299034	1	1	361	16	16315	SAV1
GO:0071222	cellular response to lipopolysaccharide	biological_process	0.300317	1	2	361	48	16315	ANKRD1,SERPINE1
GO:0071277	cellular response to calcium ion	biological_process	0.300447	1	1	361	15	16315	JUNB
GO:0071560	cellular response to transforming growth factor beta stimulus	biological_process	0.301659	1	1	361	15	16315	ANKRD1
GO:0044344	cellular response to fibroblast growth factor stimulus	biological_process	0.302009	1	2	361	50	16315	NR4A1
GO:0042612	MHC class I protein complex	cellular_component	0.303	1	1	361	17	16315	SLA-P1
GO:0060445	branching involved in salivary gland morphogenesis	biological_process	0.30329	1	1	361	15	16315	DAG1
GO:0051646	mitochondrion localization	biological_process	0.306005	1	1	361	15	16315	MUL1
GO:0006779	porphyrin-containing compound biosynthetic process	biological_process	0.306397	1	1	361	15	16315	ANK1
GO:0043499	eukaryotic cell surface binding	molecular_function	0.306488	1	1	361	16	16315	THBS1,THBS1
GO:0004197	cysteine-type endopeptidase activity	molecular_function	0.306867	1	2	361	46	16315	ENSSSCG00000002452
GO:0045444	fat cell differentiation	biological_process	0.307638	1	3	361	86	16315	KLF2,KLF2,KLF2,KLF2,KLF2,ARID5B
GO:0007339	binding of sperm to zona pellucida	biological_process	0.309527	1	1	361	16	16315	ZP2
GO:0005874	microtubule	cellular_component	0.309772	1	5	361	152	16315	TUBB2A,ENSSSCG00000016216,CCT2,TUBA1B,TUBB4B
GO:0061077	chaperone-mediated protein folding	biological_process	0.309816	1	1	361	16	16315	CLU,CLU
GO:0045600	positive regulation of fat cell differentiation	biological_process	0.310323	1	1	361	17	16315	CREB,CREB,CREB,CREB,CREB,CREB
GO:0051539	4 iron, 4 sulfur cluster binding	molecular_function	0.311671	1	1	361	15	16315	NDUFV1
GO:0008544	epidermis development	biological_process	0.311789	1	5	361	161	16315	NTF4
GO:0060761	negative regulation of response to cytokine stimulus	biological_process	0.31264	1	1	361	16	16315	KLF2,KLF2,KLF2,KLF2,KLF2
GO:0001105	RNA polymerase II transcription coactivator activity	molecular_function	0.313491	1	1	361	18	16315	ANKRD1
GO:0005758	mitochondrial intermembrane space	cellular_component	0.313983	1	1	361	18	16315	NDUFA8
GO:0030324	lung development	biological_process	0.314014	1	4	361	123	16315	ZFPM2
GO:0007155	cell adhesion	biological_process	0.314604	1	14	361	508	16315	VCL,VCL,TNFRSF12A,THBS1,THBS1,BCAM,MFGE8,PCDH1,PECAM1
GO:0051353	positive regulation of oxidoreductase activity	biological_process	0.315706	1	1	361	17	16315	ABL1
GO:0016491	oxidoreductase activity	molecular_function	0.316415	1	18	361	688	16315	HADHA,ALDH18A1,MT-ND3,ACADVL,DHRS4,MT-CO1,ALDH4A1,LDHA
GO:0030900	forebrain development	biological_process	0.316533	1	6	361	200	16315	APP,APP
GO:0007409	axonogenesis	biological_process	0.316757	1	6	361	201	16315	CREB,CREB,CREB,CREB,CREB,CREB,APP,APP
GO:0035589	G-protein coupled purinergic nucleotide receptor signaling pathway	biological_process	0.318235	1	1	361	22	16315	P2RY11
GO:0045028	G-protein coupled purinergic nucleotide receptor activity	molecular_function	0.318235	1	1	361	22	16315	P2RY11
GO:0015629	actin cytoskeleton	cellular_component	0.318276	1	7	361	235	16315	VCL,VCL,PODXL,ABRA,NP_001038058.1
GO:0045840	positive regulation of mitosis	biological_process	0.319105	1	1	361	16	16315	EGF
GO:0005689	U12-type spliceosomal complex	cellular_component	0.320353	1	1	361	16	16315	SF3B2
GO:0006298	mismatch repair	biological_process	0.321713	1	1	361	16	16315	PCNA
GO:0005605	basal lamina	cellular_component	0.322126	1	1	361	16	16315	LAMB1
GO:0000786	nucleosome	cellular_component	0.324323	1	2	361	80	16315	HIST1H2BD,ENSSSCG00000001134
GO:0042417	dopamine metabolic process	biological_process	0.324333	1	1	361	16	16315	NR4A2
GO:0045214	sarcomere organization	biological_process	0.325343	1	1	361	17	16315	CMYA1
GO:0043425	bHLH transcription factor binding	molecular_function	0.32549	1	1	361	18	16315	BHLHE41
GO:0048608	reproductive structure development	biological_process	0.326691	1	5	361	165	16315	FKBP4
GO:0042127	regulation of cell proliferation	biological_process	0.327305	1	17	361	655	16315	KLF2,KLF2,KLF2,KLF2,KLF2,FOXO1A,FOXO1A,SERPINE1
GO:0006974	response to DNA damage stimulus	biological_process	0.327731	1	9	361	318	16315	OBFC2B,BTG2
GO:0005741	mitochondrial outer membrane	cellular_component	0.329463	1	2	361	50	16315	TOMM40
GO:0032496	response to lipopolysaccharide	biological_process	0.329713	1	3	361	89	16315	DUSP10
GO:0004198	calcium-dependent cysteine-type endopeptidase activity	molecular_function	0.330796	1	1	361	16	16315	CAPNS1
GO:0033554	cellular response to stress	biological_process	0.331942	1	16	361	599	16315	NR4A2
GO:0048487	beta-tubulin binding	molecular_function	0.333134	1	1	361	17	16315	NDEL1
GO:0071339	MLL1 complex	cellular_component	0.334796	1	1	361	17	16315	CHD8
GO:0023014	signal transduction via phosphorylation event	biological_process	0.337151	1	1	361	17	16315	PDK4
GO:0004364	glutathione transferase activity	molecular_function	0.337845	1	1	361	19	16315	GSTK1
GO:0000226	microtubule cytoskeleton organization	biological_process	0.33832	1	6	361	200	16315	NDEL1,TUBA1B
GO:0006952	defense response	biological_process	0.339652	1	11	361	422	16315	PBD-2
GO:0046966	thyroid hormone receptor binding	molecular_function	0.339865	1	1	361	17	16315	TAF11
GO:0005097	Rab GTPase activator activity	molecular_function	0.341238	1	2	361	49	16315	TBC1D1,TBC1D20
GO:0032851	positive regulation of Rab GTPase activity	biological_process	0.341238	1	2	361	49	16315	TBC1D1,TBC1D20
GO:0004857	enzyme inhibitor activity	molecular_function	0.341582	1	6	361	216	16315	ANGPTL4,DGKZ
GO:0033209	tumor necrosis factor-mediated signaling pathway	biological_process	0.341967	1	1	361	19	16315	TXNDC17
GO:0032760	positive regulation of tumor necrosis factor production	biological_process	0.342601	1	1	361	19	16315	FADD
GO:0050766	positive regulation of phagocytosis	biological_process	0.342924	1	1	361	18	16315	MFGE8
GO:0006275	regulation of DNA replication	biological_process	0.34305	1	2	361	53	16315	PCNA
GO:0006368	transcription elongation from RNA polymerase II promoter	biological_process	0.343099	1	1	361	18	16315	SUPT4H1
GO:0019722	calcium-mediated signaling	biological_process	0.343589	1	2	361	53	16315	P2RY11,RCAN1
GO:0003676	nucleic acid binding	molecular_function	0.343858	1	59	361	2517	16315	TRNAU1AP,MKRN2,MKRN2,ENSSSCG00000026113,CHD8,BAT4,BAT4,BAT4,KLF2,KLF2,KLF2,KLF2,KLF2,C9ORF23,KLF9,ZNF628,SF3B2,ZNF385A,ZFPM2,PINX1,OBFC2B,ENSSSCG00000010993,KARS,EWSR1,KLF6,MKRN1,ZNF385D,SRSF3,DDX46,ZC3H12C,EIF4A1
GO:0007257	activation of JUN kinase activity	biological_process	0.344295	1	1	361	17	16315	MUL1
GO:0008285	negative regulation of cell proliferation	biological_process	0.34479	1	8	361	286	16315	KLF2,KLF2,KLF2,KLF2,KLF2,CMYA1,BECN1,FNTB,TRIM24
GO:0004177	aminopeptidase activity	molecular_function	0.344987	1	1	361	17	16315	DNPEP
GO:0008584	male gonad development	biological_process	0.345039	1	2	361	55	16315	ARID5B
GO:0009306	protein secretion	biological_process	0.345222	1	3	361	90	16315	MON1A
GO:0003707	steroid hormone receptor activity	molecular_function	0.346092	1	2	361	52	16315	NR4A2,NR4A1
GO:0007420	brain development	biological_process	0.346322	1	8	361	292	16315	EDG1
GO:0031225	anchored to membrane	cellular_component	0.348599	1	1	361	18	16315	CD59
GO:0005164	tumor necrosis factor receptor binding	molecular_function	0.349194	1	1	361	20	16315	TNFSF10,TNFSF10
GO:0043388	positive regulation of DNA binding	biological_process	0.349397	1	1	361	20	16315	EGF
GO:0032313	regulation of Rab GTPase activity	biological_process	0.35036	1	2	361	50	16315	TBC1D1,TBC1D20
GO:0008203	cholesterol metabolic process	biological_process	0.350453	1	2	361	54	16315	LIPE,APP,APP
GO:0060749	mammary gland alveolus development	biological_process	0.351203	1	1	361	19	16315	EGF
GO:0030890	positive regulation of B cell proliferation	biological_process	0.352648	1	1	361	19	16315	MIF
GO:0045766	positive regulation of angiogenesis	biological_process	0.352897	1	2	361	55	16315	THBS1,THBS1,SERPINE1
GO:0043401	steroid hormone mediated signaling pathway	biological_process	0.353717	1	2	361	53	16315	NR4A2,NR4A1
GO:0003995	acyl-CoA dehydrogenase activity	molecular_function	0.354201	1	1	361	18	16315	ACADVL
GO:0016772	transferase activity, transferring phosphorus-containing groups	molecular_function	0.35609	1	23	361	887	16315	PKDCC,CDK9,ENSSSCG00000015586,STK24,ABL1,STK16,FN3K,NEK7,PIK3C2B
GO:0044325	ion channel binding	molecular_function	0.357369	1	1	361	19	16315	PACS1
GO:0009566	fertilization	biological_process	0.359497	1	2	361	54	16315	AAAS
GO:0043029	T cell homeostasis	biological_process	0.361269	1	1	361	19	16315	STAT5B
GO:0042169	SH2 domain binding	molecular_function	0.361443	1	1	361	18	16315	DAG1
GO:0021953	central nervous system neuron differentiation	biological_process	0.363067	1	3	361	95	16315	NR4A2
GO:0043666	regulation of phosphoprotein phosphatase activity	biological_process	0.365209	1	1	361	19	16315	RCAN1
GO:0051402	neuron apoptosis	biological_process	0.366296	1	3	361	94	16315	APP,APP
GO:0032720	negative regulation of tumor necrosis factor production	biological_process	0.366364	1	1	361	20	16315	POMC
GO:0000922	spindle pole	cellular_component	0.367945	1	2	361	53	16315	CEP85,ENSSSCG00000004104
GO:0048705	skeletal system morphogenesis	biological_process	0.36815	1	4	361	140	16315	PRKRA,CSRNP1,ARID5B
GO:0008308	voltage-gated anion channel activity	molecular_function	0.368547	1	1	361	19	16315	TOMM40
GO:0006508	proteolysis	biological_process	0.36945	1	19	361	741	16315	PSMA2,LONRF1,LONRF1,PSMB4,DNPEP,ATG4D,C1R,ADAMTS8,UQCRC1,ADAM15,ENSSSCG00000002452
GO:0006914	autophagy	biological_process	0.371718	1	2	361	53	16315	BECN1,ATG4D
GO:0006730	one-carbon metabolic process	biological_process	0.372311	1	1	361	20	16315	MATA2
GO:0035329	hippo signaling cascade	biological_process	0.372924	1	1	361	19	16315	SAV1
GO:0071901	negative regulation of protein serine/threonine kinase activity	biological_process	0.373203	1	2	361	57	16315	ABL1
GO:0043149	stress fiber assembly	biological_process	0.373556	1	1	361	20	16315	KCTD13
GO:0046889	positive regulation of lipid biosynthetic process	biological_process	0.374123	1	1	361	21	16315	CREB,CREB,CREB,CREB,CREB,CREB
GO:0031234	extrinsic to internal side of plasma membrane	cellular_component	0.374885	1	1	361	21	16315	S100A6
GO:0034446	substrate adhesion-dependent cell spreading	biological_process	0.378226	1	1	361	20	16315	LAMB1
GO:0030879	mammary gland development	biological_process	0.378796	1	3	361	94	16315	CREB,CREB,CREB,CREB,CREB,CREB
GO:0001937	negative regulation of endothelial cell proliferation	biological_process	0.379949	1	1	361	20	16315	THBS1,THBS1
GO:0010332	response to gamma radiation	biological_process	0.38015	1	1	361	21	16315	DCUN1D3
GO:0051056	regulation of small GTPase mediated signal transduction	biological_process	0.381046	1	8	361	284	16315	RASGRP3
GO:0008180	signalosome	cellular_component	0.381069	1	1	361	20	16315	HSPCB
GO:0000795	synaptonemal complex	cellular_component	0.382708	1	1	361	20	16315	HSPA2
GO:0032508	DNA duplex unwinding	biological_process	0.382878	1	1	361	20	16315	CHD8
GO:0006687	glycosphingolipid metabolic process	biological_process	0.388706	1	1	361	20	16315	CREB,CREB,CREB,CREB,CREB,CREB,CREB
GO:0030501	positive regulation of bone mineralization	biological_process	0.390063	1	1	361	21	16315	PKDCC
GO:0030433	ER-associated protein catabolic process	biological_process	0.390153	1	1	361	21	16315	DNAJC10
GO:0051924	regulation of calcium ion transport	biological_process	0.391535	1	2	361	57	16315	CACNA2D1
GO:0004715	non-membrane spanning protein tyrosine kinase activity	molecular_function	0.391848	1	1	361	20	16315	ABL1
GO:0045765	regulation of angiogenesis	biological_process	0.391976	1	3	361	99	16315	SERPINE1
GO:0051091	positive regulation of sequence-specific DNA binding transcription factor activity	biological_process	0.393872	1	3	361	96	16315	ABRA,ARID5B
GO:0060441	epithelial tube branching involved in lung morphogenesis	biological_process	0.394463	1	1	361	23	16315	DAG1
GO:0043524	negative regulation of neuron apoptosis	biological_process	0.400776	1	2	361	61	16315	NR4A2,CNTFR
GO:0000776	kinetochore	cellular_component	0.401532	1	2	361	56	16315	CENPV,PINX1
GO:0002011	morphogenesis of an epithelial sheet	biological_process	0.405425	1	1	361	22	16315	DAG1
GO:0030514	negative regulation of BMP signaling pathway	biological_process	0.406507	1	1	361	23	16315	TOB1
GO:0007040	lysosome organization	biological_process	0.407563	1	1	361	21	16315	BECN1
GO:0019048	virus-host interaction	biological_process	0.409864	1	1	361	23	16315	DAG1
GO:0071347	cellular response to interleukin-1	biological_process	0.411979	1	1	361	23	16315	ANKRD1
GO:0035690	cellular response to drug	biological_process	0.412565	1	1	361	22	16315	ANKRD1
GO:0031175	neuron projection development	biological_process	0.413092	1	8	361	305	16315	APP,APP,BTG2,LAMB1
GO:0033673	negative regulation of kinase activity	biological_process	0.413241	1	3	361	101	16315	PIK3IP1
GO:0005881	cytoplasmic microtubule	cellular_component	0.413261	1	1	361	22	16315	TUBA1B
GO:0000910	cytokinesis	biological_process	0.414968	1	2	361	60	16315	BECN1
GO:0051289	protein homotetramerization	biological_process	0.415639	1	1	361	23	16315	PCBD2
GO:0045668	negative regulation of osteoblast differentiation	biological_process	0.417162	1	1	361	25	16315	TOB1
GO:0005604	basement membrane	cellular_component	0.417347	1	2	361	59	16315	DAG1,LAMB1
GO:0055013	cardiac muscle cell development	biological_process	0.41814	1	1	361	23	16315	CMYA1
GO:0050803	regulation of synapse structure and activity	biological_process	0.418951	1	1	361	24	16315	APP,APP
GO:0004143	diacylglycerol kinase activity	molecular_function	0.419342	1	1	361	23	16315	DGKZ
GO:0000932	cytoplasmic mRNA processing body	cellular_component	0.420568	1	1	361	23	16315	CNOT1
GO:0009434	microtubule-based flagellum	cellular_component	0.420687	1	1	361	23	16315	GAS8
GO:0005625	soluble fraction	cellular_component	0.420939	1	2	361	62	16315	PITPNM2,PECAM1
GO:0048306	calcium-dependent protein binding	molecular_function	0.420945	1	1	361	23	16315	S100A6
GO:0043280	positive regulation of cysteine-type endopeptidase activity involved in apoptotic process	biological_process	0.421906	1	2	361	62	16315	TNFSF10
GO:0005794	Golgi apparatus	cellular_component	0.422003	1	13	361	517	16315	GAS8,PKDCC,GOLGA4,ZP2,TMEM115,GORASP1,DUSP10,APP,APP,B4GALT3,ZDHHC9
GO:0071230	cellular response to amino acid stimulus	biological_process	0.425286	1	1	361	24	16315	COL3A1
GO:0000060	protein import into nucleus, translocation	biological_process	0.425486	1	1	361	23	16315	ABRA
GO:0031668	cellular response to extracellular stimulus	biological_process	0.425926	1	3	361	101	16315	LDHA
GO:0030971	receptor tyrosine kinase binding	molecular_function	0.427204	1	1	361	23	16315	PCNA
GO:0030317	sperm motility	biological_process	0.427454	1	1	361	24	16315	DPCD
GO:0001578	microtubule bundle formation	biological_process	0.428545	1	1	361	24	16315	ENSSSCG00000004104
GO:0016023	cytoplasmic membrane-bounded vesicle	cellular_component	0.428699	1	8	361	305	16315	BECN1
GO:0042645	mitochondrial nucleoid	cellular_component	0.430089	1	1	361	24	16315	HADHA
GO:0031410	cytoplasmic vesicle	cellular_component	0.43094	1	9	361	346	16315	CLU,APP,APP
GO:0035235	ionotropic glutamate receptor signaling pathway	biological_process	0.431298	1	1	361	22	16315	APP,APP
GO:0006334	nucleosome assembly	biological_process	0.432163	1	2	361	92	16315	HIST1H2BD,ENSSSCG00000001134
GO:0008542	visual learning	biological_process	0.432312	1	1	361	24	16315	APP,APP
GO:0000186	activation of MAPKK activity	biological_process	0.433097	1	1	361	24	16315	EGF
GO:0018108	peptidyl-tyrosine phosphorylation	biological_process	0.434812	1	4	361	144	16315	ABL1,EGF
GO:0005643	nuclear pore	cellular_component	0.435246	1	1	361	24	16315	AAAS
GO:0016529	sarcoplasmic reticulum	cellular_component	0.4355	1	1	361	23	16315	CACNA2D1
GO:0050680	negative regulation of epithelial cell proliferation	biological_process	0.436514	1	2	361	64	16315	SAV1
GO:0004721	phosphoprotein phosphatase activity	molecular_function	0.438421	1	4	361	145	16315	PPM1G
GO:0030838	positive regulation of actin filament polymerization	biological_process	0.439123	1	1	361	25	16315	CDC42EP2
GO:0016192	vesicle-mediated transport	biological_process	0.440432	1	12	361	471	16315	VPS41,AP2M1,AP3S2
GO:0034453	microtubule anchoring	biological_process	0.441182	1	1	361	24	16315	DAG1
GO:0016779	nucleotidyltransferase activity	molecular_function	0.442467	1	3	361	106	16315	UGP2
GO:0003333	amino acid transmembrane transport	biological_process	0.443746	1	1	361	25	16315	SLC7A8,SLC7A8
GO:0030032	lamellipodium assembly	biological_process	0.445703	1	1	361	24	16315	VCL,VCL
GO:0003887	DNA-directed DNA polymerase activity	molecular_function	0.446002	1	1	361	24	16315	POLH
GO:0050918	positive chemotaxis	biological_process	0.448894	1	1	361	27	16315	MIF
GO:0015807	L-amino acid transport	biological_process	0.449228	1	1	361	25	16315	SLC7A8,SLC7A8
GO:0042476	odontogenesis	biological_process	0.453239	1	2	361	67	16315	LAMB1
GO:0005694	chromosome	cellular_component	0.453674	1	10	361	424	16315	HIST1H2BD,ENSSSCG00000001134
GO:0005912	adherens junction	cellular_component	0.453979	1	3	361	102	16315	VCL,VCL
GO:0006470	protein dephosphorylation	biological_process	0.456036	1	4	361	148	16315	ENSSSCG00000025941,DUSP10,PPM1G,DUSP26
GO:0031576	G2/M transition checkpoint	biological_process	0.456124	1	1	361	26	16315	OBFC2B
GO:0006635	fatty acid beta-oxidation	biological_process	0.457211	1	1	361	25	16315	HADHA
GO:0043197	dendritic spine	cellular_component	0.4611	1	1	361	26	16315	APP
GO:0046887	positive regulation of hormone secretion	biological_process	0.461437	1	1	361	27	16315	CREB,CREB,CREB,CREB,CREB,CREB
GO:0006509	membrane protein ectodomain proteolysis	biological_process	0.462225	1	1	361	27	16315	DAG1
GO:0007626	locomotory behavior	biological_process	0.463053	1	3	361	108	16315	APP,APP
GO:0050730	regulation of peptidyl-tyrosine phosphorylation	biological_process	0.463318	1	3	361	110	16315	EGF
GO:0006986	response to unfolded protein	biological_process	0.463868	1	1	361	28	16315	DNAJB5
GO:0043087	regulation of GTPase activity	biological_process	0.464538	1	5	361	183	16315	RASGRP3
GO:0030131	clathrin adaptor complex	cellular_component	0.464632	1	1	361	25	16315	AP2M1
GO:0010212	response to ionizing radiation	biological_process	0.465519	1	2	361	67	16315	OBFC2B
GO:0010595	positive regulation of endothelial cell migration	biological_process	0.467084	1	1	361	26	16315	THBS1,THBS1
GO:0010975	regulation of neuron projection development	biological_process	0.467733	1	3	361	107	16315	NDEL1
GO:0045445	myoblast differentiation	biological_process	0.469551	1	1	361	28	16315	LGALS1
GO:0006879	cellular iron ion homeostasis	biological_process	0.471372	1	1	361	32	16315	MON1A
GO:0005667	transcription factor complex	cellular_component	0.471654	1	5	361	196	16315	CREB,CREB,CREB,CREB,CREB,CREB,CREB,SNF8,ANKRD1,NR4A1
GO:0006888	ER to Golgi vesicle-mediated transport	biological_process	0.474806	1	1	361	27	16315	ANK1
GO:0005245	voltage-gated calcium channel activity	molecular_function	0.476693	1	1	361	26	16315	CACNA2D1
GO:0005509	calcium ion binding	molecular_function	0.47916	1	14	361	576	16315	MYL12B,STAT5B,CAPNS1,RASGRP3,THBS1,THBS1,EDEM2,S100A6,DAG1,C1R,ENSSSCG00000023287,EFHD2,SGCA,PCDH1,ENSSSCG00000025136,ENSSSCG00000025136
GO:0004722	protein serine/threonine phosphatase activity	molecular_function	0.479872	1	1	361	27	16315	PPM1G
GO:0035064	methylated histone residue binding	molecular_function	0.479995	1	1	361	28	16315	CHD8
GO:0031929	TOR signaling cascade	biological_process	0.480068	1	1	361	27	16315	EIF4EBP1
GO:0004114	3',5'-cyclic-nucleotide phosphodiesterase activity	molecular_function	0.482061	1	1	361	27	16315	PDE4D
GO:0017137	Rab GTPase binding	molecular_function	0.483014	1	1	361	26	16315	GAS8
GO:0005765	lysosomal membrane	cellular_component	0.484565	1	1	361	27	16315	SLA-DRA1
GO:0032436	positive regulation of proteasomal ubiquitin-dependent protein catabolic process	biological_process	0.485104	1	1	361	28	16315	CLU,CLU
GO:0030198	extracellular matrix organization	biological_process	0.485875	1	3	361	110	16315	OLFML2A,APP,APP
GO:0048566	embryonic digestive tract development	biological_process	0.488479	1	1	361	29	16315	PKDCC
GO:0033044	regulation of chromosome organization	biological_process	0.488818	1	2	361	71	16315	CENPV
GO:0007605	sensory perception of sound	biological_process	0.488972	1	2	361	70	16315	COL3A1,AQP4
GO:0008270	zinc ion binding	molecular_function	0.489942	1	37	361	1578	16315	MKRN2,MKRN2,ZNF259,ENSSSCG00000026113,ZMYM2,MTR,LONRF1,LONRF1,KLF2,KLF2,KLF2,KLF2,KLF2,NPLOC4,RNF144B,NR4A2,KLF9,ZNF628,ZNF385A,ZFPM2,RNF19A,RNF167,SUPT4H1,DNPEP,ENSSSCG00000010993,EWSR1,VPS41,S100A6,RPS29,NUP153,KLF6,MKRN1,ZNF385D,MUL1,ADAMTS8,ZC3H12C,TRIM24,ZHX2,DNAJA4,UQCRC1,RAPSN,ADAM15,ZDHHC9
GO:0030199	collagen fibril organization	biological_process	0.490269	1	1	361	28	16315	COL3A1
GO:0030145	manganese ion binding	molecular_function	0.490377	1	1	361	28	16315	ABL1
GO:0009987	cellular process	biological_process	0.490482	1	241	361	10970	16315	JUNB
GO:0001938	positive regulation of endothelial cell proliferation	biological_process	0.490716	1	1	361	31	16315	NR4A1
GO:0030055	cell-substrate junction	cellular_component	0.491725	1	2	361	68	16315	TNS1
GO:0015631	tubulin binding	molecular_function	0.494081	1	3	361	110	16315	DAG1
GO:0003678	DNA helicase activity	molecular_function	0.494762	1	1	361	28	16315	CHD8
GO:0042393	histone binding	molecular_function	0.495973	1	2	361	70	16315	CHD8
GO:0030036	actin cytoskeleton organization	biological_process	0.497232	1	6	361	244	16315	CMYA1,CDC42EP2,ABL1
GO:0051925	regulation of calcium ion transport via voltage-gated calcium channel activity	biological_process	0.497628	1	1	361	28	16315	CACNA2D1
GO:0009617	response to bacterium	biological_process	0.498236	1	4	361	163	16315	PBD-2
GO:0000082	G1/S transition of mitotic cell cycle	biological_process	0.498478	1	2	361	73	16315	EIF4EBP1
GO:0002020	protease binding	molecular_function	0.498797	1	1	361	30	16315	SERPINE1
GO:0048706	embryonic skeletal system development	biological_process	0.499251	1	2	361	80	16315	COL3A1,HOXD1
GO:0008144	drug binding	molecular_function	0.50064	1	1	361	28	16315	PDE4D
GO:0005525	GTP binding	molecular_function	0.50365	1	8	361	339	16315	GBP1,TUBB2A,ENSSSCG00000016216,TUBA1B,TUBB4B,SRPR,FKBP4,RRAD
GO:0006282	regulation of DNA repair	biological_process	0.50525	1	1	361	31	16315	CDK9
GO:0016773	phosphotransferase activity, alcohol group as acceptor	molecular_function	0.50661	1	17	361	702	16315	NDUFA10,PIK3C2B
GO:0005654	nucleoplasm	cellular_component	0.506905	1	14	361	586	16315	DAG1
GO:0010811	positive regulation of cell-substrate adhesion	biological_process	0.51063	1	1	361	30	16315	THBS1,THBS1
GO:0007044	cell-substrate junction assembly	biological_process	0.512226	1	1	361	29	16315	TNS1
GO:0009408	response to heat	biological_process	0.51273	1	1	361	30	16315	DNAJA4
GO:0001701	in utero embryonic development	biological_process	0.513207	1	6	361	247	16315	CHD8,MAFF,ZFPM2,CCM2,JUNB
GO:0048666	neuron development	biological_process	0.513466	1	9	361	379	16315	BECN1
GO:0009060	aerobic respiration	biological_process	0.515684	1	1	361	31	16315	MT-CO1
GO:0019233	sensory perception of pain	biological_process	0.517959	1	1	361	32	16315	FAM134B
GO:0031965	nuclear membrane	cellular_component	0.517965	1	2	361	72	16315	AAAS,NUP153
GO:0030054	cell junction	cellular_component	0.518166	1	8	361	329	16315	VCL,VCL,CMYA1,PECAM1
GO:0033138	positive regulation of peptidyl-serine phosphorylation	biological_process	0.518624	1	1	361	32	16315	MIF
GO:0046777	protein autophosphorylation	biological_process	0.519368	1	3	361	113	16315	STK24,STK16,TRIM24
GO:0008234	cysteine-type peptidase activity	molecular_function	0.519865	1	3	361	115	16315	ATG4D
GO:0008289	lipid binding	molecular_function	0.521215	1	12	361	497	16315	FABP3,GLTP
GO:0000724	double-strand break repair via homologous recombination	biological_process	0.521441	1	1	361	31	16315	OBFC2B
GO:0004867	serine-type endopeptidase inhibitor activity	molecular_function	0.521903	1	2	361	77	16315	APP,SERPINE1
GO:0021983	pituitary gland development	biological_process	0.522589	1	1	361	33	16315	CREB,CREB,CREB,CREB,CREB,CREB
GO:0003684	damaged DNA binding	molecular_function	0.522644	1	1	361	31	16315	POLH
GO:0035019	somatic stem cell maintenance	biological_process	0.523041	1	1	361	32	16315	ZHX2
GO:0048286	lung alveolus development	biological_process	0.524029	1	1	361	32	16315	PKDCC
GO:0016301	kinase activity	molecular_function	0.524066	1	18	361	755	16315	PFKFB1,PDK4,ITPK1,ABL1,PRKAG1,PIK3C2B
GO:0051247	positive regulation of protein metabolic process	biological_process	0.525211	1	11	361	472	16315	KLF2,KLF2,KLF2,KLF2,KLF2
GO:0000781	chromosome, telomeric region	cellular_component	0.526094	1	1	361	31	16315	PINX1
GO:0030178	negative regulation of Wnt receptor signaling pathway	biological_process	0.531841	1	2	361	79	16315	CHD8
GO:0008017	microtubule binding	molecular_function	0.532116	1	2	361	74	16315	NDEL1,ENSSSCG00000004104
GO:0019955	cytokine binding	molecular_function	0.535657	1	1	361	35	16315	CNTFR
GO:0030521	androgen receptor signaling pathway	biological_process	0.535693	1	1	361	32	16315	FKBP4
GO:0032088	negative regulation of NF-kappaB transcription factor activity	biological_process	0.536093	1	1	361	33	16315	KLF2,KLF2,KLF2,KLF2,KLF2
GO:0004222	metalloendopeptidase activity	molecular_function	0.53863	1	3	361	119	16315	ADAMTS8,UQCRC1,ADAM15
GO:0030316	osteoclast differentiation	biological_process	0.539885	1	1	361	33	16315	JUNB
GO:0008565	protein transporter activity	molecular_function	0.544236	1	2	361	75	16315	AP3S2
GO:0001666	response to hypoxia	biological_process	0.544782	1	2	361	77	16315	NR4A2,HMOX2
GO:0042632	cholesterol homeostasis	biological_process	0.545056	1	1	361	34	16315	NPC2
GO:0008283	cell proliferation	biological_process	0.54508	1	19	361	834	16315	MIF
GO:0050715	positive regulation of cytokine secretion	biological_process	0.546616	1	1	361	34	16315	MIF
GO:0070371	ERK1 and ERK2 cascade	biological_process	0.547403	1	2	361	81	16315	EGF
GO:0007399	nervous system development	biological_process	0.551201	1	19	361	841	16315	UTP11L,NR4A2
GO:0001725	stress fiber	cellular_component	0.552599	1	1	361	33	16315	MYL12B
GO:0003697	single-stranded DNA binding	molecular_function	0.555329	1	1	361	36	16315	OBFC2B
GO:0019218	regulation of steroid metabolic process	biological_process	0.556146	1	1	361	36	16315	STAT5B
GO:0005815	microtubule organizing center	cellular_component	0.556947	1	7	361	291	16315	RNF19A
GO:0005778	peroxisomal membrane	cellular_component	0.55895	1	1	361	34	16315	CNOT1
GO:0001934	positive regulation of protein phosphorylation	biological_process	0.559834	1	7	361	306	16315	HSPA2
GO:0016791	phosphatase activity	molecular_function	0.561308	1	5	361	215	16315	ENSSSCG00000025941,DUSP10,DUSP26
GO:0051259	protein oligomerization	biological_process	0.56169	1	4	361	174	16315	OLFM1
GO:0051219	phosphoprotein binding	molecular_function	0.565748	1	1	361	35	16315	FKBP4
GO:0050885	neuromuscular process controlling balance	biological_process	0.566886	1	1	361	35	16315	APP,APP
GO:0001890	placenta development	biological_process	0.56711	1	2	361	84	16315	HSPCB
GO:0003899	DNA-directed RNA polymerase activity	molecular_function	0.567596	1	1	361	38	16315	POLR1D,POLR1D
GO:0001933	negative regulation of protein phosphorylation	biological_process	0.572539	1	3	361	129	16315	DNAJC10
GO:0042391	regulation of membrane potential	biological_process	0.57337	1	3	361	128	16315	CMYA1
GO:0003705	sequence-specific distal enhancer binding RNA polymerase II transcription factor activity	molecular_function	0.573545	1	1	361	37	16315	BHLHE41
GO:0006939	smooth muscle contraction	biological_process	0.580684	1	1	361	37	16315	PDE4D
GO:0006661	phosphatidylinositol biosynthetic process	biological_process	0.583111	1	1	361	38	16315	CDIPT
GO:0044262	cellular carbohydrate metabolic process	biological_process	0.586605	1	3	361	132	16315	LDHA
GO:0060070	canonical Wnt receptor signaling pathway	biological_process	0.586964	1	3	361	132	16315	CHD8
GO:0030308	negative regulation of cell growth	biological_process	0.5877	1	2	361	86	16315	DCUN1D3,MUL1
GO:0051897	positive regulation of protein kinase B signaling cascade	biological_process	0.588762	1	1	361	38	16315	THBS1,THBS1
GO:0046872	metal ion binding	molecular_function	0.589527	1	63	361	2769	16315	MKRN2,MKRN2,COX5B,ENSSSCG00000026113,ENSSSCG00000029162,MTR,LONRF1,LONRF1,RNF144B,NR4A2,KLF9,RASGRP3,RNF19A,RNF167,PDE4D,ITPK1,DNPEP,VPS41,RPL37,MT-CO1,MKRN1,PITPNM2,MUL1,ADAMTS8,TRIM24,MATA2,PPM1G,DNAJA4,UQCRC1,RAPSN,ZDHHC9
GO:0008284	positive regulation of cell proliferation	biological_process	0.589735	1	8	361	370	16315	STAT5B,CNTFR,FNTB,EDG1,ODC1,EGF
GO:0090263	positive regulation of canonical Wnt receptor signaling pathway	biological_process	0.589928	1	1	361	38	16315	COL3A1
GO:0030182	neuron differentiation	biological_process	0.590847	1	11	361	499	16315	NR4A2
GO:0007507	heart development	biological_process	0.591139	1	6	361	266	16315	ZFPM2,CCM2,COL3A1
GO:0000413	protein peptidyl-prolyl isomerization	biological_process	0.591441	1	1	361	38	16315	FKBP15
GO:0003755	peptidyl-prolyl cis-trans isomerase activity	molecular_function	0.591441	1	1	361	38	16315	FKBP15
GO:0030863	cortical cytoskeleton	cellular_component	0.592449	1	1	361	38	16315	ANK1
GO:0042327	positive regulation of phosphorylation	biological_process	0.595259	1	7	361	316	16315	THBS1,THBS1,MIF,EGF
GO:0001649	osteoblast differentiation	biological_process	0.598982	1	2	361	90	16315	JUNB
GO:0007229	integrin-mediated signaling pathway	biological_process	0.604244	1	1	361	38	16315	COL3A1
GO:0016817	hydrolase activity, acting on acid anhydrides	molecular_function	0.606775	1	16	361	707	16315	CHD8
GO:0042490	mechanoreceptor differentiation	biological_process	0.610273	1	1	361	40	16315	NTF4
GO:0043588	skin development	biological_process	0.611033	1	1	361	40	16315	COL3A1
GO:0030414	peptidase inhibitor activity	molecular_function	0.613656	1	3	361	142	16315	SLPI
GO:0009749	response to glucose stimulus	biological_process	0.615623	1	1	361	41	16315	THBS1,THBS1
GO:0003725	double-stranded RNA binding	molecular_function	0.617196	1	1	361	39	16315	PRKRA
GO:0034976	response to endoplasmic reticulum stress	biological_process	0.621982	1	1	361	43	16315	DNAJC10
GO:0030850	prostate gland development	biological_process	0.623017	1	1	361	41	16315	FKBP4
GO:0045621	positive regulation of lymphocyte differentiation	biological_process	0.623574	1	1	361	41	16315	STAT5B
GO:0045597	positive regulation of cell differentiation	biological_process	0.626619	1	6	361	286	16315	JUNB
GO:0030856	regulation of epithelial cell differentiation	biological_process	0.627077	1	1	361	43	16315	STAT5B
GO:0030139	endocytic vesicle	cellular_component	0.627775	1	1	361	41	16315	PIK3C2B
GO:0006367	transcription initiation from RNA polymerase II promoter	biological_process	0.627989	1	1	361	41	16315	TAF11
GO:0006897	endocytosis	biological_process	0.629228	1	4	361	183	16315	APP,APP
GO:0031056	regulation of histone modification	biological_process	0.629232	1	1	361	43	16315	CDK9
GO:0008237	metallopeptidase activity	molecular_function	0.630231	1	4	361	180	16315	DNPEP,ADAMTS8
GO:0008287	protein serine/threonine phosphatase complex	cellular_component	0.631707	1	1	361	41	16315	PPM1G
GO:0017111	nucleoside-triphosphatase activity	molecular_function	0.632312	1	15	361	672	16315	ENSSSCG00000004104,SRPR,ABCF3
GO:0009952	anterior/posterior pattern specification	biological_process	0.634527	1	3	361	152	16315	MLLT3,BTG2
GO:0006096	glycolysis	biological_process	0.635688	1	1	361	45	16315	LDHA
GO:0046620	regulation of organ growth	biological_process	0.637024	1	1	361	42	16315	SAV1
GO:0043169	cation binding	molecular_function	0.637657	1	64	361	2851	16315	SLC3A2
GO:0006468	protein phosphorylation	biological_process	0.637828	1	22	361	994	16315	PRKRA,POLR2H,PKDCC,CDK9,PDK4,CREB,CREB,CREB,CREB,CREB,CREB,ENSSSCG00000015586,STK24,ABL1,STK16,APP,APP,NEK7,TRIM24
GO:0019903	protein phosphatase binding	molecular_function	0.639547	1	1	361	42	16315	PPP1R3F,PPP1R3F
GO:0001756	somitogenesis	biological_process	0.640374	1	1	361	45	16315	MYF5
GO:0017124	SH3 domain binding	molecular_function	0.644216	1	1	361	41	16315	ABL1
GO:0032526	response to retinoic acid	biological_process	0.644463	1	1	361	44	16315	KLF2,KLF2,KLF2,KLF2,KLF2
GO:0004175	endopeptidase activity	molecular_function	0.646296	1	8	361	380	16315	PSMA2,PSMB4
GO:0004725	protein tyrosine phosphatase activity	molecular_function	0.650826	1	2	361	94	16315	DUSP10,DUSP26
GO:0005813	centrosome	cellular_component	0.652082	1	6	361	274	16315	PODXL,DYNLRB1,NDEL1,CEP85,AAAS,ENSSSCG00000004104
GO:0035335	peptidyl-tyrosine dephosphorylation	biological_process	0.653071	1	2	361	94	16315	DUSP10,DUSP26
GO:0008094	DNA-dependent ATPase activity	molecular_function	0.655691	1	1	361	43	16315	CHD8
GO:0006919	activation of caspase activity	biological_process	0.663574	1	1	361	46	16315	MUL1
GO:0006820	anion transport	biological_process	0.665371	1	5	361	236	16315	TOMM40
GO:0055114	oxidation-reduction process	biological_process	0.666075	1	15	361	708	16315	ENSSSCG00000005776,HADHA,ALDH18A1,MT-ND3,ACADVL,DHRS4,MT-CO1,HMOX2,ALDH4A1,LDHA,NDUFV1
GO:0008013	beta-catenin binding	molecular_function	0.668246	1	1	361	45	16315	CHD8
GO:0046914	transition metal ion binding	molecular_function	0.670713	1	40	361	1836	16315	APP,APP
GO:0004553	hydrolase activity, hydrolyzing O-glycosyl compounds	molecular_function	0.674767	1	2	361	96	16315	GANC
GO:0030216	keratinocyte differentiation	biological_process	0.674823	1	1	361	48	16315	SAV1
GO:0016311	dephosphorylation	biological_process	0.676756	1	5	361	246	16315	ENSSSCG00000025941,DUSP10,DUSP26
GO:0008083	growth factor activity	molecular_function	0.679481	1	2	361	111	16315	NTF4,EGF
GO:0016811	hydrolase activity, acting on carbon-nitrogen (but not peptide) bonds, in linear amides	molecular_function	0.680214	1	1	361	47	16315	FAAH
GO:0008233	peptidase activity	molecular_function	0.68133	1	12	361	570	16315	PSMA2,PSMB4,DNPEP,ATG4D,C1R,ADAMTS8,SPCS3
GO:0006260	DNA replication	biological_process	0.681436	1	3	361	147	16315	PCNA
GO:0006839	mitochondrial transport	biological_process	0.684279	1	1	361	50	16315	SLC25A32
GO:0006418	tRNA aminoacylation for protein translation	biological_process	0.685953	1	1	361	48	16315	KARS
GO:0030594	neurotransmitter receptor activity	molecular_function	0.687308	1	1	361	55	16315	P2RY11
GO:0033077	T cell differentiation in thymus	biological_process	0.690178	1	1	361	51	16315	STAT5B
GO:0051092	positive regulation of NF-kappaB transcription factor activity	biological_process	0.692087	1	1	361	49	16315	CLU,CLU
GO:0016607	nuclear speck	cellular_component	0.692337	1	1	361	49	16315	SRSF3
GO:0050900	leukocyte migration	biological_process	0.693854	1	2	361	107	16315	PODXL
GO:0004386	helicase activity	molecular_function	0.698142	1	3	361	149	16315	CHD8,DDX46,EIF4A1
GO:0004812	aminoacyl-tRNA ligase activity	molecular_function	0.69833	1	1	361	50	16315	KARS
GO:0031625	ubiquitin protein ligase binding	molecular_function	0.701067	1	2	361	105	16315	PDE4D,CLU,CLU
GO:0008168	methyltransferase activity	molecular_function	0.70555	1	3	361	154	16315	ENSSSCG00000023680,ENSSSCG00000023680,METTL12
GO:0006281	DNA repair	biological_process	0.705657	1	4	361	203	16315	OBFC2B,POLH
GO:0070374	positive regulation of ERK1 and ERK2 cascade	biological_process	0.706215	1	1	361	55	16315	MIF
GO:0051607	defense response to virus	biological_process	0.707624	1	1	361	53	16315	FADD
GO:0007286	spermatid development	biological_process	0.708655	1	1	361	55	16315	HSPA2
GO:0008026	ATP-dependent helicase activity	molecular_function	0.714177	1	2	361	103	16315	DDX46,EIF4A1
GO:0007264	small GTPase mediated signal transduction	biological_process	0.718865	1	10	361	489	16315	RASGRP3,RRAD
GO:0005802	trans-Golgi network	cellular_component	0.719652	1	1	361	54	16315	BECN1
GO:0005126	cytokine receptor binding	molecular_function	0.721974	1	3	361	181	16315	MIF
GO:0016627	oxidoreductase activity, acting on the CH-CH group of donors	molecular_function	0.722916	1	1	361	53	16315	ACADVL
GO:0003824	catalytic activity	molecular_function	0.723312	1	112	361	5004	16315	PFKFB1,PFKFB1,ECH1,HADHA,PHYH,ALDH18A1,ACSM5,GANC,PECI,PDE4D,FNTB,C1R,PRKAG1,CCBL1,ODC1,SLC3A2,PPM1G,ACSL4,UQCRC1,LDHA
GO:0035091	phosphatidylinositol binding	molecular_function	0.728234	1	2	361	106	16315	PIK3C2B,SNX21,SNX21
GO:0008610	lipid biosynthetic process	biological_process	0.734305	1	5	361	264	16315	PRKAG1
GO:0030170	pyridoxal phosphate binding	molecular_function	0.736741	1	1	361	55	16315	CCBL1
GO:0090090	negative regulation of canonical Wnt receptor signaling pathway	biological_process	0.737851	1	1	361	58	16315	MLLT3
GO:0005524	ATP binding	molecular_function	0.740303	1	28	361	1291	16315	PFKFB1,PFKFB1,ENSSSCG00000024115,PKDCC,CHD8,CDK9,ENSSSCG00000027341,PDK4,ITPK1,HSPA2,ENSSSCG00000015586,KARS,STK24,CCT2,ABL1,STK16,HSPCB,PRKAG1,UBE2L6,ENSSSCG00000004104,NEK7,DDX46,NDUFA10,MATA2,EIF4A1,DNAJA4,ABCF3,FKBP4,GSS
GO:0047485	protein N-terminus binding	molecular_function	0.74654	1	1	361	57	16315	TAF11
GO:0055074	calcium ion homeostasis	biological_process	0.747771	1	2	361	114	16315	TRIM24
GO:0051048	negative regulation of secretion	biological_process	0.748922	1	1	361	61	16315	EGF
GO:0071013	catalytic step 2 spliceosome	cellular_component	0.752736	1	1	361	58	16315	SF3B2
GO:0048839	inner ear development	biological_process	0.754069	1	2	361	118	16315	CCM2,LRP10
GO:0005792	microsome	cellular_component	0.759314	1	1	361	59	16315	DNAJC10
GO:0005975	carbohydrate metabolic process	biological_process	0.760111	1	9	361	477	16315	GANC,SLC3A2,B4GALT3,LDHA
GO:0002819	regulation of adaptive immune response	biological_process	0.761255	1	1	361	61	16315	DUSP10
GO:0004896	cytokine receptor activity	molecular_function	0.764765	1	1	361	64	16315	CNTFR
GO:0005179	hormone activity	molecular_function	0.765065	1	1	361	78	16315	POMC
GO:0016853	isomerase activity	molecular_function	0.766356	1	2	361	118	16315	FKBP15,MIF
GO:0030234	enzyme regulator activity	molecular_function	0.768296	1	13	361	658	16315	PSMD2
GO:0030246	carbohydrate binding	molecular_function	0.769637	1	3	361	171	16315	GANC,LGALS1
GO:0006979	response to oxidative stress	biological_process	0.771668	1	2	361	120	16315	APP,APP
GO:0005764	lysosome	cellular_component	0.775186	1	2	361	121	16315	SLA-DRA1,NPC2
GO:0005925	focal adhesion	cellular_component	0.776159	1	1	361	61	16315	VCL,VCL
GO:0048754	branching morphogenesis of a tube	biological_process	0.777157	1	2	361	125	16315	EGF
GO:0003774	motor activity	molecular_function	0.777357	1	2	361	116	16315	MYO18A,ENSSSCG00000027341
GO:0016197	endosome transport	biological_process	0.77874	1	1	361	62	16315	AP5B1
GO:0005125	cytokine activity	molecular_function	0.780135	1	2	361	141	16315	MIF,TNFSF10,TNFSF10
GO:0008217	regulation of blood pressure	biological_process	0.783589	1	1	361	68	16315	POMC
GO:0005783	endoplasmic reticulum	cellular_component	0.784126	1	10	361	520	16315	NPC2,ZP2,DNAJC10,CLU,SSR4,SPCS3,LREAP1,AUP1
GO:0001822	kidney development	biological_process	0.796628	1	2	361	129	16315	ARID5B,ODC1
GO:0016323	basolateral plasma membrane	cellular_component	0.797184	1	1	361	66	16315	AQP4
GO:0043005	neuron projection	cellular_component	0.797728	1	4	361	228	16315	APP,APP
GO:0032259	methylation	biological_process	0.80072	1	3	361	179	16315	ENSSSCG00000023680,ENSSSCG00000023680,METTL12
GO:0003723	RNA binding	molecular_function	0.80766	1	8	361	448	16315	PRKRA,EIF4G2,RPL37,MIF4GD,IMP3
GO:0050660	flavin adenine dinucleotide binding	molecular_function	0.808629	1	1	361	67	16315	ACADVL
GO:0016358	dendrite development	biological_process	0.809398	1	1	361	70	16315	APP,APP
GO:0048015	phosphatidylinositol-mediated signaling	biological_process	0.813366	1	1	361	70	16315	PIK3C2B
GO:0048568	embryonic organ development	biological_process	0.81338	1	4	361	256	16315	ZFPM2
GO:0008654	phospholipid biosynthetic process	biological_process	0.814346	1	1	361	72	16315	CDIPT
GO:0007601	visual perception	biological_process	0.816638	1	1	361	73	16315	COL3A1
GO:0045177	apical part of cell	cellular_component	0.81887	1	2	361	129	16315	MYL12B,APP,APP
GO:0016887	ATPase activity	molecular_function	0.822174	1	6	361	336	16315	ENSSSCG00000004104,ABCF3
GO:0006200	ATP catabolic process	biological_process	0.829126	1	2	361	132	16315	ENSSSCG00000004104,ABCF3
GO:0016740	transferase activity	molecular_function	0.830539	1	33	361	1631	16315	CPT2,ALDH18A1,CDIPT,ABL1,CCBL1,MATA2,PIK3C2B
GO:0004672	protein kinase activity	molecular_function	0.831009	1	11	361	587	16315	POLR2H,PKDCC,CDK9,PDK4,ENSSSCG00000015586,STK24,ABL1,STK16,NEK7,TRIM24
GO:0001942	hair follicle development	biological_process	0.831304	1	1	361	76	16315	SAV1
GO:0000209	protein polyubiquitination	biological_process	0.841365	1	1	361	78	16315	RNF167
GO:0005882	intermediate filament	cellular_component	0.84156	1	1	361	84	16315	DES
GO:0007268	synaptic transmission	biological_process	0.841951	1	3	361	197	16315	P2RY11
GO:0006479	protein methylation	biological_process	0.84789	1	1	361	77	16315	BTG2
GO:0006810	transport	biological_process	0.849793	1	47	361	2298	16315	NP_001136139.1,SLC25A26,FABP3,ATG4D,SLC25A32,PITPNM2,AP2M1,SRPR,AQP4,AP3S2,SLC25A28
GO:0000166	nucleotide binding	molecular_function	0.850463	1	45	361	2173	16315	TRNAU1AP,ENSSSCG00000005776,HADHA,CDK9,TUBB2A,DHRS4,HSPA2,KARS,EWSR1,ENSSSCG00000016216,CCT2,ABL1,TUBA1B,PRKAG1,UBE2L6,ENSSSCG00000004104,TUBB4B,NEK7,SRPR,SRSF3,DDX46,MATA2,EIF4A1,ABCF3,LDHA,RRAD
GO:0006464	protein modification process	biological_process	0.853001	1	38	361	1877	16315	NEDD4L,NEDD4L
GO:0005681	spliceosomal complex	cellular_component	0.862103	1	1	361	82	16315	SF3B2
GO:0008081	phosphoric diester hydrolase activity	molecular_function	0.862806	1	1	361	82	16315	PDE4D
GO:0005088	Ras guanyl-nucleotide exchange factor activity	molecular_function	0.876094	1	1	361	83	16315	RASGRP3
GO:0042221	response to chemical stimulus	biological_process	0.877903	1	35	361	2253	16315	KLF2,KLF2,KLF2,KLF2,KLF2
GO:0019904	protein domain specific binding	molecular_function	0.882591	1	4	361	274	16315	ABL1,HOMER3
GO:0001664	G-protein coupled receptor binding	molecular_function	0.885378	1	1	361	105	16315	POMC
GO:0007283	spermatogenesis	biological_process	0.886175	1	2	361	163	16315	HSF2
GO:0006816	calcium ion transport	biological_process	0.890812	1	2	361	157	16315	CACNA2D1
GO:0005543	phospholipid binding	molecular_function	0.904145	1	6	361	382	16315	PLEKHB1,PHLDB1,PHLDB1
GO:0007156	homophilic cell adhesion	biological_process	0.907043	1	1	361	103	16315	PCDH1
GO:0016788	hydrolase activity, acting on ester bonds	molecular_function	0.909603	1	10	361	612	16315	IAH1
GO:0005624	membrane fraction	cellular_component	0.911757	1	2	361	170	16315	APP,PPP1R3F
GO:0007267	cell-cell signaling	biological_process	0.92159	1	5	361	365	16315	POMC
GO:0016746	transferase activity, transferring acyl groups	molecular_function	0.922509	1	2	361	178	16315	CPT2,AUP1
GO:0004713	protein tyrosine kinase activity	molecular_function	0.940125	1	1	361	114	16315	ABL1
GO:0019900	kinase binding	molecular_function	0.941718	1	3	361	256	16315	RASGRP3
GO:0016820	hydrolase activity, acting on acid anhydrides, catalyzing transmembrane movement of substances	molecular_function	0.944414	1	1	361	119	16315	ENSSSCG00000027344
GO:0016787	hydrolase activity	molecular_function	0.945242	1	40	361	2124	16315	PSMA2,PSMB4,PDE4D,LIPE,DNPEP,DUSP10,ATGL,ATG4D,C1R,IAH1,ADAMTS8,DDX46,EIF4A1,PPM1G,DUSP26
GO:0007165	signal transduction	biological_process	0.947607	1	68	361	3929	16315	ANGPTL4,P2RY11,POMC,ARRDC3,STAT5B,PDE4D,PDK4,LGALS1,EDG1,MUL1,PER1,ENSSSCG00000020940,FADD,SAV1,ANK1,PPP1R1A,RRAD
GO:0002009	morphogenesis of an epithelium	biological_process	0.951343	1	3	361	272	16315	VCL,VCL
GO:0045202	synapse	cellular_component	0.960277	1	2	361	205	16315	APP
GO:0020037	heme binding	molecular_function	0.960388	1	1	361	142	16315	MT-CO1
GO:0003682	chromatin binding	molecular_function	0.961031	1	2	361	216	16315	MKRN1,TRIM24
GO:0007154	cell communication	biological_process	0.962489	1	73	361	4218	16315	PIK3C2B,SNX21,SNX21
GO:0015267	channel activity	molecular_function	0.970618	1	4	361	365	16315	PANX2
GO:0005085	guanyl-nucleotide exchange factor activity	molecular_function	0.970627	1	1	361	142	16315	RASGRP3
GO:0004252	serine-type endopeptidase activity	molecular_function	0.970777	1	1	361	155	16315	C1R
GO:0004674	protein serine/threonine kinase activity	molecular_function	0.972855	1	4	361	354	16315	CDK9,STK24,STK16
GO:0019901	protein kinase binding	molecular_function	0.972973	1	2	361	230	16315	LIPE
GO:0015672	monovalent inorganic cation transport	biological_process	0.978516	1	2	361	255	16315	ANK1
GO:0005506	iron ion binding	molecular_function	0.983277	1	1	361	182	16315	MT-CO1
GO:0005215	transporter activity	molecular_function	0.983494	1	15	361	1035	16315	FABP3,AQP4
GO:0055085	transmembrane transport	biological_process	0.986493	1	9	361	714	16315	SLC25A26,SLC37A3,PANX2,TOMM40,AQP4
GO:0016020	membrane	cellular_component	0.992495	1	91	361	5305	16315	SLA-P1,NP_001136139.1,COX5B,SLA-DRA1,ENSSSCG00000023784,VCL,VCL,P2RY11,TIMM22,SLC25A26,SDF2,CNKSR3,MT-ND3,NDUFA11,SLC7A8,SLC7A8,CDC42EP2,CAPNS1,RNF19A,ENSSSCG00000003253,CNTFR,CDIPT,BCAM,EDEM2,MT-CO1,CUTA,SLC25A32,DAG1,CLU,TNFSF10,TNFSF10,PHB,SGCA,AQP4,PCDH1,PECAM1,SLC38A5,ANK1,CD59,SLC25A28,RRAD
GO:0005887	integral to plasma membrane	cellular_component	0.992767	1	2	361	294	16315	C9ORF46,SLC38A5
GO:0016757	transferase activity, transferring glycosyl groups	molecular_function	0.99733	1	1	361	261	16315	B4GALT3
GO:0007166	cell surface receptor linked signaling pathway	biological_process	0.999772	1	27	361	2543	16315	MIF
GO:0004871	signal transducer activity	molecular_function	1	1	10	361	1951	16315	P2RY11,STAT5B,LGALS1,EDG1,MUL1,PER1
GO:0016021	integral to membrane	cellular_component	1	1	32	361	3390	16315	FAM189A2,SLA-P1,SLA-DRA1,P2RY11,TIMM22,SLC25A26,SLC37A3,SGCG,MT-ND3,NDUFA11,SLC7A8,SLC7A8,PLEKHB1,RNF19A,ENSSSCG00000003253,MT-CO1,SLC25A32,DAG1,EDG1,LRP10,APP,APP,SSR4,SPCS3,AQP4,PCDH1,PECAM1,SLC38A5,SLC25A28
GO:0004872	receptor activity	molecular_function	1	1	9	361	1902	16315	ENSSSCG00000023784
GO:0004930	G-protein coupled receptor activity	molecular_function	1	1	2	361	1275	16315	P2RY11,EDG1
GO:0007186	G-protein coupled receptor signaling pathway	biological_process	1	1	4	361	1676	16315	P2RY11,EDG1
