# Supplementary material for: Comparison of differentially expressed genes in longissimus dorsi muscle of Diannan small ears, Wujin and landrace pigs using RNA-seq
Source: Front Vet Sci. 2024 Jan 5;10:1296208. doi: 10.3389/fvets.2023.1296208 (PMC10796741; doi:10.3389/fvets.2023.1296208)
Supplement: Supplementary file 9 [file Table_6.XLSX]

## Sheet: L6_L7_L12vsD54_D67_D74.GO_enric
Table S6. GO functional annotation of differentially expressed genes between LP and DSE
GO_accession	Description	Term_type	Over_represented_pValue	Corrected_pValue	DEG_item	DEG_list	Bg_item	Bg_list	Gene_names
GO:0030016	myofibril	cellular_component	2.69946e-10	2.7395e-06	14	278	86	16315	MYL1,ABRA,ANKRD1,TPM1
GO:0005515	protein binding	molecular_function	3.83093e-10	2.7395e-06	150	278	5731	16315	PFKFB1,FOS,OLFM1,PICK1,PTPN11,TRNAU1AP,HSD17B12,LYL1,SLC9A3R2,EIF4EBP1,COL4A2,ANXA2,ADORA1,UTP11L,EHD1,COL6A2,ZHX1,ARRDC3,MLXIP,CLIP1,CACNB1,TAB2,N4BP1,NXN,TXN,RDX,RNF144B,UBD,HR,STAT5B,SORBS1,PPP1CB,DNAJB5,PRR2,SNAP23,SH3KBP1,SLC7A8,SETD7,SPSB2,ZP2,TNS1,NFIL3,GAB1,DCUN1D1,ENSSSCG00000017381,TNFRSF12A,SERTAD1,TPM2,HFE2,ATF3,CREB,LIPE,HSPA2,DYRK1B,COL3A1,DUSP1,TP53INP1,FOXN3,EWSR1,LMF1,BMP4,ALB,SM…
GO:0044424	intracellular part	cellular_component	8.56569e-08	0.000204178	172	278	7446	16315	BGN
GO:0031674	I band	cellular_component	1.87625e-07	0.000335426	9	278	50	16315	ANKRD1
GO:0005737	cytoplasm	cellular_component	2.93852e-07	0.000420267	128	278	5099	16315	PICK1,PTPN11,SLC9A3R2,ANXA2,ANXA2,ADCY2,UTP11L,MURC,KCNN1,PPP1R14C,PMVK,HSPB3,CDKN2C,MLXIP,CLIP1,GPD1,AK1,TXN,RDX,EIF1AY,RNF144B,UBD,UBD,STAT5B,SORBS1,PPP1CB,ACADL,SH3KBP1,ENO3,GAB1,DDX3X,PNN,FAM213B,SLK,ALB,SMARCD3,ANKRD1,MAPK6,NFE2L2,DAG1,RCAN1,TXLNB,GPI,EEF1A,HIPK3,MTMR3,TECR,ZNF641,NR1H2,C5ORF13,PARK7,URM1,FBXO40,TRIM24,TPM1,ATF5,ZFP36L1,VIM,PKM2,NT5C3,ACSL4,MID1IP1,SMYD2,KLHDC8B,LDHA,DNAJC7,…
GO:0030018	Z disc	cellular_component	3.93143e-07	0.000468561	8	278	40	16315	MURC,MYL12B,IGFN1,MYL9,ITGB1BP2,NP_001038058.1,NP_001038059.1,PGM5
GO:0006641	triglyceride metabolic process	biological_process	1.16124e-06	0.0011072	7	278	33	16315	PTPN11,APOC3,SLC37A4,APOE
GO:0005622	intracellular	cellular_component	1.54945e-06	0.0013013	184	278	8426	16315	EHD1,ENSSSCG00000024253,ZHX1,TAB2,MLLT11,ASB5,PRPF39,ZFP91,SPSB2,ZNF511,EWSR1,RND3,ZNF641,ZNF641,ZNF641,ADCY9,ADPRHL1,TBC1D20,ZNF238,ZXDC
GO:0042383	sarcolemma	cellular_component	4.38566e-06	0.00257475	7	278	37	16315	ANXA2,ANXA2,COL6A2,DAG1,ENSSSCG00000010212,BGN,PGM5
GO:0009058	biosynthetic process	biological_process	5.19253e-06	0.00285629	86	278	3208	16315	FASN
GO:0043231	intracellular membrane-bounded organelle	cellular_component	6.15062e-06	0.00325801	132	278	5547	16315	DYRK1B,WDTC1
GO:0034382	chylomicron remnant clearance	biological_process	1.38421e-05	0.00618655	3	278	4	16315	APOC3,LMF1,APOE
GO:0046983	protein dimerization activity	molecular_function	1.83509e-05	0.00722052	23	278	490	16315	PRKRIR,NFIL3,NFIL3,ZBED6,ATF3,CREB,CREB,CREB,CREB,CREB,CREB,NFE2L2,JUNB,ATF5
GO:0006006	glucose metabolic process	biological_process	2.11124e-05	0.0077423	10	278	111	16315	WDTC1
GO:0006094	gluconeogenesis	biological_process	3.17071e-05	0.0100772	5	278	22	16315	GPD1,G3PD,ATF3,GPI
GO:0008203	cholesterol metabolic process	biological_process	3.87311e-05	0.0115402	7	278	54	16315	LIPE,APOC3,APOA1,APOE
GO:0045892	negative regulation of transcription, DNA-dependent	biological_process	4.1255e-05	0.0120414	24	278	559	16315	ZHX1,HR,ZBED6,ATF3,FOXN3,MYF5,BMP4,BHLHE40,CIR1,NR1H2,PER1,TRIM24,ZNF238,ZBTB16
GO:0045717	negative regulation of fatty acid biosynthetic process	biological_process	5.2164e-05	0.0140296	3	278	5	16315	ACADL,APOC3,WDTC1
GO:0006633	fatty acid biosynthetic process	biological_process	6.20579e-05	0.015387	8	278	78	16315	SCD
GO:0044444	cytoplasmic part	cellular_component	6.42243e-05	0.015387	89	278	3514	16315	ANKRD1
GO:0010629	negative regulation of gene expression	biological_process	6.62551e-05	0.0155341	25	278	614	16315	BMP4
GO:0006631	fatty acid metabolic process	biological_process	0.000110602	0.0225975	11	278	157	16315	STAT5B,ACADL,ACADM
GO:0044255	cellular lipid metabolic process	biological_process	0.000115944	0.0233555	20	278	442	16315	NR1H2
GO:0032870	cellular response to hormone stimulus	biological_process	0.000174017	0.0315038	11	278	167	16315	STAT5B,GHR
GO:0031012	extracellular matrix	cellular_component	0.00019243	0.033977	15	278	285	16315	HSD17B12,COL4A2,COL4A2,COL6A2,PCOLCE,ZP2,COL3A1,MFGE8,ADAMTS8,BGN,THBS2,MGP,ENSSSCG00000005381
GO:0006351	transcription, DNA-dependent	biological_process	0.00022981	0.0386676	53	278	1892	16315	COL4A2,TXN,NFIL3,NFIL3,RXRG,FOXN3,BHLHE41,SMARCD3,BHLHE40,TBX15,PPP1R10,PPP1R10,NR1H2,NR4A1,RORA
GO:0008202	steroid metabolic process	biological_process	0.000249883	0.0412807	9	278	120	16315	SLC37A4,APOA1
GO:0005975	carbohydrate metabolic process	biological_process	0.000251113	0.0412807	20	278	477	16315	GPD1,GANC,SLC3A2,LDHA,PGM5
GO:0042632	cholesterol homeostasis	biological_process	0.000279261	0.0437545	5	278	34	16315	EHD1,APOC3,SLC37A4,APOA1,APOE
GO:0033700	phospholipid efflux	biological_process	0.000291218	0.0438421	3	278	9	16315	APOC3,APOA1,APOE
GO:0005811	lipid particle	cellular_component	0.000299599	0.0441739	4	278	19	16315	ANXA2,EHD1,LIPE,ACSL4
GO:0016460	myosin II complex	cellular_component	0.00031004	0.0452469	3	278	8	16315	MYL12B,MYL9
GO:0019218	regulation of steroid metabolic process	biological_process	0.000341928	0.048109	5	278	36	16315	STAT5B
GO:0005634	nucleus	cellular_component	0.000345876	0.048109	84	278	3432	16315	FOS,TRNAU1AP,SLC9A3R2,UTP11L,ZHX1,HSPB3,CDKN2C,MLXIP,PRKRIR,NXN,TXN,IGFN1,UBD,UBD,STAT5B,SORBS1,DNAJB5,SNAP23,SH3KBP1,PRPF39,NFIL3,NFIL3,ZBED6,DDX3X,PNN,RXRG,ATF3,CREB,CREB,CREB,CREB,CREB,CREB,CREB,DYRK1B,TP53INP1,FOXN3,BHLHE41,EWSR1,MYF5,SMARCD3,ANKRD1,MAPK6,WDTC1,NFE2L2,BHLHE40,MLLT3,GHR,RCAN1,NMRAL1,CIR1,TBX15,GPI,PPP1R10,PPP1R10,SIAT7B,HIPK3,MTMR3,ZNF641,BMI1,NR1H2,PER1,DDX46,PARK7,FBXO40,NR4…
GO:0034361	very-low-density lipoprotein particle	cellular_component	0.000349484	0.048109	3	278	10	16315	APOC3,APOA1,APOE
GO:0006357	regulation of transcription from RNA polymerase II promoter	biological_process	0.000363579	0.049523	28	278	807	16315	STAT5B,ANKRD1,NR1H2,ATF5
GO:0010468	regulation of gene expression	biological_process	0.000377153	0.0499448	57	278	2117	16315	BMP4,BMI1,APOE
GO:0006366	transcription from RNA polymerase II promoter	biological_process	0.000390354	0.0507531	29	278	853	16315	BHLHE41,BHLHE40
GO:0045893	positive regulation of transcription, DNA-dependent	biological_process	0.000421407	0.0538122	25	278	691	16315	FOS,LYL1,MLLT11,ABRA,SERTAD1,CREB,CREB,CREB,CREB,CREB,CREB,DYRK1B,COL3A1,TP53INP1,MYF5,BMP4,SMARCD3,NFE2L2,NR4A1,TRIM24,ZXDC,ZBTB16
GO:0005886	plasma membrane	cellular_component	0.00043485	0.0550374	47	278	1621	16315	PICK1,SLC9A3R2,ADCY2,EHD1,SLA-DRA1,KCNN1,AK1,PLIN4,RDX,CMYA1,SORBS1,PRR2,SNAP23,SLC7A8,SLC7A8,ABRA,SLC16A3,ZP2,TNFRSF12A,HFE2,BCAM,SLK,NFE2L2,DAG1,GHR,HMOX2,SLA-DQA1,GPI,VIM,PKM2,HBEGF,ANK1,CD59,RILPL1
GO:0006119	oxidative phosphorylation	biological_process	0.000495611	0.0605831	4	278	23	16315	MT-CO1
GO:0006355	regulation of transcription, DNA-dependent	biological_process	0.000522094	0.0628672	50	278	1813	16315	FOS,LYL1,ZHX1,TXN,STAT5B,SETD7,RFX7,NFIL3,NFIL3,RXRG,ATF3,CREB,CREB,CREB,CREB,CREB,CREB,FOXN3,BHLHE41,MYF5,NFE2L2,BHLHE40,MLLT3,CREG1,TBX15,ZNF641,ZNF641,NR1H2,PER1,NR4A1,JUNB,RORA,ATF5,ZBTB16
GO:0072358	cardiovascular system development	biological_process	0.000552665	0.0637714	20	278	500	16315	NXN,APOE
GO:0032922	circadian regulation of gene expression	biological_process	0.000574411	0.0642775	3	278	10	16315	BHLHE41,BHLHE40,PER1
GO:0070653	high-density lipoprotein particle receptor binding	molecular_function	0.000576949	0.0642775	2	278	3	16315	APOC3,APOA1
GO:0071310	cellular response to organic substance	biological_process	0.000584259	0.0642775	21	278	546	16315	NR4A1
GO:0034363	intermediate-density lipoprotein particle	cellular_component	0.000599205	0.0650867	2	278	3	16315	APOC3,APOE
GO:0009893	positive regulation of metabolic process	biological_process	0.000604679	0.0650867	37	278	1218	16315	PIGY
GO:0010628	positive regulation of gene expression	biological_process	0.000645838	0.0679894	26	278	752	16315	NFIL3,NFIL3,BMP4,TRIM24
GO:0033344	cholesterol efflux	biological_process	0.000646522	0.0679894	4	278	24	16315	APOC3,APOA1,APOE
GO:0045833	negative regulation of lipid metabolic process	biological_process	0.000764831	0.0781166	4	278	25	16315	APOC3
GO:0008610	lipid biosynthetic process	biological_process	0.000777889	0.0783476	13	278	264	16315	SCD
GO:0016529	sarcoplasmic reticulum	cellular_component	0.000792542	0.0792653	4	278	23	16315	CACNB1,ENSSSCG00000027613,PLN
GO:0090181	regulation of cholesterol metabolic process	biological_process	0.000804708	0.0799231	3	278	11	16315	ACADL,LMF1
GO:0090207	regulation of triglyceride metabolic process	biological_process	0.000823967	0.0812716	3	278	12	16315	LMF1
GO:0009331	glycerol-3-phosphate dehydrogenase complex	cellular_component	0.000904708	0.0884843	2	278	3	16315	GPD1,G3PD
GO:0032488	Cdc42 protein signal transduction	biological_process	0.000909466	0.0884843	3	278	12	16315	APOC3,APOA1,APOE
GO:0006096	glycolysis	biological_process	0.00096156	0.0914267	5	278	45	16315	ENO3,PGK1,GPI,PKM2,LDHA
GO:0016491	oxidoreductase activity	molecular_function	0.000975086	0.0914267	24	278	688	16315	HSD17B12,HSD17B12,CYP4F55,MT-ND5,GPD1,G3PD,ACADL,ACADM,ENSSSCG00000020706,MT-CO1,CREG1,NADH4,ENSSSCG00000024109,SCD,ALDH4A1,LDHA
GO:0008152	metabolic process	biological_process	0.000979536	0.0914267	160	278	7716	16315	PFKFB1,PFKFB1,HSD17B12,HSD17B12,ACADL,HP,ACADM,ENSSSCG00000020706,LIPE,METTL12,ENSSSCG00000024109,ALDH4A1,ACSL4
GO:0018026	peptidyl-lysine monomethylation	biological_process	0.000985256	0.0914267	2	278	3	16315	SETD7,SMYD2
GO:0019254	carnitine metabolic process, CoA-linked	biological_process	0.000985522	0.0914267	2	278	3	16315	ACADL,ACADM
GO:0018027	peptidyl-lysine dimethylation	biological_process	0.000985861	0.0914267	2	278	3	16315	SETD7,SMYD2
GO:0005615	extracellular space	cellular_component	0.00102082	0.0924037	17	278	427	16315	OLFM1,UTP11L,COL6A2,CPXM1,PCOLCE,HFE2,COL3A1,APOC3,BMP4,ALB,MFGE8,DAG1,GHR,APOA1,APOE,HBEGF,PDGFC
GO:0034364	high-density lipoprotein particle	cellular_component	0.00109713	0.0974602	3	278	14	16315	APOA1,APOE
GO:0005201	extracellular matrix structural constituent	molecular_function	0.00114094	0.100727	4	278	26	16315	COL4A2,COL3A1,COL1A1,COL1A2
GO:0071229	cellular response to acid	biological_process	0.00115454	0.101302	4	278	27	16315	ANXA2,ANXA2,S100A10,S100A10,S100A10,S100A10
GO:0009755	hormone-mediated signaling pathway	biological_process	0.00128251	0.110794	6	278	70	16315	PTPN11
GO:0055088	lipid homeostasis	biological_process	0.00142617	0.119983	5	278	48	16315	APOE
GO:0008092	cytoskeletal protein binding	molecular_function	0.00145621	0.121027	16	278	382	16315	ANXA2,ANXA2,RDX
GO:0043565	sequence-specific DNA binding	molecular_function	0.00147043	0.121027	19	278	528	16315	ZHX1,NFIL3,NFIL3,RXRG,ATF3,CREB,CREB,CREB,CREB,CREB,CREB,FOXN3,NFE2L2,BMI1,NR1H2,NR4A1,JUNB,TRIM24,RORA,ATF5,ZNF238
GO:0005200	structural constituent of cytoskeleton	molecular_function	0.00154807	0.125088	3	278	14	16315	ENSSSCG00000010212,SYNM,VIM
GO:0060537	muscle tissue development	biological_process	0.00156189	0.125495	11	278	216	16315	SRPK3
GO:0008307	structural constituent of muscle	molecular_function	0.00157874	0.125573	3	278	14	16315	NEXN,DAG1,SYNM
GO:0000977	RNA polymerase II regulatory region sequence-specific DNA binding	molecular_function	0.00163084	0.127764	5	278	50	16315	NFIL3,NFIL3
GO:0034097	response to cytokine stimulus	biological_process	0.00163479	0.127764	11	278	222	16315	DDOST,COL3A1
GO:0010033	response to organic substance	biological_process	0.00165609	0.128725	26	278	802	16315	CREB,CREB,CREB,CREB,CREB,CREB
GO:0005576	extracellular region	cellular_component	0.0017798	0.136121	29	278	956	16315	COL6A2,CXCL12,TXN,HP,PCOLCE,ZP2,APOC3,BMP4,ALB,APOA1,ADAMTS8,B2M,B2M,APOE,PBD-2,HBEGF,THBS2,PDGFC,MGP
GO:0016651	oxidoreductase activity, acting on NADH or NADPH	molecular_function	0.00181377	0.13697	5	278	52	16315	MT-ND4L
GO:0004864	protein phosphatase inhibitor activity	molecular_function	0.00181962	0.13697	3	278	15	16315	PPP1R10,PPP1R10,PPP1R1A
GO:0019915	lipid storage	biological_process	0.00190631	0.142	4	278	31	16315	STAT5B,APOA1
GO:0033539	fatty acid beta-oxidation using acyl-CoA dehydrogenase	biological_process	0.00195478	0.144856	2	278	4	16315	ACADL,ACADM
GO:0032369	negative regulation of lipid transport	biological_process	0.00201261	0.147979	3	278	15	16315	NR1H2
GO:0001191	RNA polymerase II transcription factor binding transcription factor activity involved in negative regulation of transcription	molecular_function	0.0020965	0.152204	3	278	15	16315	BHLHE41,BHLHE40
GO:0070508	cholesterol import	biological_process	0.00231299	0.161368	2	278	5	16315	APOA1
GO:0043401	steroid hormone mediated signaling pathway	biological_process	0.00235898	0.163777	5	278	53	16315	RXRG,BMP4,NR1H2,NR4A1,RORA
GO:0005581	collagen	cellular_component	0.00249814	0.172601	5	278	54	16315	COL4A2,COL6A2,COL3A1,COL1A1,COL1A2
GO:0060136	embryonic process involved in female pregnancy	biological_process	0.00257151	0.176021	2	278	5	16315	JUNB,ACSL4
GO:0022900	electron transport chain	biological_process	0.00263054	0.179152	5	278	59	16315	MT-ND5,TXN,MT-CO1,NADH4
GO:0001725	stress fiber	cellular_component	0.00273609	0.183843	4	278	33	16315	MYL12B,SORBS1,MYL9,PGM5
GO:0048002	antigen processing and presentation of peptide antigen	biological_process	0.00280494	0.18402	3	278	17	16315	SLA-DQA1
GO:0042773	ATP synthesis coupled electron transport	biological_process	0.00286825	0.187314	3	278	18	16315	MT-ND5,NADH4,MT-ND4L
GO:0006605	protein targeting	biological_process	0.00292259	0.18905	11	278	235	16315	PICK1
GO:0042627	chylomicron	cellular_component	0.00293019	0.18905	2	278	6	16315	APOC3,APOE
GO:0043426	MRF binding	molecular_function	0.00293965	0.18905	2	278	5	16315	BHLHE41,BHLHE40
GO:0034366	spherical high-density lipoprotein particle	cellular_component	0.00314005	0.199596	2	278	6	16315	APOC3,APOA1
GO:0034380	high-density lipoprotein particle assembly	biological_process	0.00323986	0.205029	2	278	6	16315	APOA1,APOE
GO:0006629	lipid metabolic process	biological_process	0.00331009	0.20855	21	278	620	16315	PTPN11,ACADL,ACADM,APOA1,TECR,APOE,SCD,ACSL4
GO:0004879	ligand-dependent nuclear receptor activity	molecular_function	0.00334274	0.209204	4	278	35	16315	NR1H2,NR4A1,RORA
GO:0019433	triglyceride catabolic process	biological_process	0.00339916	0.209204	2	278	6	16315	LIPE,APOC3
GO:0014704	intercalated disc	cellular_component	0.00341112	0.209204	3	278	17	16315	CMYA1,MYH1,PGM5
GO:0034447	very-low-density lipoprotein particle clearance	biological_process	0.00344907	0.209909	2	278	6	16315	APOE
GO:0006695	cholesterol biosynthetic process	biological_process	0.00366497	0.219316	3	278	18	16315	PMVK,APOA1
GO:0003139	secondary heart field specification	biological_process	0.00368832	0.219793	2	278	6	16315	BMP4,SMARCD3
GO:0007623	circadian rhythm	biological_process	0.00374611	0.221392	4	278	37	16315	NFIL3,NFIL3,BHLHE41,BHLHE40
GO:0004857	enzyme inhibitor activity	molecular_function	0.00390787	0.230002	10	278	216	16315	WDTC1
GO:0040014	regulation of multicellular organism growth	biological_process	0.00403418	0.23454	5	278	61	16315	PTPN11,STAT5B
GO:0006886	intracellular protein transport	biological_process	0.00411957	0.238123	15	278	390	16315	EHD1,ZP2,STX16,STX16,STX16,STX16,STX16
GO:0002039	p53 binding	molecular_function	0.00413427	0.238123	4	278	37	16315	SETD7,ANKRD1,TRIM24,SMYD2
GO:0010875	positive regulation of cholesterol efflux	biological_process	0.00414577	0.238123	2	278	6	16315	NR1H2,APOE
GO:0006072	glycerol-3-phosphate metabolic process	biological_process	0.00419779	0.239399	2	278	6	16315	GPD1,G3PD
GO:0008201	heparin binding	molecular_function	0.00420145	0.239399	5	278	61	16315	HSD17B12,PCOLCE,BMP4,APOE,HBEGF
GO:0010944	negative regulation of transcription by competitive promoter binding	biological_process	0.00444135	0.25008	2	278	6	16315	CREB,CREB,CREB,CREB,CREB,CREB,BHLHE41
GO:0060396	growth hormone receptor signaling pathway	biological_process	0.00464381	0.257184	2	278	6	16315	GHR
GO:0034384	high-density lipoprotein particle clearance	biological_process	0.00468182	0.257184	2	278	7	16315	APOE
GO:0009437	carnitine metabolic process	biological_process	0.00475484	0.258569	2	278	6	16315	ACADM
GO:0030301	cholesterol transport	biological_process	0.00485243	0.261885	4	278	40	16315	APOA1
GO:0005539	glycosaminoglycan binding	molecular_function	0.00489417	0.262159	6	278	89	16315	BGN
GO:0019898	extrinsic to membrane	cellular_component	0.00495159	0.264245	5	278	62	16315	RDX,GHR
GO:0001078	RNA polymerase II core promoter proximal region sequence-specific DNA binding transcription factor activity involved in negative regulation of transcription	molecular_function	0.00511476	0.267953	3	278	21	16315	NFIL3,NFIL3,BHLHE41,BHLHE40
GO:0046889	positive regulation of lipid biosynthetic process	biological_process	0.00513436	0.267999	3	278	21	16315	CREB,CREB,CREB,CREB,CREB,CREB
GO:0055102	lipase inhibitor activity	molecular_function	0.005351	0.276829	2	278	7	16315	APOC3
GO:0048738	cardiac muscle tissue development	biological_process	0.00536161	0.276829	6	278	91	16315	PLN
GO:0051006	positive regulation of lipoprotein lipase activity	biological_process	0.005399	0.277757	2	278	7	16315	LMF1,NR1H2
GO:0016126	sterol biosynthetic process	biological_process	0.00572129	0.293283	3	278	21	16315	PMVK
GO:0000122	negative regulation of transcription from RNA polymerase II promoter	biological_process	0.00575671	0.29364	13	278	336	16315	ZHX1,TXN,DNAJB5,NFIL3,NFIL3,ZBED6,WDTC1,BHLHE40,TBX15,BMI1,PER1,MXI1,ZNF238,SMYD2
GO:0000976	transcription regulatory region sequence-specific DNA binding	molecular_function	0.00602677	0.301381	6	278	97	16315	TBX15
GO:0043065	positive regulation of apoptosis	biological_process	0.00629906	0.311604	11	278	262	16315	UBD,UBD,MLLT11,BMP4,ANKRD1,ZBTB16
GO:0003779	actin binding	molecular_function	0.00630131	0.311604	9	278	187	16315	LMOD3,CMYA1,ABRA,TPM2,ANKRD1,DAG1,NP_001038058.1,CNN1
GO:0008253	5'-nucleotidase activity	molecular_function	0.00633222	0.311604	2	278	7	16315	NT5M,NT5C3
GO:0055114	oxidation-reduction process	biological_process	0.00644092	0.315473	22	278	708	16315	HSD17B12,HSD17B12,FASN,NNT,CYP4F55,MT-ND5,GPD1,TXN,G3PD,ACADL,ACADM,ENSSSCG00000020706,MT-CO1,CREG1,HMOX2,NADH4,MT-ND4L,ENSSSCG00000024109,SCD,ALDH4A1,LDHA
GO:0045723	positive regulation of fatty acid biosynthetic process	biological_process	0.00686587	0.329826	2	278	8	16315	NR1H2,MID1IP1
GO:0007517	muscle organ development	biological_process	0.00694818	0.331243	9	278	194	16315	MYF5
GO:0001102	RNA polymerase II activating transcription factor binding	molecular_function	0.00699577	0.332404	3	278	23	16315	CREB,CREB,CREB,CREB,CREB,CREB,BHLHE41,BHLHE40
GO:0061036	positive regulation of cartilage development	biological_process	0.00720739	0.340198	2	278	8	16315	BMP4,ZBTB16
GO:0009986	cell surface	cellular_component	0.00726571	0.341823	12	278	301	16315	PRR2,ENO3,TNFRSF12A,HFE2,HSPA2,BCAM,GHR,HBEGF,CD59
GO:0010942	positive regulation of cell death	biological_process	0.00777095	0.361968	11	278	270	16315	BMP4
GO:0032376	positive regulation of cholesterol transport	biological_process	0.00782046	0.361968	2	278	8	16315	NR1H2
GO:0009888	tissue development	biological_process	0.00786436	0.362826	24	278	810	16315	BMP4
GO:0016477	cell migration	biological_process	0.00799141	0.36504	17	278	509	16315	SH3KBP1,NCK2,HBEGF
GO:0000988	protein binding transcription factor activity	molecular_function	0.00802086	0.36504	11	278	270	16315	PER1
GO:0007275	multicellular organismal development	biological_process	0.00807241	0.365353	53	278	2201	16315	MYF5,MGP
GO:0034383	low-density lipoprotein particle clearance	biological_process	0.00822352	0.371018	2	278	8	16315	EHD1
GO:0072357	PTW/PP1 phosphatase complex	cellular_component	0.00826057	0.371518	2	278	8	16315	PPP1CB,PPP1R10,PPP1R10
GO:0043034	costamere	cellular_component	0.00849437	0.380836	2	278	8	16315	SYNM,PGM5
GO:0019882	antigen processing and presentation	biological_process	0.00858909	0.38275	4	278	48	16315	SLA-DRA1,SLA-DQA1,SLA-10,SLA-10
GO:0034375	high-density lipoprotein particle remodeling	biological_process	0.00866495	0.384059	2	278	9	16315	APOC3,APOE
GO:0043085	positive regulation of catalytic activity	biological_process	0.00874702	0.384059	17	278	508	16315	SLC37A4
GO:0016209	antioxidant activity	molecular_function	0.00875056	0.384059	4	278	47	16315	TP53INP1,APOE
GO:0017166	vinculin binding	molecular_function	0.00875426	0.384059	2	278	8	16315	DAG1,SYNM
GO:0035264	multicellular organism growth	biological_process	0.00878502	0.384231	6	278	101	16315	WDTC1
GO:0040018	positive regulation of multicellular organism growth	biological_process	0.00885262	0.386007	3	278	25	16315	STAT5B,CREB,CREB,CREB,CREB,CREB,CREB,GHR
GO:0017127	cholesterol transporter activity	molecular_function	0.0089354	0.386542	2	278	9	16315	APOA1,APOE
GO:0031981	nuclear lumen	cellular_component	0.00894597	0.386542	29	278	1034	16315	NARF
GO:0000981	sequence-specific DNA binding RNA polymerase II transcription factor activity	molecular_function	0.00939638	0.402356	7	278	136	16315	BHLHE41,BHLHE40
GO:0048011	nerve growth factor receptor signaling pathway	biological_process	0.00980844	0.418747	2	278	9	16315	PTPN11,UTP11L
GO:0006917	induction of apoptosis	biological_process	0.00986855	0.418813	6	278	105	16315	UTP11L,CDKN2C,TNFRSF12A,TP53INP1,APOE,NR4A1
GO:0046982	protein heterodimerization activity	molecular_function	0.0106605	0.444393	8	278	172	16315	ADCY2,ZHX1,BHLHE41,MAPK6,BHLHE40,TBX15,APOE,NR4A1
GO:0005912	adherens junction	cellular_component	0.0106768	0.444393	6	278	102	16315	SYNM
GO:0030334	regulation of cell migration	biological_process	0.010765	0.446264	10	278	244	16315	CXCL12,NEXN,NEXN,GAB1
GO:0001085	RNA polymerase II transcription factor binding	molecular_function	0.0108184	0.44718	4	278	49	16315	ANKRD1
GO:0002474	antigen processing and presentation of peptide antigen via MHC class I	biological_process	0.0115782	0.470774	2	278	10	16315	B2M,B2M,SLA-10,SLA-10
GO:0033077	T cell differentiation in thymus	biological_process	0.0115867	0.470774	4	278	51	16315	STAT5B,ZFP36L1
GO:0042803	protein homodimerization activity	molecular_function	0.0118533	0.474948	12	278	323	16315	GPD1,PRR2,BHLHE41,SLK,BHLHE40,GHR,TBX15,APOE,PARK7,NR4A1,ZBTB16,PDGFC
GO:0043001	Golgi to plasma membrane protein transport	biological_process	0.0118554	0.474948	2	278	9	16315	ENSSSCG00000010212
GO:0030522	intracellular receptor mediated signaling pathway	biological_process	0.0120059	0.478297	6	278	108	16315	NR1H2,NR4A1,RORA
GO:0042613	MHC class II protein complex	cellular_component	0.0121551	0.478739	2	278	10	16315	SLA-DRA1,SLA-DQA1
GO:0045778	positive regulation of ossification	biological_process	0.0122984	0.478739	3	278	28	16315	ZBTB16
GO:0006082	organic acid metabolic process	biological_process	0.0125917	0.478739	16	278	483	16315	ACADM
GO:0004861	cyclin-dependent protein kinase inhibitor activity	molecular_function	0.0129537	0.478739	2	278	11	16315	CDKN2C,CDKN1A
GO:0043691	reverse cholesterol transport	biological_process	0.0130083	0.478739	2	278	11	16315	APOA1,APOE
GO:0034614	cellular response to reactive oxygen species	biological_process	0.0130983	0.478739	3	278	28	16315	FOS
GO:0003707	steroid hormone receptor activity	molecular_function	0.013239	0.478739	4	278	52	16315	RXRG,NR1H2,NR4A1,RORA
GO:0048133	male germ-line stem cell division	biological_process	0.0133307	0.478739	1	278	1	16315	ZBTB16
GO:0034191	apolipoprotein A-I receptor binding	molecular_function	0.0138323	0.478739	1	278	1	16315	APOA1
GO:0050713	negative regulation of interleukin-1 beta secretion	biological_process	0.0138323	0.478739	1	278	1	16315	APOA1
GO:0060354	negative regulation of cell adhesion molecule production	biological_process	0.0138323	0.478739	1	278	1	16315	APOA1
GO:0032805	positive regulation of low-density lipoprotein particle receptor catabolic process	biological_process	0.0142492	0.478739	1	278	1	16315	APOE
GO:0042159	lipoprotein catabolic process	biological_process	0.0142492	0.478739	1	278	1	16315	APOE
GO:0046911	metal chelating activity	molecular_function	0.0142492	0.478739	1	278	1	16315	APOE
GO:0032332	positive regulation of chondrocyte differentiation	biological_process	0.0142717	0.478739	2	278	11	16315	PKDCC,ZBTB16
GO:0006642	triglyceride mobilization	biological_process	0.014375	0.478739	1	278	1	16315	APOC3
GO:0010897	negative regulation of triglyceride catabolic process	biological_process	0.014375	0.478739	1	278	1	16315	APOC3
GO:0010987	negative regulation of high-density lipoprotein particle clearance	biological_process	0.014375	0.478739	1	278	1	16315	APOC3
GO:0003130	BMP signaling pathway involved in heart induction	biological_process	0.0144563	0.478739	1	278	1	16315	BMP4
GO:0007500	mesodermal cell fate determination	biological_process	0.0144563	0.478739	1	278	1	16315	BMP4
GO:0048392	intermediate mesodermal cell differentiation	biological_process	0.0144563	0.478739	1	278	1	16315	BMP4
GO:0055020	positive regulation of cardiac muscle fiber development	biological_process	0.0144563	0.478739	1	278	1	16315	BMP4
GO:0060503	bud dilation involved in lung branching	biological_process	0.0144563	0.478739	1	278	1	16315	BMP4
GO:0061149	BMP signaling pathway involved in ureter morphogenesis	biological_process	0.0144563	0.478739	1	278	1	16315	BMP4
GO:0061151	BMP signaling pathway involved in renal system segmentation	biological_process	0.0144563	0.478739	1	278	1	16315	BMP4
GO:0061155	pulmonary artery endothelial tube morphogenesis	biological_process	0.0144563	0.478739	1	278	1	16315	BMP4
GO:0071893	BMP signaling pathway involved in nephric duct formation	biological_process	0.0144563	0.478739	1	278	1	16315	BMP4
GO:0072097	negative regulation of branch elongation involved in ureteric bud branching by BMP signaling pathway	biological_process	0.0144563	0.478739	1	278	1	16315	BMP4
GO:0072101	specification of ureteric bud anterior/posterior symmetry by BMP signaling pathway	biological_process	0.0144563	0.478739	1	278	1	16315	BMP4
GO:0072192	ureter epithelial cell differentiation	biological_process	0.0144563	0.478739	1	278	1	16315	BMP4
GO:0072200	negative regulation of mesenchymal cell proliferation involved in ureter development	biological_process	0.0144563	0.478739	1	278	1	16315	BMP4
GO:0090194	negative regulation of glomerulus development	biological_process	0.0144563	0.478739	1	278	1	16315	BMP4
GO:2000005	negative regulation of metanephric S-shaped body morphogenesis	biological_process	0.0144563	0.478739	1	278	1	16315	BMP4
GO:2000007	negative regulation of metanephric comma-shaped body morphogenesis	biological_process	0.0144563	0.478739	1	278	1	16315	BMP4
GO:2000137	negative regulation of cell proliferation involved in heart morphogenesis	biological_process	0.0144563	0.478739	1	278	1	16315	BMP4
GO:0072661	protein targeting to plasma membrane	biological_process	0.0144603	0.478739	2	278	10	16315	ENSSSCG00000010212,ANK1
GO:0031662	positive regulation of cyclin-dependent protein kinase activity involved in G2/M	biological_process	0.0145115	0.478739	1	278	1	16315	HSPA2
GO:0070194	synaptonemal complex disassembly	biological_process	0.0145115	0.478739	1	278	1	16315	HSPA2
GO:0032964	collagen biosynthetic process	biological_process	0.0145328	0.478739	2	278	11	16315	COL3A1
GO:0035417	negative regulation of mitotic prometaphase	biological_process	0.0145462	0.478739	1	278	1	16315	UBD,UBD
GO:0061035	regulation of cartilage development	biological_process	0.0147759	0.483581	3	278	30	16315	BMP4
GO:0042802	identical protein binding	molecular_function	0.014935	0.484508	16	278	497	16315	ATF3,COL3A1,APOA1,APOE,VIM,ZBTB16
GO:0009987	cellular process	biological_process	0.0151029	0.484508	203	278	10970	16315	JUNB
GO:0016627	oxidoreductase activity, acting on the CH-CH group of donors	molecular_function	0.0153357	0.484508	4	278	53	16315	ACADL,ACADM,TECR
GO:0004313	[acyl-carrier-protein] S-acetyltransferase activity	molecular_function	0.0154691	0.484508	1	278	1	16315	FASN
GO:0004316	3-oxoacyl-[acyl-carrier-protein] reductase (NADPH) activity	molecular_function	0.0154691	0.484508	1	278	1	16315	FASN
GO:0004317	3-hydroxypalmitoyl-[acyl-carrier-protein] dehydratase activity	molecular_function	0.0154691	0.484508	1	278	1	16315	FASN
GO:0004319	enoyl-[acyl-carrier-protein] reductase (NADPH, B-specific) activity	molecular_function	0.0154691	0.484508	1	278	1	16315	FASN
GO:0004320	oleoyl-[acyl-carrier-protein] hydrolase activity	molecular_function	0.0154691	0.484508	1	278	1	16315	FASN
GO:0016295	myristoyl-[acyl-carrier-protein] hydrolase activity	molecular_function	0.0154691	0.484508	1	278	1	16315	FASN
GO:0016296	palmitoyl-[acyl-carrier-protein] hydrolase activity	molecular_function	0.0154691	0.484508	1	278	1	16315	FASN
GO:0016297	acyl-[acyl-carrier-protein] hydrolase activity	molecular_function	0.0154691	0.484508	1	278	1	16315	FASN
GO:0042157	lipoprotein metabolic process	biological_process	0.0154818	0.484508	4	278	56	16315	APOC3,APOA1,APOE
GO:0070328	triglyceride homeostasis	biological_process	0.0158225	0.491942	2	278	12	16315	APOC3,APOA1
GO:0045954	positive regulation of natural killer cell mediated cytotoxicity	biological_process	0.0162246	0.49853	2	278	11	16315	STAT5B,PRR2
GO:0001913	T cell mediated cytotoxicity	biological_process	0.0163639	0.49853	2	278	11	16315	CTSC
GO:0042098	T cell proliferation	biological_process	0.0165697	0.49853	5	278	84	16315	CXCL12
GO:0016010	dystrophin-associated glycoprotein complex	cellular_component	0.0172999	0.49853	2	278	12	16315	DAG1,PGM5
GO:0044236	multicellular organismal metabolic process	biological_process	0.0173184	0.49853	3	278	32	16315	GHR
GO:0035499	carnosine biosynthetic process	biological_process	0.0173717	0.49853	1	278	1	16315	CARNS1
GO:0047730	carnosine synthase activity	molecular_function	0.0173717	0.49853	1	278	1	16315	CARNS1
GO:0001935	endothelial cell proliferation	biological_process	0.0174921	0.49853	4	278	58	16315	APOA1
GO:0007519	skeletal muscle tissue development	biological_process	0.017981	0.49853	6	278	119	16315	SRPK3,ZNF238
GO:0035994	response to muscle stretch	biological_process	0.0180301	0.49853	1	278	1	16315	ANKRD1
GO:0014809	regulation of skeletal muscle contraction by regulation of release of sequestered calcium ion	biological_process	0.0182158	0.49853	1	278	1	16315	CASQ1
GO:2000277	positive regulation of oxidative phosphorylation uncoupler activity	biological_process	0.0182163	0.49853	1	278	1	16315	PARK7
GO:0007281	germ cell development	biological_process	0.0182207	0.49853	5	278	89	16315	CXCL12,BMP4
GO:0060395	SMAD protein signal transduction	biological_process	0.0182327	0.49853	2	278	12	16315	FOS,BMP4
GO:0006931	substrate-dependent cell migration, cell attachment to substrate	biological_process	0.0182428	0.49853	1	278	1	16315	TNFRSF12A
GO:0004631	phosphomevalonate kinase activity	molecular_function	0.0182609	0.49853	1	278	1	16315	PMVK
GO:0005055	laminin receptor activity	molecular_function	0.018263	0.49853	1	278	1	16315	BCAM
GO:0009279	cell outer membrane	cellular_component	0.0182674	0.49853	1	278	1	16315	DAG1
GO:0021682	nerve maturation	biological_process	0.0182674	0.49853	1	278	1	16315	DAG1
GO:0003065	positive regulation of heart rate by epinephrine	biological_process	0.0182674	0.49853	1	278	1	16315	TPM1
GO:0003842	1-pyrroline-5-carboxylate dehydrogenase activity	molecular_function	0.0182674	0.49853	1	278	1	16315	ALDH4A1
GO:0019836	hemolysis by symbiont of host erythrocytes	biological_process	0.0182674	0.49853	1	278	1	16315	ALB
GO:0031095	platelet dense tubular network membrane	cellular_component	0.0182674	0.49853	1	278	1	16315	EHD1
GO:0046079	dUMP catabolic process	biological_process	0.0182674	0.49853	1	278	1	16315	NT5M
GO:0050115	myosin-light-chain-phosphatase activity	molecular_function	0.0182674	0.49853	1	278	1	16315	PPP1CB
GO:0046544	development of secondary male sexual characteristics	biological_process	0.0182674	0.49853	1	278	1	16315	STAT5B
GO:0004347	glucose-6-phosphate isomerase activity	molecular_function	0.0182675	0.49853	1	278	1	16315	GPI
GO:0016401	palmitoyl-CoA oxidase activity	molecular_function	0.0182677	0.49853	1	278	1	16315	ACADL
GO:0042413	carnitine catabolic process	biological_process	0.0182677	0.49853	1	278	1	16315	ACADL
GO:0046322	negative regulation of fatty acid oxidation	biological_process	0.0182677	0.49853	1	278	1	16315	ACADL
GO:0005584	collagen type I	cellular_component	0.0182683	0.49853	1	278	1	16315	COL3A1
GO:0005586	collagen type III	cellular_component	0.0182683	0.49853	1	278	1	16315	COL3A1
GO:0070722	Tle3-Aes complex	cellular_component	0.0182693	0.49853	1	278	1	16315	TBX15
GO:0008750	NAD(P)+ transhydrogenase (AB-specific) activity	molecular_function	0.018274	0.49853	1	278	1	16315	NNT
GO:0047676	arachidonate-CoA ligase activity	molecular_function	0.0183228	0.49853	1	278	1	16315	ACSL4
GO:0044354	macropinosome	cellular_component	0.0183278	0.49853	1	278	1	16315	CLIP1
GO:0042692	muscle cell differentiation	biological_process	0.0183288	0.49853	8	278	188	16315	SMARCD3,FBXO40
GO:0043540	6-phosphofructo-2-kinase/fructose-2,6-biphosphatase 1 complex	cellular_component	0.0183374	0.49853	1	278	1	16315	PFKFB1,PFKFB1
GO:0051463	negative regulation of cortisol secretion	biological_process	0.0183698	0.49853	1	278	1	16315	PTPN11
GO:0060125	negative regulation of growth hormone secretion	biological_process	0.0183698	0.49853	1	278	1	16315	PTPN11
GO:0046814	virion attachment, binding of host cell surface coreceptor	biological_process	0.0185115	0.501423	1	278	1	16315	PRR2
GO:0004368	glycerol-3-phosphate dehydrogenase activity	molecular_function	0.0186398	0.503943	1	278	1	16315	G3PD
GO:0044212	transcription regulatory region DNA binding	molecular_function	0.0188066	0.507282	9	278	233	16315	FOS
GO:0004903	growth hormone receptor activity	molecular_function	0.0188697	0.507282	1	278	1	16315	GHR
GO:0070195	growth hormone receptor complex	cellular_component	0.0188697	0.507282	1	278	1	16315	GHR
GO:0005914	spot adherens junction	cellular_component	0.0191007	0.50966	1	278	1	16315	PGM5
GO:0005719	nuclear euchromatin	cellular_component	0.0191598	0.509944	2	278	12	16315	CREB,CREB,CREB,CREB,CREB,CREB,TRIM24
GO:0016922	ligand-dependent nuclear receptor binding	molecular_function	0.0191826	0.509944	2	278	12	16315	SMARCD3,TRIM24
GO:0001540	beta-amyloid binding	molecular_function	0.0201091	0.527707	2	278	13	16315	APOA1,APOE
GO:0007507	heart development	biological_process	0.0201519	0.527861	10	278	266	16315	TAB2,ACADM,GAB1,COL3A1,BMP4
GO:0005913	cell-cell adherens junction	cellular_component	0.0204165	0.533535	3	278	32	16315	CMYA1,PGM5
GO:0055082	cellular chemical homeostasis	biological_process	0.0205362	0.53499	11	278	311	16315	WDTC1
GO:0005739	mitochondrion	cellular_component	0.0206844	0.536482	28	278	1075	16315	PICK1,CKMT2,MT-ND5,GPD1,SLC25A34,TXN,G3PD,ACADL,ARG2,ACADM,HSPA2,CASQ1,MT-CO1,SLC25A32,MACROD1,PIGY,TMEM160,NADH4,PARK7,SLMO2,ALDH4A1,PKM2,NT5C3,HIGD2A,ACSL4,LDHA,PLN
GO:0032355	response to estradiol stimulus	biological_process	0.0207061	0.536482	2	278	13	16315	STAT5B,GHR
GO:0006139	nucleobase-containing compound metabolic process	biological_process	0.0210727	0.544009	74	278	3433	16315	AK1
GO:0051351	positive regulation of ligase activity	biological_process	0.0217513	0.556506	2	278	13	16315	MID1IP1
GO:0070888	E-box binding	molecular_function	0.0221423	0.564468	2	278	14	16315	BHLHE40,PER1
GO:0016604	nuclear body	cellular_component	0.0222136	0.564468	6	278	122	16315	HR,BMI1,ZBTB16
GO:0045184	establishment of protein localization	biological_process	0.0222807	0.564999	18	278	606	16315	ENSSSCG00000010212
GO:0016605	PML body	cellular_component	0.0225032	0.568624	3	278	34	16315	N4BP1,HIPK3,ZBTB16
GO:0071709	membrane assembly	biological_process	0.0228687	0.572799	1	278	1	16315	ENSSSCG00000010212
GO:0072660	maintenance of protein location in plasma membrane	biological_process	0.0228687	0.572799	1	278	1	16315	ENSSSCG00000010212
GO:0043516	regulation of DNA damage response, signal transduction by p53 class mediator	biological_process	0.0242403	0.598715	2	278	14	16315	SMYD2
GO:0048661	positive regulation of smooth muscle cell proliferation	biological_process	0.0242775	0.598715	2	278	15	16315	BMP4,HBEGF
GO:0001568	blood vessel development	biological_process	0.0244392	0.598715	11	278	319	16315	COL3A1,BMP4
GO:0070412	R-SMAD binding	molecular_function	0.0244538	0.598715	2	278	14	16315	FOS,ANKRD1
GO:0015629	actin cytoskeleton	cellular_component	0.0245732	0.598715	9	278	235	16315	ABRA,SLC16A3,TPM1,NP_001038058.1
GO:0050727	regulation of inflammatory response	biological_process	0.0248897	0.605394	5	278	96	16315	PARK7
GO:0042110	T cell activation	biological_process	0.0252792	0.613825	8	278	201	16315	DDOST
GO:0000979	RNA polymerase II core promoter sequence-specific DNA binding	molecular_function	0.0253861	0.615336	2	278	15	16315	STAT5B,NFIL3,NFIL3
GO:0046332	SMAD binding	molecular_function	0.0254274	0.615336	3	278	37	16315	COL3A1
GO:0005578	proteinaceous extracellular matrix	cellular_component	0.0255679	0.617688	8	278	197	16315	ADAMTS8
GO:0051651	maintenance of location in cell	biological_process	0.0256515	0.618564	4	278	62	16315	APOE
GO:0042391	regulation of membrane potential	biological_process	0.0258191	0.618564	6	278	128	16315	CMYA1
GO:0071813	lipoprotein particle binding	molecular_function	0.0258204	0.618564	2	278	15	16315	APOA1,APOE
GO:0000978	RNA polymerase II core promoter proximal region sequence-specific DNA binding	molecular_function	0.026246	0.623538	2	278	15	16315	BHLHE41,PER1
GO:0045597	positive regulation of cell differentiation	biological_process	0.0269185	0.637399	10	278	286	16315	BMP4,JUNB
GO:0010903	negative regulation of very-low-density lipoprotein particle remodeling	biological_process	0.0273081	0.643427	1	278	2	16315	APOA1
GO:0018158	protein oxidation	biological_process	0.0273081	0.643427	1	278	2	16315	APOA1
GO:0072161	mesenchymal cell differentiation involved in kidney development	biological_process	0.027444	0.644507	1	278	2	16315	BMP4
GO:2001012	mesenchymal cell differentiation involved in renal system development	biological_process	0.027444	0.644507	1	278	2	16315	BMP4
GO:0006612	protein targeting to membrane	biological_process	0.0275435	0.645783	3	278	38	16315	CACNB1
GO:0060621	negative regulation of cholesterol import	biological_process	0.0278434	0.649619	1	278	2	16315	APOC3
GO:0071277	cellular response to calcium ion	biological_process	0.0279905	0.651986	2	278	15	16315	FOS,JUNB
GO:0071560	cellular response to transforming growth factor beta stimulus	biological_process	0.028241	0.656359	2	278	15	16315	COL4A2,ANKRD1
GO:0016567	protein ubiquitination	biological_process	0.02827	0.656359	9	278	241	16315	UBD,UBD,MARCH2,MARCH6,FBXO40,TRIM24
GO:0030492	hemoglobin binding	molecular_function	0.0287469	0.664651	1	278	2	16315	HP
GO:0007029	endoplasmic reticulum organization	biological_process	0.0287665	0.664651	2	278	15	16315	CASQ1
GO:0043407	negative regulation of MAP kinase activity	biological_process	0.029199	0.670311	3	278	39	16315	BMP4,APOE
GO:0034115	negative regulation of heterotypic cell-cell adhesion	biological_process	0.0300464	0.684392	1	278	2	16315	APOA1
GO:0005829	cytosol	cellular_component	0.0300516	0.684392	15	278	502	16315	PMVK,TXN,DNAJB5,LIPE,TP53INP1,FAM213B,ANKRD1,WDTC1,VIM,UBL4A,MID1IP1,SMYD2,LDHA
GO:0001944	vasculature development	biological_process	0.0304209	0.689996	11	278	330	16315	BMP4
GO:0004618	phosphoglycerate kinase activity	molecular_function	0.0306198	0.690321	1	278	2	16315	PGK1
GO:0002504	antigen processing and presentation of peptide or polysaccharide antigen via MHC class II	biological_process	0.0307058	0.690321	2	278	16	16315	SLA-DRA1,SLA-DQA1
GO:0035993	deltoid tuberosity development	biological_process	0.0308861	0.690321	1	278	2	16315	BMP4
GO:0031647	regulation of protein stability	biological_process	0.0310895	0.690321	4	278	69	16315	TRIM24
GO:0042612	MHC class I protein complex	cellular_component	0.0312078	0.690321	2	278	17	16315	B2M,B2M,SLA-10,SLA-10
GO:0051899	membrane depolarization	biological_process	0.0312491	0.690321	3	278	38	16315	PARK7
GO:0060415	muscle tissue morphogenesis	biological_process	0.0312543	0.690321	3	278	40	16315	MYF5
GO:0046825	regulation of protein export from nucleus	biological_process	0.0312615	0.690321	2	278	16	16315	PTPN11
GO:0007565	female pregnancy	biological_process	0.0312916	0.690321	3	278	40	16315	STAT5B
GO:0046898	response to cycloheximide	biological_process	0.0313082	0.690321	1	278	2	16315	GHR
GO:0003677	DNA binding	molecular_function	0.0313766	0.690321	31	278	1296	16315	FOS,LYL1,ZHX1,STAT5B,RFX7,ENSSSCG00000007999,ZBED6,RXRG,ATF3,CREB,CREB,CREB,CREB,CREB,CREB,CREB,FOXN3,BHLHE41,MYF5,ALB,ANKRD1,AHDC1,NFE2L2,BHLHE40,TBX15,PPP1R10,PPP1R10,NR1H2,NR4A1,JUNB,RORA,ZBTB16
GO:0046340	diacylglycerol catabolic process	biological_process	0.0315571	0.690321	1	278	2	16315	LIPE
GO:0033088	negative regulation of immature T cell proliferation in thymus	biological_process	0.0315944	0.690321	1	278	2	16315	BMP4
GO:0004315	3-oxoacyl-[acyl-carrier-protein] synthase activity	molecular_function	0.0316152	0.690321	1	278	2	16315	FASN
GO:0006607	NLS-bearing substrate import into nucleus	biological_process	0.0319007	0.695494	1	278	2	16315	DAG1
GO:0045541	negative regulation of cholesterol biosynthetic process	biological_process	0.0320177	0.695922	1	278	2	16315	APOE
GO:0045600	positive regulation of fat cell differentiation	biological_process	0.0323431	0.698245	2	278	17	16315	CREB,CREB,CREB,CREB,CREB,CREB,ZBTB16
GO:0034227	tRNA thio-modification	biological_process	0.032388	0.698245	1	278	2	16315	URM1
GO:0061047	positive regulation of branching involved in lung morphogenesis	biological_process	0.0324631	0.698245	1	278	2	16315	BMP4
GO:0072125	negative regulation of glomerular mesangial cell proliferation	biological_process	0.0325682	0.698245	1	278	2	16315	BMP4
GO:2000107	negative regulation of leukocyte apoptosis	biological_process	0.0326128	0.698245	2	278	17	16315	CXCL12
GO:0015760	glucose-6-phosphate transport	biological_process	0.032733	0.698728	1	278	2	16315	SLC37A4
GO:0004314	[acyl-carrier-protein] S-malonyltransferase activity	molecular_function	0.0331467	0.701278	1	278	2	16315	FASN
GO:0004367	glycerol-3-phosphate dehydrogenase [NAD+] activity	molecular_function	0.0335682	0.703722	1	278	2	16315	GPD1
GO:0046168	glycerol-3-phosphate catabolic process	biological_process	0.0335682	0.703722	1	278	2	16315	GPD1
GO:0060197	cloacal septation	biological_process	0.0336269	0.703722	1	278	2	16315	BMP4
GO:0030055	cell-substrate junction	cellular_component	0.0338889	0.703722	4	278	68	16315	TNS1,PGM5
GO:2000121	regulation of removal of superoxide radicals	biological_process	0.0339624	0.703722	1	278	2	16315	NFE2L2
GO:0019530	taurine metabolic process	biological_process	0.0341728	0.703722	1	278	2	16315	STAT5B
GO:0048609	multicellular organismal reproductive process	biological_process	0.0341792	0.703722	10	278	298	16315	PTPN11
GO:0051791	medium-chain fatty acid metabolic process	biological_process	0.034368	0.703722	1	278	2	16315	ACADM
GO:0001823	mesonephros development	biological_process	0.0345488	0.703722	2	278	17	16315	BMP4,ZBTB16
GO:0043534	blood vessel endothelial cell migration	biological_process	0.0346138	0.703722	3	278	41	16315	APOA1
GO:0070669	response to interleukin-2	biological_process	0.0348716	0.703722	1	278	2	16315	STAT5B
GO:0051901	positive regulation of mitochondrial depolarization	biological_process	0.034886	0.703722	1	278	2	16315	MLLT11
GO:0019897	extrinsic to plasma membrane	cellular_component	0.0349801	0.703722	3	278	41	16315	ANXA2,ANXA2,MFGE8,S100A10,S100A10,S100A10,S100A10
GO:0071535	RING-like zinc finger domain binding	molecular_function	0.0350591	0.703722	1	278	2	16315	BMI1
GO:0004392	heme oxygenase (decyclizing) activity	molecular_function	0.0352162	0.703722	1	278	2	16315	HMOX2
GO:0006788	heme oxidation	biological_process	0.0352162	0.703722	1	278	2	16315	HMOX2
GO:0003875	ADP-ribosylarginine hydrolase activity	molecular_function	0.0353281	0.703722	1	278	2	16315	ADPRHL1
GO:0051725	protein de-ADP-ribosylation	biological_process	0.0353281	0.703722	1	278	2	16315	ADPRHL1
GO:0004886	retinoid-X receptor activity	molecular_function	0.0353322	0.703722	1	278	2	16315	RXRG
GO:0048550	negative regulation of pinocytosis	biological_process	0.0353644	0.703722	1	278	2	16315	NR1H2
GO:0050821	protein stabilization	biological_process	0.0355234	0.703722	3	278	42	16315	CREB,CREB,CREB,CREB,CREB,CREB,APOA1,PARK7
GO:0006941	striated muscle contraction	biological_process	0.0357225	0.703722	3	278	41	16315	ARG2
GO:0000255	allantoin metabolic process	biological_process	0.0358182	0.703722	1	278	2	16315	STAT5B
GO:0015643	toxin binding	molecular_function	0.0358217	0.703722	1	278	2	16315	ALB
GO:0016881	acid-amino acid ligase activity	molecular_function	0.03583	0.703722	8	278	211	16315	UBE2QL1
GO:0042997	negative regulation of Golgi to plasma membrane protein transport	biological_process	0.0360616	0.703722	1	278	2	16315	PKDCC
GO:0051659	maintenance of mitochondrion location	biological_process	0.0362023	0.703722	1	278	2	16315	ALB
GO:0006549	isoleucine metabolic process	biological_process	0.0362023	0.703722	1	278	2	16315	STAT5B
GO:0006573	valine metabolic process	biological_process	0.0362023	0.703722	1	278	2	16315	STAT5B
GO:0006600	creatine metabolic process	biological_process	0.0362023	0.703722	1	278	2	16315	STAT5B
GO:0070256	negative regulation of mucus secretion	biological_process	0.0362034	0.703722	1	278	2	16315	ADORA1
GO:0004053	arginase activity	molecular_function	0.036205	0.703722	1	278	2	16315	ARG2
GO:0006101	citrate metabolic process	biological_process	0.0362056	0.703722	1	278	2	16315	STAT5B
GO:0031340	positive regulation of vesicle fusion	biological_process	0.0362057	0.703722	1	278	2	16315	ANXA2
GO:0060397	JAK-STAT cascade involved in growth hormone signaling pathway	biological_process	0.0362258	0.703722	1	278	2	16315	STAT5B
GO:0045329	carnitine biosynthetic process	biological_process	0.0362393	0.703722	1	278	2	16315	ACADM
GO:0043202	lysosomal lumen	cellular_component	0.0362431	0.703722	1	278	2	16315	SCARB2
GO:0046975	histone methyltransferase activity (H3-K36 specific)	molecular_function	0.0362561	0.703722	1	278	2	16315	SMYD2
GO:0004865	protein serine/threonine phosphatase inhibitor activity	molecular_function	0.036279	0.703722	1	278	2	16315	PPP1R14C
GO:0043425	bHLH transcription factor binding	molecular_function	0.0362876	0.703722	2	278	18	16315	BHLHE41,BHLHE40
GO:0030382	sperm mitochondrion organization	biological_process	0.0362893	0.703722	1	278	2	16315	PRR2
GO:0004558	alpha-glucosidase activity	molecular_function	0.0362941	0.703722	1	278	2	16315	GANC
GO:0019215	intermediate filament binding	molecular_function	0.0363154	0.703722	1	278	2	16315	SYNM
GO:0046449	creatinine metabolic process	biological_process	0.03633	0.703722	1	278	2	16315	STAT5B
GO:0070991	medium-chain-acyl-CoA dehydrogenase activity	molecular_function	0.0363389	0.703722	1	278	2	16315	ACADM
GO:0004466	long-chain-acyl-CoA dehydrogenase activity	molecular_function	0.036339	0.703722	1	278	2	16315	ACADL
GO:0004719	protein-L-isoaspartate (D-aspartate) O-methyltransferase activity	molecular_function	0.0363896	0.703722	1	278	2	16315	PCMTD1
GO:0060370	susceptibility to T cell mediated cytotoxicity	biological_process	0.0364113	0.703722	1	278	2	16315	PRR2
GO:0005899	insulin receptor complex	cellular_component	0.0365229	0.704927	1	278	2	16315	SORBS1
GO:0017160	Ral GTPase binding	molecular_function	0.0366264	0.705082	1	278	2	16315	EXOC2
GO:0042158	lipoprotein biosynthetic process	biological_process	0.0366295	0.705082	3	278	42	16315	APOA1,APOE
GO:0072138	mesenchymal cell proliferation involved in ureteric bud development	biological_process	0.0368472	0.708318	1	278	2	16315	BMP4
GO:0006486	protein glycosylation	biological_process	0.0373501	0.714146	5	278	108	16315	ST3GAL1,ST3GAL1,SIAT7B
GO:0016614	oxidoreductase activity, acting on CH-OH group of donors	molecular_function	0.0374866	0.715799	5	278	104	16315	GPD1
GO:0030500	regulation of bone mineralization	biological_process	0.0376073	0.717146	3	278	43	16315	MGP
GO:0030195	negative regulation of blood coagulation	biological_process	0.0379494	0.721745	2	278	18	16315	APOE
GO:0016310	phosphorylation	biological_process	0.0381496	0.724589	29	278	1166	16315	PFKFB1,CKMT2,AK1,PGK1,PKM2
GO:0019899	enzyme binding	molecular_function	0.0390101	0.73946	19	278	693	16315	PICK1,MARCH6,SCARB2,APOA1
GO:0019221	cytokine-mediated signaling pathway	biological_process	0.0392094	0.740852	6	278	144	16315	STAT5B,ENSSSCG00000027628,GHR
GO:0051347	positive regulation of transferase activity	biological_process	0.0392131	0.740852	8	278	219	16315	APOA1
GO:0008361	regulation of cell size	biological_process	0.0393516	0.741867	3	278	42	16315	CREB,CREB,CREB,CREB,CREB,CREB,WDTC1
GO:0007155	cell adhesion	biological_process	0.0393705	0.741867	15	278	508	16315	CPXM1,TNFRSF12A,BCAM,MFGE8,CD36,CD36,SCARB2,THBS2,ENSSSCG00000005381
GO:0050728	negative regulation of inflammatory response	biological_process	0.0395518	0.744301	3	278	44	16315	ADORA1,APOA1,APOE
GO:0003995	acyl-CoA dehydrogenase activity	molecular_function	0.0401534	0.753604	2	278	18	16315	ACADL,ACADM
GO:0055007	cardiac muscle cell differentiation	biological_process	0.0408037	0.761847	3	278	44	16315	ACADM,BMP4
GO:0034599	cellular response to oxidative stress	biological_process	0.0412871	0.767865	3	278	43	16315	NFE2L2,PARK7
GO:0060228	phosphatidylcholine-sterol O-acyltransferase activator activity	molecular_function	0.0415215	0.771188	1	278	3	16315	APOA1
GO:0030097	hemopoiesis	biological_process	0.0430244	0.790919	11	278	351	16315	BMI1,ZBTB16
GO:0048706	embryonic skeletal system development	biological_process	0.0433942	0.795671	4	278	80	16315	COL3A1,BMP4,BMI1
GO:0016192	vesicle-mediated transport	biological_process	0.0435851	0.798149	14	278	471	16315	STX16,STX16,STX16,STX16,STX16,STX16
GO:0034612	response to tumor necrosis factor	biological_process	0.0441398	0.806242	3	278	46	16315	UBD,UBD
GO:0042030	ATPase inhibitor activity	molecular_function	0.0444514	0.807207	1	278	3	16315	PLN
GO:0042102	positive regulation of T cell proliferation	biological_process	0.0444628	0.807207	3	278	45	16315	NCK2
GO:0035990	tendon cell differentiation	biological_process	0.0447006	0.807207	1	278	3	16315	BMP4
GO:0071363	cellular response to growth factor stimulus	biological_process	0.0449679	0.808778	5	278	111	16315	CREB,CREB,CREB,CREB,CREB,CREB,BMP4
GO:0034190	apolipoprotein receptor binding	molecular_function	0.0450784	0.808778	1	278	3	16315	APOA1
GO:0008035	high-density lipoprotein particle binding	molecular_function	0.0450805	0.808778	1	278	3	16315	APOA1
GO:0072104	glomerular capillary formation	biological_process	0.0452119	0.808778	1	278	3	16315	BMP4
GO:0060449	bud elongation involved in lung branching	biological_process	0.0458419	0.812968	1	278	3	16315	BMP4
GO:0010916	negative regulation of very-low-density lipoprotein particle clearance	biological_process	0.0459785	0.812968	1	278	3	16315	APOC3
GO:0002043	blood vessel endothelial cell proliferation involved in sprouting angiogenesis	biological_process	0.0461015	0.814004	1	278	3	16315	BMP4
GO:0003219	cardiac right ventricle formation	biological_process	0.0466438	0.822306	1	278	3	16315	SMARCD3
GO:0060440	trachea formation	biological_process	0.046861	0.822339	1	278	3	16315	BMP4
GO:0015844	monoamine transport	biological_process	0.0469557	0.822991	2	278	20	16315	PICK1
GO:0008373	sialyltransferase activity	molecular_function	0.047137	0.82339	2	278	20	16315	ST3GAL1,ST3GAL1,SIAT7B
GO:0010159	specification of organ position	biological_process	0.0474602	0.82339	1	278	3	16315	BMP4
GO:0048102	autophagic cell death	biological_process	0.0475132	0.82339	1	278	3	16315	TP53INP1
GO:0005891	voltage-gated calcium channel complex	cellular_component	0.0478508	0.82339	2	278	19	16315	CACNB1
GO:0008137	NADH dehydrogenase (ubiquinone) activity	molecular_function	0.0488804	0.838235	2	278	22	16315	MT-ND5,NADH4
GO:0035068	micro-ribonucleoprotein complex	cellular_component	0.0491716	0.840021	1	278	3	16315	EIF2C4
GO:0030336	negative regulation of cell migration	biological_process	0.0492394	0.840021	4	278	79	16315	TP53INP1,DAG1
GO:0045944	positive regulation of transcription from RNA polymerase II promoter	biological_process	0.0492442	0.840021	14	278	495	16315	FOS,MURC,STAT5B,ABRA,RXRG,HFE2,CREB,CREB,CREB,CREB,CREB,CREB,BMP4,ANKRD1,NFE2L2,NR1H2,NCK2,NR4A1,RORA
GO:0010804	negative regulation of tumor necrosis factor-mediated signaling pathway	biological_process	0.0495357	0.840021	1	278	3	16315	APOA1
GO:0045236	CXCR chemokine receptor binding	molecular_function	0.0496005	0.840021	1	278	3	16315	CXCL12
GO:0004842	ubiquitin-protein ligase activity	molecular_function	0.0496585	0.840021	6	278	148	16315	RNF144B,MARCH2,MARCH6,BMI1,FBXO40,TRIM24
GO:2000427	positive regulation of apoptotic cell clearance	biological_process	0.0496962	0.840021	1	278	3	16315	MFGE8
GO:0044242	cellular lipid catabolic process	biological_process	0.049813	0.840021	4	278	78	16315	ACADL
GO:0008429	phosphatidylethanolamine binding	molecular_function	0.049865	0.840021	1	278	3	16315	MFGE8
GO:0010989	negative regulation of low-density lipoprotein particle clearance	biological_process	0.0500587	0.840021	1	278	3	16315	APOC3
GO:0002098	tRNA wobble uridine modification	biological_process	0.0500658	0.840021	1	278	3	16315	URM1
GO:0070842	aggresome assembly	biological_process	0.0502238	0.840021	1	278	3	16315	UBD,UBD
GO:0071816	tail-anchored membrane protein insertion into ER membrane	biological_process	0.0502421	0.840021	1	278	3	16315	UBL4A
GO:0071818	BAT3 complex	cellular_component	0.0502421	0.840021	1	278	3	16315	UBL4A
GO:0048156	tau protein binding	molecular_function	0.0503239	0.840021	1	278	3	16315	APOE
GO:2000105	positive regulation of DNA-dependent DNA replication	biological_process	0.0503602	0.840021	1	278	3	16315	BMP4
GO:0032682	negative regulation of chemokine production	biological_process	0.0505549	0.840937	1	278	3	16315	SLC37A4
GO:0070700	BMP receptor binding	molecular_function	0.0506801	0.840937	1	278	3	16315	BMP4
GO:0001955	blood vessel maturation	biological_process	0.0507863	0.840937	1	278	3	16315	LYL1
GO:0031177	phosphopantetheine binding	molecular_function	0.0511314	0.840937	1	278	3	16315	FASN
GO:0033018	sarcoplasmic reticulum lumen	cellular_component	0.0512454	0.840937	1	278	3	16315	CASQ1
GO:0006107	oxaloacetate metabolic process	biological_process	0.0513965	0.840937	1	278	3	16315	STAT5B
GO:0030501	positive regulation of bone mineralization	biological_process	0.0518132	0.840937	2	278	21	16315	PKDCC,BMP4
GO:0055074	calcium ion homeostasis	biological_process	0.051818	0.840937	5	278	114	16315	TRIM24
GO:0070562	regulation of vitamin D receptor signaling pathway	biological_process	0.0518299	0.840937	1	278	3	16315	TRIM24
GO:0044183	protein binding involved in protein folding	molecular_function	0.0519793	0.840937	1	278	3	16315	ENSSSCG00000030054
GO:0043153	entrainment of circadian clock by photoperiod	biological_process	0.0520373	0.840937	1	278	3	16315	BHLHE40
GO:0019064	viral envelope fusion with host membrane	biological_process	0.0522557	0.840937	1	278	3	16315	PRR2
GO:0007595	lactation	biological_process	0.0523717	0.840937	2	278	21	16315	STAT5B,CREB,CREB,CREB,CREB,CREB,CREB
GO:0033092	positive regulation of immature T cell proliferation in thymus	biological_process	0.0524358	0.840937	1	278	3	16315	BMI1
GO:0006412	translation	biological_process	0.0528847	0.840937	15	278	573	16315	ENSSSCG00000024398,EIF1AY
GO:0006955	immune response	biological_process	0.0529245	0.840937	13	278	456	16315	SLA-DRA1,CXCL12,SLA-DQA1,B2M,B2M,SLA-10,SLA-10
GO:0010887	negative regulation of cholesterol storage	biological_process	0.0531612	0.840937	1	278	3	16315	NR1H2
GO:0032190	acrosin binding	molecular_function	0.0532042	0.840937	1	278	3	16315	ZP2
GO:0060020	Bergmann glial cell differentiation	biological_process	0.0532246	0.840937	1	278	3	16315	VIM
GO:0001514	selenocysteine incorporation	biological_process	0.0534336	0.840937	1	278	3	16315	TRNAU1AP
GO:0003700	sequence-specific DNA binding transcription factor activity	molecular_function	0.0534665	0.840937	18	278	705	16315	FOS,ZHX1,STAT5B,NFIL3,NFIL3,RXRG,ATF3,CREB,CREB,CREB,CREB,CREB,CREB,FOXN3,NFE2L2,TBX15,NR1H2,NR4A1,JUNB,RORA,ATF5,ZXDC
GO:0005726	perichromatin fibrils	cellular_component	0.0535692	0.840937	1	278	3	16315	TRIM24
GO:0002175	protein localization to paranode region of axon	biological_process	0.0535857	0.840937	1	278	3	16315	ENSSSCG00000017381
GO:0015037	peptide disulfide oxidoreductase activity	molecular_function	0.053757	0.840937	1	278	3	16315	TXN
GO:0006105	succinate metabolic process	biological_process	0.0538107	0.840937	1	278	3	16315	STAT5B
GO:0042448	progesterone metabolic process	biological_process	0.0538107	0.840937	1	278	3	16315	STAT5B
GO:0007016	cytoskeletal anchoring at plasma membrane	biological_process	0.0538107	0.840937	1	278	3	16315	DAG1
GO:0070389	chaperone cofactor-dependent protein refolding	biological_process	0.0538108	0.840937	1	278	3	16315	DNAJC7
GO:0034056	estrogen response element binding	molecular_function	0.0538109	0.840937	1	278	3	16315	TRIM24
GO:0005859	muscle myosin complex	cellular_component	0.0538239	0.840937	1	278	3	16315	MYH1
GO:0030033	microvillus assembly	biological_process	0.0538292	0.840937	1	278	3	16315	RDX
GO:0019534	toxin transporter activity	molecular_function	0.0539557	0.840937	1	278	3	16315	SLC7A8,SLC7A8
GO:0042271	susceptibility to natural killer cell mediated cytotoxicity	biological_process	0.054016	0.840937	1	278	3	16315	PRR2
GO:0032183	SUMO binding	molecular_function	0.0540594	0.840937	1	278	3	16315	USP25
GO:0004768	stearoyl-CoA 9-desaturase activity	molecular_function	0.0541745	0.840937	1	278	3	16315	SCD
GO:0005730	nucleolus	cellular_component	0.0542122	0.840937	11	278	359	16315	N4BP1,RDX,ZBED6,ATF3,CEP85,BHLHE40,NMRAL1,BMI1,STX16,STX16,STX16,STX16,STX16,DDX46,RRS1
GO:0005521	lamin binding	molecular_function	0.0544691	0.843819	1	278	3	16315	NARF
GO:0002062	chondrocyte differentiation	biological_process	0.054516	0.843819	3	278	49	16315	BMP4
GO:0048844	artery morphogenesis	biological_process	0.0546365	0.844769	2	278	23	16315	APOE
GO:0005654	nucleoplasm	cellular_component	0.0554394	0.855334	16	278	586	16315	DAG1
GO:0033578	protein glycosylation in Golgi	biological_process	0.055502	0.855377	1	278	3	16315	LMF1
GO:0032426	stereocilium bundle tip	cellular_component	0.055662	0.856816	1	278	3	16315	CEACAM16,CEACAM16
GO:0014731	spectrin-associated cytoskeleton	cellular_component	0.0557152	0.856816	1	278	3	16315	ANK1
GO:0045860	positive regulation of protein kinase activity	biological_process	0.0557757	0.856825	7	278	195	16315	TAB2
GO:0035116	embryonic hindlimb morphogenesis	biological_process	0.0560336	0.859367	2	278	22	16315	BMP4,ZBTB16
GO:0060441	epithelial tube branching involved in lung morphogenesis	biological_process	0.0560907	0.859367	2	278	23	16315	BMP4,DAG1
GO:0033268	node of Ranvier	cellular_component	0.056124	0.859367	1	278	3	16315	DAG1
GO:0045454	cell redox homeostasis	biological_process	0.0561815	0.859367	3	278	50	16315	TXN,SEPW1,TMX4
GO:0043234	protein complex	cellular_component	0.0563373	0.86083	45	278	2029	16315	COL6A2,DDOST,ALB
GO:0002011	morphogenesis of an epithelial sheet	biological_process	0.0569415	0.867281	2	278	22	16315	DAG1
GO:0002244	hemopoietic progenitor cell differentiation	biological_process	0.0571601	0.867444	2	278	23	16315	BMP4
GO:0002740	negative regulation of cytokine secretion involved in immune response	biological_process	0.0572969	0.868073	1	278	4	16315	APOA1
GO:0050840	extracellular matrix binding	molecular_function	0.0576113	0.87007	2	278	22	16315	BGN
GO:0042826	histone deacetylase binding	molecular_function	0.0576825	0.870227	3	278	50	16315	BHLHE41,ANKRD1,WDTC1
GO:0019048	virus-host interaction	biological_process	0.0590965	0.886882	2	278	23	16315	DAG1
GO:0031397	negative regulation of protein ubiquitination	biological_process	0.059179	0.887189	2	278	23	16315	N4BP1,NXN
GO:0045995	regulation of embryonic development	biological_process	0.0600252	0.896974	3	278	51	16315	NFE2L2
GO:0004743	pyruvate kinase activity	molecular_function	0.0600298	0.896974	1	278	4	16315	PKM2
GO:0018149	peptide cross-linking	biological_process	0.0600826	0.896974	2	278	23	16315	COL3A1
GO:0006979	response to oxidative stress	biological_process	0.0609253	0.904833	5	278	120	16315	GAB1,APOE
GO:0051726	regulation of cell cycle	biological_process	0.0612465	0.907698	12	278	415	16315	JUNB,GADD45G
GO:0007263	nitric oxide mediated signal transduction	biological_process	0.0613955	0.908045	1	278	4	16315	APOE
GO:0048646	anatomical structure formation involved in morphogenesis	biological_process	0.0619223	0.912349	24	278	985	16315	BMP4
GO:0016042	lipid catabolic process	biological_process	0.0619417	0.912349	5	278	121	16315	LIPE,APOC3
GO:0000060	protein import into nucleus, translocation	biological_process	0.0621	0.9128	2	278	23	16315	ABRA
GO:0072193	ureter smooth muscle cell differentiation	biological_process	0.062512	0.914203	1	278	4	16315	BMP4
GO:0008190	eukaryotic initiation factor 4E binding	molecular_function	0.062729	0.914203	1	278	4	16315	EIF4EBP1
GO:0006464	protein modification process	biological_process	0.0628347	0.914203	42	278	1877	16315	PCMTD1
GO:0048261	negative regulation of receptor-mediated endocytosis	biological_process	0.0635926	0.920548	1	278	4	16315	APOC3
GO:0051099	positive regulation of binding	biological_process	0.0642255	0.925917	3	278	53	16315	ANXA2,ANXA2,S100A10,S100A10,S100A10,S100A10
GO:0071230	cellular response to amino acid stimulus	biological_process	0.0642692	0.925917	2	278	24	16315	COL3A1,PDGFC
GO:0042981	regulation of apoptosis	biological_process	0.0642872	0.925917	17	278	652	16315	TRIM24
GO:0070469	respiratory chain	cellular_component	0.0654523	0.93633	3	278	58	16315	MT-ND5,MT-CO1,NADH4
GO:0072198	mesenchymal cell proliferation involved in ureter development	biological_process	0.0654685	0.93633	1	278	4	16315	BMP4
GO:0030828	positive regulation of cGMP biosynthetic process	biological_process	0.066316	0.938879	1	278	4	16315	APOE
GO:0000186	activation of MAPKK activity	biological_process	0.0667138	0.938879	2	278	24	16315	BMP4,GADD45G
GO:0051005	negative regulation of lipoprotein lipase activity	biological_process	0.0668091	0.938879	1	278	4	16315	APOC3
GO:0003836	beta-galactoside (CMP) alpha-2,3-sialyltransferase activity	molecular_function	0.0669181	0.938879	1	278	4	16315	ST3GAL1,ST3GAL1
GO:0010832	negative regulation of myotube differentiation	biological_process	0.0669368	0.938879	1	278	4	16315	BHLHE41
GO:0003093	regulation of glomerular filtration	biological_process	0.0669409	0.938879	1	278	4	16315	ADORA1
GO:0035166	post-embryonic hemopoiesis	biological_process	0.0672832	0.938879	1	278	4	16315	SLC37A4
GO:0010867	positive regulation of triglyceride biosynthetic process	biological_process	0.0674154	0.938879	1	278	4	16315	NR1H2
GO:0045740	positive regulation of DNA replication	biological_process	0.0674397	0.938879	2	278	25	16315	PDGFC
GO:0060686	negative regulation of prostatic bud formation	biological_process	0.0680012	0.938879	1	278	4	16315	BMP4
GO:0001780	neutrophil homeostasis	biological_process	0.0680285	0.938879	1	278	4	16315	SLC37A4
GO:0035259	glucocorticoid receptor binding	molecular_function	0.068095	0.938879	1	278	4	16315	STAT5B
GO:0019934	cGMP-mediated signaling	biological_process	0.0681977	0.938879	1	278	4	16315	APOE
GO:0045588	positive regulation of gamma-delta T cell differentiation	biological_process	0.0682548	0.938879	1	278	4	16315	STAT5B
GO:0072015	glomerular visceral epithelial cell development	biological_process	0.0687672	0.938879	1	278	4	16315	BMP4
GO:0051583	dopamine uptake	biological_process	0.0689052	0.938879	1	278	4	16315	PARK7
GO:0002318	myeloid progenitor cell differentiation	biological_process	0.0690534	0.938879	1	278	4	16315	SLC37A4
GO:0045087	innate immune response	biological_process	0.0690968	0.938879	5	278	125	16315	PBD-2
GO:0048008	platelet-derived growth factor receptor signaling pathway	biological_process	0.0691554	0.938879	2	278	24	16315	GAB1,PDGFC
GO:0070326	very-low-density lipoprotein particle receptor binding	molecular_function	0.0691574	0.938879	1	278	4	16315	APOE
GO:0000015	phosphopyruvate hydratase complex	cellular_component	0.0692155	0.938879	1	278	4	16315	ENO3
GO:0004634	phosphopyruvate hydratase activity	molecular_function	0.0692155	0.938879	1	278	4	16315	ENO3
GO:2000279	negative regulation of DNA biosynthetic process	biological_process	0.0693324	0.938879	1	278	4	16315	ANKRD1
GO:0032040	small-subunit processome	cellular_component	0.0694319	0.938879	1	278	4	16315	UTP11L
GO:0003714	transcription corepressor activity	molecular_function	0.069454	0.938879	4	278	88	16315	ZHX1,HR,ANKRD1
GO:0042605	peptide antigen binding	molecular_function	0.0694651	0.938879	1	278	4	16315	SLA-DQA1
GO:0006089	lactate metabolic process	biological_process	0.0699218	0.938879	1	278	4	16315	SLC37A4
GO:0006622	protein targeting to lysosome	biological_process	0.0701013	0.938879	1	278	4	16315	SCARB2
GO:0048701	embryonic cranial skeleton morphogenesis	biological_process	0.0701483	0.938879	2	278	26	16315	BMP4,TBX15
GO:0006869	lipid transport	biological_process	0.0708532	0.938879	5	278	125	16315	APOC3,APOA1,APOE
GO:0030913	paranodal junction assembly	biological_process	0.0708778	0.938879	1	278	4	16315	ENSSSCG00000017381
GO:0004859	phospholipase inhibitor activity	molecular_function	0.070963	0.938879	1	278	4	16315	ANXA2,ANXA2
GO:0035749	myelin sheath adaxonal region	cellular_component	0.0710747	0.938879	1	278	4	16315	ANXA2,ANXA2
GO:0004791	thioredoxin-disulfide reductase activity	molecular_function	0.0711015	0.938879	1	278	4	16315	NXN
GO:0032819	positive regulation of natural killer cell proliferation	biological_process	0.071105	0.938879	1	278	4	16315	STAT5B
GO:0008331	high voltage-gated calcium channel activity	molecular_function	0.0711299	0.938879	1	278	4	16315	CACNB1
GO:0010873	positive regulation of cholesterol esterification	biological_process	0.0711399	0.938879	1	278	5	16315	APOA1
GO:0004467	long-chain fatty acid-CoA ligase activity	molecular_function	0.0711543	0.938879	1	278	4	16315	ACSL4
GO:0003873	6-phosphofructo-2-kinase activity	molecular_function	0.0711663	0.938879	1	278	4	16315	PFKFB1,PFKFB1
GO:0004331	fructose-2,6-bisphosphate 2-phosphatase activity	molecular_function	0.0711663	0.938879	1	278	4	16315	PFKFB1,PFKFB1
GO:0006003	fructose 2,6-bisphosphate metabolic process	biological_process	0.0711663	0.938879	1	278	4	16315	PFKFB1,PFKFB1
GO:0010886	positive regulation of cholesterol storage	biological_process	0.0711666	0.938879	1	278	4	16315	EHD1
GO:0010452	histone H3-K36 methylation	biological_process	0.0712382	0.938879	1	278	4	16315	SMYD2
GO:0043206	fibril organization	biological_process	0.0712923	0.938879	1	278	4	16315	COL3A1
GO:0070530	K63-linked polyubiquitin binding	molecular_function	0.0716008	0.939625	1	278	4	16315	TAB2
GO:0016286	small conductance calcium-activated potassium channel activity	molecular_function	0.0722371	0.944276	1	278	4	16315	KCNN1
GO:0050995	negative regulation of lipid catabolic process	biological_process	0.0722963	0.944276	1	278	5	16315	APOC3
GO:0018206	peptidyl-methionine modification	biological_process	0.0726686	0.947407	1	278	5	16315	APOA1
GO:0006635	fatty acid beta-oxidation	biological_process	0.0731402	0.952688	2	278	25	16315	ACADM,ACADM
GO:0000281	cytokinesis after mitosis	biological_process	0.0733596	0.954677	1	278	4	16315	ENSSSCG00000010212
GO:0048660	regulation of smooth muscle cell proliferation	biological_process	0.07363	0.956531	2	278	27	16315	BMP4
GO:0001190	RNA polymerase II transcription factor binding transcription factor activity involved in positive regulation of transcription	molecular_function	0.0736387	0.956531	2	278	27	16315	CREB,CREB,CREB,CREB,CREB,CREB
GO:0046068	cGMP metabolic process	biological_process	0.0737366	0.956531	2	278	26	16315	RORA
GO:0051856	adhesion to symbiont	biological_process	0.0746304	0.963325	1	278	4	16315	PRR2
GO:0050918	positive chemotaxis	biological_process	0.0753293	0.96972	2	278	27	16315	BMP4
GO:0045931	positive regulation of mitotic cell cycle	biological_process	0.0755551	0.97088	2	278	26	16315	EIF4EBP1,STAT5B
GO:0090184	positive regulation of kidney development	biological_process	0.0768741	0.981654	1	278	5	16315	BMP4
GO:0005518	collagen binding	molecular_function	0.0782887	0.993113	2	278	26	16315	HSD17B12,PCOLCE
GO:0060363	cranial suture morphogenesis	biological_process	0.0784138	0.993113	1	278	5	16315	BMP4
GO:0006509	membrane protein ectodomain proteolysis	biological_process	0.0785553	0.993366	2	278	27	16315	DAG1
GO:0046887	positive regulation of hormone secretion	biological_process	0.0786281	0.993409	2	278	27	16315	PTPN11,CREB,CREB,CREB,CREB,CREB,CREB
GO:0070244	negative regulation of thymocyte apoptosis	biological_process	0.0789243	0.993476	1	278	5	16315	BMP4
GO:0005783	endoplasmic reticulum	cellular_component	0.0789807	0.993476	14	278	520	16315	ZP2,MARCH2,SCD,NT5C3,RRS1
GO:0008179	adenylate cyclase binding	molecular_function	0.0791984	0.993842	1	278	5	16315	ADCY2
GO:0051000	positive regulation of nitric-oxide synthase activity	biological_process	0.0794778	0.996224	1	278	5	16315	APOE
GO:0016616	oxidoreductase activity, acting on the CH-OH group of donors, NAD or NADP as acceptor	molecular_function	0.0796045	0.996515	4	278	92	16315	GPD1,FAM213B,LDHA
GO:0034374	low-density lipoprotein particle remodeling	biological_process	0.0800118	0.996515	1	278	5	16315	APOE
GO:0048704	embryonic skeletal system morphogenesis	biological_process	0.080059	0.996515	3	278	62	16315	BMP4,TBX15,BMI1
GO:0010544	negative regulation of platelet activation	biological_process	0.0802583	0.996515	1	278	5	16315	APOE
GO:0015026	coreceptor activity	molecular_function	0.0803386	0.996515	1	278	5	16315	HFE2
GO:0006936	muscle contraction	biological_process	0.0803752	0.996515	4	278	92	16315	MYL1
GO:0070672	response to interleukin-15	biological_process	0.0804596	0.996515	1	278	5	16315	STAT5B
GO:0008016	regulation of heart contraction	biological_process	0.0805445	0.996515	3	278	57	16315	HBEGF
GO:0030154	cell differentiation	biological_process	0.0807722	0.996515	33	278	1481	16315	MYF5,MGP
GO:0042761	very long-chain fatty acid biosynthetic process	biological_process	0.0809453	0.996515	1	278	5	16315	TECR
GO:0046826	negative regulation of protein export from nucleus	biological_process	0.0809718	0.996515	1	278	5	16315	TXN
GO:0006986	response to unfolded protein	biological_process	0.0810339	0.996515	2	278	28	16315	DNAJB5
GO:0033085	negative regulation of T cell differentiation in thymus	biological_process	0.0811461	0.997037	1	278	5	16315	BMP4
GO:0016849	phosphorus-oxygen lyase activity	molecular_function	0.0817596	0.999566	2	278	26	16315	ADCY2,ADCY9
GO:0006561	proline biosynthetic process	biological_process	0.0819385	0.999566	1	278	5	16315	ALDH4A1
GO:2000096	positive regulation of Wnt receptor signaling pathway, planar cell polarity pathway	biological_process	0.0820377	0.999566	1	278	4	16315	MLLT3
GO:0006888	ER to Golgi vesicle-mediated transport	biological_process	0.0820422	0.999566	2	278	27	16315	LMF1,ANK1
GO:0051549	positive regulation of keratinocyte migration	biological_process	0.0820756	0.999566	1	278	5	16315	HBEGF
GO:0006469	negative regulation of protein kinase activity	biological_process	0.0821999	0.999679	4	278	94	16315	GADD45G
GO:0004312	fatty acid synthase activity	molecular_function	0.0825048	1	1	278	5	16315	FASN
GO:0070628	proteasome binding	molecular_function	0.0833386	1	1	278	5	16315	UBD,UBD
GO:0035278	negative regulation of translation involved in gene silencing by miRNA	biological_process	0.0836001	1	1	278	5	16315	EIF2C4
GO:0004722	protein serine/threonine phosphatase activity	molecular_function	0.0839195	1	2	278	27	16315	PPP1CB,MTMR3
GO:0008022	protein C-terminus binding	molecular_function	0.084027	1	4	278	93	16315	SLC9A3R2,FOXN3,VIM,MID1IP1
GO:0033270	paranode region of axon	cellular_component	0.0841758	1	1	278	5	16315	ENSSSCG00000017381
GO:0005765	lysosomal membrane	cellular_component	0.0842083	1	2	278	27	16315	SLA-DRA1,SCARB2
GO:0042582	azurophil granule	cellular_component	0.0842408	1	1	278	5	16315	SNAP23
GO:0007141	male meiosis I	biological_process	0.0845309	1	1	278	5	16315	HSPA2
GO:0031624	ubiquitin conjugating enzyme binding	molecular_function	0.0849228	1	1	278	5	16315	2023-03-06
GO:0060391	positive regulation of SMAD protein import into nucleus	biological_process	0.0852908	1	1	278	5	16315	BMP4
GO:0045579	positive regulation of B cell differentiation	biological_process	0.0854498	1	1	278	5	16315	STAT5B
GO:0016459	myosin complex	cellular_component	0.0859092	1	3	278	58	16315	MYL9,MYH1
GO:0016791	phosphatase activity	molecular_function	0.0861299	1	7	278	215	16315	PTPN11,NT5M,DUSP1,MTMR3
GO:0005638	lamin filament	cellular_component	0.0865742	1	1	278	5	16315	NARF
GO:0005509	calcium ion binding	molecular_function	0.0871474	1	15	278	576	16315	ANXA2,ANXA2,EHD1,MYL12B,G3PD,STAT5B,MYL1,MYL9,CASQ1,DAG1,S100A16,S100A16,S100A16,S100A16,S100A16,S100A16,ITGB1BP2,ENSSSCG00000023287,S100A10,S100A10,S100A10,S100A10,THBS2,MGP
GO:0048146	positive regulation of fibroblast proliferation	biological_process	0.087694	1	2	278	29	16315	BMI1,PDGFC
GO:0070938	contractile ring	cellular_component	0.0877829	1	1	278	5	16315	DAG1
GO:0032982	myosin filament	cellular_component	0.0880717	1	1	278	5	16315	MYH1
GO:0006000	fructose metabolic process	biological_process	0.0881405	1	1	278	5	16315	PFKFB1,PFKFB1
GO:0031957	very long-chain fatty acid-CoA ligase activity	molecular_function	0.0881429	1	1	278	5	16315	ACSL4
GO:0005587	collagen type IV	cellular_component	0.0882554	1	1	278	5	16315	COL4A2
GO:0019800	peptide cross-linking via chondroitin 4-sulfate glycosaminoglycan	biological_process	0.0883304	1	1	278	5	16315	BGN
GO:0007171	activation of transmembrane receptor protein tyrosine kinase activity	biological_process	0.0883646	1	1	278	5	16315	PDGFC
GO:0030300	regulation of intestinal cholesterol absorption	biological_process	0.0884099	1	1	278	6	16315	APOA1
GO:0016717	oxidoreductase activity, acting on paired donors, with oxidation of a pair of donors resulting in the reduction of molecular oxygen to two molecules of water	molecular_function	0.0884223	1	1	278	5	16315	SCD
GO:0004726	non-membrane spanning protein tyrosine phosphatase activity	molecular_function	0.0884303	1	1	278	5	16315	PTPN11
GO:0001675	acrosome assembly	biological_process	0.0884476	1	1	278	5	16315	PRR2
GO:0030199	collagen fibril organization	biological_process	0.0885077	1	2	278	28	16315	ANXA2,ANXA2,COL3A1
GO:0045086	positive regulation of interleukin-2 biosynthetic process	biological_process	0.0885253	1	1	278	5	16315	STAT5B
GO:0034341	response to interferon-gamma	biological_process	0.0887409	1	2	278	28	16315	UBD,UBD,SLA-DQA1
GO:0004438	phosphatidylinositol-3-phosphatase activity	molecular_function	0.0887619	1	1	278	5	16315	MTMR3
GO:0035137	hindlimb morphogenesis	biological_process	0.0891377	1	2	278	29	16315	ZBTB16
GO:0043589	skin morphogenesis	biological_process	0.0892015	1	1	278	5	16315	COL3A1
GO:0042326	negative regulation of phosphorylation	biological_process	0.0905816	1	5	278	137	16315	CDKN2C,BMP4
GO:0004459	L-lactate dehydrogenase activity	molecular_function	0.0907632	1	1	278	6	16315	LDHA
GO:0005915	zonula adherens	cellular_component	0.0909513	1	1	278	5	16315	PRR2
GO:0042487	regulation of odontogenesis of dentine-containing tooth	biological_process	0.0910514	1	1	278	6	16315	BMP4
GO:0005604	basement membrane	cellular_component	0.0912725	1	3	278	59	16315	COL4A2,DAG1,THBS2
GO:0035556	intracellular signal transduction	biological_process	0.0934351	1	30	278	1320	16315	ADCY2,ASB5,SPSB2,ADCY9
GO:0060433	bronchus development	biological_process	0.0951351	1	1	278	6	16315	BMP4
GO:0048741	skeletal muscle fiber development	biological_process	0.0951895	1	3	278	62	16315	RCAN1
GO:0006707	cholesterol catabolic process	biological_process	0.0958888	1	1	278	6	16315	APOE
GO:0003956	NAD(P)+-protein-arginine ADP-ribosyltransferase activity	molecular_function	0.0969344	1	1	278	6	16315	ART3
GO:0005925	focal adhesion	cellular_component	0.0970016	1	3	278	61	16315	RDX,SORBS1,PGM5
GO:0060502	epithelial cell proliferation involved in lung morphogenesis	biological_process	0.0972684	1	1	278	6	16315	BMP4
GO:0060235	lens induction in camera-type eye	biological_process	0.0977276	1	1	278	6	16315	BMP4
GO:0030497	fatty acid elongation	biological_process	0.0978758	1	1	278	6	16315	TECR
GO:0021978	telencephalon regionalization	biological_process	0.098096	1	1	278	6	16315	BMP4
GO:0090303	positive regulation of wound healing	biological_process	0.0982216	1	1	278	6	16315	HBEGF
GO:0045885	positive regulation of survival gene product expression	biological_process	0.0983707	1	1	278	6	16315	STAT5B
GO:0030218	erythrocyte differentiation	biological_process	0.0984331	1	3	278	63	16315	BMP4
GO:0060687	regulation of branching involved in prostate gland morphogenesis	biological_process	0.0986992	1	1	278	6	16315	BMP4
GO:0060684	epithelial-mesenchymal cell signaling	biological_process	0.0990273	1	1	278	6	16315	BMP4
GO:0030173	integral to Golgi membrane	cellular_component	0.0994862	1	2	278	30	16315	ST3GAL1,ST3GAL1,SIAT7B
GO:0014067	negative regulation of phosphatidylinositol 3-kinase cascade	biological_process	0.100332	1	1	278	6	16315	SLC9A3R2
GO:0060272	embryonic skeletal joint morphogenesis	biological_process	0.100526	1	1	278	6	16315	BMP4
GO:0072205	metanephric collecting duct development	biological_process	0.100961	1	1	278	6	16315	BMP4
GO:0043498	cell surface binding	molecular_function	0.101093	1	2	278	31	16315	PDGFC
GO:0051920	peroxiredoxin activity	molecular_function	0.102156	1	1	278	6	16315	PARK7
GO:0051428	peptide hormone receptor binding	molecular_function	0.102926	1	1	278	7	16315	PTPN11
GO:0070208	protein heterotrimerization	biological_process	0.103253	1	1	278	6	16315	COL6A2
GO:0043508	negative regulation of JUN kinase activity	biological_process	0.103672	1	1	278	6	16315	HIPK3
GO:0043517	positive regulation of DNA damage response, signal transduction by p53 class mediator	biological_process	0.103931	1	1	278	6	16315	ANKRD1
GO:0002860	positive regulation of natural killer cell mediated cytotoxicity directed against tumor cell target	biological_process	0.104172	1	1	278	6	16315	PRR2
GO:0000993	RNA polymerase II core binding	molecular_function	0.104212	1	1	278	6	16315	SMYD2
GO:0032456	endocytic recycling	biological_process	0.10428	1	1	278	6	16315	EHD1
GO:0032825	positive regulation of natural killer cell differentiation	biological_process	0.104372	1	1	278	6	16315	STAT5B
GO:0031668	cellular response to extracellular stimulus	biological_process	0.104396	1	4	278	101	16315	FOS,LDHA
GO:0071391	cellular response to estrogen stimulus	biological_process	0.104488	1	1	278	6	16315	TRIM24
GO:0070577	histone acetyl-lysine binding	molecular_function	0.104566	1	1	278	6	16315	TRIM24
GO:0051654	establishment of mitochondrion localization	biological_process	0.104685	1	1	278	6	16315	PRR2
GO:0035313	wound healing, spreading of epidermal cells	biological_process	0.104733	1	1	278	6	16315	HBEGF
GO:0034505	tooth mineralization	biological_process	0.104762	1	1	278	6	16315	COL3A1
GO:0070102	interleukin-6-mediated signaling pathway	biological_process	0.105051	1	1	278	6	16315	GAB1
GO:0017046	peptide hormone binding	molecular_function	0.105162	1	1	278	6	16315	GHR
GO:0071564	npBAF complex	cellular_component	0.1053	1	1	278	6	16315	SMARCD3
GO:0005161	platelet-derived growth factor receptor binding	molecular_function	0.105482	1	1	278	6	16315	PDGFC
GO:0005747	mitochondrial respiratory chain complex I	cellular_component	0.10561	1	2	278	33	16315	MT-ND5,NADH4
GO:0048565	digestive tract development	biological_process	0.106082	1	3	278	66	16315	COL3A1
GO:0006414	translational elongation	biological_process	0.106163	1	2	278	34	16315	EEF1A
GO:0048286	lung alveolus development	biological_process	0.106559	1	2	278	32	16315	PKDCC,BMP4
GO:0007173	epidermal growth factor receptor signaling pathway	biological_process	0.107515	1	2	278	32	16315	GAB1,HBEGF
GO:0006898	receptor-mediated endocytosis	biological_process	0.107826	1	3	278	65	16315	APOE
GO:0021983	pituitary gland development	biological_process	0.108126	1	2	278	33	16315	CREB,CREB,CREB,CREB,CREB,CREB,BMP4
GO:0045176	apical protein localization	biological_process	0.108167	1	1	278	6	16315	RDX
GO:0006897	endocytosis	biological_process	0.108734	1	6	278	183	16315	EHD1
GO:0030507	spectrin binding	molecular_function	0.108946	1	1	278	6	16315	ANK1
GO:0045603	positive regulation of endothelial cell differentiation	biological_process	0.108981	1	1	278	7	16315	BMP4
GO:0016279	protein-lysine N-methyltransferase activity	molecular_function	0.109085	1	2	278	31	16315	SETD7,SMYD2
GO:0018024	histone-lysine N-methyltransferase activity	molecular_function	0.109085	1	2	278	31	16315	SETD7
GO:0001516	prostaglandin biosynthetic process	biological_process	0.109249	1	1	278	7	16315	FAM213B
GO:0006120	mitochondrial electron transport, NADH to ubiquinone	biological_process	0.109398	1	1	278	7	16315	NADH4
GO:0060711	labyrinthine layer development	biological_process	0.110137	1	2	278	33	16315	GAB1
GO:0043011	myeloid dendritic cell differentiation	biological_process	0.110363	1	1	278	7	16315	UBD,UBD
GO:0051393	alpha-actinin binding	molecular_function	0.110492	1	1	278	6	16315	DAG1
GO:0035025	positive regulation of Rho protein signal transduction	biological_process	0.110567	1	1	278	7	16315	ABRA
GO:0019886	antigen processing and presentation of exogenous peptide antigen via MHC class II	biological_process	0.110778	1	1	278	7	16315	SLA-DQA1
GO:0010880	regulation of release of sequestered calcium ion into cytosol by sarcoplasmic reticulum	biological_process	0.111052	1	1	278	6	16315	CASQ1
GO:0000506	glycosylphosphatidylinositol-N-acetylglucosaminyltransferase (GPI-GnT) complex	cellular_component	0.111505	1	1	278	7	16315	PIGY
GO:0051216	cartilage development	biological_process	0.111534	1	4	278	106	16315	ZBTB16,MGP
GO:0045662	negative regulation of myoblast differentiation	biological_process	0.111636	1	1	278	7	16315	BMP4
GO:0032967	positive regulation of collagen biosynthetic process	biological_process	0.111688	1	1	278	7	16315	BMP4
GO:0012501	programmed cell death	biological_process	0.111708	1	18	278	756	16315	PKM2
GO:0001501	skeletal system development	biological_process	0.111917	1	7	278	236	16315	COL3A1,BMP4,BMI1,ZBTB16
GO:0001609	G-protein coupled adenosine receptor activity	molecular_function	0.111947	1	1	278	7	16315	ADORA1
GO:0009952	anterior/posterior pattern specification	biological_process	0.112152	1	5	278	152	16315	MLLT3,ZBTB16
GO:0006950	response to stress	biological_process	0.113222	1	28	278	1264	16315	HSPB3,TP53INP1,PARK7,GADD45G
GO:0031362	anchored to external side of plasma membrane	cellular_component	0.11398	1	1	278	7	16315	CD59
GO:0001973	adenosine receptor signaling pathway	biological_process	0.114014	1	1	278	7	16315	ADORA1
GO:0045947	negative regulation of translational initiation	biological_process	0.114285	1	1	278	7	16315	EIF4EBP1
GO:0048541	Peyer's patch development	biological_process	0.114708	1	1	278	7	16315	STAT5B
GO:0006913	nucleocytoplasmic transport	biological_process	0.115824	1	6	278	189	16315	MLXIP
GO:0046697	decidualization	biological_process	0.115981	1	1	278	8	16315	JUNB
GO:0035497	cAMP response element binding	molecular_function	0.116059	1	1	278	7	16315	CREB,CREB,CREB,CREB,CREB,CREB
GO:0009299	mRNA transcription	biological_process	0.116251	1	1	278	7	16315	HIPK3
GO:0043064	flagellum organization	biological_process	0.116767	1	1	278	7	16315	PRR2
GO:0045647	negative regulation of erythrocyte differentiation	biological_process	0.116968	1	1	278	7	16315	STAT5B
GO:0018279	protein N-linked glycosylation via asparagine	biological_process	0.117114	1	1	278	7	16315	DDOST
GO:0001553	luteinization	biological_process	0.117444	1	1	278	7	16315	STAT5B
GO:0005759	mitochondrial matrix	cellular_component	0.117861	1	3	278	69	16315	ACADL,ACADM,ALDH4A1
GO:0008354	germ cell migration	biological_process	0.118058	1	1	278	7	16315	CXCL12
GO:0034504	protein localization to nucleus	biological_process	0.11916	1	5	278	147	16315	COL3A1,BMP4
GO:0043220	Schmidt-Lanterman incisure	cellular_component	0.119183	1	1	278	7	16315	ANXA2,ANXA2
GO:0070670	response to interleukin-4	biological_process	0.119215	1	1	278	7	16315	STAT5B
GO:0006417	regulation of translation	biological_process	0.119293	1	4	278	107	16315	ZFP36L1
GO:0035257	nuclear hormone receptor binding	molecular_function	0.119512	1	3	278	68	16315	SMARCD3
GO:0045582	positive regulation of T cell differentiation	biological_process	0.119581	1	2	278	34	16315	SLA-DQA1
GO:0071356	cellular response to tumor necrosis factor	biological_process	0.119756	1	2	278	35	16315	ANKRD1
GO:0019861	flagellum	cellular_component	0.119861	1	2	278	34	16315	PKM2,LDHA
GO:0030955	potassium ion binding	molecular_function	0.119983	1	1	278	8	16315	PKM2
GO:0021702	cerebellar Purkinje cell differentiation	biological_process	0.120257	1	1	278	7	16315	RORA
GO:0006910	phagocytosis, recognition	biological_process	0.120696	1	1	278	7	16315	MFGE8
GO:0042581	specific granule	cellular_component	0.12075	1	1	278	7	16315	SNAP23
GO:0030175	filopodium	cellular_component	0.120819	1	2	278	34	16315	RDX,DAG1
GO:0006525	arginine metabolic process	biological_process	0.120916	1	1	278	7	16315	ARG2
GO:0072659	protein localization in plasma membrane	biological_process	0.121061	1	2	278	34	16315	ENSSSCG00000010212
GO:0006874	cellular calcium ion homeostasis	biological_process	0.121898	1	4	278	107	16315	SLC37A4,APOE,PLN
GO:0035371	microtubule plus end	cellular_component	0.123315	1	1	278	7	16315	CLIP1
GO:0000287	magnesium ion binding	molecular_function	0.124775	1	5	278	148	16315	ENO3,ADPRHL1,PKM2,NT5C3,PGM5
GO:0042060	wound healing	biological_process	0.125217	1	5	278	149	16315	COL3A1
GO:0051861	glycolipid binding	molecular_function	0.125664	1	1	278	8	16315	HSPA2
GO:0090026	positive regulation of monocyte chemotaxis	biological_process	0.126101	1	1	278	8	16315	CXCL12
GO:0031032	actomyosin structure organization	biological_process	0.126606	1	2	278	35	16315	CNN1
GO:0046543	development of secondary female sexual characteristics	biological_process	0.128081	1	1	278	8	16315	STAT5B
GO:0050884	neuromuscular process controlling posture	biological_process	0.12869	1	1	278	8	16315	ENSSSCG00000017381
GO:0005667	transcription factor complex	cellular_component	0.128792	1	6	278	196	16315	FOS,CREB,CREB,CREB,CREB,CREB,CREB,CREB,ANKRD1,CREG1,NR4A1,ATF5
GO:0055008	cardiac muscle tissue morphogenesis	biological_process	0.128819	1	2	278	36	16315	ANKRD1
GO:0035767	endothelial cell chemotaxis	biological_process	0.128845	1	1	278	8	16315	NR4A1
GO:0050662	coenzyme binding	molecular_function	0.130189	1	5	278	149	16315	GPD1
GO:0005198	structural molecule activity	molecular_function	0.130496	1	11	278	467	16315	SYNM,VIM,ENSSSCG00000005381
GO:0007379	segment specification	biological_process	0.130854	1	1	278	8	16315	MLLT3
GO:0004017	adenylate kinase activity	molecular_function	0.13187	1	1	278	8	16315	AK1
GO:0016783	sulfurtransferase activity	molecular_function	0.132131	1	1	278	8	16315	URM1
GO:0045822	negative regulation of heart contraction	biological_process	0.132309	1	1	278	8	16315	PLN
GO:0045638	negative regulation of myeloid cell differentiation	biological_process	0.13268	1	2	278	38	16315	ZBTB16
GO:0008285	negative regulation of cell proliferation	biological_process	0.132739	1	8	278	286	16315	CDKN2C,CMYA1,TP53INP1,BMP4,TRIM24,SMYD2,ZBTB16
GO:0016874	ligase activity	molecular_function	0.132778	1	9	278	327	16315	ACSL4
GO:0000042	protein targeting to Golgi	biological_process	0.132923	1	1	278	8	16315	GOLGA4,GOLGA4
GO:0070307	lens fiber cell development	biological_process	0.133052	1	1	278	8	16315	VIM
GO:0007179	transforming growth factor beta receptor signaling pathway	biological_process	0.133285	1	3	278	72	16315	FOS,COL3A1
GO:0009190	cyclic nucleotide biosynthetic process	biological_process	0.133356	1	3	278	75	16315	ADCY2,ADCY9
GO:0055091	phospholipid homeostasis	biological_process	0.133789	1	1	278	8	16315	APOA1
GO:0048407	platelet-derived growth factor binding	molecular_function	0.133838	1	1	278	8	16315	COL3A1
GO:0003705	sequence-specific distal enhancer binding RNA polymerase II transcription factor activity	molecular_function	0.134131	1	2	278	37	16315	BHLHE41,BHLHE40
GO:0007520	myoblast fusion	biological_process	0.134718	1	1	278	8	16315	DYRK1B
GO:0030054	cell junction	cellular_component	0.134936	1	9	278	329	16315	CMYA1
GO:0060425	lung morphogenesis	biological_process	0.135333	1	2	278	39	16315	BMP4
GO:0003337	mesenchymal to epithelial transition involved in metanephros morphogenesis	biological_process	0.136582	1	1	278	9	16315	BMP4
GO:0003014	renal system process	biological_process	0.136789	1	2	278	37	16315	BMP4
GO:0004579	dolichyl-diphosphooligosaccharide-protein glycotransferase activity	molecular_function	0.137116	1	1	278	8	16315	DDOST
GO:0071565	nBAF complex	cellular_component	0.137244	1	1	278	8	16315	SMARCD3
GO:0005388	calcium-transporting ATPase activity	molecular_function	0.137737	1	1	278	8	16315	ATP2B1
GO:0046856	phosphatidylinositol dephosphorylation	biological_process	0.138022	1	1	278	8	16315	MTMR3
GO:0007289	spermatid nucleus differentiation	biological_process	0.138853	1	1	278	9	16315	PRR2
GO:0043086	negative regulation of catalytic activity	biological_process	0.139167	1	8	278	294	16315	WDTC1
GO:0033005	positive regulation of mast cell activation	biological_process	0.139932	1	1	278	9	16315	PRR2
GO:0051044	positive regulation of membrane protein ectodomain proteolysis	biological_process	0.140575	1	1	278	9	16315	APOE
GO:0060081	membrane hyperpolarization	biological_process	0.140589	1	1	278	8	16315	PARK7
GO:0005977	glycogen metabolic process	biological_process	0.140842	1	2	278	38	16315	SLC37A4
GO:0008219	cell death	biological_process	0.143094	1	18	278	785	16315	TNFRSF12A
GO:0070742	C2H2 zinc finger domain binding	molecular_function	0.143453	1	1	278	9	16315	ZXDC
GO:0008430	selenium binding	molecular_function	0.14374	1	1	278	9	16315	SEPW1
GO:0030863	cortical cytoskeleton	cellular_component	0.144181	1	2	278	38	16315	GYPC,ANK1
GO:0070723	response to cholesterol	biological_process	0.144676	1	1	278	9	16315	PMVK
GO:0016525	negative regulation of angiogenesis	biological_process	0.144752	1	2	278	38	16315	COL4A2,THBS2
GO:0070688	MLL5-L complex	cellular_component	0.145648	1	1	278	9	16315	PPP1CB
GO:0042254	ribosome biogenesis	biological_process	0.146583	1	3	278	78	16315	RSL24D1,RRS1
GO:0006337	nucleosome disassembly	biological_process	0.146979	1	1	278	9	16315	SMARCD3
GO:0030315	T-tubule	cellular_component	0.147169	1	1	278	8	16315	CACNB1
GO:0042100	B cell proliferation	biological_process	0.147803	1	2	278	39	16315	SHB
GO:0006402	mRNA catabolic process	biological_process	0.148006	1	2	278	39	16315	EIF2C4
GO:0031116	positive regulation of microtubule polymerization	biological_process	0.148037	1	1	278	9	16315	CLIP1
GO:0030424	axon	cellular_component	0.148218	1	4	278	113	16315	ACADM,ENSSSCG00000010212
GO:0014002	astrocyte development	biological_process	0.148453	1	1	278	9	16315	VIM
GO:0009409	response to cold	biological_process	0.149319	1	1	278	10	16315	ACADM
GO:0005626	insoluble fraction	cellular_component	0.149531	1	1	278	9	16315	DAG1
GO:0003746	translation elongation factor activity	molecular_function	0.149823	1	1	278	10	16315	EEF1A
GO:0030194	positive regulation of blood coagulation	biological_process	0.150099	1	1	278	9	16315	NFE2L2
GO:0006103	2-oxoglutarate metabolic process	biological_process	0.150686	1	1	278	9	16315	STAT5B
GO:0001968	fibronectin binding	molecular_function	0.151042	1	1	278	9	16315	HSD17B12
GO:0033158	regulation of protein import into nucleus, translocation	biological_process	0.151086	1	1	278	9	16315	TXN
GO:0016829	lyase activity	molecular_function	0.151171	1	4	278	116	16315	ADCY2,ADCY9
GO:0060592	mammary gland formation	biological_process	0.15229	1	1	278	9	16315	BMP4
GO:0021903	rostrocaudal neural tube patterning	biological_process	0.152351	1	1	278	10	16315	BMI1
GO:0004707	MAP kinase activity	molecular_function	0.153413	1	1	278	9	16315	MAPK6
GO:0003323	type B pancreatic cell development	biological_process	0.153933	1	1	278	10	16315	BMP4
GO:0045786	negative regulation of cell cycle	biological_process	0.154382	1	6	278	207	16315	BMP4
GO:0005856	cytoskeleton	cellular_component	0.15565	1	22	278	980	16315	RDX,LMOD3,CNN1
GO:0051150	regulation of smooth muscle cell differentiation	biological_process	0.156113	1	1	278	10	16315	BMP4
GO:0030155	regulation of cell adhesion	biological_process	0.157255	1	5	278	160	16315	STAT5B,PPP1CB
GO:0060216	definitive hemopoiesis	biological_process	0.15799	1	1	278	10	16315	LYL1
GO:0050930	induction of positive chemotaxis	biological_process	0.158459	1	1	278	10	16315	CXCL12
GO:0006915	apoptosis	biological_process	0.158897	1	17	278	748	16315	TP53INP1,NR4A1
GO:0002686	negative regulation of leukocyte migration	biological_process	0.160067	1	1	278	10	16315	ADORA1
GO:0030275	LRR domain binding	molecular_function	0.160093	1	1	278	10	16315	ZXDC
GO:0022604	regulation of cell morphogenesis	biological_process	0.160334	1	5	278	163	16315	CAMSAP1
GO:0042730	fibrinolysis	biological_process	0.160464	1	1	278	10	16315	ANXA2,ANXA2
GO:0016011	dystroglycan complex	cellular_component	0.160471	1	1	278	10	16315	DAG1
GO:0030225	macrophage differentiation	biological_process	0.161721	1	1	278	11	16315	BMP4
GO:0032435	negative regulation of proteasomal ubiquitin-dependent protein catabolic process	biological_process	0.161946	1	1	278	10	16315	N4BP1
GO:0031432	titin binding	molecular_function	0.162092	1	1	278	10	16315	ANKRD1
GO:0032331	negative regulation of chondrocyte differentiation	biological_process	0.162233	1	1	278	10	16315	BMP4
GO:0007080	mitotic metaphase plate congression	biological_process	0.162512	1	1	278	10	16315	RRS1
GO:0045773	positive regulation of axon extension	biological_process	0.162745	1	1	278	10	16315	TNFRSF12A
GO:0001525	angiogenesis	biological_process	0.162754	1	6	278	211	16315	ANXA2,ANXA2,BMP4
GO:0060053	neurofilament cytoskeleton	cellular_component	0.162948	1	1	278	10	16315	SYNM
GO:0008134	transcription factor binding	molecular_function	0.163151	1	7	278	255	16315	SMARCD3,CREG1
GO:0005764	lysosome	cellular_component	0.163156	1	4	278	121	16315	SLA-DRA1,SCARB2,SLA-DQA1
GO:0045621	positive regulation of lymphocyte differentiation	biological_process	0.163357	1	2	278	41	16315	STAT5B
GO:0001106	RNA polymerase II transcription corepressor activity	molecular_function	0.16413	1	1	278	10	16315	TBX15
GO:0005523	tropomyosin binding	molecular_function	0.164499	1	1	278	10	16315	LMOD3
GO:0030307	positive regulation of cell growth	biological_process	0.164896	1	2	278	42	16315	ACSL4
GO:0008076	voltage-gated potassium channel complex	cellular_component	0.164907	1	2	278	45	16315	KCNA7,ENSSSCG00000017381
GO:0030139	endocytic vesicle	cellular_component	0.165419	1	2	278	41	16315	EHD1,APOA1
GO:0031902	late endosome membrane	cellular_component	0.165565	1	1	278	10	16315	SLA-DRA1
GO:0042104	positive regulation of activated T cell proliferation	biological_process	0.166042	1	1	278	10	16315	STAT5B
GO:0051443	positive regulation of ubiquitin-protein ligase activity	biological_process	0.166302	1	1	278	10	16315	BMI1
GO:0001673	male germ cell nucleus	cellular_component	0.166358	1	1	278	11	16315	HSPA2
GO:0045730	respiratory burst	biological_process	0.16675	1	1	278	10	16315	SLC37A4
GO:0002320	lymphoid progenitor cell differentiation	biological_process	0.166761	1	1	278	11	16315	BMP4
GO:0005882	intermediate filament	cellular_component	0.166846	1	3	278	84	16315	SYNM,VIM
GO:0005504	fatty acid binding	molecular_function	0.167575	1	1	278	10	16315	ALB
GO:0005916	fascia adherens	cellular_component	0.168096	1	1	278	10	16315	CMYA1
GO:0015101	organic cation transmembrane transporter activity	molecular_function	0.168652	1	1	278	10	16315	SLC7A8,SLC7A8
GO:0005212	structural constituent of eye lens	molecular_function	0.169397	1	1	278	11	16315	VIM
GO:0030856	regulation of epithelial cell differentiation	biological_process	0.170014	1	2	278	43	16315	STAT5B
GO:0015485	cholesterol binding	molecular_function	0.170088	1	1	278	11	16315	APOA1
GO:0004016	adenylate cyclase activity	molecular_function	0.170331	1	1	278	10	16315	ADCY2
GO:0002891	positive regulation of immunoglobulin mediated immune response	biological_process	0.170462	1	1	278	11	16315	PRR2
GO:0019825	oxygen binding	molecular_function	0.171915	1	1	278	12	16315	ALB
GO:0002021	response to dietary excess	biological_process	0.173045	1	1	278	12	16315	APOE
GO:0003007	heart morphogenesis	biological_process	0.173202	1	4	278	124	16315	SMARCD3
GO:0009967	positive regulation of signal transduction	biological_process	0.174247	1	11	278	454	16315	PTPN11
GO:0005771	multivesicular body	cellular_component	0.174356	1	1	278	11	16315	ZP2
GO:0050750	low-density lipoprotein particle receptor binding	molecular_function	0.174426	1	1	278	11	16315	APOE
GO:0035102	PRC1 complex	cellular_component	0.174613	1	1	278	11	16315	BMI1
GO:0007050	cell cycle arrest	biological_process	0.175004	1	5	278	170	16315	CDKN2C,AK1,TP53INP1,CDKN1A
GO:0090200	positive regulation of release of cytochrome c from mitochondria	biological_process	0.175254	1	1	278	11	16315	MLLT11
GO:0007010	cytoskeleton organization	biological_process	0.175442	1	12	278	499	16315	CAMSAP1,PRR2,SH3KBP1,ENSSSCG00000017381
GO:0000288	nuclear-transcribed mRNA catabolic process, deadenylation-dependent decay	biological_process	0.175858	1	1	278	11	16315	ZFP36L1
GO:0043537	negative regulation of blood vessel endothelial cell migration	biological_process	0.176696	1	1	278	11	16315	APOE
GO:0006111	regulation of gluconeogenesis	biological_process	0.177097	1	1	278	11	16315	ACADM
GO:0005246	calcium channel regulator activity	molecular_function	0.177346	1	1	278	11	16315	PLN
GO:0031672	A band	cellular_component	0.178815	1	1	278	11	16315	MYH1
GO:0000980	RNA polymerase II distal enhancer sequence-specific DNA binding	molecular_function	0.179327	1	1	278	11	16315	CREB,CREB,CREB,CREB,CREB,CREB
GO:0031901	early endosome membrane	cellular_component	0.179689	1	1	278	11	16315	EHD1
GO:0046965	retinoid X receptor binding	molecular_function	0.180064	1	1	278	11	16315	NR1H2
GO:0071108	protein K48-linked deubiquitination	biological_process	0.180081	1	1	278	11	16315	USP25
GO:0010181	FMN binding	molecular_function	0.180692	1	1	278	11	16315	CREG1
GO:0009055	electron carrier activity	molecular_function	0.180795	1	4	278	130	16315	CYP4F55,TXN,MT-CO1,HMOX2
GO:0017053	transcriptional repressor complex	cellular_component	0.181549	1	2	278	43	16315	ZBTB16
GO:0000794	condensed nuclear chromosome	cellular_component	0.181648	1	2	278	44	16315	RRS1
GO:0004806	triglyceride lipase activity	molecular_function	0.181712	1	1	278	11	16315	LIPE
GO:0045843	negative regulation of striated muscle tissue development	biological_process	0.181715	1	1	278	12	16315	BMP4
GO:0032420	stereocilium	cellular_component	0.181943	1	1	278	11	16315	RDX
GO:0017017	MAP kinase tyrosine/serine/threonine phosphatase activity	molecular_function	0.182177	1	1	278	13	16315	DUSP1
GO:0006911	phagocytosis, engulfment	biological_process	0.183285	1	1	278	11	16315	MFGE8
GO:0006656	phosphatidylcholine biosynthetic process	biological_process	0.186314	1	1	278	12	16315	APOA1
GO:0032869	cellular response to insulin stimulus	biological_process	0.187391	1	2	278	45	16315	WDTC1
GO:0030325	adrenal gland development	biological_process	0.187552	1	1	278	12	16315	APOA1
GO:0045109	intermediate filament organization	biological_process	0.187938	1	1	278	12	16315	VIM
GO:0005516	calmodulin binding	molecular_function	0.188721	1	2	278	45	16315	KCNN1,CNN1
GO:0030183	B cell differentiation	biological_process	0.189449	1	2	278	46	16315	LYL1
GO:0001503	ossification	biological_process	0.189865	1	5	278	176	16315	MGP
GO:0001963	synaptic transmission, dopaminergic	biological_process	0.189885	1	1	278	12	16315	PARK7
GO:0060438	trachea development	biological_process	0.190572	1	1	278	12	16315	BMP4
GO:0022011	myelination in peripheral nervous system	biological_process	0.192142	1	1	278	12	16315	DAG1
GO:0006662	glycerol ether metabolic process	biological_process	0.192804	1	1	278	12	16315	TXN
GO:0016868	intramolecular transferase activity, phosphotransferases	molecular_function	0.194018	1	1	278	12	16315	PGM5
GO:0046676	negative regulation of insulin secretion	biological_process	0.195093	1	1	278	13	16315	PTPN11
GO:0043236	laminin binding	molecular_function	0.195327	1	1	278	12	16315	BCAM
GO:0030335	positive regulation of cell migration	biological_process	0.195816	1	4	278	132	16315	CXCL12,COL3A1,HBEGF
GO:0000165	MAPKKK cascade	biological_process	0.195955	1	8	278	318	16315	MAPK6
GO:0048821	erythrocyte development	biological_process	0.195967	1	1	278	13	16315	ANK1
GO:0016813	hydrolase activity, acting on carbon-nitrogen (but not peptide) bonds, in linear amidines	molecular_function	0.195984	1	1	278	12	16315	ARG2
GO:0001786	phosphatidylserine binding	molecular_function	0.197993	1	1	278	12	16315	MFGE8
GO:0031966	mitochondrial membrane	cellular_component	0.198047	1	7	278	277	16315	RNF144B,SLC25A32,NADH4,PLN
GO:0010977	negative regulation of neuron projection development	biological_process	0.19833	1	1	278	12	16315	VIM
GO:0015695	organic cation transport	biological_process	0.198878	1	1	278	12	16315	SLC7A8,SLC7A8
GO:0005794	Golgi apparatus	cellular_component	0.199269	1	12	278	517	16315	PKDCC,ST3GAL1,ST3GAL1,RDX,GOLGA4,SNAP23,ZP2,LMF1,BHLHE40,SIAT7B,STX16,STX16,STX16,STX16,STX16,ZDHHC9
GO:0051117	ATPase binding	molecular_function	0.200836	1	1	278	13	16315	ANK1
GO:0042325	regulation of phosphorylation	biological_process	0.201121	1	12	278	520	16315	PPP1R14C
GO:2000379	positive regulation of reactive oxygen species metabolic process	biological_process	0.201615	1	1	278	13	16315	NFE2L2
GO:0042056	chemoattractant activity	molecular_function	0.203122	1	1	278	14	16315	BMP4
GO:0010718	positive regulation of epithelial to mesenchymal transition	biological_process	0.203208	1	1	278	13	16315	COL3A1
GO:0060442	branching involved in prostate gland morphogenesis	biological_process	0.203512	1	1	278	13	16315	BMP4
GO:0060716	labyrinthine layer blood vessel development	biological_process	0.203799	1	1	278	13	16315	JUNB
GO:0007026	negative regulation of microtubule depolymerization	biological_process	0.206116	1	1	278	13	16315	MID1IP1
GO:0002026	regulation of the force of heart contraction	biological_process	0.207743	1	1	278	13	16315	PLN
GO:0009306	protein secretion	biological_process	0.208114	1	3	278	90	16315	LMF1
GO:0043030	regulation of macrophage activation	biological_process	0.208899	1	1	278	13	16315	RORA
GO:0016235	aggresome	cellular_component	0.210177	1	1	278	13	16315	UBD,UBD
GO:0032270	positive regulation of cellular protein metabolic process	biological_process	0.210462	1	10	278	424	16315	NR1H2
GO:0070536	protein K63-linked deubiquitination	biological_process	0.210465	1	1	278	13	16315	USP25
GO:0009925	basal plasma membrane	cellular_component	0.210556	1	1	278	13	16315	ENSSSCG00000010212
GO:0002052	positive regulation of neuroblast proliferation	biological_process	0.210957	1	1	278	13	16315	SMARCD3
GO:0006171	cAMP biosynthetic process	biological_process	0.212652	1	2	278	52	16315	ADCY2,ADCY9
GO:0008211	glucocorticoid metabolic process	biological_process	0.213536	1	1	278	14	16315	APOA1
GO:0010761	fibroblast migration	biological_process	0.213737	1	1	278	13	16315	TNS1
GO:0001829	trophectodermal cell differentiation	biological_process	0.214	1	1	278	14	16315	JUNB
GO:0048333	mesodermal cell differentiation	biological_process	0.214208	1	1	278	15	16315	BMP4
GO:0035924	cellular response to vascular endothelial growth factor stimulus	biological_process	0.215404	1	1	278	14	16315	NR4A1
GO:0016607	nuclear speck	cellular_component	0.216706	1	2	278	49	16315	PNN,ZBTB16
GO:0045768	positive regulation of anti-apoptosis	biological_process	0.217151	1	1	278	14	16315	RNF144B
GO:0060765	regulation of androgen receptor signaling pathway	biological_process	0.217448	1	1	278	14	16315	PARK7
GO:0001932	regulation of protein phosphorylation	biological_process	0.217792	1	11	278	479	16315	APOA1
GO:0030212	hyaluronan metabolic process	biological_process	0.217952	1	1	278	14	16315	ITIH5
GO:0009790	embryo development	biological_process	0.218757	1	14	278	639	16315	TPM1
GO:0014044	Schwann cell development	biological_process	0.219555	1	1	278	14	16315	DAG1
GO:0051898	negative regulation of protein kinase B signaling cascade	biological_process	0.220117	1	1	278	14	16315	DAG1
GO:0048103	somatic stem cell division	biological_process	0.220374	1	1	278	14	16315	BMI1
GO:0042743	hydrogen peroxide metabolic process	biological_process	0.220494	1	1	278	14	16315	PARK7
GO:0033687	osteoblast proliferation	biological_process	0.22332	1	1	278	15	16315	JUNB
GO:0031941	filamentous actin	cellular_component	0.223792	1	1	278	14	16315	TPM1
GO:0005911	cell-cell junction	cellular_component	0.224061	1	5	278	183	16315	PRR2
GO:0001570	vasculogenesis	biological_process	0.224066	1	2	278	51	16315	JUNB,ZFP36L1
GO:0019901	protein kinase binding	molecular_function	0.224312	1	6	278	230	16315	CDKN2C,SORBS1,PPP1CB,LIPE,MAPK6,EEF1A
GO:0015269	calcium-activated potassium channel activity	molecular_function	0.224454	1	1	278	14	16315	KCNN1
GO:0007140	male meiosis	biological_process	0.225119	1	1	278	14	16315	HSPA2
GO:0005097	Rab GTPase activator activity	molecular_function	0.225561	1	2	278	49	16315	ADPRHL1,TBC1D20
GO:0032851	positive regulation of Rab GTPase activity	biological_process	0.225561	1	2	278	49	16315	ADPRHL1,TBC1D20
GO:0003713	transcription coactivator activity	molecular_function	0.226184	1	4	278	140	16315	ABRA,DYRK1B
GO:0001676	long-chain fatty acid metabolic process	biological_process	0.226908	1	1	278	14	16315	ACSL4
GO:0048812	neuron projection morphogenesis	biological_process	0.227591	1	6	278	233	16315	ENSSSCG00000017381
GO:0000079	regulation of cyclin-dependent protein kinase activity	biological_process	0.229153	1	2	278	53	16315	CDKN2C
GO:0031252	cell leading edge	cellular_component	0.230089	1	4	278	135	16315	VIM
GO:0034968	histone lysine methylation	biological_process	0.230518	1	2	278	50	16315	SETD7
GO:0043005	neuron projection	cellular_component	0.230633	1	6	278	228	16315	SNAP23
GO:0030879	mammary gland development	biological_process	0.231087	1	3	278	94	16315	CREB,CREB,CREB,CREB,CREB,CREB
GO:0070301	cellular response to hydrogen peroxide	biological_process	0.23128	1	1	278	15	16315	PARK7
GO:0032313	regulation of Rab GTPase activity	biological_process	0.232333	1	2	278	50	16315	ADPRHL1,TBC1D20
GO:0043462	regulation of ATPase activity	biological_process	0.232381	1	1	278	15	16315	TPM2
GO:0030176	integral to endoplasmic reticulum membrane	cellular_component	0.233012	1	2	278	54	16315	MARCH6,TECR
GO:0001779	natural killer cell differentiation	biological_process	0.233688	1	1	278	15	16315	STAT5B
GO:0042493	response to drug	biological_process	0.234363	1	3	278	94	16315	FOS,CREB,CREB,CREB,CREB,CREB,CREB
GO:0045595	regulation of cell differentiation	biological_process	0.23557	1	13	278	598	16315	BMP4
GO:0035335	peptidyl-tyrosine dephosphorylation	biological_process	0.235914	1	3	278	94	16315	PTPN11,DUSP1,MTMR3
GO:0060445	branching involved in salivary gland morphogenesis	biological_process	0.236049	1	1	278	15	16315	DAG1
GO:0001958	endochondral ossification	biological_process	0.237154	1	1	278	15	16315	BMP4
GO:0019722	calcium-mediated signaling	biological_process	0.237524	1	2	278	53	16315	RCAN1
GO:0006779	porphyrin-containing compound biosynthetic process	biological_process	0.238227	1	1	278	15	16315	ANK1
GO:0007286	spermatid development	biological_process	0.240564	1	2	278	55	16315	PRR2,HSPA2
GO:0043499	eukaryotic cell surface binding	molecular_function	0.242372	1	1	278	16	16315	HBEGF
GO:0009897	external side of plasma membrane	cellular_component	0.243603	1	4	278	142	16315	CXCL12,MFGE8,SLA-DQA1
GO:0007339	binding of sperm to zona pellucida	biological_process	0.243957	1	1	278	16	16315	ZP2
GO:0009566	fertilization	biological_process	0.244306	1	2	278	54	16315	PRR2
GO:0042734	presynaptic membrane	cellular_component	0.245221	1	1	278	14	16315	PICK1
GO:0030224	monocyte differentiation	biological_process	0.245432	1	1	278	16	16315	BMP4
GO:0046888	negative regulation of hormone secretion	biological_process	0.245655	1	1	278	17	16315	PTPN11
GO:0010862	positive regulation of pathway-restricted SMAD protein phosphorylation	biological_process	0.247793	1	1	278	16	16315	BMP4
GO:0060761	negative regulation of response to cytokine stimulus	biological_process	0.248259	1	1	278	16	16315	APOA1
GO:0005319	lipid transporter activity	molecular_function	0.250281	1	2	278	55	16315	APOA1,APOE
GO:0055038	recycling endosome membrane	cellular_component	0.25101	1	1	278	16	16315	EHD1
GO:0000187	activation of MAPK activity	biological_process	0.252083	1	2	278	55	16315	PTPN11,GAB1
GO:0004721	phosphoprotein phosphatase activity	molecular_function	0.254973	1	4	278	145	16315	PTPN11,PPP1CB,DUSP1
GO:0007009	plasma membrane organization	biological_process	0.255378	1	2	278	55	16315	ENSSSCG00000010212
GO:0008088	axon cargo transport	biological_process	0.256192	1	1	278	16	16315	ENSSSCG00000017381
GO:0005544	calcium-dependent phospholipid binding	molecular_function	0.256531	1	1	278	16	16315	ANXA2,ANXA2
GO:0001105	RNA polymerase II transcription coactivator activity	molecular_function	0.256785	1	1	278	18	16315	ANKRD1
GO:0006487	protein N-linked glycosylation	biological_process	0.256998	1	1	278	17	16315	DDOST
GO:0030513	positive regulation of BMP signaling pathway	biological_process	0.257904	1	1	278	17	16315	BMP4
GO:0008360	regulation of cell shape	biological_process	0.25845	1	2	278	55	16315	MYL12B,SH3KBP1
GO:0045839	negative regulation of mitosis	biological_process	0.258465	1	1	278	17	16315	BMP4
GO:0016504	peptidase activator activity	molecular_function	0.259123	1	1	278	17	16315	PCOLCE
GO:0045214	sarcomere organization	biological_process	0.259809	1	1	278	17	16315	CMYA1
GO:0006471	protein ADP-ribosylation	biological_process	0.260763	1	1	278	17	16315	ART3
GO:0021904	dorsal/ventral neural tube patterning	biological_process	0.261308	1	1	278	17	16315	BMP4
GO:0042594	response to starvation	biological_process	0.26156	1	2	278	56	16315	ACADM
GO:0046872	metal ion binding	molecular_function	0.26248	1	53	278	2769	16315	CYP4F55,CARNS1,RNF144B,ARG2,RXRG,MT-CO1,PPP1R10,PPP1R10,MTMR3,ADAMTS8,ZNF641,ZNF641,BMI1,NR1H2,FBXO40,ZMYND11,TRIM24,RORA,ZNF238,PGM5,ZDHHC9
GO:0048384	retinoic acid receptor signaling pathway	biological_process	0.262854	1	1	278	17	16315	RXRG
GO:0042311	vasodilation	biological_process	0.263412	1	1	278	19	16315	APOE
GO:0016311	dephosphorylation	biological_process	0.264842	1	6	278	246	16315	PTPN11,NT5M,DUSP1,MTMR3
GO:0001659	temperature homeostasis	biological_process	0.26664	1	1	278	18	16315	ACADL
GO:0006470	protein dephosphorylation	biological_process	0.267495	1	4	278	148	16315	PTPN11,PPP1CB,DUSP1,MTMR3
GO:0007257	activation of JUN kinase activity	biological_process	0.267804	1	1	278	17	16315	GAB1
GO:0010508	positive regulation of autophagy	biological_process	0.267892	1	1	278	17	16315	TP53INP1
GO:0003924	GTPase activity	molecular_function	0.269385	1	4	278	153	16315	EHD1,GBP1,EEF1A,ENSSSCG00000012178
GO:0005978	glycogen biosynthetic process	biological_process	0.269668	1	1	278	18	16315	ACADM
GO:0003676	nucleic acid binding	molecular_function	0.269796	1	47	278	2517	16315	TRNAU1AP,ENSSSCG00000024253,CLIP1,PRKRIR,ZFP91,ZBED6,DDX3X,ZNF511,EWSR1,PPP1R10,PPP1R10,ZNF641,ZNF641,ZNF641,EIF2C4,DDX46,ZFP36L1,ZNF238,ZXDC
GO:0002042	cell migration involved in sprouting angiogenesis	biological_process	0.270208	1	1	278	18	16315	NR4A1
GO:0001759	organ induction	biological_process	0.270939	1	1	278	18	16315	BMP4
GO:0008045	motor axon guidance	biological_process	0.271103	1	1	278	18	16315	CXCL12
GO:0050766	positive regulation of phagocytosis	biological_process	0.271598	1	1	278	18	16315	MFGE8
GO:0051924	regulation of calcium ion transport	biological_process	0.273017	1	2	278	57	16315	PLN
GO:0030234	enzyme regulator activity	molecular_function	0.273443	1	14	278	658	16315	APOC3
GO:0031225	anchored to membrane	cellular_component	0.276353	1	1	278	18	16315	CD59
GO:0008083	growth factor activity	molecular_function	0.276734	1	3	278	111	16315	BMP4,HBEGF,PDGFC
GO:0005789	endoplasmic reticulum membrane	cellular_component	0.277141	1	5	278	199	16315	DDOST,LMF1,PIGY
GO:0007409	axonogenesis	biological_process	0.278683	1	5	278	201	16315	PTPN11,CREB,CREB,CREB,CREB,CREB,CREB
GO:0032990	cell part morphogenesis	biological_process	0.279314	1	7	278	299	16315	PRR2
GO:0001726	ruffle	cellular_component	0.280218	1	2	278	58	16315	RDX,TNFRSF12A
GO:0006413	translational initiation	biological_process	0.280694	1	2	278	60	16315	EIF1AY
GO:0048745	smooth muscle tissue development	biological_process	0.281111	1	1	278	18	16315	BMP4
GO:0030890	positive regulation of B cell proliferation	biological_process	0.281235	1	1	278	19	16315	BMI1
GO:0051493	regulation of cytoskeleton organization	biological_process	0.281311	1	4	278	152	16315	NEXN
GO:0005158	insulin receptor binding	molecular_function	0.281487	1	1	278	19	16315	SORBS1
GO:0005484	SNAP receptor activity	molecular_function	0.282409	1	1	278	19	16315	STX16,STX16,STX16,STX16,STX16
GO:0051258	protein polymerization	biological_process	0.282638	1	3	278	107	16315	MID1IP1
GO:0042169	SH2 domain binding	molecular_function	0.2835	1	1	278	18	16315	DAG1
GO:0005792	microsome	cellular_component	0.284346	1	2	278	59	16315	DDOST,SNAP23
GO:0043388	positive regulation of DNA binding	biological_process	0.284377	1	1	278	20	16315	TXN
GO:0000790	nuclear chromatin	cellular_component	0.284476	1	3	278	106	16315	CREB,CREB,CREB,CREB,CREB,CREB,SMARCD3
GO:0005102	receptor binding	molecular_function	0.285137	1	16	278	801	16315	SLC9A3R2,SMARCD3,ENSSSCG00000027613
GO:0042593	glucose homeostasis	biological_process	0.285224	1	2	278	61	16315	PTPN11,SLC37A4
GO:0043029	T cell homeostasis	biological_process	0.285424	1	1	278	19	16315	STAT5B
GO:0043169	cation binding	molecular_function	0.28782	1	54	278	2851	16315	SLC3A2
GO:0001934	positive regulation of protein phosphorylation	biological_process	0.287986	1	7	278	306	16315	HSPA2,BMP4
GO:0043666	regulation of phosphoprotein phosphatase activity	biological_process	0.288028	1	1	278	19	16315	RCAN1
GO:0008168	methyltransferase activity	molecular_function	0.288789	1	4	278	154	16315	METTL12
GO:0016574	histone ubiquitination	biological_process	0.292252	1	1	278	20	16315	BMI1
GO:0019213	deacetylase activity	molecular_function	0.293056	1	1	278	19	16315	MACROD1
GO:0031175	neuron projection development	biological_process	0.293958	1	7	278	305	16315	ENSSSCG00000017381
GO:0016328	lateral plasma membrane	cellular_component	0.29495	1	1	278	19	16315	ENSSSCG00000010212
GO:0006952	defense response	biological_process	0.296366	1	9	278	422	16315	PBD-2
GO:0030509	BMP signaling pathway	biological_process	0.297542	1	2	278	63	16315	HFE2,BMP4
GO:0060393	regulation of pathway-restricted SMAD protein phosphorylation	biological_process	0.29855	1	1	278	20	16315	BMP4
GO:0004896	cytokine receptor activity	molecular_function	0.298712	1	2	278	64	16315	ENSSSCG00000027628,GHR
GO:0016705	oxidoreductase activity, acting on paired donors, with incorporation or reduction of molecular oxygen	molecular_function	0.299037	1	4	278	156	16315	CYP4F55
GO:0042147	retrograde transport, endosome to Golgi	biological_process	0.29937	1	1	278	20	16315	STX16
GO:0048009	insulin-like growth factor receptor signaling pathway	biological_process	0.299616	1	1	278	20	16315	GHR
GO:0001937	negative regulation of endothelial cell proliferation	biological_process	0.300529	1	1	278	20	16315	APOE
GO:0005776	autophagic vacuole	cellular_component	0.300712	1	1	278	20	16315	TP53INP1
GO:0000795	synaptonemal complex	cellular_component	0.301597	1	1	278	20	16315	HSPA2
GO:0040007	growth	biological_process	0.302213	1	10	278	467	16315	BMP4
GO:0008284	positive regulation of cell proliferation	biological_process	0.302444	1	8	278	370	16315	STAT5B,BMP4,PDGFC
GO:0006687	glycosphingolipid metabolic process	biological_process	0.304308	1	1	278	20	16315	CREB,CREB,CREB,CREB,CREB,CREB,CREB
GO:0016197	endosome transport	biological_process	0.304765	1	2	278	62	16315	EHD1
GO:0045111	intermediate filament cytoskeleton	cellular_component	0.306668	1	3	278	113	16315	VIM
GO:0043488	regulation of mRNA stability	biological_process	0.307485	1	1	278	22	16315	ZFP36L1
GO:0005768	endosome	cellular_component	0.307744	1	5	278	206	16315	EHD1
GO:0004181	metallocarboxypeptidase activity	molecular_function	0.308394	1	1	278	20	16315	CPXM1
GO:0050680	negative regulation of epithelial cell proliferation	biological_process	0.311078	1	2	278	64	16315	BMP4
GO:0030198	extracellular matrix organization	biological_process	0.313274	1	3	278	110	16315	HSD17B12
GO:0006506	GPI anchor biosynthetic process	biological_process	0.314129	1	1	278	22	16315	PIGY
GO:0015631	tubulin binding	molecular_function	0.315567	1	3	278	110	16315	CLIP1,DAG1
GO:0015035	protein disulfide oxidoreductase activity	molecular_function	0.319142	1	1	278	22	16315	TXN
GO:0045103	intermediate filament-based process	biological_process	0.321942	1	1	278	22	16315	VIM
GO:0001667	ameboidal cell migration	biological_process	0.322385	1	2	278	67	16315	CXCL12
GO:0009887	organ morphogenesis	biological_process	0.323806	1	11	278	537	16315	PDGFC
GO:0042476	odontogenesis	biological_process	0.324463	1	2	278	67	16315	BMP4
GO:0035136	forelimb morphogenesis	biological_process	0.324658	1	1	278	23	16315	ZBTB16
GO:0060079	regulation of excitatory postsynaptic membrane potential	biological_process	0.324743	1	1	278	21	16315	ADORA1
GO:0005881	cytoplasmic microtubule	cellular_component	0.327616	1	1	278	22	16315	CLIP1
GO:0030593	neutrophil chemotaxis	biological_process	0.327646	1	1	278	23	16315	SLC37A4
GO:0035690	cellular response to drug	biological_process	0.328425	1	1	278	22	16315	ANKRD1
GO:0004129	cytochrome-c oxidase activity	molecular_function	0.329077	1	1	278	26	16315	MT-CO1
GO:0071347	cellular response to interleukin-1	biological_process	0.331023	1	1	278	23	16315	ANKRD1
GO:0055013	cardiac muscle cell development	biological_process	0.335082	1	1	278	23	16315	CMYA1
GO:0008234	cysteine-type peptidase activity	molecular_function	0.336433	1	3	278	115	16315	USP9Y,CTSC,USP25,USP25
GO:0000139	Golgi membrane	cellular_component	0.337087	1	3	278	119	16315	ENSSSCG00000026167
GO:0051345	positive regulation of hydrolase activity	biological_process	0.338834	1	6	278	266	16315	APOA1
GO:0042787	protein ubiquitination involved in ubiquitin-dependent protein catabolic process	biological_process	0.339428	1	1	278	23	16315	RNF144B
GO:0005769	early endosome	cellular_component	0.339987	1	2	278	66	16315	ANXA2,ANXA2,EHD1
GO:0030971	receptor tyrosine kinase binding	molecular_function	0.340028	1	1	278	23	16315	PTPN11
GO:0050660	flavin adenine dinucleotide binding	molecular_function	0.3407	1	2	278	67	16315	ACADL,ACADM
GO:0042542	response to hydrogen peroxide	biological_process	0.343597	1	1	278	24	16315	PARK7
GO:0001578	microtubule bundle formation	biological_process	0.343913	1	1	278	24	16315	CLIP1
GO:0030968	endoplasmic reticulum unfolded protein response	biological_process	0.345313	1	1	278	25	16315	NFE2L2
GO:0006809	nitric oxide biosynthetic process	biological_process	0.347673	1	1	278	24	16315	RORA
GO:0032091	negative regulation of protein binding	biological_process	0.348752	1	1	278	25	16315	PARK7
GO:0015179	L-amino acid transmembrane transporter activity	molecular_function	0.348837	1	1	278	24	16315	SLC7A8,SLC7A8
GO:0019838	growth factor binding	molecular_function	0.348898	1	2	278	70	16315	GHR
GO:0043393	regulation of protein binding	biological_process	0.349252	1	2	278	70	16315	SMARCD3
GO:0060512	prostate gland morphogenesis	biological_process	0.349266	1	1	278	24	16315	BMP4
GO:0030027	lamellipodium	cellular_component	0.349489	1	2	278	68	16315	RDX,DAG1
GO:0034453	microtubule anchoring	biological_process	0.351179	1	1	278	24	16315	DAG1
GO:0042393	histone binding	molecular_function	0.352309	1	2	278	70	16315	WDTC1
GO:0019904	protein domain specific binding	molecular_function	0.352426	1	6	278	274	16315	PICK1,NFE2L2,BHLHE40
GO:0003407	neural retina development	biological_process	0.353753	1	1	278	25	16315	SMARCD3
GO:0030032	lamellipodium assembly	biological_process	0.354493	1	1	278	24	16315	NCK2
GO:0051259	protein oligomerization	biological_process	0.354568	1	4	278	174	16315	OLFM1
GO:0007605	sensory perception of sound	biological_process	0.354783	1	2	278	70	16315	COL3A1,CEACAM16,CEACAM16
GO:0055010	ventricular cardiac muscle tissue morphogenesis	biological_process	0.354907	1	1	278	25	16315	TPM1
GO:0051087	chaperone binding	molecular_function	0.356401	1	1	278	25	16315	ALB
GO:0003333	amino acid transmembrane transport	biological_process	0.356433	1	1	278	25	16315	SLC7A8,SLC7A8
GO:0030838	positive regulation of actin filament polymerization	biological_process	0.356474	1	1	278	25	16315	NCK2
GO:0070098	chemokine-mediated signaling pathway	biological_process	0.35797	1	1	278	27	16315	CXCL12
GO:0001657	ureteric bud development	biological_process	0.358776	1	2	278	72	16315	ARG2,BMP4
GO:0015807	L-amino acid transport	biological_process	0.359752	1	1	278	25	16315	SLC7A8,SLC7A8
GO:0033628	regulation of cell adhesion mediated by integrin	biological_process	0.361255	1	1	278	25	16315	PTPN11
GO:0009314	response to radiation	biological_process	0.361774	1	4	278	174	16315	TXN,COL3A1
GO:0031072	heat shock protein binding	molecular_function	0.361914	1	2	278	72	16315	DNAJB5,DNAJC7
GO:0050679	positive regulation of epithelial cell proliferation	biological_process	0.362454	1	2	278	75	16315	BMP4
GO:0000082	G1/S transition of mitotic cell cycle	biological_process	0.362826	1	2	278	73	16315	EIF4EBP1,CDKN2C
GO:0004601	peroxidase activity	molecular_function	0.36587	1	1	278	26	16315	PARK7
GO:0030324	lung development	biological_process	0.366009	1	3	278	123	16315	BMP4
GO:0048754	branching morphogenesis of a tube	biological_process	0.36782	1	3	278	125	16315	BMP4
GO:0070936	protein K48-linked ubiquitination	biological_process	0.372848	1	1	278	27	16315	2023-03-06
GO:0010595	positive regulation of endothelial cell migration	biological_process	0.37358	1	1	278	26	16315	BMP4
GO:0000785	chromatin	cellular_component	0.374213	1	5	278	247	16315	NFE2L2,PPP1R10,PPP1R10
GO:0042995	cell projection	cellular_component	0.374563	1	11	278	538	16315	VIM
GO:0030374	ligand-dependent nuclear receptor transcription coactivator activity	molecular_function	0.375248	1	1	278	26	16315	SMARCD3
GO:0007249	I-kappaB kinase/NF-kappaB cascade	biological_process	0.375762	1	3	278	126	16315	TIAF1
GO:0009791	post-embryonic development	biological_process	0.381064	1	2	278	74	16315	ACADM
GO:0008017	microtubule binding	molecular_function	0.382203	1	2	278	74	16315	CAMSAP1,CLIP1
GO:0004221	ubiquitin thiolesterase activity	molecular_function	0.383517	1	2	278	74	16315	USP9Y,USP25,USP25
GO:0060048	cardiac muscle contraction	biological_process	0.383704	1	1	278	27	16315	TPM1
GO:0031929	TOR signaling cascade	biological_process	0.386092	1	1	278	27	16315	EIF4EBP1
GO:0007005	mitochondrion organization	biological_process	0.386393	1	3	278	128	16315	PARK7
GO:0048013	ephrin receptor signaling pathway	biological_process	0.386894	1	1	278	27	16315	PTPN11
GO:0005245	voltage-gated calcium channel activity	molecular_function	0.387472	1	1	278	26	16315	CACNB1
GO:0006468	protein phosphorylation	biological_process	0.393714	1	19	278	994	16315	PKDCC,ST3GAL1,ST3GAL1,SRPK3,CREB,CREB,CREB,CREB,CREB,CREB,DYRK1B,SLK,MAPK6,HIPK3,TRIM24
GO:0031519	PcG protein complex	cellular_component	0.394374	1	1	278	28	16315	BMI1
GO:0004843	ubiquitin-specific protease activity	molecular_function	0.395587	1	1	278	28	16315	USP25
GO:0030178	negative regulation of Wnt receptor signaling pathway	biological_process	0.398841	1	2	278	79	16315	NXN
GO:0048566	embryonic digestive tract development	biological_process	0.399811	1	1	278	29	16315	PKDCC
GO:0007205	activation of protein kinase C activity by G-protein coupled receptor protein signaling pathway	biological_process	0.400623	1	1	278	29	16315	PICK1
GO:0005777	peroxisome	cellular_component	0.400875	1	2	278	77	16315	PMVK,VIM
GO:0001569	patterning of blood vessels	biological_process	0.403502	1	1	278	29	16315	CXCL12
GO:0016620	oxidoreductase activity, acting on the aldehyde or oxo group of donors, NAD or NADP as acceptor	molecular_function	0.404402	1	1	278	29	16315	ALDH4A1
GO:0044262	cellular carbohydrate metabolic process	biological_process	0.405044	1	3	278	132	16315	LDHA
GO:0043066	negative regulation of apoptosis	biological_process	0.405783	1	6	278	295	16315	CXCL12,STAT5B,ALB,BMI1
GO:0051925	regulation of calcium ion transport via voltage-gated calcium channel activity	biological_process	0.406891	1	1	278	28	16315	CACNB1
GO:0001938	positive regulation of endothelial cell proliferation	biological_process	0.407979	1	1	278	31	16315	NR4A1
GO:0045177	apical part of cell	cellular_component	0.408142	1	3	278	129	16315	MYL12B,RDX
GO:0042445	hormone metabolic process	biological_process	0.40916	1	2	278	79	16315	PTPN11
GO:0009948	anterior/posterior axis specification	biological_process	0.412772	1	1	278	30	16315	BMP4
GO:0009408	response to heat	biological_process	0.415271	1	1	278	30	16315	CASQ1
GO:0050729	positive regulation of inflammatory response	biological_process	0.415322	1	1	278	31	16315	STAT5B
GO:0010811	positive regulation of cell-substrate adhesion	biological_process	0.416016	1	1	278	30	16315	HSD17B12
GO:0006810	transport	biological_process	0.416697	1	42	278	2298	16315	SLC25A34,KCNA7,APOC3,SLC37A4,SLC37A4,ALB,SLC25A32,APOA1,APOE
GO:0007044	cell-substrate junction assembly	biological_process	0.419082	1	1	278	29	16315	TNS1
GO:0009060	aerobic respiration	biological_process	0.420497	1	1	278	31	16315	MT-CO1
GO:0050661	NADP binding	molecular_function	0.423295	1	1	278	30	16315	NNT
GO:0004180	carboxypeptidase activity	molecular_function	0.424968	1	1	278	30	16315	CPXM1
GO:0008286	insulin receptor signaling pathway	biological_process	0.425516	1	1	278	31	16315	EIF4EBP1
GO:0006511	ubiquitin-dependent protein catabolic process	biological_process	0.427082	1	5	278	241	16315	USP9Y,UBD,UBD,USP25,USP25
GO:0001948	glycoprotein binding	molecular_function	0.427501	1	1	278	31	16315	SHB
GO:0005694	chromosome	cellular_component	0.428418	1	8	278	424	16315	SETD7
GO:0051082	unfolded protein binding	molecular_function	0.434753	1	2	278	85	16315	DNAJB5,DNAJC7
GO:0043123	positive regulation of I-kappaB kinase/NF-kappaB cascade	biological_process	0.435782	1	2	278	85	16315	TAB2,UBD,UBD
GO:0030326	embryonic limb morphogenesis	biological_process	0.438033	1	2	278	85	16315	BMP4
GO:0001701	in utero embryonic development	biological_process	0.438479	1	5	278	247	16315	WDTC1,BMI1,JUNB,TPM1
GO:0005902	microvillus	cellular_component	0.44126	1	1	278	32	16315	RDX
GO:0000118	histone deacetylase complex	cellular_component	0.442642	1	1	278	32	16315	CIR1
GO:0030316	osteoclast differentiation	biological_process	0.444401	1	1	278	33	16315	JUNB
GO:0050777	negative regulation of immune response	biological_process	0.444606	1	1	278	33	16315	COL3A1
GO:0060548	negative regulation of cell death	biological_process	0.448271	1	6	278	308	16315	BMP4,PARK7
GO:0071260	cellular response to mechanical stimulus	biological_process	0.449955	1	1	278	33	16315	ANKRD1
GO:0008009	chemokine activity	molecular_function	0.450585	1	1	278	39	16315	CXCL12
GO:0019205	nucleobase-containing compound kinase activity	molecular_function	0.450852	1	1	278	34	16315	AK1
GO:0007160	cell-matrix adhesion	biological_process	0.451414	1	2	278	85	16315	COL3A1,BCAM
GO:0030163	protein catabolic process	biological_process	0.45214	1	7	278	360	16315	TRIM24
GO:0001649	osteoblast differentiation	biological_process	0.457441	1	2	278	90	16315	BMP4,JUNB
GO:0005178	integrin binding	molecular_function	0.459022	1	1	278	34	16315	MFGE8
GO:0051145	smooth muscle cell differentiation	biological_process	0.463701	1	1	278	36	16315	BMP4
GO:0003743	translation initiation factor activity	molecular_function	0.46601	1	1	278	36	16315	EIF1AY
GO:0060113	inner ear receptor cell differentiation	biological_process	0.467877	1	1	278	35	16315	BMP4
GO:0045666	positive regulation of neuron differentiation	biological_process	0.468573	1	1	278	38	16315	BMP4
GO:0050885	neuromuscular process controlling balance	biological_process	0.469286	1	1	278	35	16315	ENSSSCG00000017381
GO:0042733	embryonic digit morphogenesis	biological_process	0.47212	1	1	278	36	16315	BMP4
GO:0050839	cell adhesion molecule binding	molecular_function	0.472963	1	1	278	34	16315	PRR2
GO:0009880	embryonic pattern specification	biological_process	0.475083	1	1	278	37	16315	ZBTB16
GO:0005743	mitochondrial inner membrane	cellular_component	0.476351	1	4	278	209	16315	MT-ND5,G3PD,MT-CO1
GO:0051781	positive regulation of cell division	biological_process	0.481091	1	1	278	37	16315	PDGFC
GO:0031623	receptor internalization	biological_process	0.482291	1	1	278	37	16315	GHR
GO:0051015	actin filament binding	molecular_function	0.483888	1	1	278	37	16315	NEXN,NEXN
GO:0030141	stored secretory granule	cellular_component	0.485848	1	2	278	93	16315	ZP2
GO:0090263	positive regulation of canonical Wnt receptor signaling pathway	biological_process	0.488803	1	1	278	38	16315	COL3A1
GO:0051897	positive regulation of protein kinase B signaling cascade	biological_process	0.488939	1	1	278	38	16315	HBEGF
GO:0051287	NAD binding	molecular_function	0.489458	1	1	278	37	16315	GPD1
GO:0043235	receptor complex	cellular_component	0.489759	1	2	278	92	16315	GHR
GO:0007417	central nervous system development	biological_process	0.490169	1	7	278	381	16315	ZBTB16
GO:0048663	neuron fate commitment	biological_process	0.492223	1	1	278	42	16315	BMP4
GO:0007399	nervous system development	biological_process	0.499095	1	15	278	841	16315	FOS,UTP11L
GO:0007229	integrin-mediated signaling pathway	biological_process	0.499242	1	1	278	38	16315	COL3A1
GO:0004725	protein tyrosine phosphatase activity	molecular_function	0.500963	1	2	278	94	16315	PTPN11,DUSP1
GO:0006959	humoral immune response	biological_process	0.503318	1	1	278	40	16315	BMI1
GO:0001889	liver development	biological_process	0.504405	1	1	278	40	16315	ACADM
GO:0060688	regulation of morphogenesis of a branching structure	biological_process	0.504952	1	1	278	40	16315	BMP4
GO:0006457	protein folding	biological_process	0.505161	1	3	278	155	16315	DNAJB5,ENSSSCG00000030054,DNAJC7
GO:0001707	mesoderm formation	biological_process	0.506704	1	1	278	41	16315	BMP4
GO:0055072	iron ion homeostasis	biological_process	0.507894	1	1	278	43	16315	HFE2
GO:0043588	skin development	biological_process	0.509932	1	1	278	40	16315	COL3A1
GO:0008138	protein tyrosine/serine/threonine phosphatase activity	molecular_function	0.512166	1	1	278	42	16315	DUSP1
GO:0001658	branching involved in ureteric bud morphogenesis	biological_process	0.512429	1	1	278	42	16315	BMP4
GO:0043409	negative regulation of MAPKKK cascade	biological_process	0.514094	1	1	278	40	16315	DAG1
GO:0016788	hydrolase activity, acting on ester bonds	molecular_function	0.515217	1	11	278	612	16315	FASN
GO:0005267	potassium channel activity	molecular_function	0.515446	1	2	278	103	16315	KCNA7
GO:0030133	transport vesicle	cellular_component	0.520136	1	1	278	41	16315	BGN
GO:0001077	RNA polymerase II core promoter proximal region sequence-specific DNA binding transcription factor activity involved in positive regulation of transcription	molecular_function	0.528239	1	1	278	44	16315	NR4A1
GO:0043154	negative regulation of cysteine-type endopeptidase activity involved in apoptotic process	biological_process	0.530012	1	1	278	44	16315	NR4A1
GO:0008289	lipid binding	molecular_function	0.533685	1	9	278	497	16315	APOC3,APOA1,APOE
GO:0051346	negative regulation of hydrolase activity	biological_process	0.53383	1	3	278	163	16315	APOA1
GO:0008544	epidermis development	biological_process	0.534474	1	3	278	161	16315	GAB1
GO:0050714	positive regulation of protein secretion	biological_process	0.537327	1	1	278	44	16315	ANKRD1
GO:0043010	camera-type eye development	biological_process	0.537858	1	3	278	164	16315	BMP4
GO:0017015	regulation of transforming growth factor beta receptor signaling pathway	biological_process	0.537944	1	1	278	44	16315	C5ORF13
GO:0006816	calcium ion transport	biological_process	0.539303	1	3	278	157	16315	CACNB1,PLN
GO:0009898	internal side of plasma membrane	cellular_component	0.540781	1	1	278	44	16315	PGM5
GO:0001756	somitogenesis	biological_process	0.541791	1	1	278	45	16315	MYF5
GO:0000151	ubiquitin ligase complex	cellular_component	0.547633	1	2	278	104	16315	DCUN1D1,BMI1
GO:0005813	centrosome	cellular_component	0.548751	1	5	278	274	16315	CLIP1,SORBS1,CEP85,NFE2L2,FBXO40
GO:0006184	GTP catabolic process	biological_process	0.548992	1	6	278	334	16315	EHD1,GBP1,EEF1A,ENSSSCG00000012178
GO:0007411	axon guidance	biological_process	0.552016	1	2	278	104	16315	ENSSSCG00000010212
GO:0018107	peptidyl-threonine phosphorylation	biological_process	0.552654	1	1	278	45	16315	HIPK3
GO:0008026	ATP-dependent helicase activity	molecular_function	0.552885	1	2	278	103	16315	DDX3X,DDX46
GO:0072001	renal system development	biological_process	0.555093	1	3	278	165	16315	BMP4
GO:0006338	chromatin remodeling	biological_process	0.560947	1	1	278	46	16315	SMARCD3
GO:0030496	midbody	cellular_component	0.562103	1	1	278	46	16315	ANXA2
GO:0008013	beta-catenin binding	molecular_function	0.566985	1	1	278	45	16315	SLC9A3R2
GO:0071222	cellular response to lipopolysaccharide	biological_process	0.568612	1	1	278	48	16315	ANKRD1
GO:0042475	odontogenesis of dentine-containing tooth	biological_process	0.5699	1	1	278	48	16315	BMP4
GO:0006644	phospholipid metabolic process	biological_process	0.571394	1	3	278	168	16315	APOA1
GO:0007420	brain development	biological_process	0.576026	1	5	278	292	16315	CXCL12,BMI1
GO:0044344	cellular response to fibroblast growth factor stimulus	biological_process	0.576928	1	1	278	50	16315	NR4A1
GO:0008270	zinc ion binding	molecular_function	0.577967	1	27	278	1578	16315	ENSSSCG00000024253,ZHX1,CLIP1,TAB2,CPXM1,RNF144B,ZFP91,MARCH2,RXRG,ZNF511,MARCH6,EWSR1,ITGB1BP2,PPP1R10,PPP1R10,ADAMTS8,ZNF641,ZNF641,ZNF641,BMI1,NR1H2,FBXO40,ZMYND11,TRIM24,RORA,ZFP36L1,ZNF238,SMYD2,ZXDC,ZDHHC9
GO:0031410	cytoplasmic vesicle	cellular_component	0.581647	1	6	278	346	16315	SNAP23,MARCH2,APOA1
GO:0006839	mitochondrial transport	biological_process	0.582577	1	1	278	50	16315	SLC25A32
GO:0005624	membrane fraction	cellular_component	0.583977	1	3	278	170	16315	ENSSSCG00000010212,MTMR3,SYNM
GO:0015171	amino acid transmembrane transporter activity	molecular_function	0.584107	1	1	278	49	16315	SLC7A8,SLC7A8
GO:0016301	kinase activity	molecular_function	0.590178	1	13	278	755	16315	PFKFB1,CKMT2,AK1,PGK1,PKM2
GO:0008033	tRNA processing	biological_process	0.591658	1	1	278	51	16315	URM1
GO:0005887	integral to plasma membrane	cellular_component	0.597792	1	5	278	294	16315	GHR,HBEGF
GO:0006813	potassium ion transport	biological_process	0.59811	1	2	278	119	16315	KCNN1,KCNA7
GO:0060021	palate development	biological_process	0.599547	1	1	278	52	16315	PKDCC
GO:0005506	iron ion binding	molecular_function	0.600957	1	3	278	182	16315	CYP4F55,MT-CO1,SCD
GO:0005923	tight junction	cellular_component	0.601531	1	1	278	54	16315	ENSSSCG00000010212
GO:0015934	large ribosomal subunit	cellular_component	0.603762	1	1	278	60	16315	ENSSSCG00000024398
GO:0008344	adult locomotory behavior	biological_process	0.604695	1	1	278	52	16315	PARK7
GO:0009416	response to light stimulus	biological_process	0.606747	1	2	278	117	16315	BHLHE40,PER1
GO:0001843	neural tube closure	biological_process	0.607036	1	1	278	52	16315	BMP4
GO:0071805	potassium ion transmembrane transport	biological_process	0.607282	1	1	278	57	16315	KCNA7
GO:0043410	positive regulation of MAPKKK cascade	biological_process	0.607817	1	2	278	117	16315	GAB1
GO:0006364	rRNA processing	biological_process	0.608201	1	1	278	55	16315	UTP11L
GO:0046777	protein autophosphorylation	biological_process	0.609063	1	2	278	113	16315	SLK,TRIM24
GO:0070374	positive regulation of ERK1 and ERK2 cascade	biological_process	0.610345	1	1	278	55	16315	BMP4
GO:0016853	isomerase activity	molecular_function	0.616877	1	2	278	118	16315	GPI
GO:0000922	spindle pole	cellular_component	0.617179	1	1	278	53	16315	CEP85
GO:0032259	methylation	biological_process	0.618872	1	3	278	179	16315	METTL12
GO:0000077	DNA damage checkpoint	biological_process	0.623702	1	1	278	55	16315	PTPN11
GO:0009267	cellular response to starvation	biological_process	0.626571	1	1	278	55	16315	ALB
GO:0003824	catalytic activity	molecular_function	0.627901	1	86	278	5004	16315	PFKFB1,PFKFB1,CKMT2,GANC,HP,HP,SLC3A2,PKM2,ACSL4,LDHA
GO:0030170	pyridoxal phosphate binding	molecular_function	0.628824	1	1	278	55	16315	ALB
GO:0016820	hydrolase activity, acting on acid anhydrides, catalyzing transmembrane movement of substances	molecular_function	0.630899	1	2	278	119	16315	ENSSSCG00000027344
GO:0003729	mRNA binding	molecular_function	0.631487	1	1	278	56	16315	PARK7
GO:0051260	protein homooligomerization	biological_process	0.635638	1	2	278	126	16315	EHD1,KCNA7
GO:0015672	monovalent inorganic cation transport	biological_process	0.636311	1	4	278	255	16315	ANK1
GO:0047485	protein N-terminus binding	molecular_function	0.640844	1	1	278	57	16315	EXOC2
GO:0090090	negative regulation of canonical Wnt receptor signaling pathway	biological_process	0.642461	1	1	278	58	16315	MLLT3
GO:0007259	JAK-STAT cascade	biological_process	0.642904	1	1	278	59	16315	STAT5B
GO:0001656	metanephros development	biological_process	0.644097	1	1	278	60	16315	BMP4
GO:0071013	catalytic step 2 spliceosome	cellular_component	0.647001	1	1	278	58	16315	PNN
GO:0035265	organ growth	biological_process	0.647354	1	1	278	59	16315	PTPN11
GO:0043524	negative regulation of neuron apoptosis	biological_process	0.655148	1	1	278	61	16315	PARK7
GO:0016757	transferase activity, transferring glycosyl groups	molecular_function	0.655383	1	4	278	261	16315	ST3GAL1,ST3GAL1,SIAT7B
GO:0006508	proteolysis	biological_process	0.6565	1	12	278	741	16315	USP9Y,CPXM1,HP,HP,PCOLCE,CTSC,USP25,USP25,ADAMTS8
GO:0042278	purine nucleoside metabolic process	biological_process	0.658589	1	9	278	555	16315	MACROD1
GO:0060348	bone development	biological_process	0.658927	1	1	278	61	16315	BMP4
GO:0001822	kidney development	biological_process	0.661938	1	2	278	129	16315	BMP4
GO:0048593	camera-type eye morphogenesis	biological_process	0.662226	1	1	278	62	16315	BMP4
GO:0005125	cytokine activity	molecular_function	0.665381	1	2	278	141	16315	CXCL12,BMP4
GO:0006865	amino acid transport	biological_process	0.671293	1	1	278	62	16315	SLC7A8,SLC7A8
GO:0007224	smoothened signaling pathway	biological_process	0.675973	1	1	278	63	16315	BMP4
GO:0005244	voltage-gated ion channel activity	molecular_function	0.678369	1	2	278	135	16315	KCNA7
GO:0019902	phosphatase binding	molecular_function	0.691251	1	1	278	65	16315	SLC9A3R2
GO:0005543	phospholipid binding	molecular_function	0.695205	1	6	278	382	16315	ENSSSCG00000030000,GAB1,APOC3,APOA1
GO:0016323	basolateral plasma membrane	cellular_component	0.697898	1	1	278	66	16315	ENSSSCG00000010212
GO:0005525	GTP binding	molecular_function	0.699314	1	5	278	339	16315	EHD1,GBP1,EEF1A,RND3,ENSSSCG00000012178
GO:0020037	heme binding	molecular_function	0.703045	1	2	278	142	16315	CYP4F55,MT-CO1
GO:0005249	voltage-gated potassium channel activity	molecular_function	0.704259	1	1	278	74	16315	KCNA7
GO:0043433	negative regulation of sequence-specific DNA binding transcription factor activity	biological_process	0.705998	1	1	278	71	16315	BHLHE40
GO:0050808	synapse organization	biological_process	0.716516	1	1	278	71	16315	ENSSSCG00000010212
GO:0060429	epithelium development	biological_process	0.722172	1	6	278	409	16315	BMP4
GO:0007601	visual perception	biological_process	0.724364	1	1	278	73	16315	COL3A1
GO:0010952	positive regulation of peptidase activity	biological_process	0.724995	1	1	278	73	16315	PCOLCE
GO:0031965	nuclear membrane	cellular_component	0.728134	1	1	278	72	16315	SLC16A3
GO:0004867	serine-type endopeptidase inhibitor activity	molecular_function	0.738366	1	1	278	77	16315	ITIH5
GO:0004252	serine-type endopeptidase activity	molecular_function	0.747347	1	2	278	155	16315	HP,HP,CTSC
GO:0001666	response to hypoxia	biological_process	0.74815	1	1	278	77	16315	HMOX2
GO:0004386	helicase activity	molecular_function	0.748794	1	2	278	149	16315	DDX3X,DDX46
GO:0051604	protein maturation	biological_process	0.75433	1	1	278	78	16315	LMF1
GO:0000166	nucleotide binding	molecular_function	0.75623	1	35	278	2173	16315	TRNAU1AP,HSD17B12,HSD17B12,ADCY2,FASN,CKMT2,GPD1,AK1,SRPK3,DDX3X,ENSSSCG00000020706,HSPA2,DYRK1B,EWSR1,SLK,MAPK6,NMRAL1,EEF1A,HIPK3,RND3,ADCY9,DDX46,ENSSSCG00000024109,ENSSSCG00000012178,LDHA
GO:0016298	lipase activity	molecular_function	0.756437	1	1	278	78	16315	LIPE
GO:0048598	embryonic morphogenesis	biological_process	0.756462	1	5	278	367	16315	BMP4
GO:0045121	membrane raft	cellular_component	0.762676	1	1	278	79	16315	DAG1
GO:0004674	protein serine/threonine kinase activity	molecular_function	0.76708	1	5	278	354	16315	SRPK3,DYRK1B,SLK,MAPK6,HIPK3
GO:0007264	small GTPase mediated signal transduction	biological_process	0.769166	1	7	278	489	16315	RND3
GO:0009617	response to bacterium	biological_process	0.772295	1	2	278	163	16315	PBD-2
GO:0030308	negative regulation of cell growth	biological_process	0.778636	1	1	278	86	16315	CDKN2C
GO:0016573	histone acetylation	biological_process	0.778684	1	1	278	84	16315	BMI1
GO:0012506	vesicle membrane	cellular_component	0.779124	1	1	278	84	16315	NCK2
GO:0018105	peptidyl-serine phosphorylation	biological_process	0.784449	1	1	278	87	16315	HIPK3
GO:0001816	cytokine production	biological_process	0.786928	1	3	278	240	16315	SLC37A4
GO:0016324	apical plasma membrane	cellular_component	0.789727	1	1	278	86	16315	SLC9A3R2
GO:0016772	transferase activity, transferring phosphorus-containing groups	molecular_function	0.802293	1	13	278	887	16315	PKDCC,CKMT2,SRPK3,DYRK1B,SLK,MAPK6,HIPK3
GO:0030036	actin cytoskeleton organization	biological_process	0.806659	1	3	278	244	16315	CMYA1
GO:0055085	transmembrane transport	biological_process	0.81002	1	10	278	714	16315	KCNA7,SLC16A3,SLC37A4,SLC37A4,KIAA1919
GO:0006811	ion transport	biological_process	0.818703	1	12	278	851	16315	KCNA7
GO:0051091	positive regulation of sequence-specific DNA binding transcription factor activity	biological_process	0.820015	1	1	278	96	16315	ABRA
GO:0046034	ATP metabolic process	biological_process	0.823497	1	2	278	176	16315	AK1
GO:0004553	hydrolase activity, hydrolyzing O-glycosyl compounds	molecular_function	0.824049	1	1	278	96	16315	GANC
GO:0030425	dendrite	cellular_component	0.828955	1	1	278	95	16315	ADCY2
GO:0034765	regulation of ion transmembrane transport	biological_process	0.835067	1	1	278	103	16315	KCNA7
GO:0004497	monooxygenase activity	molecular_function	0.83509	1	1	278	101	16315	CYP4F55
GO:0008237	metallopeptidase activity	molecular_function	0.836962	1	2	278	180	16315	ADAMTS8
GO:0048471	perinuclear region of cytoplasm	cellular_component	0.837071	1	2	278	183	16315	ENSSSCG00000026167,ANKRD1
GO:0007156	homophilic cell adhesion	biological_process	0.839133	1	1	278	103	16315	PRR2
GO:0050730	regulation of peptidyl-tyrosine phosphorylation	biological_process	0.855781	1	1	278	110	16315	PDGFC
GO:0016887	ATPase activity	molecular_function	0.855907	1	4	278	336	16315	CARNS1
GO:0016020	membrane	cellular_component	0.856051	1	80	278	5305	16315	ADCY2,SLA-DRA1,ST3GAL1,ST3GAL1,MT-ND5,SLC25A34,PRR2,PRR2,KCNA7,SLC7A8,SLC7A8,ENSSSCG00000017381,ENSSSCG00000027628,BCAM,GYPC,MT-CO1,CD36,CD36,SLC25A32,DAG1,SCARB2,GHR,SLA-DQA1,SIAT7B,SERINC2,RND3,TSPAN9,STX16,STX16,STX16,STX16,STX16,STX16,NADH4,SLA-10,SLA-10,SCD,HIGD2A,HBEGF,ANK1,CD59,PLN,PDGFC
GO:0006887	exocytosis	biological_process	0.861016	1	1	278	109	16315	SNAP23
GO:0021537	telencephalon development	biological_process	0.861162	1	1	278	111	16315	BMP4
GO:0007015	actin filament organization	biological_process	0.868904	1	1	278	115	16315	NCK2
GO:0030900	forebrain development	biological_process	0.869823	1	2	278	200	16315	BMP4
GO:0008233	peptidase activity	molecular_function	0.877848	1	7	278	570	16315	USP9Y,CTSC,USP25,USP25,ADAMTS8,PARK7
GO:0003774	motor activity	molecular_function	0.881786	1	1	278	116	16315	MYH1
GO:0004222	metalloendopeptidase activity	molecular_function	0.882988	1	1	278	119	16315	ADAMTS8
GO:0007165	signal transduction	biological_process	0.88733	1	56	278	3929	16315	ADORA1,ARRDC3,STAT5B,GAB1,ENSSSCG00000010212,PER1,ANK1,PPP1R1A
GO:0045202	synapse	cellular_component	0.890058	1	2	278	205	16315	ENSSSCG00000010212
GO:0006396	RNA processing	biological_process	0.891404	1	3	278	295	16315	PRPF39
GO:0003723	RNA binding	molecular_function	0.892179	1	5	278	448	16315	EIF1AY,PPP1R10,PPP1R10,EIF2C4
GO:0003682	chromatin binding	molecular_function	0.89376	1	2	278	216	16315	BMI1,TRIM24
GO:0016740	transferase activity	molecular_function	0.894729	1	23	278	1631	16315	CKMT2,ST3GAL1,ST3GAL1,AK1,PGK1,SIAT7B,PKM2
GO:0004672	protein kinase activity	molecular_function	0.904272	1	7	278	587	16315	PKDCC,SRPK3,DYRK1B,SLK,MAPK6,HIPK3,TRIM24
GO:0006200	ATP catabolic process	biological_process	0.90918	1	1	278	132	16315	CARNS1
GO:0015630	microtubule cytoskeleton	cellular_component	0.916472	1	6	278	528	16315	CLIP1,MID1IP1
GO:0016787	hydrolase activity	molecular_function	0.923112	1	30	278	2124	16315	PTPN11,USP9Y,PPP1CB,ARG2,DDX3X,CTSC,LIPE,DUSP1,USP25,USP25,ADAMTS8,DDX46
GO:0045165	cell fate commitment	biological_process	0.925318	1	1	278	152	16315	BMP4
GO:0007548	sex differentiation	biological_process	0.926682	1	1	278	149	16315	STAT5B
GO:0005874	microtubule	cellular_component	0.938305	1	1	278	152	16315	CLIP1
GO:0005216	ion channel activity	molecular_function	0.949285	1	3	278	352	16315	KCNA7
GO:0030246	carbohydrate binding	molecular_function	0.953351	1	1	278	171	16315	GANC
GO:0003735	structural constituent of ribosome	molecular_function	0.956008	1	1	278	206	16315	ENSSSCG00000024398
GO:0005840	ribosome	cellular_component	0.971107	1	1	278	231	16315	ENSSSCG00000024398
GO:0006281	DNA repair	biological_process	0.973616	1	1	278	203	16315	ENSSSCG00000007999
GO:0005524	ATP binding	molecular_function	0.976547	1	15	278	1291	16315	PFKFB1,PFKFB1,PKDCC,CKMT2,PMVK,AK1,CARNS1,SRPK3,DDX3X,HSPA2,DYRK1B,SLK,MAPK6,HIPK3,MYH1,DDX46
GO:0005215	transporter activity	molecular_function	0.988495	1	10	278	1035	16315	SLC37A4,SLC37A4
GO:0016021	integral to membrane	cellular_component	0.998383	1	36	278	3390	16315	ADCY2,ADORA1,SLA-DRA1,NNT,KCNN1,ST3GAL1,ST3GAL1,MT-ND5,SLC25A34,PRR2,PRR2,KCNA7,SLC7A8,SLC7A8,SLC16A3,ENSSSCG00000017381,SLC37A4,SLC37A4,MT-CO1,CD36,CD36,SLC25A32,DAG1,SCARB2,GHR,KIAA1919,SLA-DQA1,SIAT7B,TECR,TSPAN9,NADH4,SLA-10,SLA-10,SCD,HIGD2A,HBEGF,ENSSSCG00000027613,PLN
GO:0004871	signal transducer activity	molecular_function	0.999943	1	12	278	1951	16315	ADORA1,STAT5B,GAB1,PER1
GO:0004872	receptor activity	molecular_function	0.999989	1	10	278	1902	16315	SCARB2
GO:0007186	G-protein coupled receptor signaling pathway	biological_process	1	1	5	278	1676	16315	ADORA1,APOC3,APOA1,APOE
GO:0004930	G-protein coupled receptor activity	molecular_function	1	1	1	278	1275	16315	ADORA1
