# Supplementary material for: Comparison of differentially expressed genes in longissimus dorsi muscle of Diannan small ears, Wujin and landrace pigs using RNA-seq
Source: Front Vet Sci. 2024 Jan 5;10:1296208. doi: 10.3389/fvets.2023.1296208 (PMC10796741; doi:10.3389/fvets.2023.1296208)
Supplement: Supplementary file 10 [file Table_7.XLSX]

## Sheet: add.D54_D67_D74vsW17_W20_W21.in
Table S7. KEGG functional annotation of differentially expressed genes between DSE and WJ.xlsx
#Term	Database	Id	Sample number	Background number	P-Value	Corrected P-Value	Genes	KO	Entrez_ID	Ensembl_ID	KO_name	Hyperlink
Parkinson's disease	KEGG PATHWAY	ssc05012	11	110	0.00111164	0.120955	ENSSSCG00000008195|ENSSSCG00000023379|ENSSSCG00000016349|ENSSSCG00000027307|ENSSSCG00000018084|ENSSSCG00000018075|ENSSSCG00000003261|ENSSSCG00000006166|ENSSSCG00000011356|ENSSSCG00000012896|ENSSSCG00000005528	ssc:492822|ssc:100154268|ssc:100521478|ssc:100514033|ssc:808508|ssc:808503|ssc:100520312|ssc:448979|ssc:100156879|ssc:100522783|ssc:100154443|	| | | | | | | | | | |	492822|100154268|100521478|100514033|808508|808503|100520312|448979|100156879|100522783|100154443|	Cox5b|UBE2L3| |NDUFA11|ND3|COX1| |NDUFB8| | |NDUFA8|	http://www.genome.jp/kegg-bin/show_pathway?ssc05012
Fatty acid metabolism	KEGG PATHWAY	ssc00071	6	36	0.00111603	0.120955	ENSSSCG00000020972|ENSSSCG00000012583|ENSSSCG00000003851|ENSSSCG00000024752|ENSSSCG00000008571|ENSSSCG00000001000	ssc:100520636|ssc:448980|ssc:100519491|ssc:733685|ssc:397012|ssc:100134957|	| | | | | |	100520636|448980|100519491|733685|397012|100134957|	|ACSL4|CPT2|ALDH2|HADHA|ECI2, PECI|	http://www.genome.jp/kegg-bin/show_pathway?ssc00071
Alzheimer's disease	KEGG PATHWAY	ssc05010	12	132	0.0015507	0.120955	ENSSSCG00000012022|ENSSSCG00000016349|ENSSSCG00000027307|ENSSSCG00000008195|ENSSSCG00000027344|ENSSSCG00000018075|ENSSSCG00000029328|ENSSSCG00000003261|ENSSSCG00000006166|ENSSSCG00000011356|ENSSSCG00000012896|ENSSSCG00000005528	ssc:397663|ssc:100521478|ssc:100514033|ssc:492822|ssc:396875|ssc:808503|ssc:595129|ssc:100520312|ssc:448979|ssc:100156879|ssc:100522783|ssc:100154443|	| | | | | | | | | | | |	397663|100521478|100514033|492822|396875|808503|595129|100520312|448979|100156879|100522783|100154443|	APP| |NDUFA11|Cox5b|ATP2A2, ATP2, SERCA2|COX1|FADD| |NDUFB8| | |NDUFA8|	http://www.genome.jp/kegg-bin/show_pathway?ssc05010
Oxidative phosphorylation	KEGG PATHWAY	ssc00190	10	106	0.00284845	0.166635	ENSSSCG00000008195|ENSSSCG00000016349|ENSSSCG00000027307|ENSSSCG00000018084|ENSSSCG00000018075|ENSSSCG00000003261|ENSSSCG00000006166|ENSSSCG00000011356|ENSSSCG00000012896|ENSSSCG00000005528	ssc:492822|ssc:100521478|ssc:100514033|ssc:808508|ssc:808503|ssc:100520312|ssc:448979|ssc:100156879|ssc:100522783|ssc:100154443|	| | | | | | | | | |	492822|100521478|100514033|808508|808503|100520312|448979|100156879|100522783|100154443|	Cox5b| |NDUFA11|ND3|COX1| |NDUFB8| | |NDUFA8|	http://www.genome.jp/kegg-bin/show_pathway?ssc00190
Peroxisome	KEGG PATHWAY	ssc04146	6	52	0.00745297	0.341404	ENSSSCG00000028943|ENSSSCG00000012583|ENSSSCG00000016466|ENSSSCG00000002013|ENSSSCG00000001000|ENSSSCG00000023513	ssc:733679|ssc:448980|ssc:100521480|ssc:397082|ssc:100134957|ssc:100134962|	| | | | | |	733679|448980|100521480|397082|100134957|100134962|	ECH1|ACSL4| |DHRS4, PSCD|ECI2, PECI|PHYH|	http://www.genome.jp/kegg-bin/show_pathway?ssc04146
Viral myocarditis	KEGG PATHWAY	ssc05416	6	55	0.00976335	0.341404	ENSSSCG00000013405|ENSSSCG00000005706|ENSSSCG00000027341|ENSSSCG00000001453|ENSSSCG00000001227|ENSSSCG00000001231|ENSSSCG00000017583	ssc:100520826|ssc:100524544|ssc:396903|ssc:100135040|ssc:100135029|ssc:100135029|ssc:100240723|	| | | | | | |	100520826|100524544|396903|100135040|100135029|100135029|100240723|	|ABL1| |SLA-DRA, SLA-DR-alpha, SLA-DRA1|SLA-5, SLA-1, SLA-5b|SLA-5, SLA-1, SLA-5b|SGCA|	http://www.genome.jp/kegg-bin/show_pathway?ssc05416
Proteasome	KEGG PATHWAY	ssc03050	5	40	0.010213	0.341404	ENSSSCG00000020769|ENSSSCG00000011494|ENSSSCG00000006623|ENSSSCG00000023998|ENSSSCG00000008412	ssc:100513739|ssc:100519870|ssc:100153923|ssc:100153828|ssc:100517820|	| | | | |	100513739|100519870|100153923|100153828|100517820|	|PSMD6|PSMB4|PSMD1|PSME4|	http://www.genome.jp/kegg-bin/show_pathway?ssc03050
Cysteine and methionine metabolism	KEGG PATHWAY	ssc00270	4	27	0.0117201	0.342813	ENSSSCG00000013366|ENSSSCG00000004392|ENSSSCG00000010143|ENSSSCG00000022300	ssc:407245|ssc:100155925|ssc:397300|ssc:100312974|	| | | |	407245|100155925|397300|100312974|	LDHA, LDH-A, LDH-M| |MTR|MAT2A, MATA2|	http://www.genome.jp/kegg-bin/show_pathway?ssc00270
Arginine and proline metabolism	KEGG PATHWAY	ssc00330	4	38	0.0370514	0.878707	ENSSSCG00000024752|ENSSSCG00000004392|ENSSSCG00000010495|ENSSSCG00000027121	ssc:733685|ssc:100155925|ssc:100151977|ssc:414408|	| | | |	733685|100155925|100151977|414408|	ALDH2| |ALDH18A1|ODC, ODC1|	http://www.genome.jp/kegg-bin/show_pathway?ssc00330
Phosphatidylinositol signaling system	KEGG PATHWAY	ssc04070	5	56	0.0385567	0.878707	ENSSSCG00000030707|ENSSSCG00000013259|ENSSSCG00000027629|ENSSSCG00000002457|ENSSSCG00000015283	ssc:100462756|ssc:100519533|ssc:100312963|ssc:100152339|ssc:100512551|	| | | | |	100462756|100519533|100312963|100152339|100512551|	INPP5K, SKIP|DGKZ|CDIPT|ITPK1|PIK3C2B|	http://www.genome.jp/kegg-bin/show_pathway?ssc04070
Selenocompound metabolism	KEGG PATHWAY	ssc00450	2	10	0.0419506	0.878707	ENSSSCG00000010143|ENSSSCG00000005663	ssc:397300|ssc:100515071|	| |	397300|100515071|	MTR|CCBL1|	http://www.genome.jp/kegg-bin/show_pathway?ssc00450
Huntington's disease	KEGG PATHWAY	ssc05016	9	140	0.0451337	0.878707	ENSSSCG00000008195|ENSSSCG00000016349|ENSSSCG00000027307|ENSSSCG00000018075|ENSSSCG00000003261|ENSSSCG00000006166|ENSSSCG00000011356|ENSSSCG00000012896|ENSSSCG00000005528	ssc:492822|ssc:100521478|ssc:100514033|ssc:808503|ssc:100520312|ssc:448979|ssc:100156879|ssc:100522783|ssc:100154443|	| | | | | | | | |	492822|100521478|100514033|808503|100520312|448979|100156879|100522783|100154443|	Cox5b| |NDUFA11|COX1| |NDUFB8| | |NDUFA8|	http://www.genome.jp/kegg-bin/show_pathway?ssc05016
Propanoate metabolism	KEGG PATHWAY	ssc00640	3	25	0.0494127	0.878707	ENSSSCG00000013366|ENSSSCG00000024752|ENSSSCG00000008571	ssc:407245|ssc:733685|ssc:397012|	| | |	407245|733685|397012|	LDHA, LDH-A, LDH-M|ALDH2|HADHA|	http://www.genome.jp/kegg-bin/show_pathway?ssc00640
Antigen processing and presentation	KEGG PATHWAY	ssc04612	5	61	0.0525722	0.878707	ENSSSCG00000001227|ENSSSCG00000001231|ENSSSCG00000001453|ENSSSCG00000002274|ENSSSCG00000002452|ENSSSCG00000001701	ssc:100135029|ssc:100135029|ssc:100135040|ssc:396648|ssc:100154749|ssc:396742|	| | | | | |	100135029|100135029|100135040|396648|100154749|396742|	SLA-5, SLA-1, SLA-5b|SLA-5, SLA-1, SLA-5b|SLA-DRA, SLA-DR-alpha, SLA-DRA1|HSP70.2, HSPA1A, HSPA1B| |HSPCB|	http://www.genome.jp/kegg-bin/show_pathway?ssc04612
Inositol phosphate metabolism	KEGG PATHWAY	ssc00562	4	46	0.0667314	1	ENSSSCG00000030707|ENSSSCG00000027629|ENSSSCG00000002457|ENSSSCG00000015283	ssc:100462756|ssc:100312963|ssc:100152339|ssc:100512551|	| | | |	100462756|100312963|100152339|100512551|	INPP5K, SKIP|CDIPT|ITPK1|PIK3C2B|	http://www.genome.jp/kegg-bin/show_pathway?ssc00562
Tryptophan metabolism	KEGG PATHWAY	ssc00380	3	30	0.0773117	1	ENSSSCG00000024752|ENSSSCG00000008571|ENSSSCG00000005663	ssc:733685|ssc:397012|ssc:100515071|	| | |	733685|397012|100515071|	ALDH2|HADHA|CCBL1|	http://www.genome.jp/kegg-bin/show_pathway?ssc00380
Pentose and glucuronate interconversions	KEGG PATHWAY	ssc00040	2	14	0.077746	1	ENSSSCG00000024752|ENSSSCG00000008368	ssc:733685|ssc:397040|	| |	733685|397040|	ALDH2|UGP2|	http://www.genome.jp/kegg-bin/show_pathway?ssc00040
Ribosome	KEGG PATHWAY	ssc03010	5	70	0.0843424	1	ENSSSCG00000024398|ENSSSCG00000027441|ENSSSCG00000024260|ENSSSCG00000014133|ENSSSCG00000005003	ssc:780432|ssc:100511261|ssc:414422|ssc:396638|ssc:414391|	| | | | |	780432|100511261|414422|396638|414391|	RPL13A| |RPL11|RPS23|RPS29|	http://www.genome.jp/kegg-bin/show_pathway?ssc03010
Gap junction	KEGG PATHWAY	ssc04540	4	53	0.100282	1	ENSSSCG00000009134|ENSSSCG00000000190|ENSSSCG00000005849|ENSSSCG00000001006|ENSSSCG00000016216	ssc:397083|ssc:733594|ssc:733686|ssc:733686|ssc:100158003|	| | | | |	397083|733594|733686|733686|100158003|	EGF|TUBA1B, TUBA3|TUBB2A, TUBB|TUBB2A, TUBB|TUBA1A|	http://www.genome.jp/kegg-bin/show_pathway?ssc04540
Phagosome	KEGG PATHWAY	ssc04145	7	119	0.103584	1	ENSSSCG00000016216|ENSSSCG00000004789|ENSSSCG00000001453|ENSSSCG00000001227|ENSSSCG00000001231|ENSSSCG00000005849|ENSSSCG00000001006|ENSSSCG00000000675|ENSSSCG00000000190	ssc:100158003|ssc:492313|ssc:100135040|ssc:100135029|ssc:100135029|ssc:733686|ssc:733686|ssc:445464|ssc:733594|	| | | | | | | | |	100158003|492313|100135040|100135029|100135029|733686|733686|445464|733594|	TUBA1A|THBS1|SLA-DRA, SLA-DR-alpha, SLA-DRA1|SLA-5, SLA-1, SLA-5b|SLA-5, SLA-1, SLA-5b|TUBB2A, TUBB|TUBB2A, TUBB|C1R|TUBA1B, TUBA3|	http://www.genome.jp/kegg-bin/show_pathway?ssc04145
Galactose metabolism	KEGG PATHWAY	ssc00052	2	18	0.119922	1	ENSSSCG00000004729|ENSSSCG00000008368	ssc:100513637|ssc:397040|	| |	100513637|397040|	GANC|UGP2|	http://www.genome.jp/kegg-bin/show_pathway?ssc00052
Glutathione metabolism	KEGG PATHWAY	ssc00480	3	38	0.132779	1	ENSSSCG00000016466|ENSSSCG00000003867|ENSSSCG00000027121	ssc:100521480|ssc:100517534|ssc:414408|	| | |	100521480|100517534|414408|	| |ODC, ODC1|	http://www.genome.jp/kegg-bin/show_pathway?ssc00480
Cardiac muscle contraction	KEGG PATHWAY	ssc04260	4	59	0.134081	1	ENSSSCG00000008195|ENSSSCG00000011356|ENSSSCG00000018075|ENSSSCG00000015402	ssc:492822|ssc:100156879|ssc:808503|ssc:397377|	| | | |	492822|100156879|808503|397377|	Cox5b| |COX1|CACNA2D1|	http://www.genome.jp/kegg-bin/show_pathway?ssc04260
Complement and coagulation cascades	KEGG PATHWAY	ssc04610	4	60	0.140118	1	ENSSSCG00000000675|ENSSSCG00000003524|ENSSSCG00000024791|ENSSSCG00000025698	ssc:445464|ssc:445461|ssc:397347|ssc:396945|	| | | |	445464|445461|397347|396945|	C1R|C1QA|CD59|SERPINE1, PLANH1|	http://www.genome.jp/kegg-bin/show_pathway?ssc04610
ErbB signaling pathway	KEGG PATHWAY	ssc04012	4	60	0.140118	1	ENSSSCG00000009134|ENSSSCG00000005706|ENSSSCG00000013735|ENSSSCG00000017406	ssc:397083|ssc:100524544|ssc:396913|ssc:397340|	| | | |	397083|100524544|396913|397340|	EGF|ABL1|C-JUN, Jun|STAT5B|	http://www.genome.jp/kegg-bin/show_pathway?ssc04012
Protein export	KEGG PATHWAY	ssc03060	2	20	0.142699	1	ENSSSCG00000015769|ENSSSCG00000015227	ssc:100526140|ssc:100513370|	| |	100526140|100513370|	|SRPR|	http://www.genome.jp/kegg-bin/show_pathway?ssc03060
Butanoate metabolism	KEGG PATHWAY	ssc00650	2	20	0.142699	1	ENSSSCG00000026453|ENSSSCG00000008571	ssc:100511318|ssc:397012|	| |	100511318|397012|	ACSM5|HADHA|	http://www.genome.jp/kegg-bin/show_pathway?ssc00650
beta-Alanine metabolism	KEGG PATHWAY	ssc00410	2	21	0.154404	1	ENSSSCG00000024752|ENSSSCG00000008571	ssc:733685|ssc:397012|	| |	733685|397012|	ALDH2|HADHA|	http://www.genome.jp/kegg-bin/show_pathway?ssc00410
Focal adhesion	KEGG PATHWAY	ssc04510	7	133	0.157313	1	ENSSSCG00000016578|ENSSSCG00000013735|ENSSSCG00000009134|ENSSSCG00000003691|ENSSSCG00000004789|ENSSSCG00000015444|ENSSSCG00000010313	ssc:100518997|ssc:396913|ssc:397083|ssc:414399|ssc:492313|ssc:396707|ssc:396974|	| | | | | | |	100518997|396913|397083|414399|492313|396707|396974|	FLNC|C-JUN, Jun|EGF|MRLC2|THBS1|LAMB1|VCL|	http://www.genome.jp/kegg-bin/show_pathway?ssc04510
Hypertrophic cardiomyopathy (HCM)	KEGG PATHWAY	ssc05410	4	64	0.165296	1	ENSSSCG00000017583|ENSSSCG00000020785|ENSSSCG00000000185|ENSSSCG00000015402	ssc:100240723|ssc:396725|ssc:414426|ssc:397377|	| | | |	100240723|396725|414426|397377|	SGCA|DES|PRKAG1|CACNA2D1|	http://www.genome.jp/kegg-bin/show_pathway?ssc05410
Fructose and mannose metabolism	KEGG PATHWAY	ssc00051	2	23	0.178319	1	ENSSSCG00000012345|ENSSSCG00000024219	ssc:100233197|ssc:100154112|	| |	100233197|100154112|	PFKFB1| |	http://www.genome.jp/kegg-bin/show_pathway?ssc00051
Staphylococcus aureus infection	KEGG PATHWAY	ssc05150	3	45	0.189556	1	ENSSSCG00000000675|ENSSSCG00000001453|ENSSSCG00000003524	ssc:445464|ssc:100135040|ssc:445461|	| | |	445464|100135040|445461|	C1R|SLA-DRA, SLA-DR-alpha, SLA-DRA1|C1QA|	http://www.genome.jp/kegg-bin/show_pathway?ssc05150
Metabolic pathways	KEGG PATHWAY	ssc01100	32	823	0.20806	1	ENSSSCG00000022300|ENSSSCG00000018084|ENSSSCG00000027629|ENSSSCG00000002457|ENSSSCG00000013259|ENSSSCG00000027121|ENSSSCG00000024752|ENSSSCG00000026453|ENSSSCG00000027307|ENSSSCG00000008195|ENSSSCG00000004729|ENSSSCG00000016349|ENSSSCG00000005663|ENSSSCG00000006166|ENSSSCG00000005528|ENSSSCG00000020972|ENSSSCG00000010495|ENSSSCG00000030707|ENSSSCG00000002013|ENSSSCG00000011356|ENSSSCG00000008368|…	ssc:100312974|ssc:808508|ssc:100312963|ssc:100152339|ssc:100519533|ssc:414408|ssc:733685|ssc:100511318|ssc:100514033|ssc:492822|ssc:100513637|ssc:100521478|ssc:100515071|ssc:448979|ssc:100154443|ssc:100520636|ssc:100151977|ssc:100462756|ssc:397082|ssc:100156879|ssc:397040|ssc:100154856|ssc:407245|ssc:808503|ssc:100155925|ssc:448980|ssc:397012|ssc:397300|ssc:100520312|ssc:100512551|ssc:100522783|s…	| | | | | | | | | | | | | | | | | | | | | | | | | | | | | | | |	100312974|808508|100312963|100152339|100519533|414408|733685|100511318|100514033|492822|100513637|100521478|100515071|448979|100154443|100520636|100151977|100462756|397082|100156879|397040|100154856|407245|808503|100155925|448980|397012|397300|100520312|100512551|100522783|100512870|	MAT2A, MATA2|ND3|CDIPT|ITPK1|DGKZ|ODC, ODC1|ALDH2|ACSM5|NDUFA11|Cox5b|GANC| |CCBL1|NDUFB8|NDUFA8| |ALDH18A1|INPP5K, SKIP|DHRS4, PSCD| |UGP2| |LDHA, LDH-A, LDH-M|COX1| |ACSL4|HADHA|MTR| |PIK3C2B| |MOCS2|	http://www.genome.jp/kegg-bin/show_pathway?ssc01100
Folate biosynthesis	KEGG PATHWAY	ssc00790	1	7	0.211704	1	ENSSSCG00000016888	ssc:100512870|	|	100512870|	MOCS2|	http://www.genome.jp/kegg-bin/show_pathway?ssc00790
Starch and sucrose metabolism	KEGG PATHWAY	ssc00500	2	27	0.227516	1	ENSSSCG00000004729|ENSSSCG00000008368	ssc:100513637|ssc:397040|	| |	100513637|397040|	GANC|UGP2|	http://www.genome.jp/kegg-bin/show_pathway?ssc00500
Regulation of autophagy	KEGG PATHWAY	ssc04140	2	28	0.239982	1	ENSSSCG00000013644|ENSSSCG00000013645|ENSSSCG00000017386	ssc:100141400|ssc:100141400|ssc:733576|	| | |	100141400|100141400|733576|	ATG4D, APG4D, FLJ12949|ATG4D, APG4D, FLJ12949|BECN1, ATG6|	http://www.genome.jp/kegg-bin/show_pathway?ssc04140
Pyruvate metabolism	KEGG PATHWAY	ssc00620	2	28	0.239982	1	ENSSSCG00000013366|ENSSSCG00000024752	ssc:407245|ssc:733685|	| |	407245|733685|	LDHA, LDH-A, LDH-M|ALDH2|	http://www.genome.jp/kegg-bin/show_pathway?ssc00620
RNA degradation	KEGG PATHWAY	ssc03018	3	51	0.242192	1	ENSSSCG00000017558|ENSSSCG00000028322|ENSSSCG00000002799	ssc:100144440|ssc:100048932|ssc:100511993|	| | |	100144440|100048932|100511993|	TOB1|BTG2|CNOT1|	http://www.genome.jp/kegg-bin/show_pathway?ssc03018
RNA transport	KEGG PATHWAY	ssc03013	5	101	0.248488	1	ENSSSCG00000010973|ENSSSCG00000017957|ENSSSCG00000016034|ENSSSCG00000013405|ENSSSCG00000026034	ssc:100522095|ssc:100101929|ssc:100152001|ssc:100520826|ssc:100153581|	| | | | |	100522095|100101929|100152001|100520826|100153581|	|EIF4A1|COL3A1| |NUP153|	http://www.genome.jp/kegg-bin/show_pathway?ssc03013
Lysine degradation	KEGG PATHWAY	ssc00310	2	29	0.252479	1	ENSSSCG00000024752|ENSSSCG00000008571	ssc:733685|ssc:397012|	| |	733685|397012|	ALDH2|HADHA|	http://www.genome.jp/kegg-bin/show_pathway?ssc00310
MAPK signaling pathway	KEGG PATHWAY	ssc04010	8	180	0.25445	1	ENSSSCG00000016578|ENSSSCG00000010831|ENSSSCG00000013735|ENSSSCG00000015402|ENSSSCG00000002274|ENSSSCG00000008509|ENSSSCG00000003160|ENSSSCG00000009134	ssc:100518997|ssc:100517416|ssc:396913|ssc:397377|ssc:396648|ssc:100511446|ssc:100511085|ssc:397083|	| | | | | | | |	100518997|100517416|396913|397377|396648|100511446|100511085|397083|	FLNC|DUSP10|C-JUN, Jun|CACNA2D1|HSP70.2, HSPA1A, HSPA1B|RASGRP3|NTF4|EGF|	http://www.genome.jp/kegg-bin/show_pathway?ssc04010
Glycosaminoglycan biosynthesis - keratan sulfate	KEGG PATHWAY	ssc00533	1	9	0.263519	1	ENSSSCG00000006360	ssc:100154856|	|	100154856|	|	http://www.genome.jp/kegg-bin/show_pathway?ssc00533
Circadian rhythm - mammal	KEGG PATHWAY	ssc04710	1	9	0.263519	1	ENSSSCG00000028552	ssc:100514873|	|	100514873|	BHLHE40|	http://www.genome.jp/kegg-bin/show_pathway?ssc04710
Sulfur relay system	KEGG PATHWAY	ssc04122	1	9	0.263519	1	ENSSSCG00000016888	ssc:100512870|	|	100512870|	MOCS2|	http://www.genome.jp/kegg-bin/show_pathway?ssc04122
Influenza A	KEGG PATHWAY	ssc05164	6	131	0.273663	1	ENSSSCG00000015570|ENSSSCG00000013735|ENSSSCG00000002274|ENSSSCG00000001453|ENSSSCG00000013784|ENSSSCG00000020906	ssc:100302027|ssc:396913|ssc:396648|ssc:100135040|ssc:396741|ssc:406191|	| | | | | |	100302027|396913|396648|100135040|396741|406191|	IVNS1ABP|C-JUN, Jun|HSP70.2, HSPA1A, HSPA1B|SLA-DRA, SLA-DR-alpha, SLA-DRA1|DNAJB1, HSPF1|TNFSF10, TRAIL|	http://www.genome.jp/kegg-bin/show_pathway?ssc05164
Arrhythmogenic right ventricular cardiomyopathy (ARVC)	KEGG PATHWAY	ssc05412	3	55	0.278482	1	ENSSSCG00000017583|ENSSSCG00000020785|ENSSSCG00000015402	ssc:100240723|ssc:396725|ssc:397377|	| | |	100240723|396725|397377|	SGCA|DES|CACNA2D1|	http://www.genome.jp/kegg-bin/show_pathway?ssc05412
Systemic lupus erythematosus	KEGG PATHWAY	ssc05322	4	81	0.285815	1	ENSSSCG00000000675|ENSSSCG00000001453|ENSSSCG00000003524|ENSSSCG00000021411	ssc:445464|ssc:100135040|ssc:445461|ssc:100156127|	| | | |	445464|100135040|445461|100156127|	C1R|SLA-DRA, SLA-DR-alpha, SLA-DRA1|C1QA| |	http://www.genome.jp/kegg-bin/show_pathway?ssc05322
Adipocytokine signaling pathway	KEGG PATHWAY	ssc04920	3	56	0.287643	1	ENSSSCG00000021155|ENSSSCG00000000185|ENSSSCG00000012583	ssc:396863|ssc:414426|ssc:448980|	| | |	396863|414426|448980|	POMC|PRKAG1|ACSL4|	http://www.genome.jp/kegg-bin/show_pathway?ssc04920
Ribosome biogenesis in eukaryotes	KEGG PATHWAY	ssc03008	3	57	0.296826	1	ENSSSCG00000012654|ENSSSCG00000010973|ENSSSCG00000001876	ssc:100523416|ssc:100522095|ssc:100151831|	| | |	100523416|100522095|100151831|	| |IMP3|	http://www.genome.jp/kegg-bin/show_pathway?ssc03008
Valine, leucine and isoleucine degradation	KEGG PATHWAY	ssc00280	2	34	0.314905	1	ENSSSCG00000024752|ENSSSCG00000008571	ssc:733685|ssc:397012|	| |	733685|397012|	ALDH2|HADHA|	http://www.genome.jp/kegg-bin/show_pathway?ssc00280
PPAR signaling pathway	KEGG PATHWAY	ssc03320	3	59	0.315238	1	ENSSSCG00000003851|ENSSSCG00000013599|ENSSSCG00000012583	ssc:100519491|ssc:397628|ssc:448980|	| | |	100519491|397628|448980|	CPT2|ANGPTL4, PGAR|ACSL4|	http://www.genome.jp/kegg-bin/show_pathway?ssc03320
Pertussis	KEGG PATHWAY	ssc05133	3	59	0.315238	1	ENSSSCG00000000675|ENSSSCG00000003524|ENSSSCG00000013735	ssc:445464|ssc:445461|ssc:396913|	| | |	445464|445461|396913|	C1R|C1QA|C-JUN, Jun|	http://www.genome.jp/kegg-bin/show_pathway?ssc05133
Salmonella infection	KEGG PATHWAY	ssc05132	3	60	0.324455	1	ENSSSCG00000016578|ENSSSCG00000013735|ENSSSCG00000017906	ssc:100518997|ssc:396913|ssc:100512494|	| | |	100518997|396913|100512494|	FLNC|C-JUN, Jun|PFN1|	http://www.genome.jp/kegg-bin/show_pathway?ssc05132
Graft-versus-host disease	KEGG PATHWAY	ssc05332	2	35	0.327287	1	ENSSSCG00000001453|ENSSSCG00000001227|ENSSSCG00000001231	ssc:100135040|ssc:100135029|ssc:100135029|	| | |	100135040|100135029|100135029|	SLA-DRA, SLA-DR-alpha, SLA-DRA1|SLA-5, SLA-1, SLA-5b|SLA-5, SLA-1, SLA-5b|	http://www.genome.jp/kegg-bin/show_pathway?ssc05332
One carbon pool by folate	KEGG PATHWAY	ssc00670	1	12	0.334939	1	ENSSSCG00000010143	ssc:397300|	|	397300|	MTR|	http://www.genome.jp/kegg-bin/show_pathway?ssc00670
Lysosome	KEGG PATHWAY	ssc04142	4	88	0.338912	1	ENSSSCG00000002452|ENSSSCG00000024437|ENSSSCG00000030174|ENSSSCG00000002366	ssc:100154749|ssc:100511918|ssc:100153862|ssc:397410|	| | | |	100154749|100511918|100153862|397410|	|AP1M1|AP3S2|NPC2|	http://www.genome.jp/kegg-bin/show_pathway?ssc04142
Endometrial cancer	KEGG PATHWAY	ssc05213	2	36	0.339608	1	ENSSSCG00000024866|ENSSSCG00000009134	ssc:100517932|ssc:397083|	| |	100517932|397083|	APC, APC1|EGF|	http://www.genome.jp/kegg-bin/show_pathway?ssc05213
Spliceosome	KEGG PATHWAY	ssc03040	4	89	0.346547	1	ENSSSCG00000026644|ENSSSCG00000001564|ENSSSCG00000012957|ENSSSCG00000002274	ssc:100512557|ssc:100523801|ssc:100522004|ssc:396648|	| | | |	100512557|100523801|100522004|396648|	DDX42| |SF3B2|HSP70.2, HSPA1A, HSPA1B|	http://www.genome.jp/kegg-bin/show_pathway?ssc03040
Chagas disease (American trypanosomiasis)	KEGG PATHWAY	ssc05142	4	90	0.354184	1	ENSSSCG00000029328|ENSSSCG00000003524|ENSSSCG00000013735|ENSSSCG00000025698	ssc:595129|ssc:445461|ssc:396913|ssc:396945|	| | | |	595129|445461|396913|396945|	FADD|C1QA|C-JUN, Jun|SERPINE1, PLANH1|	http://www.genome.jp/kegg-bin/show_pathway?ssc05142
Endocytosis	KEGG PATHWAY	ssc04144	6	145	0.355952	1	ENSSSCG00000004919|ENSSSCG00000012160|ENSSSCG00000009134|ENSSSCG00000002274|ENSSSCG00000001227|ENSSSCG00000001231|ENSSSCG00000028889	ssc:100154192|ssc:100522530|ssc:397083|ssc:396648|ssc:100135029|ssc:100135029|ssc:100152918|	| | | | | | |	100154192|100522530|397083|396648|100135029|100135029|100152918|	|SH3KBP1|EGF|HSP70.2, HSPA1A, HSPA1B|SLA-5, SLA-1, SLA-5b|SLA-5, SLA-1, SLA-5b|VPS37B|	http://www.genome.jp/kegg-bin/show_pathway?ssc04144
Biosynthesis of unsaturated fatty acids	KEGG PATHWAY	ssc01040	1	13	0.357175	1	ENSSSCG00000008571	ssc:397012|	|	397012|	HADHA|	http://www.genome.jp/kegg-bin/show_pathway?ssc01040
Ascorbate and aldarate metabolism	KEGG PATHWAY	ssc00053	1	13	0.357175	1	ENSSSCG00000024752	ssc:733685|	|	733685|	ALDH2|	http://www.genome.jp/kegg-bin/show_pathway?ssc00053
Dilated cardiomyopathy	KEGG PATHWAY	ssc05414	3	64	0.361271	1	ENSSSCG00000017583|ENSSSCG00000020785|ENSSSCG00000015402	ssc:100240723|ssc:396725|ssc:397377|	| | |	100240723|396725|397377|	SGCA|DES|CACNA2D1|	http://www.genome.jp/kegg-bin/show_pathway?ssc05414
Allograft rejection	KEGG PATHWAY	ssc05330	2	39	0.376113	1	ENSSSCG00000001453|ENSSSCG00000001227|ENSSSCG00000001231	ssc:100135040|ssc:100135029|ssc:100135029|	| | |	100135040|100135029|100135029|	SLA-DRA, SLA-DR-alpha, SLA-DRA1|SLA-5, SLA-1, SLA-5b|SLA-5, SLA-1, SLA-5b|	http://www.genome.jp/kegg-bin/show_pathway?ssc05330
Pathways in cancer	KEGG PATHWAY	ssc05200	9	235	0.385922	1	ENSSSCG00000024866|ENSSSCG00000009134|ENSSSCG00000013735|ENSSSCG00000001701|ENSSSCG00000017406|ENSSSCG00000005706|ENSSSCG00000009370|ENSSSCG00000029328|ENSSSCG00000015444	ssc:100517932|ssc:397083|ssc:396913|ssc:396742|ssc:397340|ssc:100524544|ssc:397077|ssc:595129|ssc:396707|	| | | | | | | | |	100517932|397083|396913|396742|397340|100524544|397077|595129|396707|	APC, APC1|EGF|C-JUN, Jun|HSPCB|STAT5B|ABL1|FOXO1, FOXO1A|FADD|LAMB1|	http://www.genome.jp/kegg-bin/show_pathway?ssc05200
Glycolysis / Gluconeogenesis	KEGG PATHWAY	ssc00010	2	41	0.399986	1	ENSSSCG00000013366|ENSSSCG00000024752	ssc:407245|ssc:733685|	| |	407245|733685|	LDHA, LDH-A, LDH-M|ALDH2|	http://www.genome.jp/kegg-bin/show_pathway?ssc00010
Prostate cancer	KEGG PATHWAY	ssc05215	3	69	0.406818	1	ENSSSCG00000009134|ENSSSCG00000009370|ENSSSCG00000001701	ssc:397083|ssc:397077|ssc:396742|	| | |	397083|397077|396742|	EGF|FOXO1, FOXO1A|HSPCB|	http://www.genome.jp/kegg-bin/show_pathway?ssc05215
Dorso-ventral axis formation	KEGG PATHWAY	ssc04320	1	16	0.419531	1	ENSSSCG00000012068	ssc:100154449|	|	100154449|	|	http://www.genome.jp/kegg-bin/show_pathway?ssc04320
Phenylalanine metabolism	KEGG PATHWAY	ssc00360	1	16	0.419531	1	ENSSSCG00000010067	ssc:397412|	|	397412|	MIF|	http://www.genome.jp/kegg-bin/show_pathway?ssc00360
Type I diabetes mellitus	KEGG PATHWAY	ssc04940	2	43	0.423422	1	ENSSSCG00000001453|ENSSSCG00000001227|ENSSSCG00000001231	ssc:100135040|ssc:100135029|ssc:100135029|	| | |	100135040|100135029|100135029|	SLA-DRA, SLA-DR-alpha, SLA-DRA1|SLA-5, SLA-1, SLA-5b|SLA-5, SLA-1, SLA-5b|	http://www.genome.jp/kegg-bin/show_pathway?ssc04940
Glycerolipid metabolism	KEGG PATHWAY	ssc00561	2	43	0.423422	1	ENSSSCG00000024752|ENSSSCG00000013259	ssc:733685|ssc:100519533|	| |	733685|100519533|	ALDH2|DGKZ|	http://www.genome.jp/kegg-bin/show_pathway?ssc00561
Protein processing in endoplasmic reticulum	KEGG PATHWAY	ssc04141	5	128	0.426007	1	ENSSSCG00000013784|ENSSSCG00000012784|ENSSSCG00000002274|ENSSSCG00000016017|ENSSSCG00000001701	ssc:396741|ssc:100523300|ssc:396648|ssc:100523288|ssc:396742|	| | | | |	396741|100523300|396648|100523288|396742|	DNAJB1, HSPF1| |HSP70.2, HSPA1A, HSPA1B|DNAJC10|HSPCB|	http://www.genome.jp/kegg-bin/show_pathway?ssc04141
Vitamin digestion and absorption	KEGG PATHWAY	ssc04977	1	17	0.438945	1	ENSSSCG00000006290	ssc:100155620|	|	100155620|	|	http://www.genome.jp/kegg-bin/show_pathway?ssc04977
Colorectal cancer	KEGG PATHWAY	ssc05210	2	46	0.45766	1	ENSSSCG00000024866|ENSSSCG00000013735	ssc:100517932|ssc:396913|	| |	100517932|396913|	APC, APC1|C-JUN, Jun|	http://www.genome.jp/kegg-bin/show_pathway?ssc05210
Fatty acid elongation	KEGG PATHWAY	ssc00062	1	18	0.457711	1	ENSSSCG00000008571	ssc:397012|	|	397012|	HADHA|	http://www.genome.jp/kegg-bin/show_pathway?ssc00062
HTLV-I infection	KEGG PATHWAY	ssc05166	7	194	0.472217	1	ENSSSCG00000024866|ENSSSCG00000013735|ENSSSCG00000012068|ENSSSCG00000017406|ENSSSCG00000001453|ENSSSCG00000001227|ENSSSCG00000001231|ENSSSCG00000011106	ssc:100517932|ssc:396913|ssc:100154449|ssc:397340|ssc:100135040|ssc:100135029|ssc:100135029|ssc:100512363|	| | | | | | | |	100517932|396913|100154449|397340|100135040|100135029|100135029|100512363|	APC, APC1|C-JUN, Jun| |STAT5B|SLA-DRA, SLA-DR-alpha, SLA-DRA1|SLA-5, SLA-1, SLA-5b|SLA-5, SLA-1, SLA-5b| |	http://www.genome.jp/kegg-bin/show_pathway?ssc05166
Glycosphingolipid biosynthesis - lacto and neolacto series	KEGG PATHWAY	ssc00601	1	19	0.475851	1	ENSSSCG00000006360	ssc:100154856|	|	100154856|	|	http://www.genome.jp/kegg-bin/show_pathway?ssc00601
Histidine metabolism	KEGG PATHWAY	ssc00340	1	19	0.475851	1	ENSSSCG00000024752	ssc:733685|	|	733685|	ALDH2|	http://www.genome.jp/kegg-bin/show_pathway?ssc00340
Autoimmune thyroid disease	KEGG PATHWAY	ssc05320	2	49	0.490693	1	ENSSSCG00000001453|ENSSSCG00000001227|ENSSSCG00000001231	ssc:100135040|ssc:100135029|ssc:100135029|	| | |	100135040|100135029|100135029|	SLA-DRA, SLA-DR-alpha, SLA-DRA1|SLA-5, SLA-1, SLA-5b|SLA-5, SLA-1, SLA-5b|	http://www.genome.jp/kegg-bin/show_pathway?ssc05320
Malaria	KEGG PATHWAY	ssc05144	2	49	0.490693	1	ENSSSCG00000004789|ENSSSCG00000017277	ssc:492313|ssc:396941|	| |	492313|396941|	THBS1|PECAM1, CD31, PECAM-1|	http://www.genome.jp/kegg-bin/show_pathway?ssc05144
Herpes simplex infection	KEGG PATHWAY	ssc05168	5	138	0.491127	1	ENSSSCG00000001453|ENSSSCG00000001564|ENSSSCG00000001227|ENSSSCG00000001231|ENSSSCG00000029328|ENSSSCG00000013735	ssc:100135040|ssc:100523801|ssc:100135029|ssc:100135029|ssc:595129|ssc:396913|	| | | | | |	100135040|100523801|100135029|100135029|595129|396913|	SLA-DRA, SLA-DR-alpha, SLA-DRA1| |SLA-5, SLA-1, SLA-5b|SLA-5, SLA-1, SLA-5b|FADD|C-JUN, Jun|	http://www.genome.jp/kegg-bin/show_pathway?ssc05168
Chronic myeloid leukemia	KEGG PATHWAY	ssc05220	2	51	0.512001	1	ENSSSCG00000017406|ENSSSCG00000005706	ssc:397340|ssc:100524544|	| |	397340|100524544|	STAT5B|ABL1|	http://www.genome.jp/kegg-bin/show_pathway?ssc05220
B cell receptor signaling pathway	KEGG PATHWAY	ssc04662	2	52	0.522433	1	ENSSSCG00000013735|ENSSSCG00000008509	ssc:396913|ssc:100511446|	| |	396913|100511446|	C-JUN, Jun|RASGRP3|	http://www.genome.jp/kegg-bin/show_pathway?ssc04662
Protein digestion and absorption	KEGG PATHWAY	ssc04974	2	53	0.532715	1	ENSSSCG00000002032|ENSSSCG00000022404	ssc:100522330|ssc:100144588|	| |	100522330|100144588|	|SLC3A1|	http://www.genome.jp/kegg-bin/show_pathway?ssc04974
Regulation of actin cytoskeleton	KEGG PATHWAY	ssc04810	5	146	0.54122	1	ENSSSCG00000024866|ENSSSCG00000017906|ENSSSCG00000010313|ENSSSCG00000009134|ENSSSCG00000003691	ssc:100517932|ssc:100512494|ssc:396974|ssc:397083|ssc:414399|	| | | | |	100517932|100512494|396974|397083|414399|	APC, APC1|PFN1|VCL|EGF|MRLC2|	http://www.genome.jp/kegg-bin/show_pathway?ssc04810
Other types of O-glycan biosynthesis	KEGG PATHWAY	ssc00514	1	23	0.542554	1	ENSSSCG00000006360	ssc:100154856|	|	100154856|	|	http://www.genome.jp/kegg-bin/show_pathway?ssc00514
Glycerophospholipid metabolism	KEGG PATHWAY	ssc00564	2	56	0.562641	1	ENSSSCG00000013259|ENSSSCG00000027629	ssc:100519533|ssc:100312963|	| |	100519533|100312963|	DGKZ|CDIPT|	http://www.genome.jp/kegg-bin/show_pathway?ssc00564
Leukocyte transendothelial migration	KEGG PATHWAY	ssc04670	3	88	0.567502	1	ENSSSCG00000017277|ENSSSCG00000010313|ENSSSCG00000003691	ssc:396941|ssc:396974|ssc:414399|	| | |	396941|396974|414399|	PECAM1, CD31, PECAM-1|VCL|MRLC2|	http://www.genome.jp/kegg-bin/show_pathway?ssc04670
Neurotrophin signaling pathway	KEGG PATHWAY	ssc04722	3	88	0.567502	1	ENSSSCG00000003160|ENSSSCG00000005706|ENSSSCG00000013735	ssc:100511085|ssc:100524544|ssc:396913|	| | |	100511085|100524544|396913|	NTF4|ABL1|C-JUN, Jun|	http://www.genome.jp/kegg-bin/show_pathway?ssc04722
Porphyrin and chlorophyll metabolism	KEGG PATHWAY	ssc00860	1	25	0.572658	1	ENSSSCG00000007942	ssc:396622|	|	396622|	HO2|	http://www.genome.jp/kegg-bin/show_pathway?ssc00860
Tight junction	KEGG PATHWAY	ssc04530	3	90	0.582832	1	ENSSSCG00000027341|ENSSSCG00000003691|ENSSSCG00000001688	ssc:396903|ssc:414399|ssc:100157933|	| | |	396903|414399|100157933|	|MRLC2|TJAP1|	http://www.genome.jp/kegg-bin/show_pathway?ssc04530
Prion diseases	KEGG PATHWAY	ssc05020	1	26	0.586961	1	ENSSSCG00000003524	ssc:445461|	|	445461|	C1QA|	http://www.genome.jp/kegg-bin/show_pathway?ssc05020
Asthma	KEGG PATHWAY	ssc05310	1	26	0.586961	1	ENSSSCG00000001453	ssc:100135040|	|	100135040|	SLA-DRA, SLA-DR-alpha, SLA-DRA1|	http://www.genome.jp/kegg-bin/show_pathway?ssc05310
Leishmaniasis	KEGG PATHWAY	ssc05140	2	59	0.591171	1	ENSSSCG00000001453|ENSSSCG00000013735	ssc:100135040|ssc:396913|	| |	100135040|396913|	SLA-DRA, SLA-DR-alpha, SLA-DRA1|C-JUN, Jun|	http://www.genome.jp/kegg-bin/show_pathway?ssc05140
Ubiquitin mediated proteolysis	KEGG PATHWAY	ssc04120	3	92	0.597812	1	ENSSSCG00000004919|ENSSSCG00000017105|ENSSSCG00000023379	ssc:100154192|ssc:100518586|ssc:100154268|	| | |	100154192|100518586|100154268|	| |UBE2L3|	http://www.genome.jp/kegg-bin/show_pathway?ssc04120
Basal transcription factors	KEGG PATHWAY	ssc03022	1	27	0.600786	1	ENSSSCG00000001533	ssc:100151814|	|	100151814|	TAF11|	http://www.genome.jp/kegg-bin/show_pathway?ssc03022
Tyrosine metabolism	KEGG PATHWAY	ssc00350	1	27	0.600786	1	ENSSSCG00000010067	ssc:397412|	|	397412|	MIF|	http://www.genome.jp/kegg-bin/show_pathway?ssc00350
Bladder cancer	KEGG PATHWAY	ssc05219	1	27	0.600786	1	ENSSSCG00000009134	ssc:397083|	|	397083|	EGF|	http://www.genome.jp/kegg-bin/show_pathway?ssc05219
Notch signaling pathway	KEGG PATHWAY	ssc04330	1	28	0.614149	1	ENSSSCG00000027516	ssc:100511415|	|	100511415|	CIR1|	http://www.genome.jp/kegg-bin/show_pathway?ssc04330
ECM-receptor interaction	KEGG PATHWAY	ssc04512	2	62	0.618293	1	ENSSSCG00000004789|ENSSSCG00000015444	ssc:492313|ssc:396707|	| |	492313|396707|	THBS1|LAMB1|	http://www.genome.jp/kegg-bin/show_pathway?ssc04512
Toxoplasmosis	KEGG PATHWAY	ssc05145	3	96	0.626703	1	ENSSSCG00000001453|ENSSSCG00000015444|ENSSSCG00000002274	ssc:100135040|ssc:396707|ssc:396648|	| | |	100135040|396707|396648|	SLA-DRA, SLA-DR-alpha, SLA-DRA1|LAMB1|HSP70.2, HSPA1A, HSPA1B|	http://www.genome.jp/kegg-bin/show_pathway?ssc05145
Wnt signaling pathway	KEGG PATHWAY	ssc04310	3	96	0.626703	1	ENSSSCG00000002127|ENSSSCG00000024866|ENSSSCG00000013735	ssc:100156733|ssc:100517932|ssc:396913|	| | |	100156733|100517932|396913|	CHD8|APC, APC1|C-JUN, Jun|	http://www.genome.jp/kegg-bin/show_pathway?ssc04310
Aldosterone-regulated sodium reabsorption	KEGG PATHWAY	ssc04960	1	29	0.627065	1	ENSSSCG00000004919	ssc:100154192|	|	100154192|	|	http://www.genome.jp/kegg-bin/show_pathway?ssc04960
Cocaine addiction	KEGG PATHWAY	ssc05030	1	30	0.639551	1	ENSSSCG00000013735	ssc:396913|	|	396913|	C-JUN, Jun|	http://www.genome.jp/kegg-bin/show_pathway?ssc05030
Apoptosis	KEGG PATHWAY	ssc04210	2	66	0.652275	1	ENSSSCG00000029328|ENSSSCG00000020906	ssc:595129|ssc:406191|	| |	595129|406191|	FADD|TNFSF10, TRAIL|	http://www.genome.jp/kegg-bin/show_pathway?ssc04210
Insulin signaling pathway	KEGG PATHWAY	ssc04910	3	102	0.667303	1	ENSSSCG00000003018|ENSSSCG00000000185|ENSSSCG00000009370	ssc:397583|ssc:414426|ssc:397077|	| | |	397583|414426|397077|	LIPE, HSL|PRKAG1|FOXO1, FOXO1A|	http://www.genome.jp/kegg-bin/show_pathway?ssc04910
Amyotrophic lateral sclerosis (ALS)	KEGG PATHWAY	ssc05014	1	34	0.685458	1	ENSSSCG00000003089	ssc:100524985|	|	100524985|	|	http://www.genome.jp/kegg-bin/show_pathway?ssc05014
Mineral absorption	KEGG PATHWAY	ssc04978	1	35	0.695992	1	ENSSSCG00000007942	ssc:396622|	|	396622|	HO2|	http://www.genome.jp/kegg-bin/show_pathway?ssc04978
Vasopressin-regulated water reabsorption	KEGG PATHWAY	ssc04962	1	35	0.695992	1	ENSSSCG00000024342	ssc:100126277|	|	100126277|	AQP4|	http://www.genome.jp/kegg-bin/show_pathway?ssc04962
NOD-like receptor signaling pathway	KEGG PATHWAY	ssc04621	1	35	0.695992	1	ENSSSCG00000001701	ssc:396742|	|	396742|	HSPCB|	http://www.genome.jp/kegg-bin/show_pathway?ssc04621
Non-small cell lung cancer	KEGG PATHWAY	ssc05223	1	36	0.706175	1	ENSSSCG00000009134	ssc:397083|	|	397083|	EGF|	http://www.genome.jp/kegg-bin/show_pathway?ssc05223
Measles	KEGG PATHWAY	ssc05162	3	110	0.716288	1	ENSSSCG00000020906|ENSSSCG00000017406|ENSSSCG00000002274	ssc:406191|ssc:397340|ssc:396648|	| | |	406191|397340|396648|	TNFSF10, TRAIL|STAT5B|HSP70.2, HSPA1A, HSPA1B|	http://www.genome.jp/kegg-bin/show_pathway?ssc05162
Amoebiasis	KEGG PATHWAY	ssc05146	2	75	0.719888	1	ENSSSCG00000010313|ENSSSCG00000015444	ssc:396974|ssc:396707|	| |	396974|396707|	VCL|LAMB1|	http://www.genome.jp/kegg-bin/show_pathway?ssc05146
Basal cell carcinoma	KEGG PATHWAY	ssc05217	1	38	0.72553	1	ENSSSCG00000024866	ssc:100517932|	|	100517932|	APC, APC1|	http://www.genome.jp/kegg-bin/show_pathway?ssc05217
Toll-like receptor signaling pathway	KEGG PATHWAY	ssc04620	2	76	0.726674	1	ENSSSCG00000029328|ENSSSCG00000013735	ssc:595129|ssc:396913|	| |	595129|396913|	FADD|C-JUN, Jun|	http://www.genome.jp/kegg-bin/show_pathway?ssc04620
Cell adhesion molecules (CAMs)	KEGG PATHWAY	ssc04514	3	113	0.733158	1	ENSSSCG00000001453|ENSSSCG00000017277|ENSSSCG00000001227|ENSSSCG00000001231	ssc:100135040|ssc:396941|ssc:100135029|ssc:100135029|	| | | |	100135040|396941|100135029|100135029|	SLA-DRA, SLA-DR-alpha, SLA-DRA1|PECAM1, CD31, PECAM-1|SLA-5, SLA-1, SLA-5b|SLA-5, SLA-1, SLA-5b|	http://www.genome.jp/kegg-bin/show_pathway?ssc04514
Acute myeloid leukemia	KEGG PATHWAY	ssc05221	1	39	0.734725	1	ENSSSCG00000017406	ssc:397340|	|	397340|	STAT5B|	http://www.genome.jp/kegg-bin/show_pathway?ssc05221
Amino sugar and nucleotide sugar metabolism	KEGG PATHWAY	ssc00520	1	39	0.734725	1	ENSSSCG00000008368	ssc:397040|	|	397040|	UGP2|	http://www.genome.jp/kegg-bin/show_pathway?ssc00520
Glioma	KEGG PATHWAY	ssc05214	1	40	0.743613	1	ENSSSCG00000009134	ssc:397083|	|	397083|	EGF|	http://www.genome.jp/kegg-bin/show_pathway?ssc05214
Rheumatoid arthritis	KEGG PATHWAY	ssc05323	2	81	0.758548	1	ENSSSCG00000001453|ENSSSCG00000013735	ssc:100135040|ssc:396913|	| |	100135040|396913|	SLA-DRA, SLA-DR-alpha, SLA-DRA1|C-JUN, Jun|	http://www.genome.jp/kegg-bin/show_pathway?ssc05323
N-Glycan biosynthesis	KEGG PATHWAY	ssc00510	1	42	0.760507	1	ENSSSCG00000006360	ssc:100154856|	|	100154856|	|	http://www.genome.jp/kegg-bin/show_pathway?ssc00510
Retinol metabolism	KEGG PATHWAY	ssc00830	1	42	0.760507	1	ENSSSCG00000002013	ssc:397082|	|	397082|	DHRS4, PSCD|	http://www.genome.jp/kegg-bin/show_pathway?ssc00830
Transcriptional misregulation in cancer	KEGG PATHWAY	ssc05202	3	119	0.764519	1	ENSSSCG00000005621|ENSSSCG00000005166|ENSSSCG00000009370	ssc:100307051|ssc:100524063|ssc:397077|	| | |	100307051|100524063|397077|	CDK9|MLLT3|FOXO1, FOXO1A|	http://www.genome.jp/kegg-bin/show_pathway?ssc05202
Renal cell carcinoma	KEGG PATHWAY	ssc05211	1	44	0.776291	1	ENSSSCG00000013735	ssc:396913|	|	396913|	C-JUN, Jun|	http://www.genome.jp/kegg-bin/show_pathway?ssc05211
Bacterial invasion of epithelial cells	KEGG PATHWAY	ssc05100	1	45	0.783789	1	ENSSSCG00000010313	ssc:396974|	|	396974|	VCL|	http://www.genome.jp/kegg-bin/show_pathway?ssc05100
Drug metabolism - cytochrome P450	KEGG PATHWAY	ssc00982	1	45	0.783789	1	ENSSSCG00000016466	ssc:100521480|	|	100521480|	|	http://www.genome.jp/kegg-bin/show_pathway?ssc00982
Legionellosis	KEGG PATHWAY	ssc05134	1	46	0.791036	1	ENSSSCG00000002274	ssc:396648|	|	396648|	HSP70.2, HSPA1A, HSPA1B|	http://www.genome.jp/kegg-bin/show_pathway?ssc05134
Intestinal immune network for IgA production	KEGG PATHWAY	ssc04672	1	46	0.791036	1	ENSSSCG00000001453	ssc:100135040|	|	100135040|	SLA-DRA, SLA-DR-alpha, SLA-DRA1|	http://www.genome.jp/kegg-bin/show_pathway?ssc04672
Aminoacyl-tRNA biosynthesis	KEGG PATHWAY	ssc00970	1	46	0.791036	1	ENSSSCG00000002704|ENSSSCG00000002705	ssc:100521452|ssc:100521452|	| |	100521452|100521452|	KARS|KARS|	http://www.genome.jp/kegg-bin/show_pathway?ssc00970
Bile secretion	KEGG PATHWAY	ssc04976	1	46	0.791036	1	ENSSSCG00000024342	ssc:100126277|	|	100126277|	AQP4|	http://www.genome.jp/kegg-bin/show_pathway?ssc04976
Metabolism of xenobiotics by cytochrome P450	KEGG PATHWAY	ssc00980	1	47	0.798041	1	ENSSSCG00000016466	ssc:100521480|	|	100521480|	|	http://www.genome.jp/kegg-bin/show_pathway?ssc00980
Adherens junction	KEGG PATHWAY	ssc04520	1	48	0.804811	1	ENSSSCG00000010313	ssc:396974|	|	396974|	VCL|	http://www.genome.jp/kegg-bin/show_pathway?ssc04520
Cytokine-cytokine receptor interaction	KEGG PATHWAY	ssc04060	4	167	0.813601	1	ENSSSCG00000009134|ENSSSCG00000010974|ENSSSCG00000027130|ENSSSCG00000020906	ssc:397083|ssc:100524518|ssc:100217390|ssc:406191|	| | | |	397083|100524518|100217390|406191|	EGF| |TNFRSF12A, Fn14, TWEAKR|TNFSF10, TRAIL|	http://www.genome.jp/kegg-bin/show_pathway?ssc04060
Pancreatic cancer	KEGG PATHWAY	ssc05212	1	51	0.823794	1	ENSSSCG00000009134	ssc:397083|	|	397083|	EGF|	http://www.genome.jp/kegg-bin/show_pathway?ssc05212
Melanoma	KEGG PATHWAY	ssc05218	1	51	0.823794	1	ENSSSCG00000009134	ssc:397083|	|	397083|	EGF|	http://www.genome.jp/kegg-bin/show_pathway?ssc05218
p53 signaling pathway	KEGG PATHWAY	ssc04115	1	52	0.829703	1	ENSSSCG00000025698	ssc:396945|	|	396945|	SERPINE1, PLANH1|	http://www.genome.jp/kegg-bin/show_pathway?ssc04115
RIG-I-like receptor signaling pathway	KEGG PATHWAY	ssc04622	1	54	0.840935	1	ENSSSCG00000029328	ssc:595129|	|	595129|	FADD|	http://www.genome.jp/kegg-bin/show_pathway?ssc04622
TGF-beta signaling pathway	KEGG PATHWAY	ssc04350	1	56	0.851427	1	ENSSSCG00000004789	ssc:492313|	|	492313|	THBS1|	http://www.genome.jp/kegg-bin/show_pathway?ssc04350
mRNA surveillance pathway	KEGG PATHWAY	ssc03015	1	56	0.851427	1	ENSSSCG00000013179	ssc:100520541|	|	100520541|	|	http://www.genome.jp/kegg-bin/show_pathway?ssc03015
Retrograde endocannabinoid signaling	KEGG PATHWAY	ssc04723	1	57	0.856412	1	ENSSSCG00000003901	ssc:396949|	|	396949|	FAAH|	http://www.genome.jp/kegg-bin/show_pathway?ssc04723
GnRH signaling pathway	KEGG PATHWAY	ssc04912	1	58	0.861229	1	ENSSSCG00000013735	ssc:396913|	|	396913|	C-JUN, Jun|	http://www.genome.jp/kegg-bin/show_pathway?ssc04912
Progesterone-mediated oocyte maturation	KEGG PATHWAY	ssc04914	1	62	0.878939	1	ENSSSCG00000001701	ssc:396742|	|	396742|	HSPCB|	http://www.genome.jp/kegg-bin/show_pathway?ssc04914
Pancreatic secretion	KEGG PATHWAY	ssc04972	1	63	0.883002	1	ENSSSCG00000027344	ssc:396875|	|	396875|	ATP2A2, ATP2, SERCA2|	http://www.genome.jp/kegg-bin/show_pathway?ssc04972
Small cell lung cancer	KEGG PATHWAY	ssc05222	1	65	0.890725	1	ENSSSCG00000015444	ssc:396707|	|	396707|	LAMB1|	http://www.genome.jp/kegg-bin/show_pathway?ssc05222
Melanogenesis	KEGG PATHWAY	ssc04916	1	65	0.890725	1	ENSSSCG00000021155	ssc:396863|	|	396863|	POMC|	http://www.genome.jp/kegg-bin/show_pathway?ssc04916
Glutamatergic synapse	KEGG PATHWAY	ssc04724	1	67	0.897939	1	ENSSSCG00000014113	ssc:100511070|	|	100511070|	HOMER1|	http://www.genome.jp/kegg-bin/show_pathway?ssc04724
Hematopoietic cell lineage	KEGG PATHWAY	ssc04640	1	68	0.901366	1	ENSSSCG00000024791	ssc:397347|	|	397347|	CD59|	http://www.genome.jp/kegg-bin/show_pathway?ssc04640
Jak-STAT signaling pathway	KEGG PATHWAY	ssc04630	2	116	0.903701	1	ENSSSCG00000010974|ENSSSCG00000017406	ssc:100524518|ssc:397340|	| |	100524518|397340|	|STAT5B|	http://www.genome.jp/kegg-bin/show_pathway?ssc04630
Serotonergic synapse	KEGG PATHWAY	ssc04726	1	75	0.922345	1	ENSSSCG00000012022	ssc:397663|	|	397663|	APP|	http://www.genome.jp/kegg-bin/show_pathway?ssc04726
Natural killer cell mediated cytotoxicity	KEGG PATHWAY	ssc04650	1	76	0.924954	1	ENSSSCG00000020906	ssc:406191|	|	406191|	TNFSF10, TRAIL|	http://www.genome.jp/kegg-bin/show_pathway?ssc04650
Axon guidance	KEGG PATHWAY	ssc04360	1	80	0.934544	1	ENSSSCG00000005706	ssc:100524544|	|	100524544|	ABL1|	http://www.genome.jp/kegg-bin/show_pathway?ssc04360
Tuberculosis	KEGG PATHWAY	ssc05152	2	133	0.939872	1	ENSSSCG00000001453|ENSSSCG00000029328	ssc:100135040|ssc:595129|	| |	100135040|595129|	SLA-DRA, SLA-DR-alpha, SLA-DRA1|FADD|	http://www.genome.jp/kegg-bin/show_pathway?ssc05152
T cell receptor signaling pathway	KEGG PATHWAY	ssc04660	1	83	0.940925	1	ENSSSCG00000013735	ssc:396913|	|	396913|	C-JUN, Jun|	http://www.genome.jp/kegg-bin/show_pathway?ssc04660
Cell cycle	KEGG PATHWAY	ssc04110	1	85	0.94483	1	ENSSSCG00000005706	ssc:100524544|	|	100524544|	ABL1|	http://www.genome.jp/kegg-bin/show_pathway?ssc04110
Osteoclast differentiation	KEGG PATHWAY	ssc04380	1	90	0.953503	1	ENSSSCG00000013735	ssc:396913|	|	396913|	C-JUN, Jun|	http://www.genome.jp/kegg-bin/show_pathway?ssc04380
Hepatitis C	KEGG PATHWAY	ssc05160	1	104	0.971207	1	ENSSSCG00000009134	ssc:397083|	|	397083|	EGF|	http://www.genome.jp/kegg-bin/show_pathway?ssc05160
Purine metabolism	KEGG PATHWAY	ssc00230	1	111	0.977346	1	ENSSSCG00000016929	ssc:100037967|	|	100037967|	|	http://www.genome.jp/kegg-bin/show_pathway?ssc00230
Chemokine signaling pathway	KEGG PATHWAY	ssc04062	1	125	0.985983	1	ENSSSCG00000017406	ssc:397340|	|	397340|	STAT5B|	http://www.genome.jp/kegg-bin/show_pathway?ssc04062
Calcium signaling pathway	KEGG PATHWAY	ssc04020	1	128	0.987354	1	ENSSSCG00000027344	ssc:396875|	|	396875|	ATP2A2, ATP2, SERCA2|	http://www.genome.jp/kegg-bin/show_pathway?ssc04020
Neuroactive ligand-receptor interaction	KEGG PATHWAY	ssc04080	2	189	0.988163	1	ENSSSCG00000029849|ENSSSCG00000024072	ssc:100154607|ssc:100533477|	| |	100154607|100533477|	|P2RY11|	http://www.genome.jp/kegg-bin/show_pathway?ssc04080
