# Supplementary material for: Comparison of differentially expressed genes in longissimus dorsi muscle of Diannan small ears, Wujin and landrace pigs using RNA-seq
Source: Front Vet Sci. 2024 Jan 5;10:1296208. doi: 10.3389/fvets.2023.1296208 (PMC10796741; doi:10.3389/fvets.2023.1296208)
Supplement: Supplementary file 11 [file Table_8.XLSX]

## Sheet: add.L6_L7_L12vsD54_D67_D74.inde
Table S8. KEGG functional annotation of differentially expressed genes between LP and DSE.xlsx
#Term	Database	Id	Sample number	Background number	P-Value	Corrected P-Value	Genes	KO	Entrez_ID	Ensembl_ID	KO_name	Hyperlink
PPAR signaling pathway	KEGG PATHWAY	ssc03320	9	59	5.06396e-05	0.0118497	ENSSSCG00000015405|ENSSSCG00000003776|ENSSSCG00000010554|ENSSSCG00000016156|ENSSSCG00000010494|ENSSSCG00000012583|ENSSSCG00000015070|ENSSSCG00000006328|ENSSSCG00000015069	ssc:733702|ssc:397104|ssc:396670|ssc:396931|ssc:100153151|ssc:448980|ssc:397691|ssc:445465|ssc:406187|	| | | | | | | | |	733702|397104|396670|396931|100153151|448980|397691|445465|406187|	CD36|ACADM|SCD|ACADL|SORBS1|ACSL4|APOA1|RXRG, NR2B3, RXRgamma|APOC3|	http://www.genome.jp/kegg-bin/show_pathway?ssc03320
Glycolysis / Gluconeogenesis	KEGG PATHWAY	ssc00010	6	41	0.001161	0.135837	ENSSSCG00000002873|ENSSSCG00000013366|ENSSSCG00000017904|ENSSSCG00000012440|ENSSSCG00000024752|ENSSSCG00000001930	ssc:397602|ssc:407245|ssc:692156|ssc:407608|ssc:733685|ssc:100158154|	| | | | | |	397602|407245|692156|407608|733685|100158154|	GPI, PGI|LDHA, LDH-A, LDH-M|ENO3|PGK1|ALDH2|PKM2, PK-S|	http://www.genome.jp/kegg-bin/show_pathway?ssc00010
ErbB signaling pathway	KEGG PATHWAY	ssc04012	6	60	0.00811392	0.632886	ENSSSCG00000013735|ENSSSCG00000014362|ENSSSCG00000008144|ENSSSCG00000017406|ENSSSCG00000022111|ENSSSCG00000009048	ssc:396913|ssc:397564|ssc:100192439|ssc:397340|ssc:100152215|ssc:100511026|	| | | | | |	396913|397564|100192439|397340|100152215|100511026|	C-JUN, Jun|HBEGF, DTR|NCK2|STAT5B|CDKN1A|GAB1|	http://www.genome.jp/kegg-bin/show_pathway?ssc04012
Glycosphingolipid biosynthesis - ganglio series	KEGG PATHWAY	ssc00604	2	7	0.016376	0.957995	ENSSSCG00000005628|ENSSSCG00000005943	ssc:396676|ssc:445537|	| |	396676|445537|	ST6GALNAC2, SIAT7B, ST6GALNAC-IV|ST3GAL1, SIAT4A|	http://www.genome.jp/kegg-bin/show_pathway?ssc00604
Fatty acid metabolism	KEGG PATHWAY	ssc00071	4	36	0.0205493	0.961708	ENSSSCG00000016156|ENSSSCG00000024752|ENSSSCG00000003776|ENSSSCG00000012583	ssc:396931|ssc:733685|ssc:397104|ssc:448980|	| | | |	396931|733685|397104|448980|	ACADL|ALDH2|ACADM|ACSL4|	http://www.genome.jp/kegg-bin/show_pathway?ssc00071
Circadian rhythm - mammal	KEGG PATHWAY	ssc04710	2	9	0.0270047	1	ENSSSCG00000004576|ENSSSCG00000011534|ENSSSCG00000028552	ssc:100156637|ssc:100514873|ssc:100514873|	| | |	100156637|100514873|100514873|	RORA|BHLHE40|BHLHE40|	http://www.genome.jp/kegg-bin/show_pathway?ssc04710
Antigen processing and presentation	KEGG PATHWAY	ssc04612	5	61	0.0330691	1	ENSSSCG00000001229|ENSSSCG00000001453|ENSSSCG00000004687|ENSSSCG00000001456|ENSSSCG00000002274	ssc:100135029|ssc:100135040|ssc:397033|ssc:100153387|ssc:396648|	| | | | |	100135029|100135040|397033|100153387|396648|	SLA-5, SLA-1, SLA-5b|SLA-DRA, SLA-DR-alpha, SLA-DRA1|B2M|SLA-DQA1, SLA-DQA|HSP70.2, HSPA1A, HSPA1B|	http://www.genome.jp/kegg-bin/show_pathway?ssc04612
Propanoate metabolism	KEGG PATHWAY	ssc00640	3	25	0.0358095	1	ENSSSCG00000013366|ENSSSCG00000024752|ENSSSCG00000003776	ssc:407245|ssc:733685|ssc:397104|	| | |	407245|733685|397104|	LDHA, LDH-A, LDH-M|ALDH2|ACADM|	http://www.genome.jp/kegg-bin/show_pathway?ssc00640
Pyruvate metabolism	KEGG PATHWAY	ssc00620	3	28	0.0478451	1	ENSSSCG00000013366|ENSSSCG00000024752|ENSSSCG00000001930	ssc:407245|ssc:733685|ssc:100158154|	| | |	407245|733685|100158154|	LDHA, LDH-A, LDH-M|ALDH2|PKM2, PK-S|	http://www.genome.jp/kegg-bin/show_pathway?ssc00620
Biosynthesis of unsaturated fatty acids	KEGG PATHWAY	ssc01040	2	13	0.0541735	1	ENSSSCG00000010554|ENSSSCG00000013780	ssc:396670|ssc:100515709|	| |	396670|100515709|	SCD| |	http://www.genome.jp/kegg-bin/show_pathway?ssc01040
HTLV-I infection	KEGG PATHWAY	ssc05166	10	194	0.0603182	1	ENSSSCG00000013735|ENSSSCG00000001453|ENSSSCG00000001229|ENSSSCG00000017406|ENSSSCG00000003876|ENSSSCG00000022111|ENSSSCG00000002383|ENSSSCG00000001456|ENSSSCG00000023609|ENSSSCG00000011106	ssc:396913|ssc:100135040|ssc:100135029|ssc:397340|ssc:100515210|ssc:100152215|ssc:100144486|ssc:100153387|ssc:100157451|ssc:100512363|	| | | | | | | | | |	396913|100135040|100135029|397340|100515210|100152215|100144486|100153387|100157451|100512363|	C-JUN, Jun|SLA-DRA, SLA-DR-alpha, SLA-DRA1|SLA-5, SLA-1, SLA-5b|STAT5B| |CDKN1A|FOS, c-fos|SLA-DQA1, SLA-DQA| | |	http://www.genome.jp/kegg-bin/show_pathway?ssc05166
RNA transport	KEGG PATHWAY	ssc03013	6	101	0.0767227	1	ENSSSCG00000022828|ENSSSCG00000012178|ENSSSCG00000016034|ENSSSCG00000008979|ENSSSCG00000004489|ENSSSCG00000029864	ssc:100526149|ssc:100525970|ssc:100152001|ssc:100512118|ssc:574059|ssc:100522912|	| | | | | |	100526149|100525970|100152001|100512118|574059|100522912|	PNN| |COL3A1|NUP54|EEF1A1, EF1A1|EIF1AX|	http://www.genome.jp/kegg-bin/show_pathway?ssc03013
Viral myocarditis	KEGG PATHWAY	ssc05416	4	55	0.0775738	1	ENSSSCG00000001229|ENSSSCG00000001453|ENSSSCG00000001456|ENSSSCG00000018005	ssc:100135029|ssc:100135040|ssc:100153387|ssc:100125538|	| | | |	100135029|100135040|100153387|100125538|	SLA-5, SLA-1, SLA-5b|SLA-DRA, SLA-DR-alpha, SLA-DRA1|SLA-DQA1, SLA-DQA|MYH1|	http://www.genome.jp/kegg-bin/show_pathway?ssc05416
Nicotinate and nicotinamide metabolism	KEGG PATHWAY	ssc00760	2	16	0.0787079	1	ENSSSCG00000018052|ENSSSCG00000016877	ssc:100513046|ssc:100526144|	| |	100513046|100526144|	| |	http://www.genome.jp/kegg-bin/show_pathway?ssc00760
Graft-versus-host disease	KEGG PATHWAY	ssc05332	3	35	0.0824408	1	ENSSSCG00000001229|ENSSSCG00000001453|ENSSSCG00000001456	ssc:100135029|ssc:100135040|ssc:100153387|	| | |	100135029|100135040|100153387|	SLA-5, SLA-1, SLA-5b|SLA-DRA, SLA-DR-alpha, SLA-DRA1|SLA-DQA1, SLA-DQA|	http://www.genome.jp/kegg-bin/show_pathway?ssc05332
Rheumatoid arthritis	KEGG PATHWAY	ssc05323	5	81	0.0895445	1	ENSSSCG00000010414|ENSSSCG00000001453|ENSSSCG00000001456|ENSSSCG00000002383|ENSSSCG00000013735	ssc:494460|ssc:100135040|ssc:100153387|ssc:100144486|ssc:396913|	| | | | |	494460|100135040|100153387|100144486|396913|	CXCL12, SDF-1|SLA-DRA, SLA-DR-alpha, SLA-DRA1|SLA-DQA1, SLA-DQA|FOS, c-fos|C-JUN, Jun|	http://www.genome.jp/kegg-bin/show_pathway?ssc05323
Leishmaniasis	KEGG PATHWAY	ssc05140	4	59	0.0947279	1	ENSSSCG00000001453|ENSSSCG00000001456|ENSSSCG00000002383|ENSSSCG00000013735	ssc:100135040|ssc:100153387|ssc:100144486|ssc:396913|	| | | |	100135040|100153387|100144486|396913|	SLA-DRA, SLA-DR-alpha, SLA-DRA1|SLA-DQA1, SLA-DQA|FOS, c-fos|C-JUN, Jun|	http://www.genome.jp/kegg-bin/show_pathway?ssc05140
Cardiac muscle contraction	KEGG PATHWAY	ssc04260	4	59	0.0947279	1	ENSSSCG00000005316|ENSSSCG00000017510|ENSSSCG00000004570|ENSSSCG00000018075	ssc:397608|ssc:100514316|ssc:100037999|ssc:808503|	| | | |	397608|100514316|100037999|808503|	TPM4|CACNB1|TPM1|COX1|	http://www.genome.jp/kegg-bin/show_pathway?ssc04260
Focal adhesion	KEGG PATHWAY	ssc04510	7	133	0.0968593	1	ENSSSCG00000024960|ENSSSCG00000013735|ENSSSCG00000004012|ENSSSCG00000003691|ENSSSCG00000024230|ENSSSCG00000008540|ENSSSCG00000009545	ssc:100515267|ssc:396913|ssc:100153940|ssc:414399|ssc:100157760|ssc:397378|ssc:100153454|	| | | | | | |	100515267|396913|100153940|414399|100157760|397378|100153454|	|C-JUN, Jun| |MRLC2|MYL9, LC20, MYRL2|PPP1CB|COL4A2|	http://www.genome.jp/kegg-bin/show_pathway?ssc04510
Arginine and proline metabolism	KEGG PATHWAY	ssc00330	3	38	0.099786	1	ENSSSCG00000014128|ENSSSCG00000002294|ENSSSCG00000024752	ssc:733602|ssc:100155893|ssc:733685|	| | |	733602|100155893|733685|	CKMT2|ARG2|ALDH2|	http://www.genome.jp/kegg-bin/show_pathway?ssc00330
Parkinson's disease	KEGG PATHWAY	ssc05012	6	110	0.104894	1	ENSSSCG00000018075|ENSSSCG00000018087|ENSSSCG00000018086|ENSSSCG00000003505|ENSSSCG00000018091|ENSSSCG00000003385	ssc:808503|ssc:808510|ssc:808509|ssc:100515613|ssc:808511|ssc:780404|	| | | | | |	808503|808510|808509|100515613|808511|780404|	COX1|ND4|ND4L|PINK1|ND5|PARK7|	http://www.genome.jp/kegg-bin/show_pathway?ssc05012
Allograft rejection	KEGG PATHWAY	ssc05330	3	39	0.105868	1	ENSSSCG00000001229|ENSSSCG00000001453|ENSSSCG00000001456	ssc:100135029|ssc:100135040|ssc:100153387|	| | |	100135029|100135040|100153387|	SLA-5, SLA-1, SLA-5b|SLA-DRA, SLA-DR-alpha, SLA-DRA1|SLA-DQA1, SLA-DQA|	http://www.genome.jp/kegg-bin/show_pathway?ssc05330
Herpes simplex infection	KEGG PATHWAY	ssc05168	7	138	0.111932	1	ENSSSCG00000013735|ENSSSCG00000001229|ENSSSCG00000001456|ENSSSCG00000001453|ENSSSCG00000003090|ENSSSCG00000002383|ENSSSCG00000008540	ssc:396913|ssc:100135029|ssc:100153387|ssc:100135040|ssc:100038012|ssc:100144486|ssc:397378|	| | | | | | |	396913|100135029|100153387|100135040|100038012|100144486|397378|	C-JUN, Jun|SLA-5, SLA-1, SLA-5b|SLA-DQA1, SLA-DQA|SLA-DRA, SLA-DR-alpha, SLA-DRA1|PRR2|FOS, c-fos|PPP1CB|	http://www.genome.jp/kegg-bin/show_pathway?ssc05168
Dilated cardiomyopathy	KEGG PATHWAY	ssc05414	4	64	0.118436	1	ENSSSCG00000004248|ENSSSCG00000005316|ENSSSCG00000017510|ENSSSCG00000004570	ssc:397421|ssc:397608|ssc:100514316|ssc:100037999|	| | | |	397421|397608|100514316|100037999|	PLN|TPM4|CACNB1|TPM1|	http://www.genome.jp/kegg-bin/show_pathway?ssc05414
beta-Alanine metabolism	KEGG PATHWAY	ssc00410	2	21	0.125335	1	ENSSSCG00000024752|ENSSSCG00000003776	ssc:733685|ssc:397104|	| |	733685|397104|	ALDH2|ACADM|	http://www.genome.jp/kegg-bin/show_pathway?ssc00410
Type I diabetes mellitus	KEGG PATHWAY	ssc04940	3	43	0.131557	1	ENSSSCG00000001229|ENSSSCG00000001453|ENSSSCG00000001456	ssc:100135029|ssc:100135040|ssc:100153387|	| | |	100135029|100135040|100153387|	SLA-5, SLA-1, SLA-5b|SLA-DRA, SLA-DR-alpha, SLA-DRA1|SLA-DQA1, SLA-DQA|	http://www.genome.jp/kegg-bin/show_pathway?ssc04940
Transcriptional misregulation in cancer	KEGG PATHWAY	ssc05202	6	119	0.137705	1	ENSSSCG00000005166|ENSSSCG00000003876|ENSSSCG00000011081|ENSSSCG00000022111|ENSSSCG00000013743|ENSSSCG00000006328	ssc:100524063|ssc:100515210|ssc:100520800|ssc:100152215|ssc:100523949|ssc:445465|	| | | | | |	100524063|100515210|100520800|100152215|100523949|445465|	MLLT3| | |CDKN1A| |RXRG, NR2B3, RXRgamma|	http://www.genome.jp/kegg-bin/show_pathway?ssc05202
Intestinal immune network for IgA production	KEGG PATHWAY	ssc04672	3	46	0.152101	1	ENSSSCG00000001453|ENSSSCG00000001456|ENSSSCG00000010414	ssc:100135040|ssc:100153387|ssc:494460|	| | |	100135040|100153387|494460|	SLA-DRA, SLA-DR-alpha, SLA-DRA1|SLA-DQA1, SLA-DQA|CXCL12, SDF-1|	http://www.genome.jp/kegg-bin/show_pathway?ssc04672
SNARE interactions in vesicular transport	KEGG PATHWAY	ssc04130	2	25	0.166184	1	ENSSSCG00000004727|ENSSSCG00000007516	ssc:100512755|ssc:100144526|	| |	100512755|100144526|	SNAP23|STX16|	http://www.genome.jp/kegg-bin/show_pathway?ssc04130
Arachidonic acid metabolism	KEGG PATHWAY	ssc00590	3	48	0.166325	1	ENSSSCG00000026554|ENSSSCG00000020706|ENSSSCG00000028753	ssc:100134955|ssc:397143|ssc:100113470|	| | |	100134955|397143|100113470|	|CBR1|CYP4F2|	http://www.genome.jp/kegg-bin/show_pathway?ssc00590
Autoimmune thyroid disease	KEGG PATHWAY	ssc05320	3	49	0.173578	1	ENSSSCG00000001229|ENSSSCG00000001453|ENSSSCG00000001456	ssc:100135029|ssc:100135040|ssc:100153387|	| | |	100135029|100135040|100153387|	SLA-5, SLA-1, SLA-5b|SLA-DRA, SLA-DR-alpha, SLA-DRA1|SLA-DQA1, SLA-DQA|	http://www.genome.jp/kegg-bin/show_pathway?ssc05320
Malaria	KEGG PATHWAY	ssc05144	3	49	0.173578	1	ENSSSCG00000015405|ENSSSCG00000004012|ENSSSCG00000015724	ssc:733702|ssc:100153940|ssc:100518277|	| | |	733702|100153940|100518277|	CD36| | |	http://www.genome.jp/kegg-bin/show_pathway?ssc05144
Asthma	KEGG PATHWAY	ssc05310	2	26	0.176731	1	ENSSSCG00000001453|ENSSSCG00000001456	ssc:100135040|ssc:100153387|	| |	100135040|100153387|	SLA-DRA, SLA-DR-alpha, SLA-DRA1|SLA-DQA1, SLA-DQA|	http://www.genome.jp/kegg-bin/show_pathway?ssc05310
Starch and sucrose metabolism	KEGG PATHWAY	ssc00500	2	27	0.187378	1	ENSSSCG00000004729|ENSSSCG00000002873	ssc:100513637|ssc:397602|	| |	100513637|397602|	GANC|GPI, PGI|	http://www.genome.jp/kegg-bin/show_pathway?ssc00500
Protein digestion and absorption	KEGG PATHWAY	ssc04974	3	53	0.203416	1	ENSSSCG00000002032|ENSSSCG00000009545|ENSSSCG00000022404	ssc:100522330|ssc:100153454|ssc:100144588|	| | |	100522330|100153454|100144588|	|COL4A2|SLC3A1|	http://www.genome.jp/kegg-bin/show_pathway?ssc04974
Fat digestion and absorption	KEGG PATHWAY	ssc04975	2	30	0.21978	1	ENSSSCG00000015405|ENSSSCG00000015070	ssc:733702|ssc:397691|	| |	733702|397691|	CD36|APOA1|	http://www.genome.jp/kegg-bin/show_pathway?ssc04975
Adipocytokine signaling pathway	KEGG PATHWAY	ssc04920	3	56	0.226513	1	ENSSSCG00000015405|ENSSSCG00000006328|ENSSSCG00000012583	ssc:733702|ssc:445465|ssc:448980|	| | |	733702|445465|448980|	CD36|RXRG, NR2B3, RXRgamma|ACSL4|	http://www.genome.jp/kegg-bin/show_pathway?ssc04920
Glycosaminoglycan biosynthesis - keratan sulfate	KEGG PATHWAY	ssc00533	1	9	0.235323	1	ENSSSCG00000005943	ssc:445537|	|	445537|	ST3GAL1, SIAT4A|	http://www.genome.jp/kegg-bin/show_pathway?ssc00533
Terpenoid backbone biosynthesis	KEGG PATHWAY	ssc00900	1	10	0.257791	1	ENSSSCG00000006535	ssc:100152301|	|	100152301|	PMVK|	http://www.genome.jp/kegg-bin/show_pathway?ssc00900
Regulation of actin cytoskeleton	KEGG PATHWAY	ssc04810	6	146	0.258675	1	ENSSSCG00000024960|ENSSSCG00000015013|ENSSSCG00000003691|ENSSSCG00000017791|ENSSSCG00000024230|ENSSSCG00000008540	ssc:100515267|ssc:494457|ssc:414399|ssc:100520515|ssc:100157760|ssc:397378|	| | | | | |	100515267|494457|414399|100520515|100157760|397378|	|RDX|MRLC2|SSH2|MYL9, LC20, MYRL2|PPP1CB|	http://www.genome.jp/kegg-bin/show_pathway?ssc04810
Valine, leucine and isoleucine degradation	KEGG PATHWAY	ssc00280	2	34	0.263572	1	ENSSSCG00000024752|ENSSSCG00000003776	ssc:733685|ssc:397104|	| |	733685|397104|	ALDH2|ACADM|	http://www.genome.jp/kegg-bin/show_pathway?ssc00280
Phagosome	KEGG PATHWAY	ssc04145	5	119	0.27153	1	ENSSSCG00000001229|ENSSSCG00000015405|ENSSSCG00000004012|ENSSSCG00000001456|ENSSSCG00000001453	ssc:100135029|ssc:733702|ssc:100153940|ssc:100153387|ssc:100135040|	| | | | |	100135029|733702|100153940|100153387|100135040|	SLA-5, SLA-1, SLA-5b|CD36| |SLA-DQA1, SLA-DQA|SLA-DRA, SLA-DR-alpha, SLA-DRA1|	http://www.genome.jp/kegg-bin/show_pathway?ssc04145
ECM-receptor interaction	KEGG PATHWAY	ssc04512	3	62	0.273986	1	ENSSSCG00000015405|ENSSSCG00000009545|ENSSSCG00000004012	ssc:733702|ssc:100153454|ssc:100153940|	| | |	733702|100153454|100153940|	CD36|COL4A2| |	http://www.genome.jp/kegg-bin/show_pathway?ssc04512
Glycosphingolipid biosynthesis - globo series	KEGG PATHWAY	ssc00603	1	11	0.279601	1	ENSSSCG00000005943	ssc:445537|	|	445537|	ST3GAL1, SIAT4A|	http://www.genome.jp/kegg-bin/show_pathway?ssc00603
Hypertrophic cardiomyopathy (HCM)	KEGG PATHWAY	ssc05410	3	64	0.290055	1	ENSSSCG00000005316|ENSSSCG00000017510|ENSSSCG00000004570	ssc:397608|ssc:100514316|ssc:100037999|	| | |	397608|100514316|100037999|	TPM4|CACNB1|TPM1|	http://www.genome.jp/kegg-bin/show_pathway?ssc05410
Metabolic pathways	KEGG PATHWAY	ssc01100	27	823	0.301591	1	ENSSSCG00000003776|ENSSSCG00000018087|ENSSSCG00000018086|ENSSSCG00000002294|ENSSSCG00000018075|ENSSSCG00000012440|ENSSSCG00000024752|ENSSSCG00000018091|ENSSSCG00000026554|ENSSSCG00000005628|ENSSSCG00000004729|ENSSSCG00000005943|ENSSSCG00000005627|ENSSSCG00000014128|ENSSSCG00000006535|ENSSSCG00000020706|ENSSSCG00000002873|ENSSSCG00000028753|ENSSSCG00000016156|ENSSSCG00000016877|ENSSSCG00000023044|…	ssc:397104|ssc:808510|ssc:808509|ssc:100155893|ssc:808503|ssc:407608|ssc:733685|ssc:808511|ssc:100134955|ssc:396676|ssc:100513637|ssc:445537|ssc:100521423|ssc:733602|ssc:100152301|ssc:397143|ssc:397602|ssc:100113470|ssc:396931|ssc:100526144|ssc:397561|ssc:407245|ssc:692156|ssc:448980|ssc:100513046|ssc:100158154|ssc:100518264|	| | | | | | | | | | | | | | | | | | | | | | | | | | |	397104|808510|808509|100155893|808503|407608|733685|808511|100134955|396676|100513637|445537|100521423|733602|100152301|397143|397602|100113470|396931|100526144|397561|407245|692156|448980|100513046|100158154|100518264|	ACADM|ND4|ND4L|ARG2|COX1|PGK1|ALDH2|ND5| |ST6GALNAC2, SIAT7B, ST6GALNAC-IV|GANC|ST3GAL1, SIAT4A|AK1, Myokinase|CKMT2|PMVK|CBR1|GPI, PGI|CYP4F2|ACADL| |FASN|LDHA, LDH-A, LDH-M|ENO3|ACSL4| |PKM2, PK-S| |	http://www.genome.jp/kegg-bin/show_pathway?ssc01100
Ascorbate and aldarate metabolism	KEGG PATHWAY	ssc00053	1	13	0.321321	1	ENSSSCG00000024752	ssc:733685|	|	733685|	ALDH2|	http://www.genome.jp/kegg-bin/show_pathway?ssc00053
Hematopoietic cell lineage	KEGG PATHWAY	ssc04640	3	68	0.322358	1	ENSSSCG00000015405|ENSSSCG00000027628|ENSSSCG00000024791	ssc:733702|ssc:399522|ssc:397347|	| | |	733702|399522|397347|	CD36|IL6R, IL-6Ralpha|CD59|	http://www.genome.jp/kegg-bin/show_pathway?ssc04640
Proteasome	KEGG PATHWAY	ssc03050	2	40	0.329145	1	ENSSSCG00000017731|ENSSSCG00000008412	ssc:100523278|ssc:100517820|	| |	100523278|100517820|	|PSME4|	http://www.genome.jp/kegg-bin/show_pathway?ssc03050
Pentose and glucuronate interconversions	KEGG PATHWAY	ssc00040	1	14	0.341269	1	ENSSSCG00000024752	ssc:733685|	|	733685|	ALDH2|	http://www.genome.jp/kegg-bin/show_pathway?ssc00040
Insulin signaling pathway	KEGG PATHWAY	ssc04910	4	102	0.351575	1	ENSSSCG00000003018|ENSSSCG00000008540|ENSSSCG00000010494|ENSSSCG00000023044	ssc:397583|ssc:397378|ssc:100153151|ssc:397561|	| | | |	397583|397378|100153151|397561|	LIPE, HSL|PPP1CB|SORBS1|FASN|	http://www.genome.jp/kegg-bin/show_pathway?ssc04910
Renal cell carcinoma	KEGG PATHWAY	ssc05211	2	44	0.372014	1	ENSSSCG00000013735|ENSSSCG00000009048	ssc:396913|ssc:100511026|	| |	396913|100511026|	C-JUN, Jun|GAB1|	http://www.genome.jp/kegg-bin/show_pathway?ssc05211
Oxidative phosphorylation	KEGG PATHWAY	ssc00190	4	106	0.378374	1	ENSSSCG00000018075|ENSSSCG00000018087|ENSSSCG00000018091|ENSSSCG00000018086	ssc:808503|ssc:808510|ssc:808511|ssc:808509|	| | | |	808503|808510|808511|808509|	COX1|ND4|ND5|ND4L|	http://www.genome.jp/kegg-bin/show_pathway?ssc00190
Staphylococcus aureus infection	KEGG PATHWAY	ssc05150	2	45	0.382566	1	ENSSSCG00000001453|ENSSSCG00000001456	ssc:100135040|ssc:100153387|	| |	100135040|100153387|	SLA-DRA, SLA-DR-alpha, SLA-DRA1|SLA-DQA1, SLA-DQA|	http://www.genome.jp/kegg-bin/show_pathway?ssc05150
Legionellosis	KEGG PATHWAY	ssc05134	2	46	0.393042	1	ENSSSCG00000004489|ENSSSCG00000002274	ssc:574059|ssc:396648|	| |	574059|396648|	EEF1A1, EF1A1|HSP70.2, HSPA1A, HSPA1B|	http://www.genome.jp/kegg-bin/show_pathway?ssc05134
Colorectal cancer	KEGG PATHWAY	ssc05210	2	46	0.393042	1	ENSSSCG00000002383|ENSSSCG00000013735	ssc:100144486|ssc:396913|	| |	100144486|396913|	FOS, c-fos|C-JUN, Jun|	http://www.genome.jp/kegg-bin/show_pathway?ssc05210
Vitamin digestion and absorption	KEGG PATHWAY	ssc04977	1	17	0.39767	1	ENSSSCG00000015070	ssc:397691|	|	397691|	APOA1|	http://www.genome.jp/kegg-bin/show_pathway?ssc04977
Glycosylphosphatidylinositol(GPI)-anchor biosynthesis	KEGG PATHWAY	ssc00563	1	17	0.39767	1	ENSSSCG00000009211	ssc:100518264|	|	100518264|	|	http://www.genome.jp/kegg-bin/show_pathway?ssc00563
Adherens junction	KEGG PATHWAY	ssc04520	2	48	0.413746	1	ENSSSCG00000003090|ENSSSCG00000010494	ssc:100038012|ssc:100153151|	| |	100038012|100153151|	PRR2|SORBS1|	http://www.genome.jp/kegg-bin/show_pathway?ssc04520
Pentose phosphate pathway	KEGG PATHWAY	ssc00030	1	18	0.415379	1	ENSSSCG00000002873	ssc:397602|	|	397602|	GPI, PGI|	http://www.genome.jp/kegg-bin/show_pathway?ssc00030
Fatty acid elongation	KEGG PATHWAY	ssc00062	1	18	0.415379	1	ENSSSCG00000013780	ssc:100515709|	|	100515709|	|	http://www.genome.jp/kegg-bin/show_pathway?ssc00062
Galactose metabolism	KEGG PATHWAY	ssc00052	1	18	0.415379	1	ENSSSCG00000004729	ssc:100513637|	|	100513637|	GANC|	http://www.genome.jp/kegg-bin/show_pathway?ssc00052
Cell adhesion molecules (CAMs)	KEGG PATHWAY	ssc04514	4	113	0.424941	1	ENSSSCG00000001229|ENSSSCG00000001453|ENSSSCG00000001456|ENSSSCG00000003090	ssc:100135029|ssc:100135040|ssc:100153387|ssc:100038012|	| | | |	100135029|100135040|100153387|100038012|	SLA-5, SLA-1, SLA-5b|SLA-DRA, SLA-DR-alpha, SLA-DRA1|SLA-DQA1, SLA-DQA|PRR2|	http://www.genome.jp/kegg-bin/show_pathway?ssc04514
Histidine metabolism	KEGG PATHWAY	ssc00340	1	19	0.432568	1	ENSSSCG00000024752	ssc:733685|	|	733685|	ALDH2|	http://www.genome.jp/kegg-bin/show_pathway?ssc00340
Mucin type O-Glycan biosynthesis	KEGG PATHWAY	ssc00512	1	19	0.432568	1	ENSSSCG00000005943	ssc:445537|	|	445537|	ST3GAL1, SIAT4A|	http://www.genome.jp/kegg-bin/show_pathway?ssc00512
Thyroid cancer	KEGG PATHWAY	ssc05216	1	19	0.432568	1	ENSSSCG00000006328	ssc:445465|	|	445465|	RXRG, NR2B3, RXRgamma|	http://www.genome.jp/kegg-bin/show_pathway?ssc05216
MAPK signaling pathway	KEGG PATHWAY	ssc04010	6	180	0.435001	1	ENSSSCG00000013735|ENSSSCG00000002274|ENSSSCG00000017510|ENSSSCG00000009585|ENSSSCG00000016991|ENSSSCG00000002383	ssc:396913|ssc:396648|ssc:100514316|ssc:100152997|ssc:100522469|ssc:100144486|	| | | | | |	396913|396648|100514316|100152997|100522469|100144486|	C-JUN, Jun|HSP70.2, HSPA1A, HSPA1B|CACNB1|GADD45G|DUSP1|FOS, c-fos|	http://www.genome.jp/kegg-bin/show_pathway?ssc04010
T cell receptor signaling pathway	KEGG PATHWAY	ssc04660	3	83	0.441976	1	ENSSSCG00000008144|ENSSSCG00000002383|ENSSSCG00000013735	ssc:100192439|ssc:100144486|ssc:396913|	| | |	100192439|100144486|396913|	NCK2|FOS, c-fos|C-JUN, Jun|	http://www.genome.jp/kegg-bin/show_pathway?ssc04660
Chronic myeloid leukemia	KEGG PATHWAY	ssc05220	2	51	0.444123	1	ENSSSCG00000022111|ENSSSCG00000017406	ssc:100152215|ssc:397340|	| |	100152215|397340|	CDKN1A|STAT5B|	http://www.genome.jp/kegg-bin/show_pathway?ssc05220
Melanoma	KEGG PATHWAY	ssc05218	2	51	0.444123	1	ENSSSCG00000022111|ENSSSCG00000024960	ssc:100152215|ssc:100515267|	| |	100152215|100515267|	CDKN1A| |	http://www.genome.jp/kegg-bin/show_pathway?ssc05218
Peroxisome	KEGG PATHWAY	ssc04146	2	52	0.454054	1	ENSSSCG00000006535|ENSSSCG00000012583	ssc:100152301|ssc:448980|	| |	100152301|448980|	PMVK|ACSL4|	http://www.genome.jp/kegg-bin/show_pathway?ssc04146
B cell receptor signaling pathway	KEGG PATHWAY	ssc04662	2	52	0.454054	1	ENSSSCG00000002383|ENSSSCG00000013735	ssc:100144486|ssc:396913|	| |	100144486|396913|	FOS, c-fos|C-JUN, Jun|	http://www.genome.jp/kegg-bin/show_pathway?ssc04662
p53 signaling pathway	KEGG PATHWAY	ssc04115	2	52	0.454054	1	ENSSSCG00000022111|ENSSSCG00000009585	ssc:100152215|ssc:100152997|	| |	100152215|100152997|	CDKN1A|GADD45G|	http://www.genome.jp/kegg-bin/show_pathway?ssc04115
Cell cycle	KEGG PATHWAY	ssc04110	3	85	0.4574	1	ENSSSCG00000003876|ENSSSCG00000022111|ENSSSCG00000009585	ssc:100515210|ssc:100152215|ssc:100152997|	| | |	100515210|100152215|100152997|	|CDKN1A|GADD45G|	http://www.genome.jp/kegg-bin/show_pathway?ssc04110
Leukocyte transendothelial migration	KEGG PATHWAY	ssc04670	3	88	0.480188	1	ENSSSCG00000003691|ENSSSCG00000010414|ENSSSCG00000024230	ssc:414399|ssc:494460|ssc:100157760|	| | |	414399|494460|100157760|	MRLC2|CXCL12, SDF-1|MYL9, LC20, MYRL2|	http://www.genome.jp/kegg-bin/show_pathway?ssc04670
mRNA surveillance pathway	KEGG PATHWAY	ssc03015	2	56	0.492732	1	ENSSSCG00000022828|ENSSSCG00000008540	ssc:100526149|ssc:397378|	| |	100526149|397378|	PNN|PPP1CB|	http://www.genome.jp/kegg-bin/show_pathway?ssc03015
TGF-beta signaling pathway	KEGG PATHWAY	ssc04350	2	56	0.492732	1	ENSSSCG00000005045|ENSSSCG00000004012	ssc:100113425|ssc:100153940|	| |	100113425|100153940|	BMP4| |	http://www.genome.jp/kegg-bin/show_pathway?ssc04350
Glycerophospholipid metabolism	KEGG PATHWAY	ssc00564	2	56	0.492732	1	ENSSSCG00000000214|ENSSSCG00000015872	ssc:100153250|ssc:397348|	| |	100153250|397348|	GPD1|MGPD, G3PD, GPD2|	http://www.genome.jp/kegg-bin/show_pathway?ssc00564
Tight junction	KEGG PATHWAY	ssc04530	3	90	0.495129	1	ENSSSCG00000003691|ENSSSCG00000018005|ENSSSCG00000024230	ssc:414399|ssc:100125538|ssc:100157760|	| | |	414399|100125538|100157760|	MRLC2|MYH1|MYL9, LC20, MYRL2|	http://www.genome.jp/kegg-bin/show_pathway?ssc04530
Fructose and mannose metabolism	KEGG PATHWAY	ssc00051	1	23	0.49643	1	ENSSSCG00000012345	ssc:100233197|	|	100233197|	PFKFB1|	http://www.genome.jp/kegg-bin/show_pathway?ssc00051
GnRH signaling pathway	KEGG PATHWAY	ssc04912	2	58	0.511413	1	ENSSSCG00000014362|ENSSSCG00000013735	ssc:397564|ssc:396913|	| |	397564|396913|	HBEGF, DTR|C-JUN, Jun|	http://www.genome.jp/kegg-bin/show_pathway?ssc04912
Pertussis	KEGG PATHWAY	ssc05133	2	59	0.520582	1	ENSSSCG00000002383|ENSSSCG00000013735	ssc:100144486|ssc:396913|	| |	100144486|396913|	FOS, c-fos|C-JUN, Jun|	http://www.genome.jp/kegg-bin/show_pathway?ssc05133
Protein processing in endoplasmic reticulum	KEGG PATHWAY	ssc04141	4	128	0.521048	1	ENSSSCG00000023963|ENSSSCG00000015987|ENSSSCG00000017094|ENSSSCG00000026167|ENSSSCG00000002274	ssc:100516343|ssc:100516343|ssc:100170772|ssc:100155766|ssc:396648|	| | | | |	100516343|100516343|100170772|100155766|396648|	NFE2L2|NFE2L2|MARCH6|SEC23A|HSP70.2, HSPA1A, HSPA1B|	http://www.genome.jp/kegg-bin/show_pathway?ssc04141
Porphyrin and chlorophyll metabolism	KEGG PATHWAY	ssc00860	1	25	0.52562	1	ENSSSCG00000007942	ssc:396622|	|	396622|	HO2|	http://www.genome.jp/kegg-bin/show_pathway?ssc00860
Salmonella infection	KEGG PATHWAY	ssc05132	2	60	0.529636	1	ENSSSCG00000002383|ENSSSCG00000013735	ssc:100144486|ssc:396913|	| |	100144486|396913|	FOS, c-fos|C-JUN, Jun|	http://www.genome.jp/kegg-bin/show_pathway?ssc05132
Pathways in cancer	KEGG PATHWAY	ssc05200	7	235	0.538548	1	ENSSSCG00000013735|ENSSSCG00000017406|ENSSSCG00000022111|ENSSSCG00000002383|ENSSSCG00000006328|ENSSSCG00000005045|ENSSSCG00000009545	ssc:396913|ssc:397340|ssc:100152215|ssc:100144486|ssc:445465|ssc:100113425|ssc:100153454|	| | | | | | |	396913|397340|100152215|100144486|445465|100113425|100153454|	C-JUN, Jun|STAT5B|CDKN1A|FOS, c-fos|RXRG, NR2B3, RXRgamma|BMP4|COL4A2|	http://www.genome.jp/kegg-bin/show_pathway?ssc05200
Toxoplasmosis	KEGG PATHWAY	ssc05145	3	96	0.538607	1	ENSSSCG00000001453|ENSSSCG00000001456|ENSSSCG00000002274	ssc:100135040|ssc:100153387|ssc:396648|	| | |	100135040|100153387|396648|	SLA-DRA, SLA-DR-alpha, SLA-DRA1|SLA-DQA1, SLA-DQA|HSP70.2, HSPA1A, HSPA1B|	http://www.genome.jp/kegg-bin/show_pathway?ssc05145
Influenza A	KEGG PATHWAY	ssc05164	4	131	0.539378	1	ENSSSCG00000001453|ENSSSCG00000001456|ENSSSCG00000013735|ENSSSCG00000002274	ssc:100135040|ssc:100153387|ssc:396913|ssc:396648|	| | | |	100135040|100153387|396913|396648|	SLA-DRA, SLA-DR-alpha, SLA-DRA1|SLA-DQA1, SLA-DQA|C-JUN, Jun|HSP70.2, HSPA1A, HSPA1B|	http://www.genome.jp/kegg-bin/show_pathway?ssc05164
Cysteine and methionine metabolism	KEGG PATHWAY	ssc00270	1	27	0.553121	1	ENSSSCG00000013366	ssc:407245|	|	407245|	LDHA, LDH-A, LDH-M|	http://www.genome.jp/kegg-bin/show_pathway?ssc00270
Bladder cancer	KEGG PATHWAY	ssc05219	1	27	0.553121	1	ENSSSCG00000022111	ssc:100152215|	|	100152215|	CDKN1A|	http://www.genome.jp/kegg-bin/show_pathway?ssc05219
Pancreatic secretion	KEGG PATHWAY	ssc04972	2	63	0.556094	1	ENSSSCG00000000921|ENSSSCG00000027344	ssc:397636|ssc:396875|	| |	397636|396875|	ATP2B1|ATP2A2, ATP2, SERCA2|	http://www.genome.jp/kegg-bin/show_pathway?ssc04972
Carbohydrate digestion and absorption	KEGG PATHWAY	ssc04973	1	28	0.56627	1	ENSSSCG00000015105	ssc:100516688|	|	100516688|	SLC37A4|	http://www.genome.jp/kegg-bin/show_pathway?ssc04973
Notch signaling pathway	KEGG PATHWAY	ssc04330	1	28	0.56627	1	ENSSSCG00000027516	ssc:100511415|	|	100511415|	CIR1|	http://www.genome.jp/kegg-bin/show_pathway?ssc04330
Small cell lung cancer	KEGG PATHWAY	ssc05222	2	65	0.573138	1	ENSSSCG00000006328|ENSSSCG00000009545	ssc:445465|ssc:100153454|	| |	445465|100153454|	RXRG, NR2B3, RXRgamma|COL4A2|	http://www.genome.jp/kegg-bin/show_pathway?ssc05222
Aldosterone-regulated sodium reabsorption	KEGG PATHWAY	ssc04960	1	29	0.579032	1	ENSSSCG00000008038	ssc:100192448|	|	100192448|	SLC9A3R2|	http://www.genome.jp/kegg-bin/show_pathway?ssc04960
Lysine degradation	KEGG PATHWAY	ssc00310	1	29	0.579032	1	ENSSSCG00000024752	ssc:733685|	|	733685|	ALDH2|	http://www.genome.jp/kegg-bin/show_pathway?ssc00310
Cocaine addiction	KEGG PATHWAY	ssc05030	1	30	0.59142	1	ENSSSCG00000013735	ssc:396913|	|	396913|	C-JUN, Jun|	http://www.genome.jp/kegg-bin/show_pathway?ssc05030
Tryptophan metabolism	KEGG PATHWAY	ssc00380	1	30	0.59142	1	ENSSSCG00000024752	ssc:733685|	|	733685|	ALDH2|	http://www.genome.jp/kegg-bin/show_pathway?ssc00380
African trypanosomiasis	KEGG PATHWAY	ssc05143	1	31	0.603445	1	ENSSSCG00000015070	ssc:397691|	|	397691|	APOA1|	http://www.genome.jp/kegg-bin/show_pathway?ssc05143
Prostate cancer	KEGG PATHWAY	ssc05215	2	69	0.605785	1	ENSSSCG00000022111|ENSSSCG00000024960	ssc:100152215|ssc:100515267|	| |	100152215|100515267|	CDKN1A| |	http://www.genome.jp/kegg-bin/show_pathway?ssc05215
Vascular smooth muscle contraction	KEGG PATHWAY	ssc04270	2	70	0.613645	1	ENSSSCG00000008540|ENSSSCG00000024230	ssc:397378|ssc:100157760|	| |	397378|100157760|	PPP1CB|MYL9, LC20, MYRL2|	http://www.genome.jp/kegg-bin/show_pathway?ssc04270
Type II diabetes mellitus	KEGG PATHWAY	ssc04930	1	32	0.615116	1	ENSSSCG00000001930	ssc:100158154|	|	100158154|	PKM2, PK-S|	http://www.genome.jp/kegg-bin/show_pathway?ssc04930
Endocytosis	KEGG PATHWAY	ssc04144	4	145	0.619842	1	ENSSSCG00000001229|ENSSSCG00000012160|ENSSSCG00000013017|ENSSSCG00000002274	ssc:100135029|ssc:100522530|ssc:100516416|ssc:396648|	| | | |	100135029|100522530|100516416|396648|	SLA-5, SLA-1, SLA-5b|SH3KBP1|EHD1|HSP70.2, HSPA1A, HSPA1B|	http://www.genome.jp/kegg-bin/show_pathway?ssc04144
Purine metabolism	KEGG PATHWAY	ssc00230	3	111	0.637231	1	ENSSSCG00000018052|ENSSSCG00000001930|ENSSSCG00000005627	ssc:100513046|ssc:100158154|ssc:100521423|	| | |	100513046|100158154|100521423|	|PKM2, PK-S|AK1, Myokinase|	http://www.genome.jp/kegg-bin/show_pathway?ssc00230
Amyotrophic lateral sclerosis (ALS)	KEGG PATHWAY	ssc05014	1	34	0.637441	1	ENSSSCG00000029613	ssc:100152434|	|	100152434|	PRPH|	http://www.genome.jp/kegg-bin/show_pathway?ssc05014
Mineral absorption	KEGG PATHWAY	ssc04978	1	35	0.648114	1	ENSSSCG00000007942	ssc:396622|	|	396622|	HO2|	http://www.genome.jp/kegg-bin/show_pathway?ssc04978
Amoebiasis	KEGG PATHWAY	ssc05146	2	75	0.65115	1	ENSSSCG00000002294|ENSSSCG00000009545	ssc:100155893|ssc:100153454|	| |	100155893|100153454|	ARG2|COL4A2|	http://www.genome.jp/kegg-bin/show_pathway?ssc05146
Oocyte meiosis	KEGG PATHWAY	ssc04114	2	75	0.65115	1	ENSSSCG00000010606|ENSSSCG00000008540	ssc:100156642|ssc:397378|	| |	100156642|397378|	SLK|PPP1CB|	http://www.genome.jp/kegg-bin/show_pathway?ssc04114
Toll-like receptor signaling pathway	KEGG PATHWAY	ssc04620	2	76	0.658294	1	ENSSSCG00000002383|ENSSSCG00000013735	ssc:100144486|ssc:396913|	| |	100144486|396913|	FOS, c-fos|C-JUN, Jun|	http://www.genome.jp/kegg-bin/show_pathway?ssc04620
Non-small cell lung cancer	KEGG PATHWAY	ssc05223	1	36	0.658474	1	ENSSSCG00000006328	ssc:445465|	|	445465|	RXRG, NR2B3, RXRgamma|	http://www.genome.jp/kegg-bin/show_pathway?ssc05223
Jak-STAT signaling pathway	KEGG PATHWAY	ssc04630	3	116	0.666647	1	ENSSSCG00000017406|ENSSSCG00000016866|ENSSSCG00000027628	ssc:397340|ssc:397488|ssc:399522|	| | |	397340|397488|399522|	STAT5B|GHR|IL6R, IL-6Ralpha|	http://www.genome.jp/kegg-bin/show_pathway?ssc04630
Long-term potentiation	KEGG PATHWAY	ssc04720	1	38	0.67829	1	ENSSSCG00000008540	ssc:397378|	|	397378|	PPP1CB|	http://www.genome.jp/kegg-bin/show_pathway?ssc04720
Hedgehog signaling pathway	KEGG PATHWAY	ssc04340	1	38	0.67829	1	ENSSSCG00000005045	ssc:100113425|	|	100113425|	BMP4|	http://www.genome.jp/kegg-bin/show_pathway?ssc04340
Basal cell carcinoma	KEGG PATHWAY	ssc05217	1	38	0.67829	1	ENSSSCG00000005045	ssc:100113425|	|	100113425|	BMP4|	http://www.genome.jp/kegg-bin/show_pathway?ssc05217
Dopaminergic synapse	KEGG PATHWAY	ssc04728	2	79	0.679026	1	ENSSSCG00000008540|ENSSSCG00000002383	ssc:397378|ssc:100144486|	| |	397378|100144486|	PPP1CB|FOS, c-fos|	http://www.genome.jp/kegg-bin/show_pathway?ssc04728
Acute myeloid leukemia	KEGG PATHWAY	ssc05221	1	39	0.687764	1	ENSSSCG00000017406	ssc:397340|	|	397340|	STAT5B|	http://www.genome.jp/kegg-bin/show_pathway?ssc05221
Amino sugar and nucleotide sugar metabolism	KEGG PATHWAY	ssc00520	1	39	0.687764	1	ENSSSCG00000002873	ssc:397602|	|	397602|	GPI, PGI|	http://www.genome.jp/kegg-bin/show_pathway?ssc00520
Systemic lupus erythematosus	KEGG PATHWAY	ssc05322	2	81	0.69227	1	ENSSSCG00000001453|ENSSSCG00000001456	ssc:100135040|ssc:100153387|	| |	100135040|100153387|	SLA-DRA, SLA-DR-alpha, SLA-DRA1|SLA-DQA1, SLA-DQA|	http://www.genome.jp/kegg-bin/show_pathway?ssc05322
Glioma	KEGG PATHWAY	ssc05214	1	40	0.696959	1	ENSSSCG00000022111	ssc:100152215|	|	100152215|	CDKN1A|	http://www.genome.jp/kegg-bin/show_pathway?ssc05214
Glycerolipid metabolism	KEGG PATHWAY	ssc00561	1	43	0.722956	1	ENSSSCG00000024752	ssc:733685|	|	733685|	ALDH2|	http://www.genome.jp/kegg-bin/show_pathway?ssc00561
Cytokine-cytokine receptor interaction	KEGG PATHWAY	ssc04060	4	167	0.72707	1	ENSSSCG00000027628|ENSSSCG00000010414|ENSSSCG00000016866|ENSSSCG00000027130	ssc:399522|ssc:494460|ssc:397488|ssc:100217390|	| | | |	399522|494460|397488|100217390|	IL6R, IL-6Ralpha|CXCL12, SDF-1|GHR|TNFRSF12A, Fn14, TWEAKR|	http://www.genome.jp/kegg-bin/show_pathway?ssc04060
Calcium signaling pathway	KEGG PATHWAY	ssc04020	3	128	0.730036	1	ENSSSCG00000000921|ENSSSCG00000004248|ENSSSCG00000027344	ssc:397636|ssc:397421|ssc:396875|	| | |	397636|397421|396875|	ATP2B1|PLN|ATP2A2, ATP2, SERCA2|	http://www.genome.jp/kegg-bin/show_pathway?ssc04020
Neurotrophin signaling pathway	KEGG PATHWAY	ssc04722	2	88	0.73511	1	ENSSSCG00000013735|ENSSSCG00000009048	ssc:396913|ssc:100511026|	| |	396913|100511026|	C-JUN, Jun|GAB1|	http://www.genome.jp/kegg-bin/show_pathway?ssc04722
Lysosome	KEGG PATHWAY	ssc04142	2	88	0.73511	1	ENSSSCG00000008980|ENSSSCG00000014924	ssc:414407|ssc:100522387|	| |	414407|100522387|	SCARB2| |	http://www.genome.jp/kegg-bin/show_pathway?ssc04142
Bacterial invasion of epithelial cells	KEGG PATHWAY	ssc05100	1	45	0.739039	1	ENSSSCG00000009048	ssc:100511026|	|	100511026|	GAB1|	http://www.genome.jp/kegg-bin/show_pathway?ssc05100
Spliceosome	KEGG PATHWAY	ssc03040	2	89	0.740798	1	ENSSSCG00000026644|ENSSSCG00000002274	ssc:100512557|ssc:396648|	| |	100512557|396648|	DDX42|HSP70.2, HSPA1A, HSPA1B|	http://www.genome.jp/kegg-bin/show_pathway?ssc03040
Osteoclast differentiation	KEGG PATHWAY	ssc04380	2	90	0.746382	1	ENSSSCG00000002383|ENSSSCG00000013735	ssc:100144486|ssc:396913|	| |	100144486|396913|	FOS, c-fos|C-JUN, Jun|	http://www.genome.jp/kegg-bin/show_pathway?ssc04380
Chagas disease (American trypanosomiasis)	KEGG PATHWAY	ssc05142	2	90	0.746382	1	ENSSSCG00000002383|ENSSSCG00000013735	ssc:100144486|ssc:396913|	| |	100144486|396913|	FOS, c-fos|C-JUN, Jun|	http://www.genome.jp/kegg-bin/show_pathway?ssc05142
Aminoacyl-tRNA biosynthesis	KEGG PATHWAY	ssc00970	1	46	0.746728	1	ENSSSCG00000022904	ssc:100524650|	|	100524650|	|	http://www.genome.jp/kegg-bin/show_pathway?ssc00970
Alzheimer's disease	KEGG PATHWAY	ssc05010	3	132	0.748945	1	ENSSSCG00000027344|ENSSSCG00000003088|ENSSSCG00000018075	ssc:396875|ssc:397576|ssc:808503|	| | |	396875|397576|808503|	ATP2A2, ATP2, SERCA2|APOE|COX1|	http://www.genome.jp/kegg-bin/show_pathway?ssc05010
Metabolism of xenobiotics by cytochrome P450	KEGG PATHWAY	ssc00980	1	47	0.754191	1	ENSSSCG00000020706	ssc:397143|	|	397143|	CBR1|	http://www.genome.jp/kegg-bin/show_pathway?ssc00980
RNA degradation	KEGG PATHWAY	ssc03018	1	51	0.781912	1	ENSSSCG00000017904	ssc:692156|	|	692156|	ENO3|	http://www.genome.jp/kegg-bin/show_pathway?ssc03018
Salivary secretion	KEGG PATHWAY	ssc04970	1	53	0.79458	1	ENSSSCG00000000921	ssc:397636|	|	397636|	ATP2B1|	http://www.genome.jp/kegg-bin/show_pathway?ssc04970
Gap junction	KEGG PATHWAY	ssc04540	1	53	0.79458	1	ENSSSCG00000024960	ssc:100515267|	|	100515267|	|	http://www.genome.jp/kegg-bin/show_pathway?ssc04540
RIG-I-like receptor signaling pathway	KEGG PATHWAY	ssc04622	1	54	0.800636	1	ENSSSCG00000026430	ssc:100515940|	|	100515940|	DDX3X|	http://www.genome.jp/kegg-bin/show_pathway?ssc04622
Arrhythmogenic right ventricular cardiomyopathy (ARVC)	KEGG PATHWAY	ssc05412	1	55	0.806514	1	ENSSSCG00000017510	ssc:100514316|	|	100514316|	CACNB1|	http://www.genome.jp/kegg-bin/show_pathway?ssc05412
Complement and coagulation cascades	KEGG PATHWAY	ssc04610	1	60	0.833411	1	ENSSSCG00000024791	ssc:397347|	|	397347|	CD59|	http://www.genome.jp/kegg-bin/show_pathway?ssc04610
Measles	KEGG PATHWAY	ssc05162	2	110	0.838058	1	ENSSSCG00000017406|ENSSSCG00000002274	ssc:397340|ssc:396648|	| |	397340|396648|	STAT5B|HSP70.2, HSPA1A, HSPA1B|	http://www.genome.jp/kegg-bin/show_pathway?ssc05162
Pyrimidine metabolism	KEGG PATHWAY	ssc00240	1	62	0.843094	1	ENSSSCG00000018052	ssc:100513046|	|	100513046|	|	http://www.genome.jp/kegg-bin/show_pathway?ssc00240
Ribosome	KEGG PATHWAY	ssc03010	1	70	0.876528	1	ENSSSCG00000024398	ssc:780432|	|	780432|	RPL13A|	http://www.genome.jp/kegg-bin/show_pathway?ssc03010
Cholinergic synapse	KEGG PATHWAY	ssc04725	1	71	0.880173	1	ENSSSCG00000002383	ssc:100144486|	|	100144486|	FOS, c-fos|	http://www.genome.jp/kegg-bin/show_pathway?ssc04725
Chemokine signaling pathway	KEGG PATHWAY	ssc04062	2	125	0.885913	1	ENSSSCG00000010414|ENSSSCG00000017406	ssc:494460|ssc:397340|	| |	494460|397340|	CXCL12, SDF-1|STAT5B|	http://www.genome.jp/kegg-bin/show_pathway?ssc04062
Tuberculosis	KEGG PATHWAY	ssc05152	2	133	0.905733	1	ENSSSCG00000001453|ENSSSCG00000001456	ssc:100135040|ssc:100153387|	| |	100135040|100153387|	SLA-DRA, SLA-DR-alpha, SLA-DRA1|SLA-DQA1, SLA-DQA|	http://www.genome.jp/kegg-bin/show_pathway?ssc05152
Ubiquitin mediated proteolysis	KEGG PATHWAY	ssc04120	1	92	0.936168	1	ENSSSCG00000017105	ssc:100518586|	|	100518586|	|	http://www.genome.jp/kegg-bin/show_pathway?ssc04120
Wnt signaling pathway	KEGG PATHWAY	ssc04310	1	96	0.94339	1	ENSSSCG00000013735	ssc:396913|	|	396913|	C-JUN, Jun|	http://www.genome.jp/kegg-bin/show_pathway?ssc04310
Hepatitis C	KEGG PATHWAY	ssc05160	1	104	0.955481	1	ENSSSCG00000022111	ssc:100152215|	|	100152215|	CDKN1A|	http://www.genome.jp/kegg-bin/show_pathway?ssc05160
Neuroactive ligand-receptor interaction	KEGG PATHWAY	ssc04080	2	189	0.976637	1	ENSSSCG00000016866|ENSSSCG00000021059	ssc:397488|ssc:606743|	| |	397488|606743|	GHR| |	http://www.genome.jp/kegg-bin/show_pathway?ssc04080
Huntington's disease	KEGG PATHWAY	ssc05016	1	140	0.984928	1	ENSSSCG00000018075	ssc:808503|	|	808503|	COX1|	http://www.genome.jp/kegg-bin/show_pathway?ssc05016
